# Supplementary material for: Activation of small molecules by cyclic alkyl amino silylenes (CAASis) and germylenes (CAAGes): a theoretical study
Source: Royal Society of Chemistry journal article supplement (doi:10.1039/d0dt03043k), 2020-01-01
Supplement: d0dt03043k1.pdf [file d0dt03043k1.pdf]

## Supporting Information

### Activation of Small Molecules by Cyclic Alkyl Amino Silylenes (CAASis) and Germylenes (CAAGes): A Theoretical Study

Bijoy Ghosh,<sup>‡</sup> Priyam Bharadwaz,<sup>‡</sup> Nibedita Sarkar and Ashwini K. Phukan\*

<sup>‡</sup>These authors contributed equally

Department of Chemical Sciences, Tezpur University, Napaam 784028, Assam, India

E-Mail: [ashwini@tezu.ernet.in](mailto:ashwini@tezu.ernet.in)

## Table of content

|                 |                                                                                                                                                                                                                                                                                                                                                                                                                                         |    |
|-----------------|-----------------------------------------------------------------------------------------------------------------------------------------------------------------------------------------------------------------------------------------------------------------------------------------------------------------------------------------------------------------------------------------------------------------------------------------|----|
| <b>Table S1</b> | Calculated Mulliken spin density at the central atom (E =Si/Ge), $\alpha$ -nitrogen ( $N_\alpha$ ) and carbon ( $C_\alpha$ ) atom (with respect to the central atom) for <b>1Si-14Si</b> and <b>1Ge-14Ge</b> .                                                                                                                                                                                                                          | 6  |
| <b>Table S2</b> | Calculated natural charges (q) and occupancies of the formally vacant valence p-orbital (Occ) at the central atom (Si/Ge) for <b>1Si-14Si</b> and <b>1Ge-14Ge</b>                                                                                                                                                                                                                                                                       | 7  |
| <b>Table S3</b> | Calculated important geometrical parameters and natural charges at pseudo hydridic ( $q_{H_{hy}}$ ) and positively polarized hydrogen atom ( $q_H$ ) and occupancies of the formally vacant p-orbital (Occ <sub>Si/Ge</sub> ) of the transition states involved in the activation of hydrogen by CAASis ( <b>1Si-5Si</b> , <b>8Si-9Si</b> and <b>14Si</b> ) and CAAGes ( <b>1Ge-5Ge</b> , <b>8Ge-9Ge</b> and <b>14Ge</b> ).             | 8  |
| <b>Table S4</b> | Calculated important geometrical parameters and natural charges at the nitrogen atom of NH <sub>3</sub> and Si/Ge center for the intermediate ( <b>Int</b> ) involved in the activation of N – H bond of NH <sub>3</sub> by CAASis ( <b>1Si-5Si</b> and <b>14Si</b> ), CAAGes ( <b>1Ge-5Ge</b> and <b>14Ge</b> ) and NacNacSi ( <b>IIa</b> ).                                                                                           | 9  |
| <b>Table S5</b> | Calculated important geometrical parameters and natural charges at the nitrogen atom of the pseudo amide fragment ( $q_{NH_2}$ ) and hydrogen atom ( $q_H$ ) of the transition states involved in the activation of N-H bond of NH <sub>3</sub> by CAASis ( <b>1Si-5Si</b> , <b>8Si-9Si</b> and <b>14Si</b> ), CAAGes ( <b>1Ge-5Ge</b> , <b>8Ge-9Ge</b> and <b>14Ge</b> ) and NacNacSi ( <b>IIa</b> ).                                  | 10 |
| <b>Table S6</b> | Calculated important geometrical parameters and natural charges at the carbon atom of the PhCH <sub>2</sub> fragment ( $q_{PhCH_2}$ ) and hydrogen atom ( $q_H$ ) and occupancies of the formally vacant p-orbital (Occ <sub>Si/Ge</sub> ) of the transition states involved in the activation of toluene by CAASis ( <b>1Si-5Si</b> , <b>8Si-9Si</b> and <b>14Si</b> ) and CAAGes ( <b>1Ge-5Ge</b> , <b>8Ge-9Ge</b> and <b>14Ge</b> ). | 11 |

|                 |                                                                                                                                                                                                                                                                                                                                                                                                                      |       |
|-----------------|----------------------------------------------------------------------------------------------------------------------------------------------------------------------------------------------------------------------------------------------------------------------------------------------------------------------------------------------------------------------------------------------------------------------|-------|
| <b>Table S7</b> | Calculated important geometrical parameters and natural charges at the silicon atom of the SiEt <sub>3</sub> H and at the central atom (E = Si, Ge) of the van der Waals complexes involved in the activation of Si-H bond of SiEt <sub>3</sub> H by CAASis ( <b>1Si-5Si</b> , <b>8Si-9Si</b> and <b>14Si</b> ), CAAGes ( <b>1Ge-5Ge</b> , <b>8Ge-9Ge</b> and <b>14Ge</b> ) and <b>IX</b> .                          | 12    |
| <b>Table S8</b> | Calculated important geometrical parameters and natural charges at the silicon atom of the SiEt <sub>3</sub> fragment ( $q_{\text{SiEt}_3}$ ) and hydrogen atom ( $q_{\text{H}}$ ) of the transition states involved in the activation of Si-H bond of SiEt <sub>3</sub> H by CAASis ( <b>1Si-5Si</b> , <b>8Si-9Si</b> and <b>14Si</b> ), CAAGes ( <b>1Ge-5Ge</b> , <b>8Ge-9Ge</b> and <b>14Ge</b> ) and <b>IX</b> . | 13    |
| <b>Fig. S1</b>  | Correlation plot between $E_{\pi^*}$ (eV) and natural charge at the central atom (E = Si/Ge) for the (a) CAASis and (b) CAAGes.                                                                                                                                                                                                                                                                                      | 14    |
| <b>Fig. S2</b>  | Correlation plots between the $E_{\sigma}$ (eV) and PA (kcal mol <sup>-1</sup> ) for (a) CAASis ( <b>1Si-14Si</b> ) and (b) CAAGes ( <b>1Ge-14Ge</b> ).                                                                                                                                                                                                                                                              | 15    |
| <b>Fig. S3</b>  | Optimized geometries for the transition states involved in the activation of dihydrogen by CAASis ( <b>2Si-5Si</b> , <b>8Si-9Si</b> and <b>14Si</b> ) and CAAGes ( <b>2Ge-5Ge</b> , <b>8Ge-9Ge</b> and <b>14Ge</b> ).                                                                                                                                                                                                | 16-18 |
| <b>Fig. S4</b>  | Optimized geometries for the intermediate (Int <sup>N-H</sup> ) involved in the activation of N-H bond of NH <sub>3</sub> by CAASis ( <b>2Si-5Si</b> , <b>8Si-9Si</b> and <b>14Si</b> ), CAAGes ( <b>2Ge-5Ge</b> , <b>8Ge-9Ge</b> and <b>14Ge</b> ) and NacNacSi ( <b>IIa</b> ).                                                                                                                                     | 19-20 |
| <b>Fig. S5</b>  | Optimized geometries for the transition states involved in the activation of N-H bond of NH <sub>3</sub> by CAASis ( <b>2Si-5Si</b> , <b>8Si-9Si</b> and <b>14Si</b> ), CAAGes ( <b>2Ge-5Ge</b> , <b>8Ge-9Ge</b> and <b>14Ge</b> ) and NacNacSi ( <b>IIa</b> ).                                                                                                                                                      | 21-23 |
| <b>Fig. S6</b>  | Optimized geometries for the transition states involved in the activation of C-H bond of CH <sub>3</sub> Ph by CAASis ( <b>2Si-4Si</b> , <b>8Si-9Si</b> and <b>14Si</b> ) and CAAGes ( <b>1Ge-5Ge</b> , <b>8Ge-9Ge</b> and <b>14Ge</b> ).                                                                                                                                                                            | 24-26 |

|                 |                                                                                                                                                                                                                                                                 |         |
|-----------------|-----------------------------------------------------------------------------------------------------------------------------------------------------------------------------------------------------------------------------------------------------------------|---------|
| <b>Fig. S7</b>  | Optimized geometries for the van der Waals complexes involved in the activation of Si – H bond of SiEt <sub>3</sub> H by CAASis ( <b>2Si-5Si</b> , <b>8Si-9Si</b> and <b>14Si</b> ), CAAGes ( <b>1Ge-5Ge</b> , <b>8Ge-9Ge</b> and <b>14Ge</b> ) and <b>IX</b> . | 27-30   |
| <b>Fig. S8</b>  | Optimized geometries for the transition states involved in the activation of Si – H bond of SiEt <sub>3</sub> H by CAASis ( <b>2Si-5Si</b> , <b>8Si-9Si</b> and <b>14Si</b> ), CAAGes ( <b>1Ge-5Ge</b> , <b>8Ge-9Ge</b> and <b>14Ge</b> ) and <b>IX</b> .       | 31-34   |
| <b>Fig. S9</b>  | Optimized geometries of the H-H splitting product obtained for CAASis ( <b>1Si-5Si</b> , <b>8Si-9Si</b> and <b>14Si</b> ) and CAAGes ( <b>1Ge-5Ge</b> , <b>8Ge-9Ge</b> and <b>14Ge</b> ).                                                                       | 35-38   |
| <b>Fig. S10</b> | Optimized geometries of the N-H splitting product obtained for CAASis ( <b>1Si-5Si</b> , <b>8Si-9Si</b> and <b>14Si</b> ), CAAGes ( <b>1Ge-5Ge</b> , <b>8Ge-9Ge</b> and <b>14Ge</b> ) and NacNacSi ( <b>IIa</b> ).                                              | 39-43   |
| <b>Fig. S11</b> | Optimized geometries of the C-H splitting product obtained for CAASis ( <b>1Si-5Si</b> , <b>8Si-9Si</b> and <b>14Si</b> ) and CAAGes ( <b>1Ge-5Ge</b> , <b>8Ge-9Ge</b> and <b>14Ge</b> ).                                                                       | 44-47   |
| <b>Fig. S12</b> | Optimized geometries of the Si-H splitting product obtained for CAASis ( <b>1Si-5Si</b> , <b>8Si-9Si</b> and <b>14Si</b> ), CAAGes ( <b>1Ge-5Ge</b> , <b>8Ge-9Ge</b> and <b>14Ge</b> ) and <b>IX</b> .                                                          | 48-52   |
|                 | Cartesian coordinates of CAASis ( <b>1Si-14Si</b> ) and CAAGes ( <b>1Ge-14Ge</b> ) in their optimized singlet (S) and triplet (T) state.                                                                                                                        | 53-113  |
|                 | Cartesian coordinates of <b>IIa</b> , <b>IX</b> , diammino silylene/germylene ( <b>I</b> ), H <sub>2</sub> , NH <sub>3</sub> , CH <sub>3</sub> Ph and SiEt <sub>3</sub> H in their optimized state.                                                             | 113-119 |
|                 | Cartesian coordinates of the transition states involved in the activation of hydrogen by CAASis ( <b>1Si-5Si</b> , <b>8Si-9Si</b> and <b>14Si</b> ) and CAAGes ( <b>1Ge-5Ge</b> , <b>8Ge-9Ge</b> and <b>14Ge</b> ).                                             | 119-137 |
|                 | Cartesian coordinates of the intermediates involved in the activation of N – H bond of NH <sub>3</sub> by CAASis ( <b>1Si-5Si</b> , <b>8Si-9Si</b> and <b>14Si</b> ), CAAGes ( <b>1Ge-5Ge</b> , <b>8Ge-9Ge</b> and <b>14Ge</b> ) and NacNacSi ( <b>IIa</b> ).   | 138-158 |
|                 | Cartesian coordinates of the transition states involved in the activation of N – H bond of NH <sub>3</sub> by CAASis ( <b>1Si-5Si</b> , <b>8Si-9Si</b> and <b>14Si</b> ), CAAGes ( <b>1Ge-5Ge</b> ,                                                             | 158-179 |

**8Ge-9Ge and 14Ge) and NacNacSi (IIa).**

Cartesian coordinates of the transition states involved in the activation of C – H bond of CH<sub>3</sub>Ph by CAASis (**1Si-5Si, 8Si-9Si and 14Si**) and CAAGes (**1Ge-5Ge, 8Ge-9Ge and 14Ge**). 179-203

Cartesian coordinates of the van der Waals complexes involved in the activation of Si – H bond of SiEt<sub>3</sub>H by CAASis (**1Si-5Si, 8Si-9Si and 14Si**), CAAGes (**1Ge-5Ge, 8Ge-9Ge and 14Ge**) and **IX**. 203-233

Cartesian coordinates of the transition states involved in the activation of Si – H bond of SiEt<sub>3</sub>H by CAASis (**1Si-5Si, 8Si-9Si and 14Si**), CAAGes (**1Ge-5Ge, 8Ge-9Ge and 14Ge**) and **IX**. 233-261

Cartesian coordinates of the H – H splitting product obtained for CAASis (**1Si-5Si, 8Si-9Si and 14Si**) and CAAGes (**1Ge-5Ge, 8Ge-9Ge and 14Ge**). 261-280

Cartesian coordinates of the N – H splitting product obtained for CAASis (**1Si-5Si, 8Si-9Si and 14Si**), CAAGes (**1Ge-5Ge, 8Ge-9Ge and 14Ge**) and NacNacSi (**IIa**). 280-301

Cartesian coordinates of the C – H splitting product obtained for CAASis (**1Si-5Si, 8Si-9Si and 14Si**) and CAAGes (**1Ge-5Ge, 8Ge-9Ge and 14Ge**). 301-325

Cartesian coordinates of the Si – H splitting product obtained for CAASis (**1Si-5Si, 8Si-9Si and 14Si**), CAAGes (**1Ge-5Ge, 8Ge-9Ge and 14Ge**) and **IX**. 325-354

**Table S1** Calculated Mulliken spin density at the central atom (E =Si/Ge),  $\alpha$ -nitrogen ( $N_\alpha$ ) and carbon ( $C_\alpha$ ) atom (with respect to the central atom) for **1Si-14Si** and **1Ge-14Ge**.

| <b>Molecules</b> | <b>Si</b> | <b><math>N_\alpha</math></b> | <b><math>C_\alpha</math></b> | <b>Molecules</b> | <b>Ge</b> | <b><math>N_\alpha</math></b> | <b><math>C_\alpha</math></b> |
|------------------|-----------|------------------------------|------------------------------|------------------|-----------|------------------------------|------------------------------|
| <b>1Si</b>       | 1.446     | 0.125                        | 0.281                        | <b>1Ge</b>       | 0.917     | 0.429                        | 0.148                        |
| <b>2Si</b>       | 1.098     | 0.225                        | 0.202                        | <b>2Ge</b>       | 1.029     | 0.284                        | 0.145                        |
| <b>3Si</b>       | 1.477     | 0.083                        | 0.319                        | <b>3Ge</b>       | 1.271     | 0.096                        | 0.498                        |
| <b>4Si</b>       | 1.471     | 0.066                        | 0.267                        | <b>4Ge</b>       | 1.248     | 0.036                        | 0.449                        |
| <b>5Si</b>       | 1.558     | 0.088                        | 0.215                        | <b>5Ge</b>       | 1.292     | 0.064                        | 0.554                        |
| <b>6Si</b>       | 1.229     | 0.206                        | 0.240                        | <b>6Ge</b>       | 1.024     | 0.329                        | 0.176                        |
| <b>7Si</b>       | 1.566     | 0.105                        | 0.019                        | <b>7Ge</b>       | 0.834     | 0.502                        | -0.105                       |
| <b>8Si</b>       | 0.847     | 0.078                        | 0.718                        | <b>8Ge</b>       | 0.884     | 0.078                        | 0.715                        |
| <b>9Si</b>       | 0.967     | 0.137                        | 0.184                        | <b>9Ge</b>       | 0.951     | 0.167                        | 0.205                        |
| <b>10Si</b>      | 1.045     | 0.115                        | 0.273                        | <b>10Ge</b>      | 0.996     | 0.146                        | 0.265                        |
| <b>11Si</b>      | 1.600     | 0.095                        | 0.096                        | <b>11Ge</b>      | 0.828     | 0.506                        | 0.036                        |
| <b>12Si</b>      | 0.890     | 0.052                        | 0.656                        | <b>12Ge</b>      | 0.904     | 0.057                        | 0.671                        |
| <b>13Si</b>      | 1.496     | 0.026                        | 0.152                        | <b>13Ge</b>      | 0.924     | 0.103                        | 0.667                        |
| <b>14Si</b>      | 1.407     | 0.032                        | 0.103                        | <b>14Ge</b>      | 0.885     | 0.355                        | 0.159                        |

**Table S2** Calculated natural charges ( $q$ ) and occupancies of the formally vacant valence p-orbital (Occ) at the central atom (Si/Ge) for **1Si-14Si** and **1Ge-14Ge**.

| <b>Molecules</b> | $q_{\text{Si}}$ | Occ <sub>Si</sub> | <b>Molecules</b> | $q_{\text{Ge}}$ | Occ <sub>Ge</sub> |
|------------------|-----------------|-------------------|------------------|-----------------|-------------------|
| <b>1Si</b>       | 1.105           | 0.256             | <b>1Ge</b>       | 1.071           | 0.291             |
| <b>2Si</b>       | 1.024           | 0.301             | <b>2Ge</b>       | 1.000           | 0.310             |
| <b>3Si</b>       | 1.145           | 0.388             | <b>3Ge</b>       | 1.109           | 0.265             |
| <b>4Si</b>       | 1.148           | 0.212             | <b>4Ge</b>       | 1.099           | 0.286             |
| <b>5Si</b>       | 1.155           | 0.182             | <b>5Ge</b>       | 1.124           | 0.176             |
| <b>6Si</b>       | 1.073           | 0.288             | <b>6Ge</b>       | 1.043           | 0.288             |
| <b>7Si</b>       | 0.996           | 0.240             | <b>7Ge</b>       | 1.007           | 0.241             |
| <b>8Si</b>       | 0.908           | 0.360             | <b>8Ge</b>       | 0.908           | 0.353             |
| <b>9Si</b>       | 0.755           | 0.531             | <b>9Ge</b>       | 0.755           | 0.530             |
| <b>10Si</b>      | 0.842           | 0.426             | <b>10Ge</b>      | 0.841           | 0.442             |
| <b>11Si</b>      | 0.965           | 0.294             | <b>11Ge</b>      | 0.965           | 0.298             |
| <b>12Si</b>      | 0.937           | 0.346             | <b>12Ge</b>      | 0.938           | 0.348             |
| <b>13Si</b>      | 1.005           | 0.276             | <b>13Ge</b>      | 1.007           | 0.278             |
| <b>14Si</b>      | 1.001           | 0.262             | <b>14Ge</b>      | 1.005           | 0.262             |

**Table S3** Calculated important geometrical parameters and natural charges at pseudo hydridic ( $q_{H_{hy}}$ ) and positively polarized hydrogen atom ( $q_H$ ) and occupancies of the formally vacant p-orbital ( $Occ_{Si/Ge}$ ) of the transition states involved in the activation of hydrogen by CAASis (**1Si-5Si**, **8Si-9Si** and **14Si**) and CAAGes (**1Ge-5Ge**, **8Ge-9Ge** and **14Ge**). Bond lengths (E – X, E = Si, Ge and X = N, C), bond angles ( $\angle C-E-N$ ) are given in Å and in degree ( $^\circ$ ) respectively.

| Molecules                   | $H_{hy} - H$ | E – H | E – $H_{hy}$ | E - X       | $\angle C-E-N$ | $Occ_{Si/Ge}$ | $q_{H_{hy}}$ | $q_H$  |
|-----------------------------|--------------|-------|--------------|-------------|----------------|---------------|--------------|--------|
| <b>1SiTS<sup>H-H</sup></b>  | 1.174        | 1.514 | 1.764        | 1.746/1.879 | 96.8           | 0.791         | -0.080       | 0.121  |
| <b>2SiTS<sup>H-H</sup></b>  | 1.184        | 1.512 | 1.732        | 1.765/1.883 | 95.0           | 0.596         | -0.055       | 0.029  |
| <b>3SiTS<sup>H-H</sup></b>  | 1.151        | 1.520 | 1.756        | 1.751/1.880 | 98.9           | 0.484         | -0.064       | 0.014  |
| <b>4SiTS<sup>H-H</sup></b>  | 1.145        | 1.521 | 1.747        | 1.744/1.894 | 103.3          | 0.928         | -0.062       | 0.012  |
| <b>5SiTS<sup>H-H</sup></b>  | 1.180        | 1.510 | 1.732        | 1.770/1.873 | 95.8           | 0.671         | -0.048       | 0.034  |
| <b>8SiTS<sup>H-H</sup></b>  | 1.238        | 1.507 | 1.871        | 1.757/1.783 | 95.5           | 0.579         | -0.171       | -0.001 |
| <b>9SiTS<sup>H-H</sup></b>  | 1.303        | 1.502 | 2.029        | 1.750/1.799 | 94.1           | 0.783         | -0.282       | -0.028 |
| <b>14SiTS<sup>H-H</sup></b> | 1.191        | 1.510 | 1.845        | 1.750/1.808 | 96.6           | 0.665         | -0.133       | -0.001 |
| <b>1GeTS<sup>H-H</sup></b>  | 1.309        | 1.559 | 1.825        | 1.874/1.977 | 93.3           | 0.814         | -0.108       | 0.037  |
| <b>2GeTS<sup>H-H</sup></b>  | 1.316        | 1.557 | 1.804        | 1.885/1.975 | 91.6           | 0.603         | -0.089       | 0.041  |
| <b>3GeTS<sup>H-H</sup></b>  | 1.282        | 1.563 | 1.841        | 1.874/1.978 | 95.7           | 0.739         | -0.177       | 0.028  |
| <b>4GeTS<sup>H-H</sup></b>  | 1.287        | 1.565 | 1.819        | 1.866/1.984 | 98.7           | 0.535         | -0.101       | 0.026  |
| <b>5GeTS<sup>H-H</sup></b>  | 1.310        | 1.556 | 1.798        | 1.889/1.968 | 92.0           | 0.550         | -0.079       | 0.044  |
| <b>8GeTS<sup>H-H</sup></b>  | 1.351        | 1.548 | 1.898        | 1.877/1.887 | 92.3           | 0.625         | -0.173       | 0.022  |
| <b>9GeTS<sup>H-H</sup></b>  | 1.413        | 1.541 | 2.042        | 1.866/1.888 | 91.0           | 0.759         | -0.294       | -0.001 |
| <b>14GeTS<sup>H-H</sup></b> | 1.320        | 1.550 | 1.902        | 1.868/1.891 | 93.2           | 0.697         | -0.171       | 0.017  |



**Table S4** Calculated important geometrical parameters and natural charges at the nitrogen atom of NH<sub>3</sub> and Si/Ge center for the intermediate (**Int**) involved in the activation of N – H bond of NH<sub>3</sub> by CAASis (**1Si-5Si** and **14Si**), CAAGes (**1Ge-5Ge** and **14Ge**) and NacNacSi (**IIa**). Bond lengths are given in Å and Wiberg Bond Index (WBI) values are given within parentheses.

| <b>Molecules</b>             | <b>H<sub>3</sub>N – Si</b> | <b>q<sub>NH<sub>3</sub></sub></b> | <b>q<sub>Si</sub></b> | <b>Molecules</b>             | <b>H<sub>3</sub>N – Ge</b> | <b>q<sub>NH<sub>3</sub></sub></b> | <b>q<sub>Ge</sub></b> |
|------------------------------|----------------------------|-----------------------------------|-----------------------|------------------------------|----------------------------|-----------------------------------|-----------------------|
| <b>1SiInt<sup>N-H</sup></b>  | 2.135<br>(0.344)           | -1.013                            | 1.021                 | <b>1GeInt<sup>N-H</sup></b>  | 2.267<br>(0.317)           | -1.020                            | 1.004                 |
| <b>2SiInt<sup>N-H</sup></b>  | 2.085<br>(0.366)           | -1.026                            | 0.985                 | <b>2GeInt<sup>N-H</sup></b>  | 2.304<br>(0.303)           | -1.027                            | 1.010                 |
| <b>3SiInt<sup>N-H</sup></b>  | 2.097<br>(0.356)           | -1.024                            | 1.016                 | <b>3GeInt<sup>N-H</sup></b>  | 2.349<br>(0.289)           | -1.023                            | 1.031                 |
| <b>4SiInt<sup>N-H</sup></b>  | 2.137<br>(0.335)           | -1.031                            | 1.040                 | <b>4GeInt<sup>N-H</sup></b>  | 2.369<br>(0.281)           | -1.025                            | 1.040                 |
| <b>5SiInt<sup>N-H</sup></b>  | 2.087<br>(0.371)           | -1.029                            | 1.009                 | <b>5GeInt<sup>N-H</sup></b>  | 2.317<br>(0.311)           | -1.030                            | 1.040                 |
| <b>14SiInt<sup>N-H</sup></b> | 2.097<br>(0.360)           | -1.013                            | 0.935                 | <b>14GeInt<sup>N-H</sup></b> | 2.310<br>(0.282)           | -1.023                            | 0.987                 |
| <b>IIa-Int<sup>N-H</sup></b> | 2.141<br>(0.335)           | -1.027                            | 1.092                 |                              |                            |                                   |                       |

**Table S5** Calculated important geometrical parameters and natural charges at the nitrogen atom of the pseudo amide fragment ( $q_{\text{NH}_2}$ ) and hydrogen atom ( $q_{\text{H}}$ ) of the transition states involved in the activation of N-H bond of  $\text{NH}_3$  by CAASis (**1Si-5Si**, **8Si-9Si** and **14Si**), CAAGes (**1Ge-5Ge**, **8Ge-9Ge** and **14Ge**) and NacNacSi (**IIa**). Bond lengths (E – X, E = Si, Ge and X = N, C), bond angles ( $\angle\text{C-E-N}$ ) are given in Å and in degree ( $^\circ$ ) respectively.

| Molecule                    | $\text{H}_2\text{N} - \text{H}$ | E – H | E – $\text{NH}_2$ | E - X       | $\angle\text{C-E-N}$ | $q_{\text{NH}_2}$ | $q_{\text{H}}$ |
|-----------------------------|---------------------------------|-------|-------------------|-------------|----------------------|-------------------|----------------|
| <b>1SiTS<sup>N-H</sup></b>  | 1.364                           | 1.638 | 1.898             | 1.761/1.892 | 94.5                 | -1.250            | 0.226          |
| <b>2SiTS<sup>N-H</sup></b>  | 1.371                           | 1.636 | 1.881             | 1.781/1.889 | 92.7                 | -1.244            | 0.226          |
| <b>3SiTS<sup>N-H</sup></b>  | 1.336                           | 1.652 | 1.881             | 1.766/1.888 | 96.1                 | -1.238            | 0.231          |
| <b>4SiTS<sup>N-H</sup></b>  | 1.356                           | 1.641 | 1.913             | 1.739/1.905 | 100.2                | -1.258            | 0.222          |
| <b>5SiTS<sup>N-H</sup></b>  | 1.373                           | 1.628 | 1.871             | 1.778/1.892 | 93.2                 | -1.203            | 0.231          |
| <b>8SiTS<sup>N-H</sup></b>  | 1.368                           | 1.640 | 1.896             | 1.776/1.811 | 93.2                 | -1.242            | 0.197          |
| <b>9SiTS<sup>N-H</sup></b>  | 1.377                           | 1.644 | 1.889             | 1.791/1.824 | 91.4                 | -1.238            | 0.189          |
| <b>14SiTS<sup>N-H</sup></b> | 1.369                           | 1.638 | 1.890             | 1.772/1.821 | 94.3                 | -1.234            | 0.207          |
| <b>IIa-TS<sup>N-H</sup></b> | 1.382                           | 1.632 | 1.865             | 1.740/1.758 | 101.9                | -1.237            | 0.212          |
| <b>1GeTS<sup>N-H</sup></b>  | 1.490                           | 1.648 | 2.014             | 1.889/1.982 | 90.8                 | -1.242            | 0.166          |
| <b>2GeTS<sup>N-H</sup></b>  | 1.520                           | 1.632 | 2.015             | 1.891/1.985 | 90.3                 | -1.237            | 0.160          |
| <b>3GeTS<sup>N-H</sup></b>  | 1.514                           | 1.636 | 2.012             | 1.878/1.981 | 93.1                 | -1.234            | 0.160          |
| <b>4GeTS<sup>N-H</sup></b>  | 1.518                           | 1.634 | 2.032             | 1.867/1.998 | 98.1                 | -1.240            | 0.157          |
| <b>5GeTS<sup>N-H</sup></b>  | 1.513                           | 1.637 | 1.993             | 1.890/1.987 | 90.4                 | -1.229            | 0.165          |
| <b>8GeTS<sup>N-H</sup></b>  | 1.511                           | 1.634 | 2.062             | 1.887/1.883 | 90.0                 | -1.257            | 0.142          |
| <b>9GeTS<sup>N-H</sup></b>  | 1.515                           | 1.649 | 2.046             | 1.899/1.898 | 88.5                 | -1.254            | 0.136          |
| <b>14GeTS<sup>N-H</sup></b> | 1.494                           | 1.647 | 2.014             | 1.886/1.899 | 91.8                 | -1.247            | 0.151          |

**Table S6** Calculated important geometrical parameters and natural charges at the carbon atom of the PhCH<sub>2</sub> fragment ( $q_{\text{PhCH}_2}$ ) and hydrogen atom ( $q_{\text{H}}$ ) and occupancies of the formally vacant p-orbital ( $\text{Occ}_{\text{Si/Ge}}$ ) of the transition states involved in the activation of toluene by CAASis (**1Si-5Si**, **8Si-9Si** and **14Si**) and CAAGes (**1Ge-5Ge**, **8Ge-9Ge** and **14Ge**). Bond lengths (E – X, E = Si, Ge and X = N, C), bond angles ( $\angle\text{C-E-N}$ ) are given in Å and in degree (°) respectively.

| Molecule                    | PhCH <sub>2</sub> – H | E – H | E – CH <sub>2</sub> Ph | E - X       | $\angle\text{C-E-N}$ | $\text{Occ}_{\text{Si/Ge}}$ | $q_{\text{PhCH}_2}$ | $q_{\text{H}}$ |
|-----------------------------|-----------------------|-------|------------------------|-------------|----------------------|-----------------------------|---------------------|----------------|
| <b>1SiTS<sup>C-H</sup></b>  | 1.652                 | 1.595 | 2.156                  | 1.772/1.932 | 92.4                 | 0.475                       | -0.570              | 0.066          |
| <b>2SiTS<sup>C-H</sup></b>  | 1.676                 | 1.596 | 2.155                  | 1.799/1.948 | 91.7                 | 0.524                       | -0.565              | 0.075          |
| <b>3SiTS<sup>C-H</sup></b>  | 1.609                 | 1.609 | 2.136                  | 1.790/1.937 | 95.1                 | 0.359                       | -0.616              | 0.093          |
| <b>4SiTS<sup>C-H</sup></b>  | 1.622                 | 1.610 | 2.171                  | 1.772/1.954 | 100.5                | 0.431                       | -0.573              | 0.056          |
| <b>5SiTS<sup>C-H</sup></b>  | 1.654                 | 1.600 | 2.156                  | 1.803/1.933 | 92.6                 | 0.461                       | -0.562              | 0.063          |
| <b>8SiTS<sup>C-H</sup></b>  | 1.655                 | 1.626 | 2.117                  | 1.788/1.825 | 92.9                 | 0.963                       | -0.604              | 0.073          |
| <b>9SiTS<sup>C-H</sup></b>  | 1.723                 | 1.608 | 2.135                  | 1.800/1.858 | 90.9                 | 0.957                       | -0.576              | 0.066          |
| <b>14SiTS<sup>C-H</sup></b> | 1.676                 | 1.603 | 2.105                  | 1.789/1.865 | 94.5                 | 0.461                       | -0.606              | 0.087          |
| <b>1GeTS<sup>C-H</sup></b>  | 1.807                 | 1.668 | 2.239                  | 1.908/2.047 | 88.1                 | 0.503                       | -0.500              | 0.030          |
| <b>2GeTS<sup>C-H</sup></b>  | 1.860                 | 1.666 | 2.257                  | 1.936/2.065 | 87.2                 | 0.542                       | -0.481              | 0.029          |
| <b>3GeTS<sup>C-H</sup></b>  | 1.781                 | 1.689 | 2.220                  | 1.924/2.058 | 90.9                 | 0.373                       | -0.540              | 0.052          |
| <b>4GeTS<sup>C-H</sup></b>  | 1.786                 | 1.683 | 2.271                  | 1.909/2.081 | 96.3                 | 0.477                       | -0.491              | 0.020          |
| <b>5GeTS<sup>C-H</sup></b>  | 1.811                 | 1.672 | 2.242                  | 1.937/2.049 | 88.5                 | 0.491                       | -0.490              | 0.028          |
| <b>8GeTS<sup>C-H</sup></b>  | 1.795                 | 1.684 | 2.224                  | 1.933/1.954 | 90.7                 | 0.382                       | -0.496              | 0.043          |
| <b>9GeTS<sup>C-H</sup></b>  | 1.854                 | 1.669 | 2.189                  | 1.936/1.986 | 88.6                 | 0.450                       | -0.550              | 0.081          |
| <b>14GeTS<sup>C-H</sup></b> | 1.815                 | 1.712 | 2.192                  | 1.914/1.956 | 90.4                 | 0.863                       | -0.545              | 0.037          |

**Table S7** Calculated important geometrical parameters and natural charges at the silicon atom of the SiEt<sub>3</sub>H and at the central atom (E = Si, Ge) of the van der Waals complexes involved in the activation of Si-H bond of SiEt<sub>3</sub>H by CAASis (**1Si-5Si**, **8Si-9Si** and **14Si**), CAAGes (**1Ge-5Ge**, **8Ge-9Ge** and **14Ge**) and **IX**. The E-X (E = Si, Ge and X = C, N), Si – E bond lengths and ∠C – E – N bond angles (∠C-E-N, E = Si, Ge) are given in Å and in degree (°) respectively.

| Molecule                | Et <sub>3</sub> HSi – E | E - X       | ∠C-E-N | q <sub>SiEt<sub>3</sub>H</sub> | q <sub>E</sub> |
|-------------------------|-------------------------|-------------|--------|--------------------------------|----------------|
| <b>1Si<sub>v</sub></b>  | 4.198                   | 1.749/1.903 | 91.3   | 1.498                          | 1.155          |
| <b>2Si<sub>v</sub></b>  | 3.852                   | 1.775/1.904 | 89.0   | 1.516                          | 1.103          |
| <b>3Si<sub>v</sub></b>  | 4.039                   | 1.759/1.898 | 93.2   | 1.515                          | 1.192          |
| <b>4Si<sub>v</sub></b>  | 4.071                   | 1.738/1.912 | 97.0   | 1.494                          | 1.211          |
| <b>5Si<sub>v</sub></b>  | 3.822                   | 1.773/1.895 | 90.6   | 1.514                          | 1.210          |
| <b>8Si<sub>v</sub></b>  | 3.880                   | 1.787/1.796 | 89.9   | 1.477                          | 0.947          |
| <b>9Si<sub>v</sub></b>  | 4.264                   | 1.803/1.823 | 87.2   | 1.458                          | 0.777          |
| <b>14Si<sub>v</sub></b> | 3.807                   | 1.787/1.825 | 92.2   | 1.512                          | 1.035          |
| <b>IX<sub>v</sub></b>   | 4.247                   | 1.903/1.903 | 92.9   | 1.453                          | 1.246          |
| <b>1Ge<sub>v</sub></b>  | 4.259                   | 1.873/2.013 | 87.5   | 1.463                          | 1.079          |
| <b>2Ge<sub>v</sub></b>  | 3.860                   | 1.891/2.007 | 85.5   | 1.486                          | 1.002          |
| <b>3Ge<sub>v</sub></b>  | 3.924                   | 1.880/2.009 | 90.1   | 1.509                          | 1.097          |
| <b>4Ge<sub>v</sub></b>  | 3.770                   | 1.881/2.023 | 93.9   | 1.523                          | 1.095          |
| <b>5Ge<sub>v</sub></b>  | 3.844                   | 1.899/2.003 | 87.2   | 1.514                          | 1.118          |
| <b>8Ge<sub>v</sub></b>  | 4.136                   | 1.908/1.890 | 86.2   | 1.470                          | 0.907          |
| <b>9Ge<sub>v</sub></b>  | 4.205                   | 1.932/1.914 | 83.9   | 1.453                          | 0.764          |
| <b>14Ge<sub>v</sub></b> | 3.938                   | 1.916/1.912 | 88.7   | 1.487                          | 1.002          |

**Table S8** Calculated important geometrical parameters and natural charges at the silicon atom of the SiEt<sub>3</sub> fragment ( $q_{\text{SiEt}_3}$ ) and hydrogen atom ( $q_{\text{H}}$ ) of the transition states involved in the activation of Si-H bond of SiEt<sub>3</sub>H by CAASis (**1Si-5Si**, **8Si-9Si** and **14Si**), CAAGes (**1Ge-5Ge**, **8Ge-9Ge** and **14Ge**) and **IX**. Bond lengths (E – X, E = Si, Ge and X = N, C), bond angles ( $\angle\text{C-E-N}$ ) are given in Å and in degree (°) respectively.

| Molecule                      | Et <sub>3</sub> Si – H | E – H | E – SiEt <sub>3</sub> | E - X       | $\angle\text{C-E-N}$ | $q_{\text{SiEt}_3}$ | $q_{\text{H}}$ |
|-------------------------------|------------------------|-------|-----------------------|-------------|----------------------|---------------------|----------------|
| <b>1SiTS</b> <sup>Si-H</sup>  | 1.845                  | 1.659 | 2.425                 | 1.761/1.917 | 93.4                 | 1.522               | -0.186         |
| <b>2SiTS</b> <sup>Si-H</sup>  | 1.749                  | 1.693 | 2.469                 | 1.790/1.903 | 92.0                 | 1.527               | -0.178         |
| <b>3SiTS</b> <sup>Si-H</sup>  | 1.704                  | 1.768 | 2.444                 | 1.769/1.905 | 96.1                 | 1.348               | -0.259         |
| <b>4SiTS</b> <sup>Si-H</sup>  | 1.713                  | 1.734 | 2.475                 | 1.763/1.914 | 99.6                 | 1.497               | -0.189         |
| <b>5SiTS</b> <sup>Si-H</sup>  | 1.785                  | 1.669 | 2.440                 | 1.787/1.915 | 92.7                 | 1.545               | -0.177         |
| <b>8SiTS</b> <sup>Si-H</sup>  | 1.750                  | 1.773 | 2.389                 | 1.767/1.799 | 93.5                 | 1.397               | -0.184         |
| <b>9SiTS</b> <sup>Si-H</sup>  | 1.735                  | 1.810 | 2.390                 | 1.774/1.807 | 92.1                 | 1.381               | -0.195         |
| <b>14SiTS</b> <sup>Si-H</sup> | 1.714                  | 1.770 | 2.437                 | 1.773/1.822 | 94.5                 | 1.427               | -0.171         |
| <b>IX-TS</b> <sup>Si-H</sup>  | 1.624                  | 1.783 | 2.582                 | 1.942/1.950 | 96.0                 | 1.536               | -0.193         |
| <b>1GeTS</b> <sup>Si-H</sup>  | 1.794                  | 1.765 | 2.476                 | 1.896/2.007 | 90.4                 | 1.504               | -0.164         |
| <b>2GeTS</b> <sup>Si-H</sup>  | 1.929                  | 1.733 | 2.451                 | 1.909/2.001 | 89.8                 | 1.540               | -0.151         |
| <b>3GeTS</b> <sup>Si-H</sup>  | 1.799                  | 1.772 | 2.502                 | 1.898/2.001 | 91.9                 | 1.509               | -0.159         |
| <b>4GeTS</b> <sup>Si-H</sup>  | 1.831                  | 1.771 | 2.485                 | 1.891/2.012 | 97.0                 | 1.527               | -0.167         |
| <b>5GeTS</b> <sup>Si-H</sup>  | 1.863                  | 1.750 | 2.484                 | 1.910/1.989 | 89.4                 | 1.542               | -0.154         |
| <b>8GeTS</b> <sup>Si-H</sup>  | 1.839                  | 1.815 | 2.416                 | 1.893/1.892 | 89.7                 | 1.412               | -0.185         |
| <b>9GeTS</b> <sup>Si-H</sup>  | 1.902                  | 1.850 | 2.403                 | 1.888/1.903 | 89.0                 | 1.420               | -0.215         |
| <b>14GeTS</b> <sup>Si-H</sup> | 1.814                  | 1.813 | 2.446                 | 1.896/1.908 | 90.9                 | 1.453               | -0.168         |

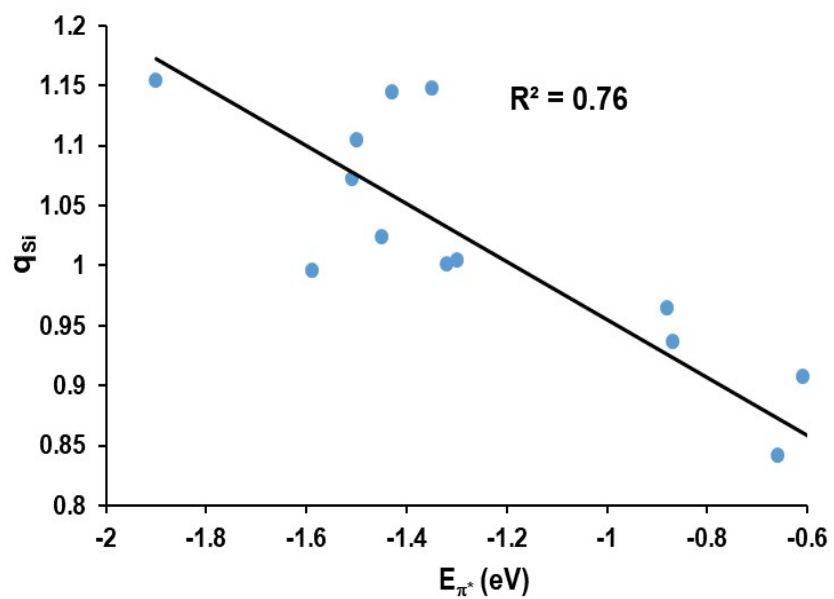

(a)

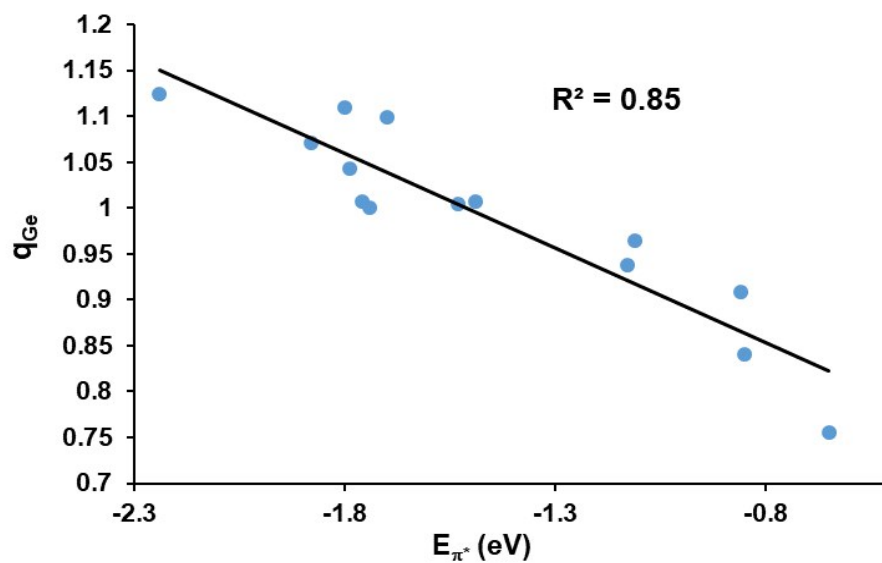

(b)

**Fig. S1** Correlation plot between  $E_{\pi^*}$  (eV) and natural charge at the central atom ( $E = \text{Si/Ge}$ ) for the (a) CAASis and (b) CAAGes.

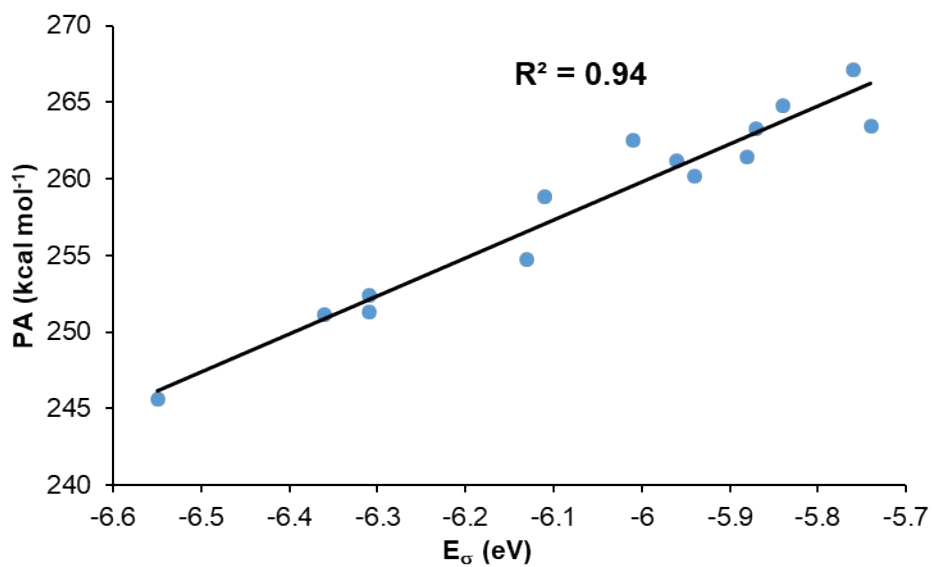

(a)

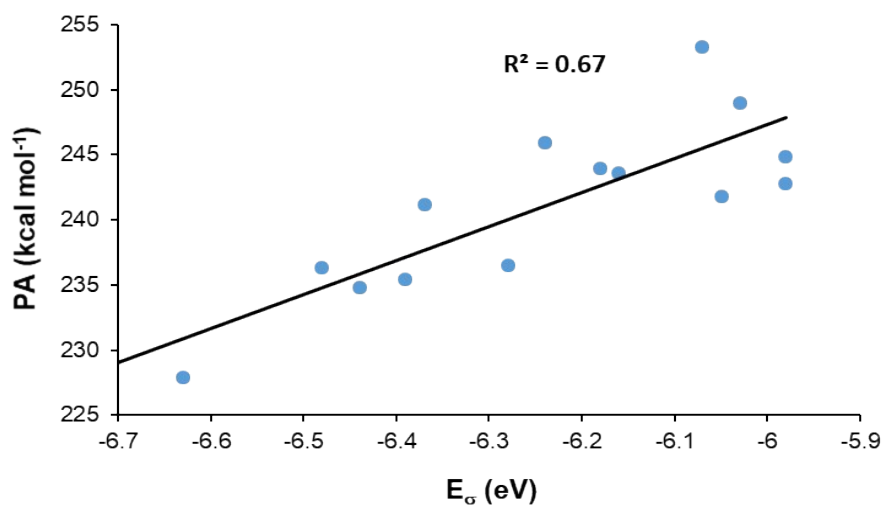

(b)

**Fig. S2** Correlation plots between the  $E_\sigma$  (eV) and PA (kcal mol<sup>-1</sup>) for (a) CAASis (1Si-14Si) and (b) CAAGes (1Ge-14Ge).

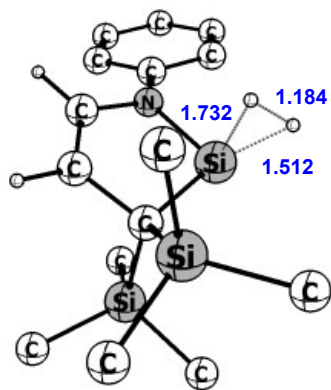

2SiTS<sup>H-H</sup>

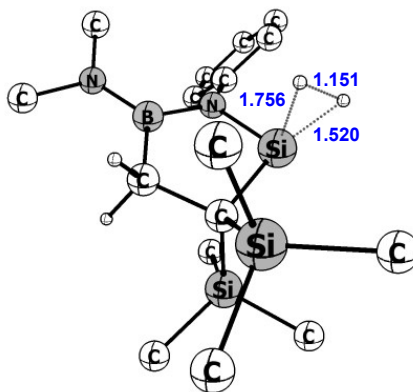

3SiTS<sup>H-H</sup>

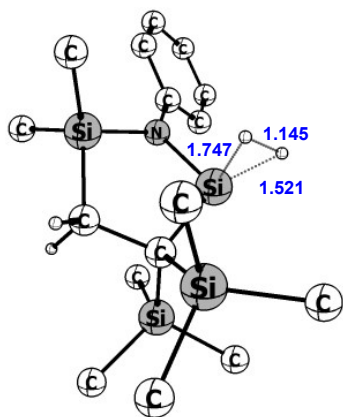

4SiTS<sup>H-H</sup>

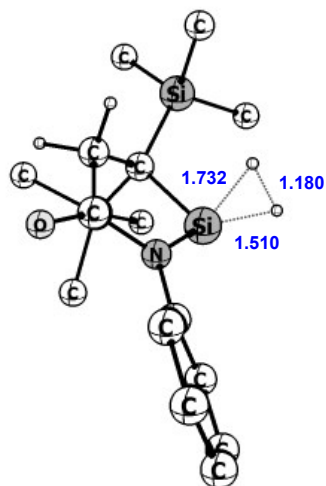

5SiTS<sup>H-H</sup>

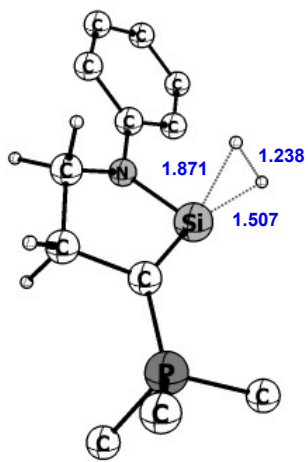

8SiTS<sup>H-H</sup>

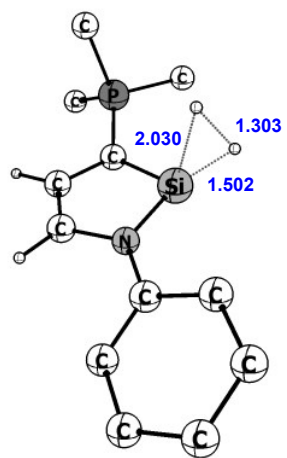

9SiTS<sup>H-H</sup>



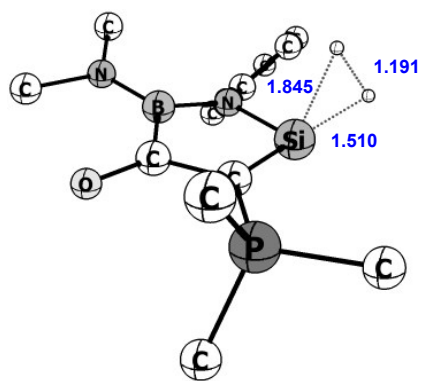

14SiTS<sup>H-H</sup>

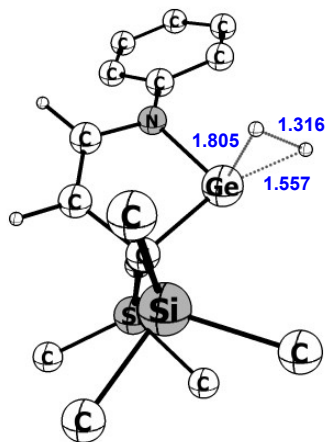

2GeTS<sup>H-H</sup>

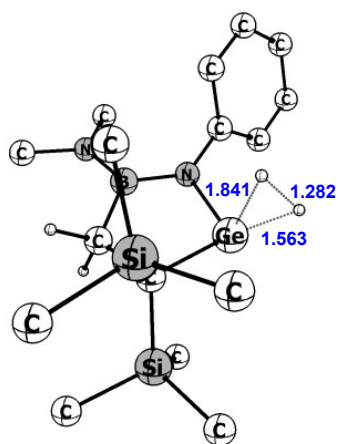

3GeTS<sup>H-H</sup>

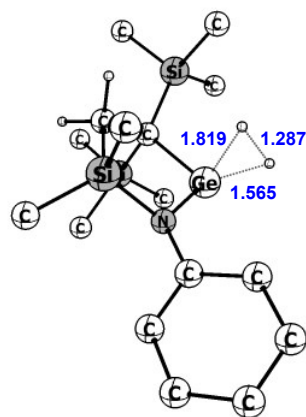

4GeTs<sup>H-H</sup>

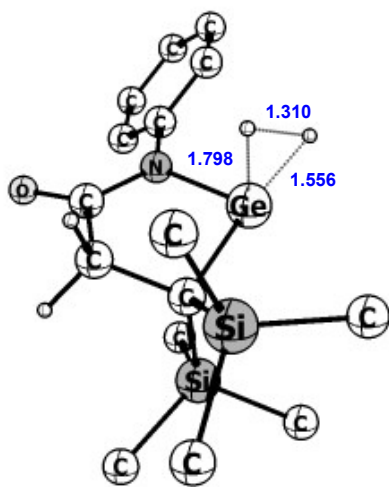

5GeTS<sup>H-H</sup>

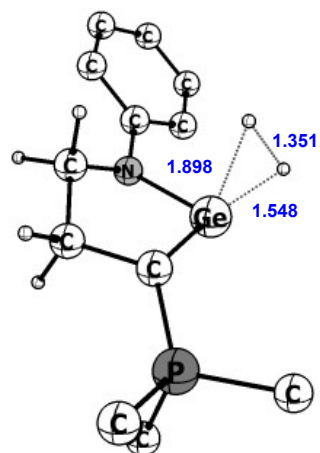

8GeTS<sup>H-H</sup>

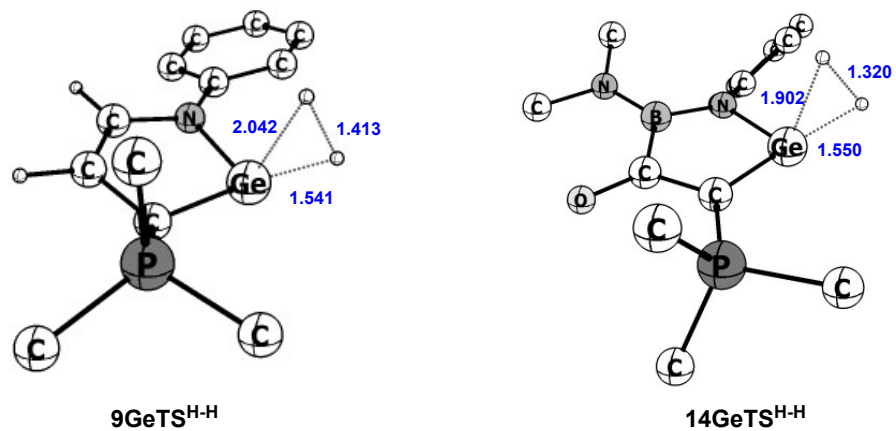

**Fig. S3** Optimized geometries for the transition states involved in the activation of dihydrogen by CAASis (2Si-5Si, 8Si-9Si and 14Si) and CAAGes (2Ge-5Ge, 8Ge-9Ge and 14Ge). The hydrogen atoms of the phenyl and methyl groups are omitted for clarity.

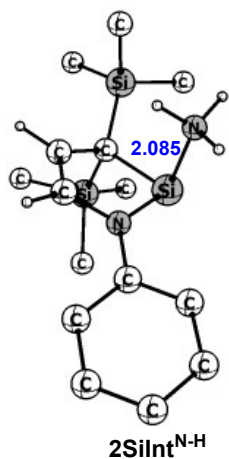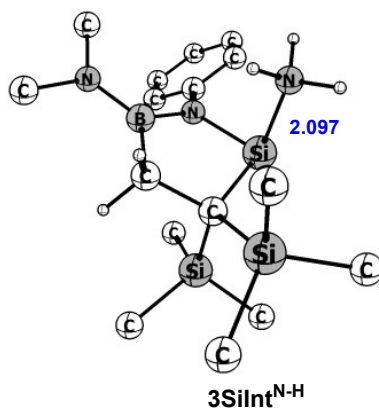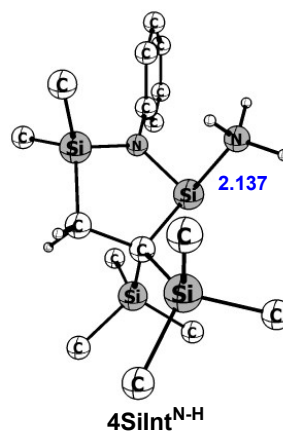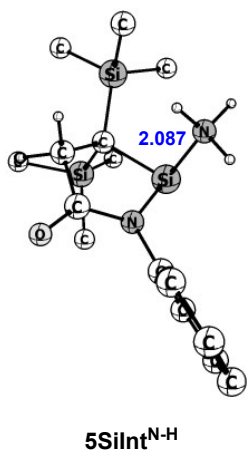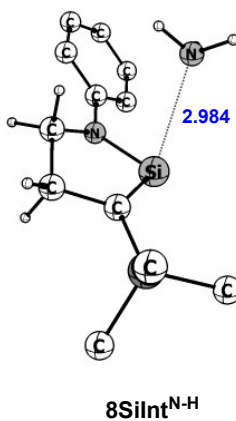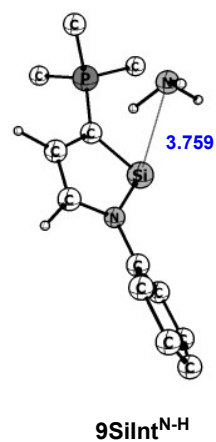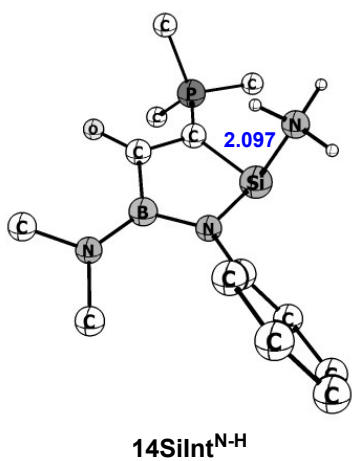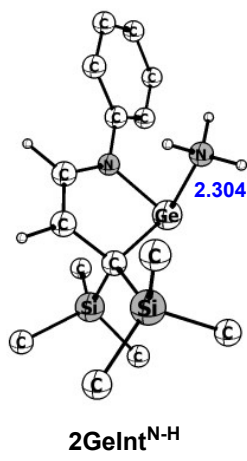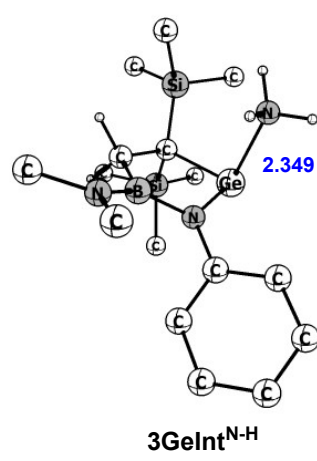

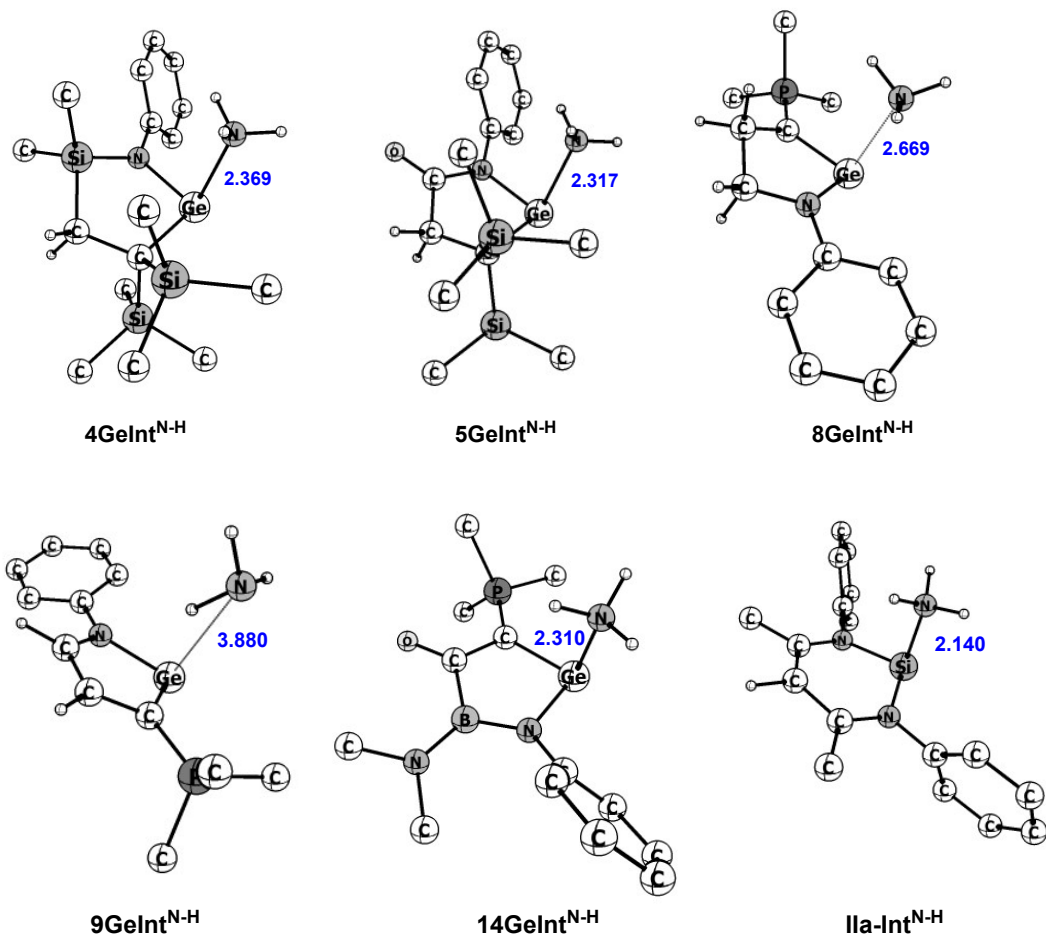

**Fig. S4** Optimized geometries for the intermediate (Int<sup>N-H</sup>) involved in the activation of N-H bond of NH<sub>3</sub> by CAASis (2Si-5Si, 8Si-9Si and 14Si), CAAGes (2Ge-5Ge, 8Ge-9Ge and 14Ge) and NacNacSi (**IIa**). The hydrogen atoms of the phenyl and methyl groups are omitted for clarity.

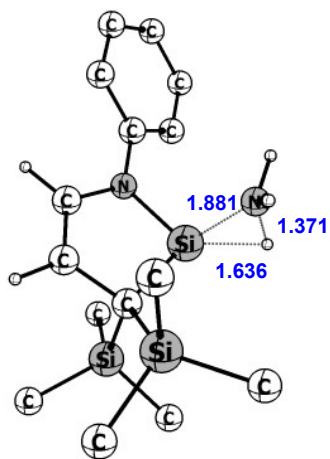

2SiTS<sup>N-H</sup>

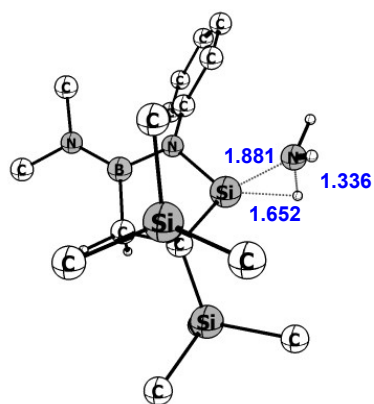

3SiTS<sup>N-H</sup>

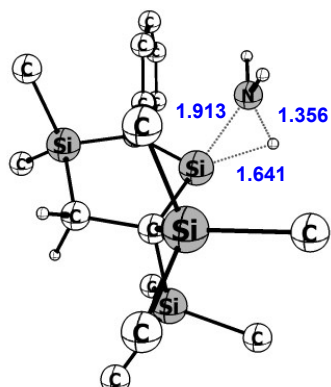

4SiTS<sup>N-H</sup>

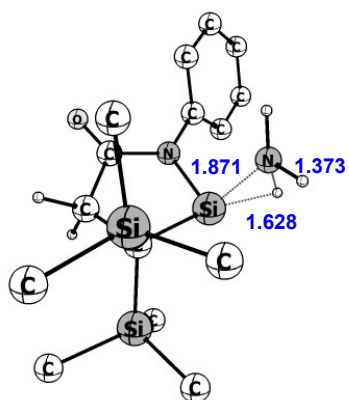

5SiTS<sup>N-H</sup>

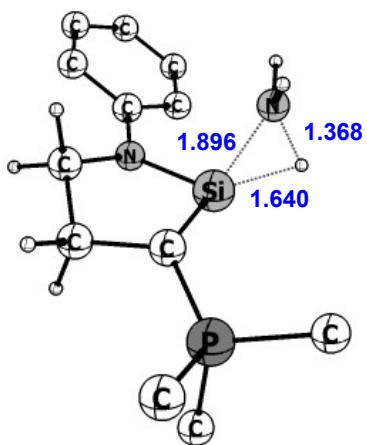

8SiTS<sup>N-H</sup>

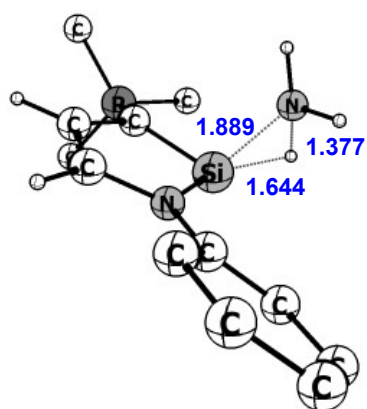

9SiTS<sup>N-H</sup>

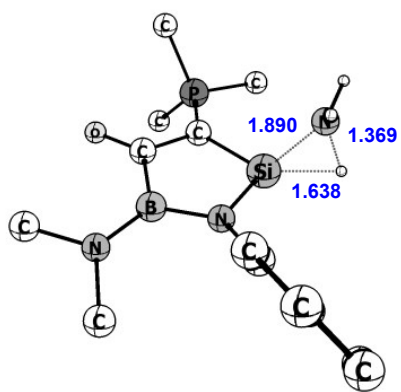

14SiTS<sup>N-H</sup>

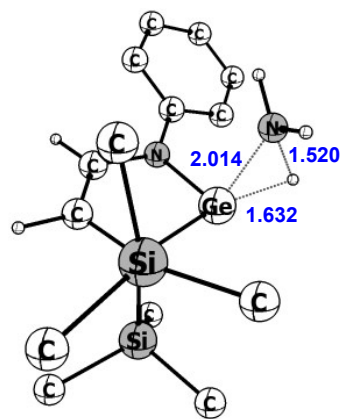

2GeTS<sup>N-H</sup>

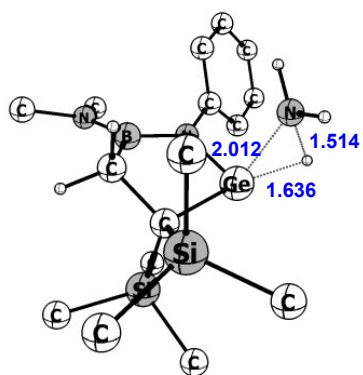

3GeTS<sup>N-H</sup>

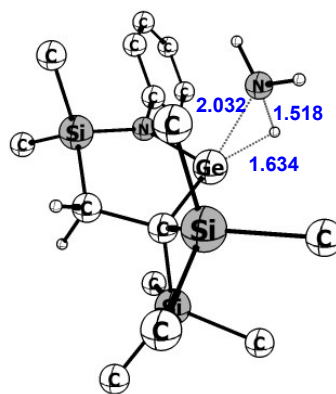

4GeTS<sup>N-H</sup>

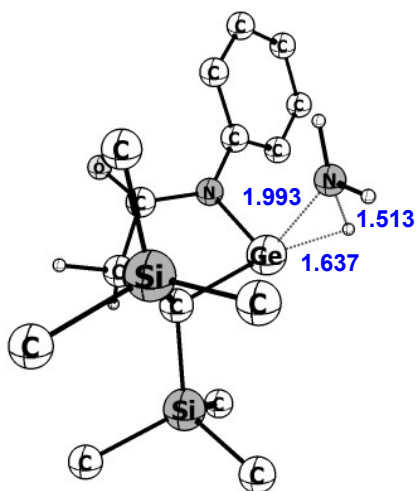

5GeTS<sup>N-H</sup>

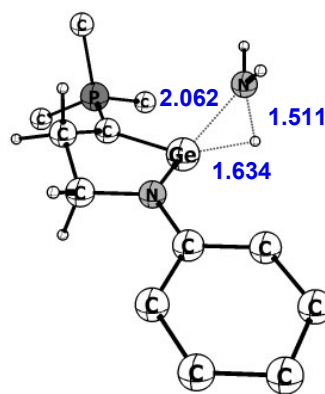

8GeTS<sup>N-H</sup>

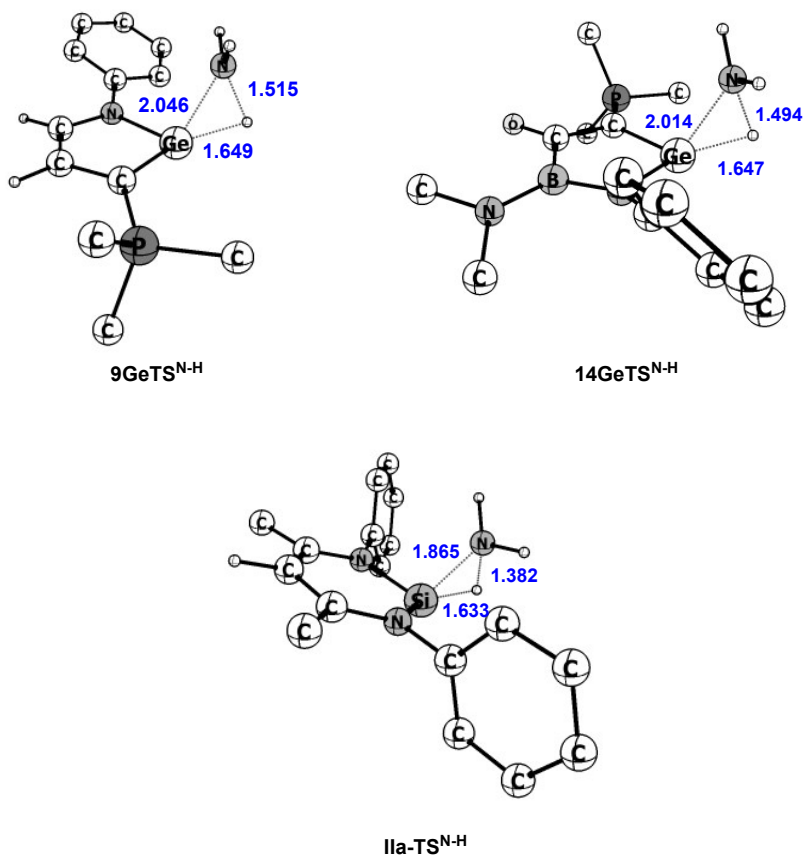

**Fig. S5** Optimized geometries for the transition states involved in the activation of N–H bond of NH<sub>3</sub> by CAASis (2Si-5Si, 8Si-9Si and 14Si), CAAGes (2Ge-5Ge, 8Ge-9Ge and 14Ge) and NacNacSi (IIa). The hydrogen atoms of the phenyl and methyl groups are omitted for clarity.

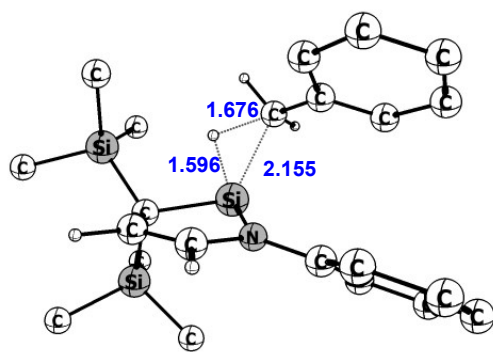

2SiTS<sup>C-H</sup>

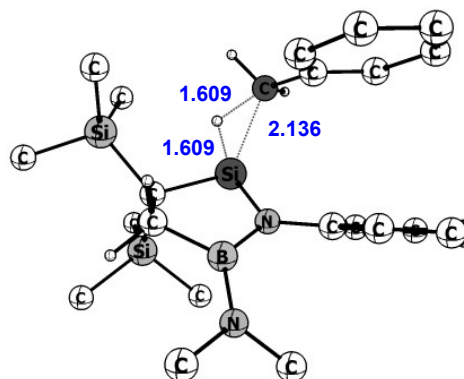

3SiTS<sup>C-H</sup>

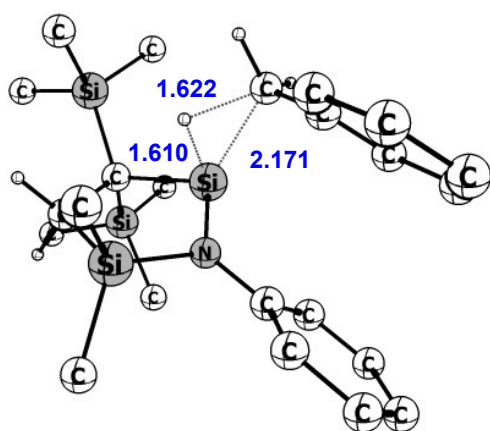

4SiTS<sup>C-H</sup>

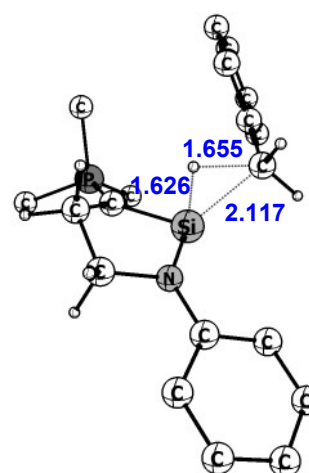

8SiTS<sup>C-H</sup>

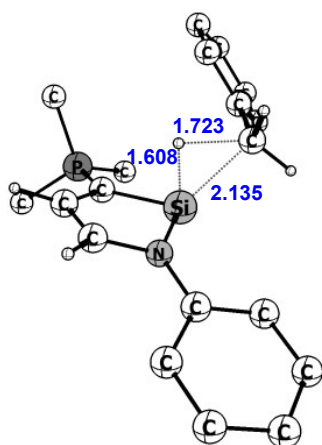

9SiTS<sup>C-H</sup>

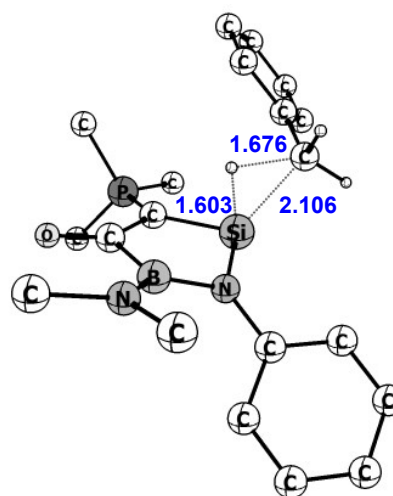

14SiTS<sup>C-H</sup>



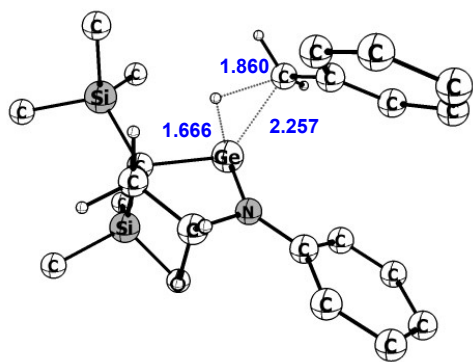

1GeTS<sup>C-H</sup>

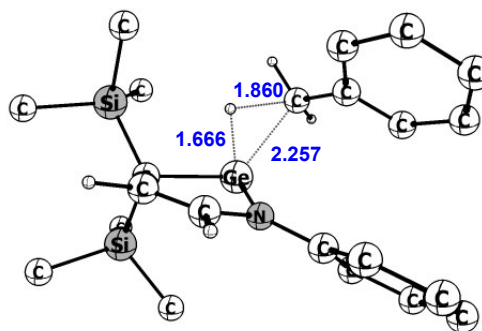

2GeTS<sup>C-H</sup>

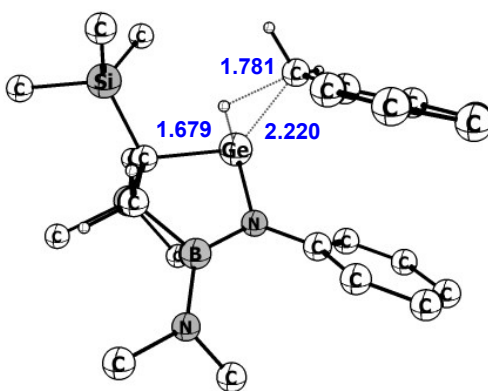

3GeTS<sup>C-H</sup>

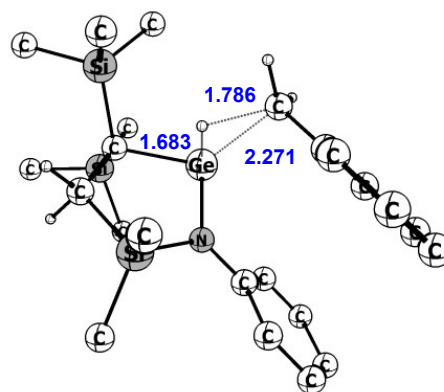

4GeTS<sup>C-H</sup>

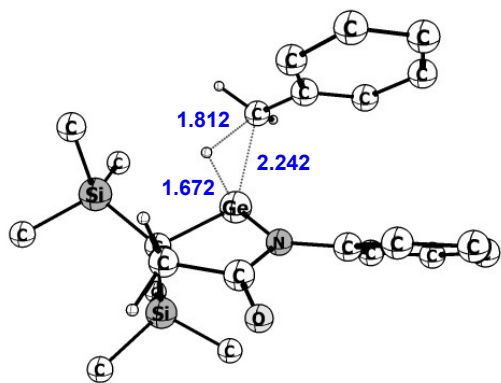

5GeTS<sup>C-H</sup>

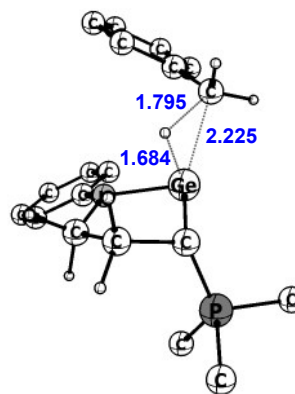

8GeTS<sup>C-H</sup>

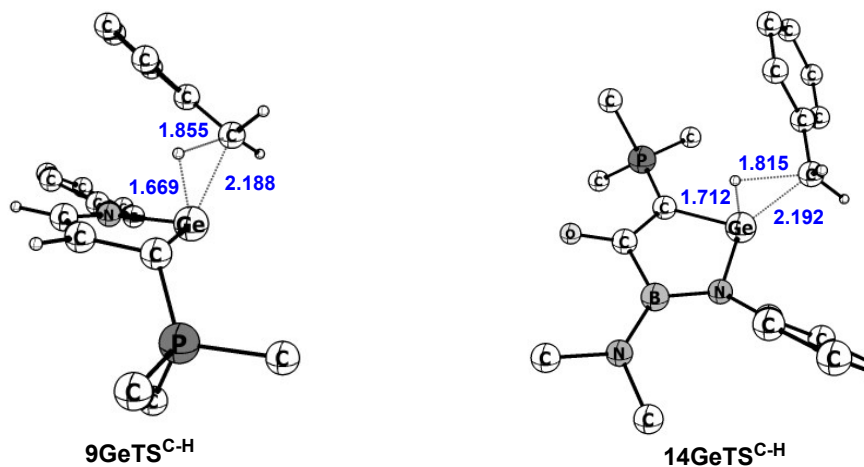

**Fig. S6** Optimized geometries for the transition states involved in the activation of C – H bond of CH<sub>3</sub>Ph by CAASis (2Si-4Si, 8Si-9Si and 14Si) and CAAGes (1Ge-5Ge, 8Ge-9Ge and 14Ge). The hydrogen atoms of the phenyl and methyl groups are omitted for clarity.

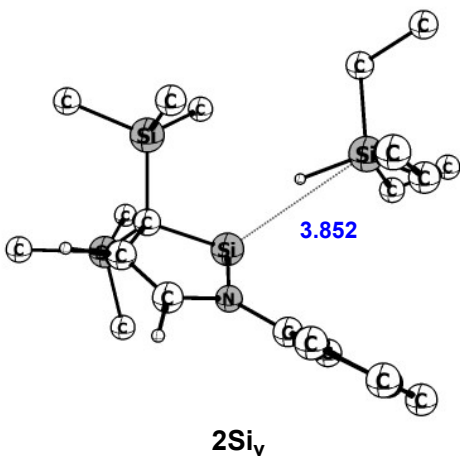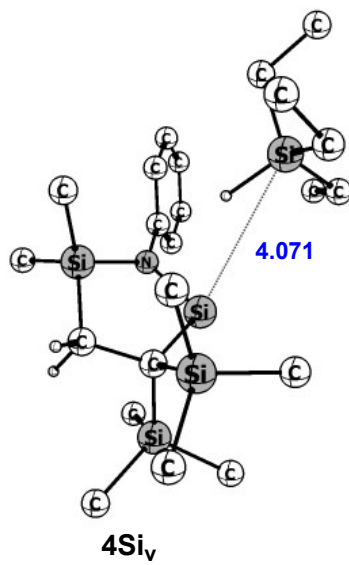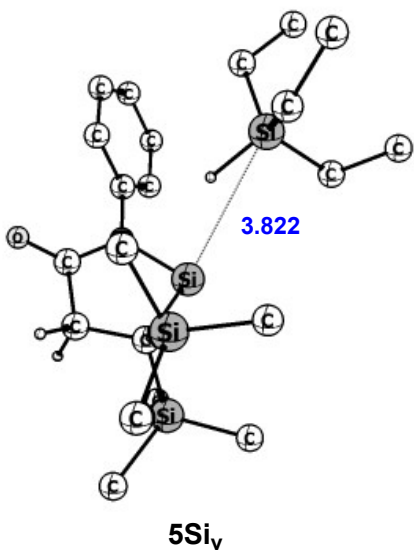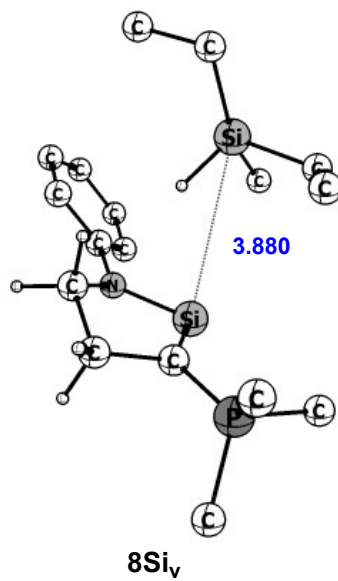

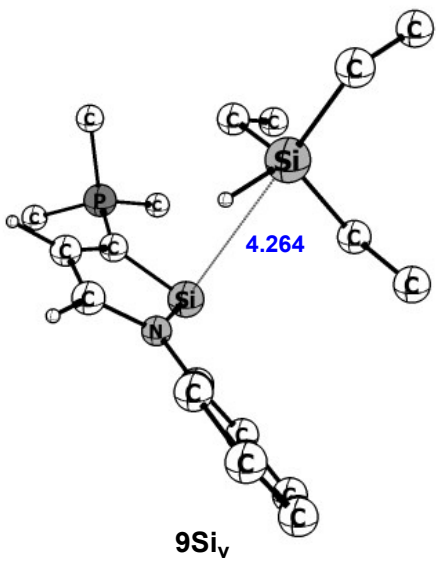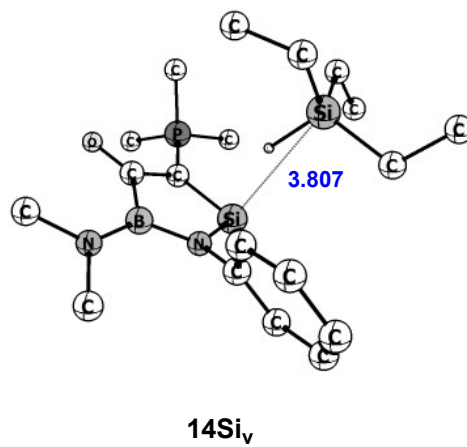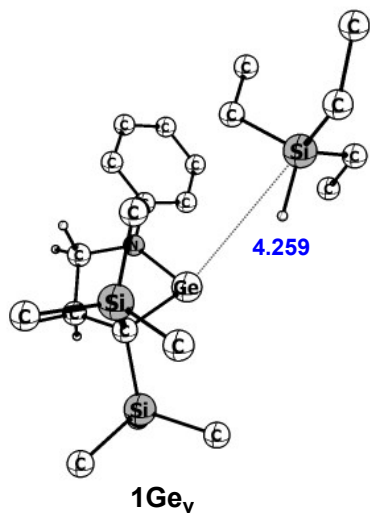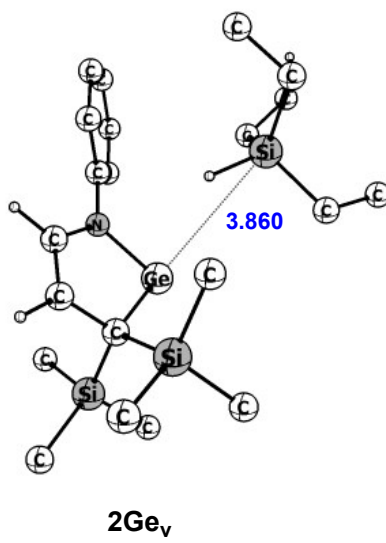

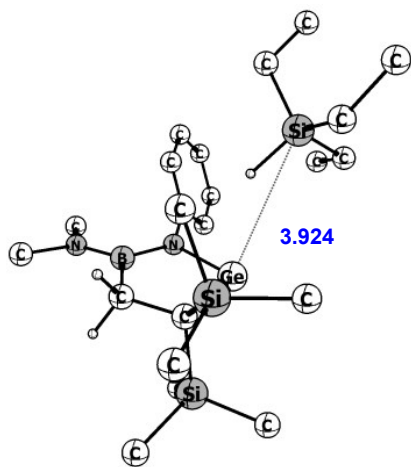

3Ge<sub>v</sub>

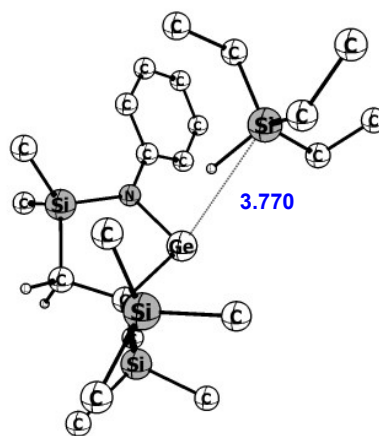

4Ge<sub>v</sub>

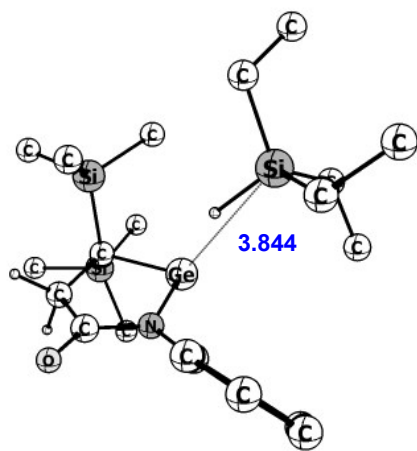

5Ge<sub>v</sub>

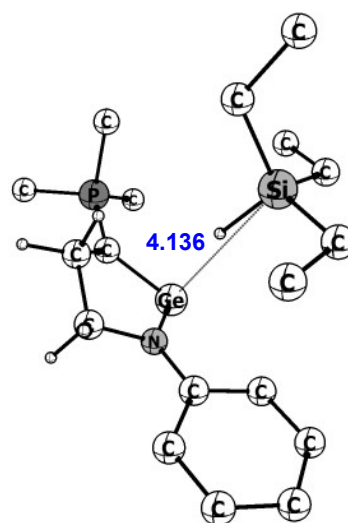

8Ge<sub>v</sub>

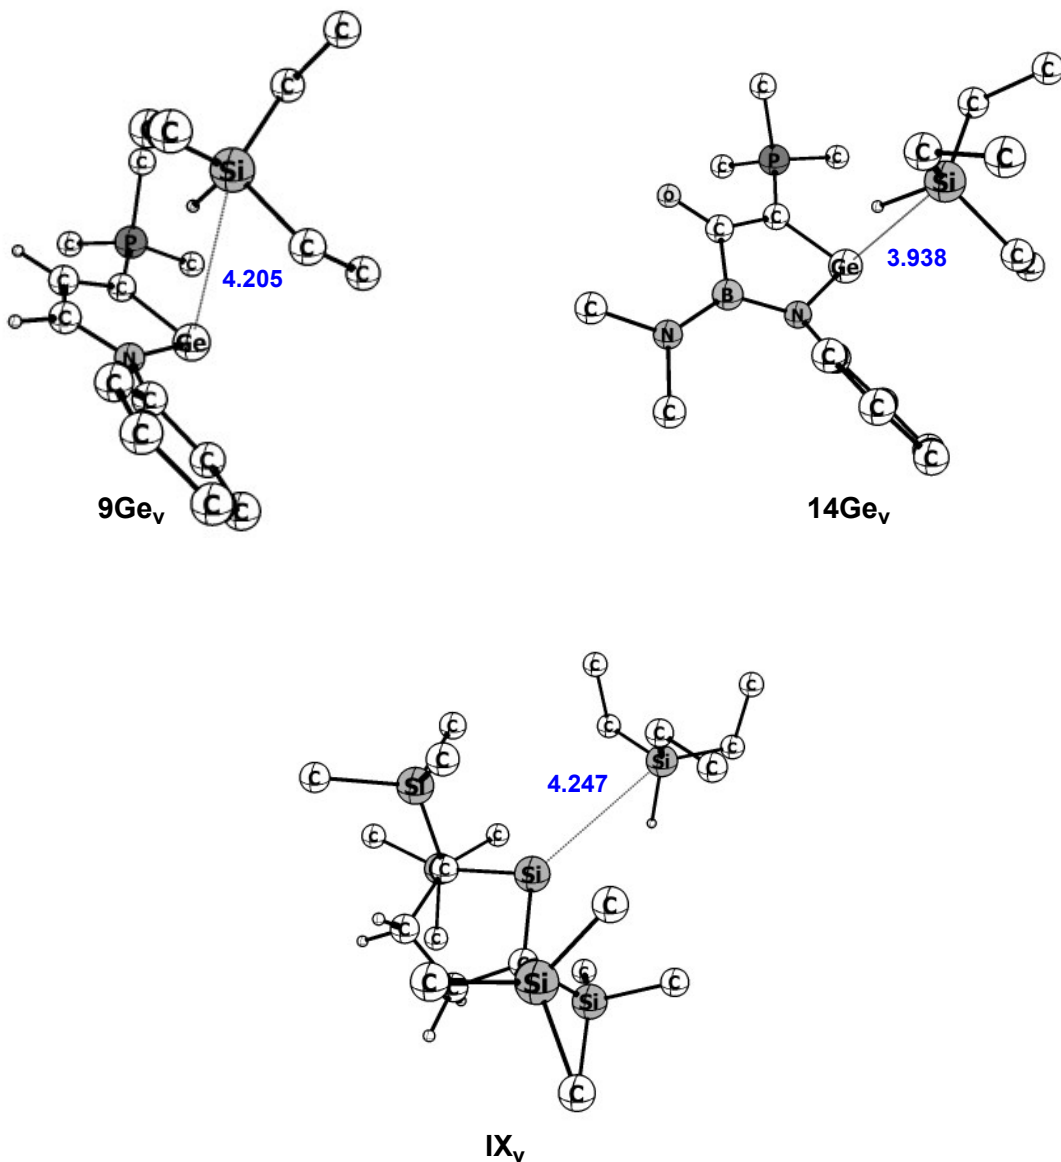

**Fig. S7** Optimized geometries for the van der Waals complexes involved in the activation of Si – H bond of SiEt<sub>3</sub>H by CAASiS (2Si-5Si, 8Si-9Si and 14Si), CAAGes (1Ge-5Ge, 8Ge-9Ge and 14Ge) and IX. The hydrogen atoms of the methyl and phenyl rings are omitted for clarity.

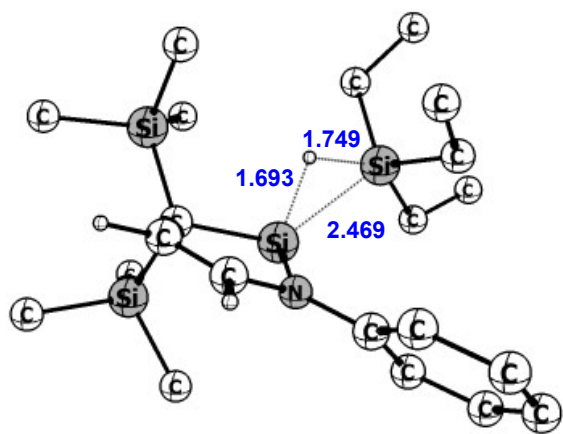

2SiTS<sup>Si-H</sup>

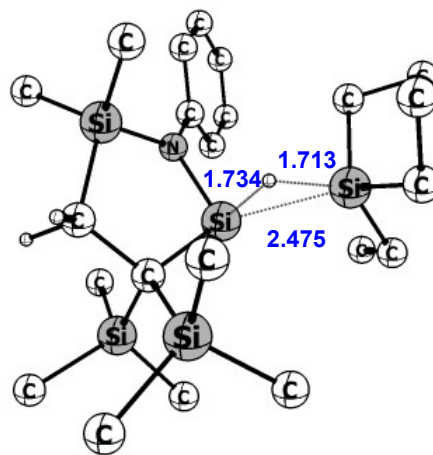

4SiTS<sup>Si-H</sup>

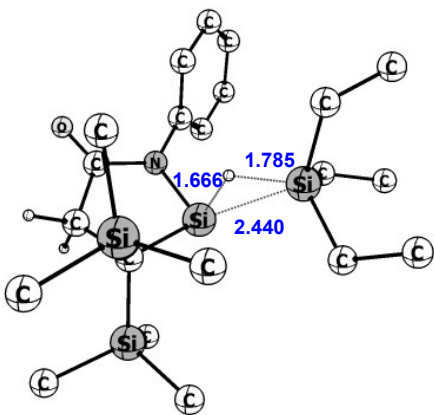

5SiTS<sup>Si-H</sup>

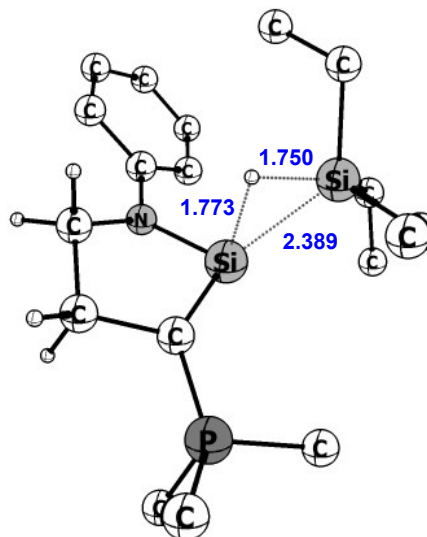

8SiTS<sup>Si-H</sup>

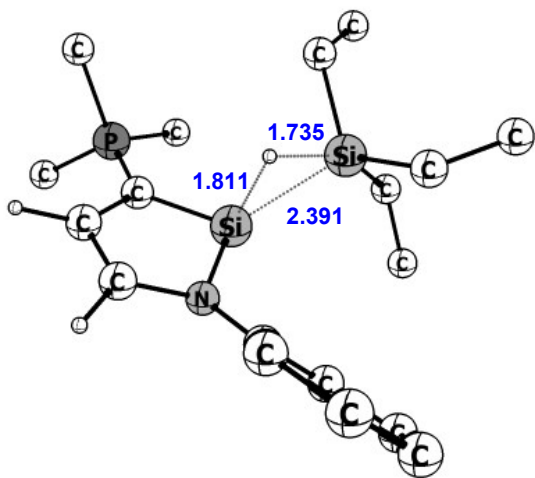

9SiTS<sup>Si-H</sup>

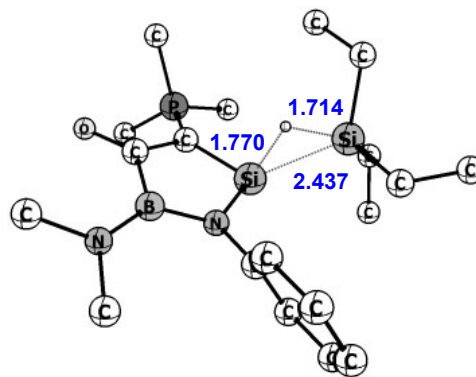

14SiTS<sup>Si-H</sup>

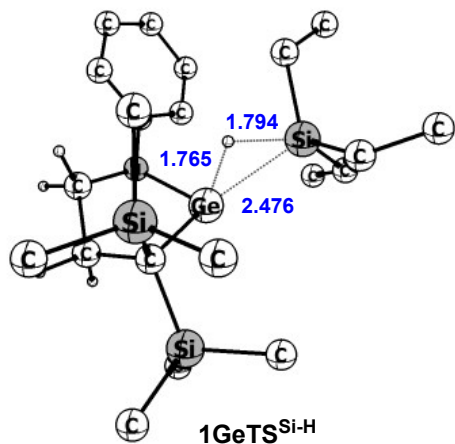

1GeTS<sup>Si-H</sup>

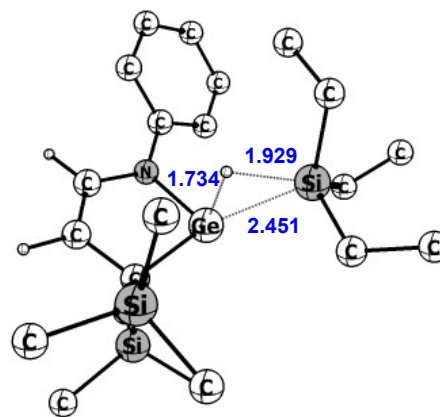

2GeTS<sup>Si-H</sup>



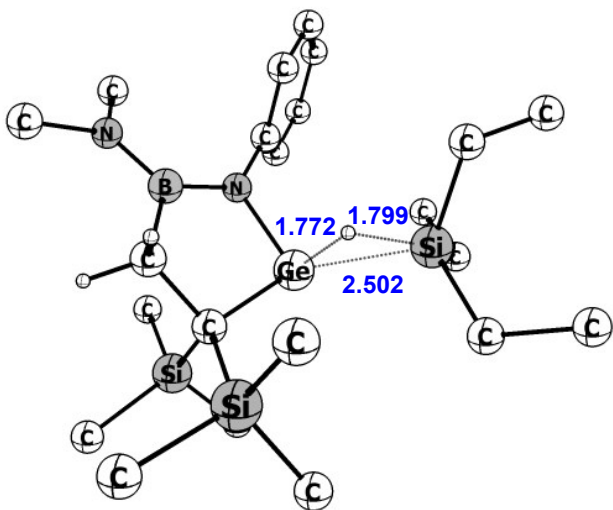

3GeTS<sup>Si-H</sup>

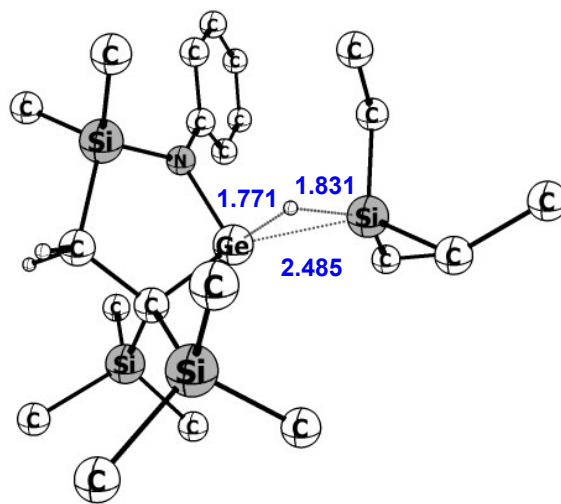

4GeTS<sup>Si-H</sup>

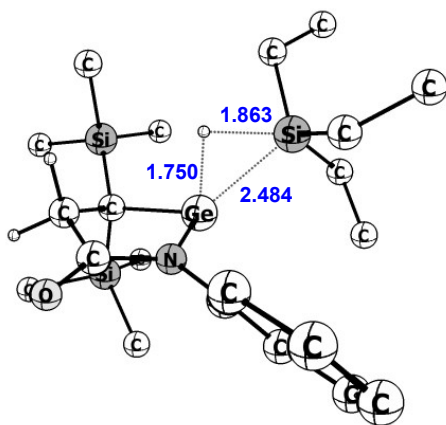

5GeTS<sup>Si-H</sup>

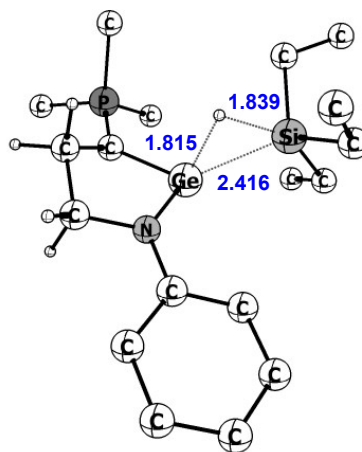

8GeTS<sup>Si-H</sup>

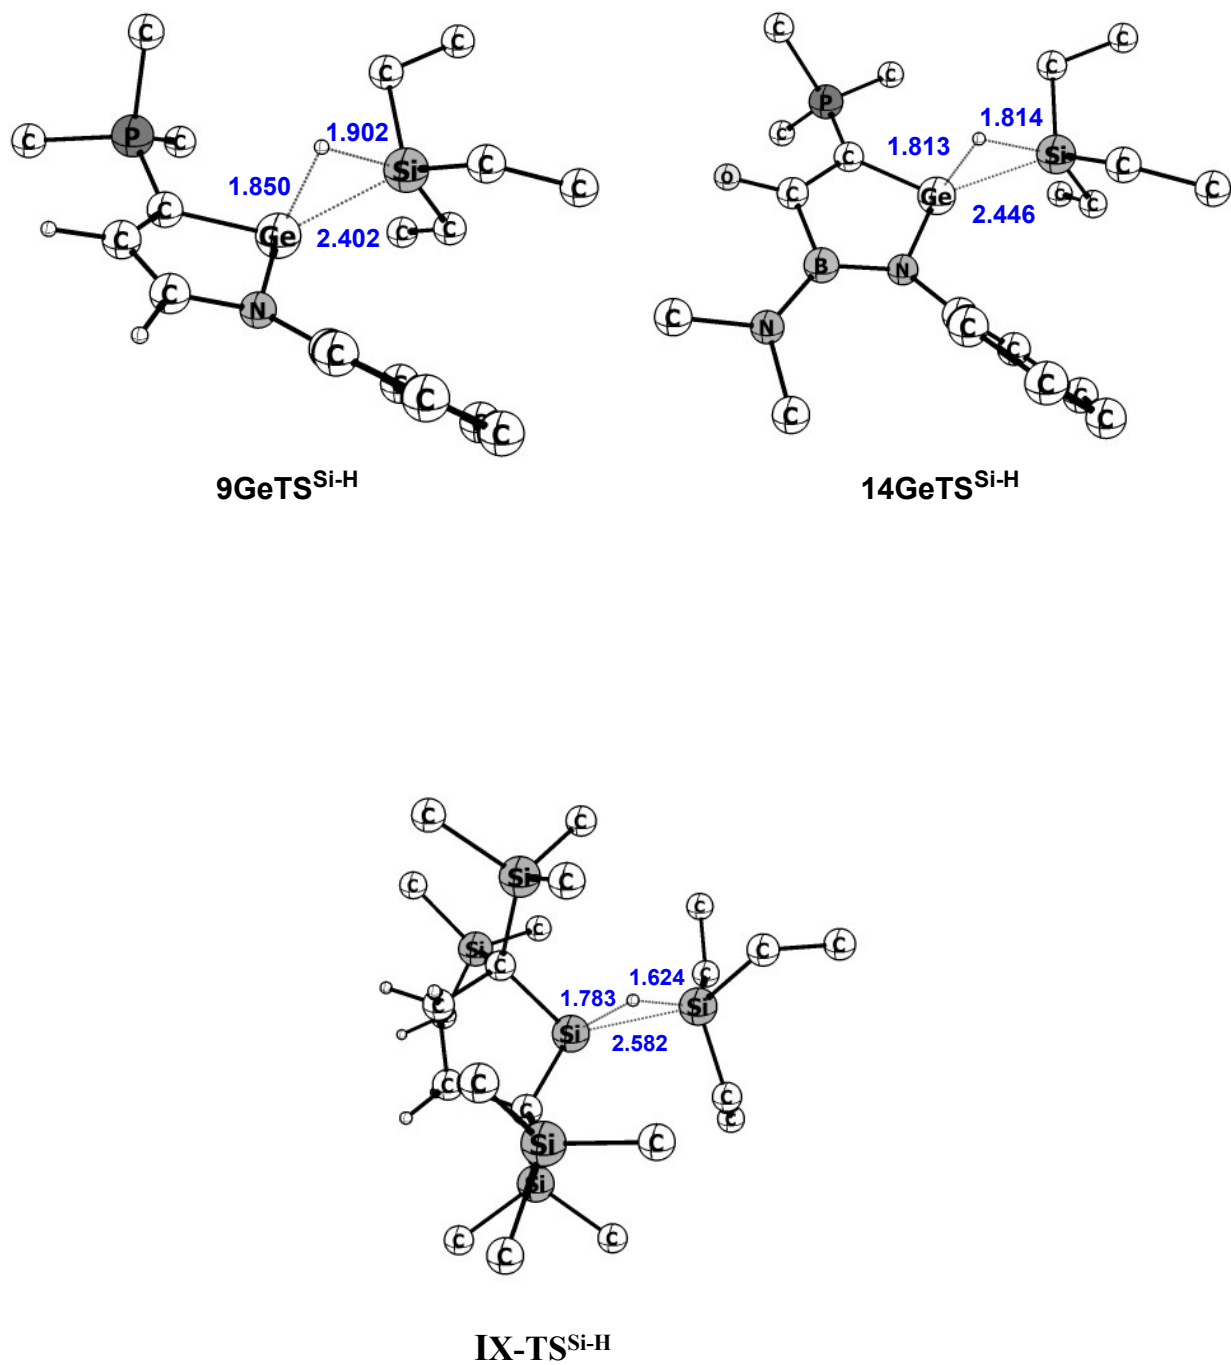

**Fig. S8** Optimized geometries for the transition states involved in the activation of Si – H bond of SiEt<sub>3</sub>H by CAASi (2Si-5Si, 8Si-9Si and 14Si), CAAGes (1Ge-5Ge, 8Ge-9Ge and 14Ge) and IX. The hydrogen atoms of the phenyl and methyl groups are omitted for clarity.

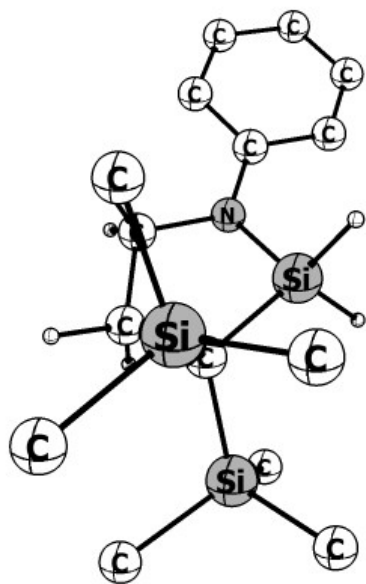

1Si<sup>PH-H</sup>

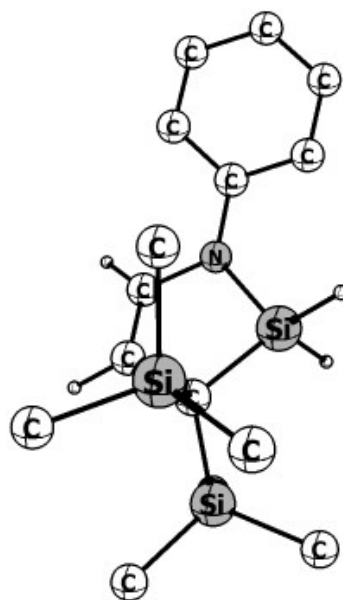

2Si<sup>PH-H</sup>

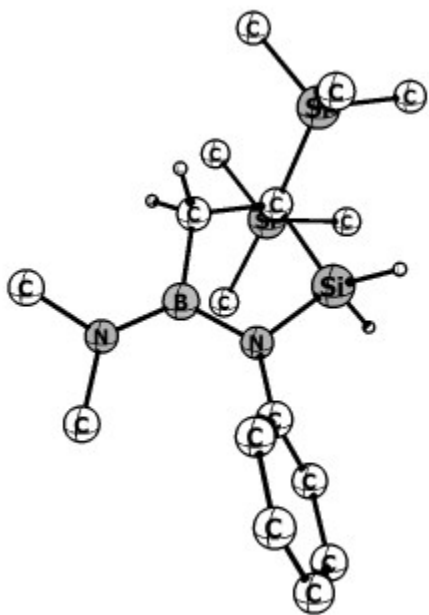

3Si<sup>PH-H</sup>

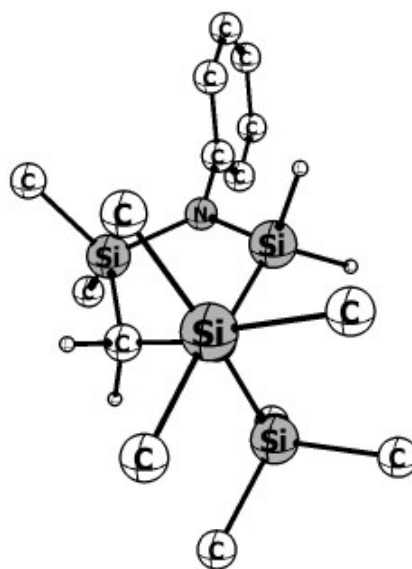

4Si<sup>PH-H</sup>

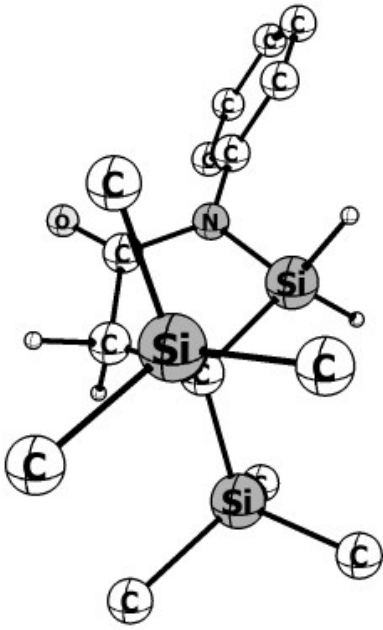

5Si<sup>H-H</sup>

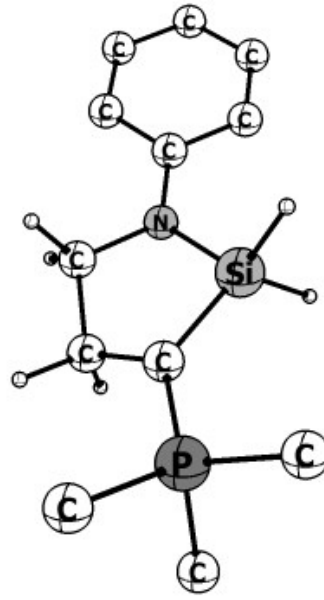

8Si<sup>H-H</sup>

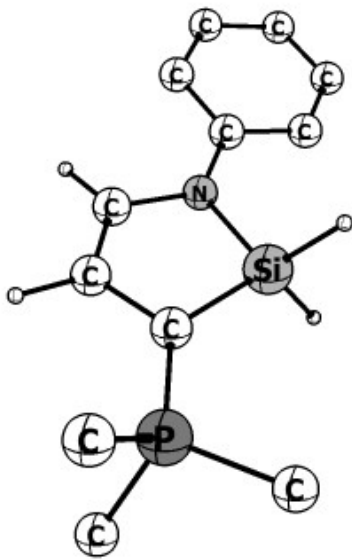

9Si<sup>H-H</sup>

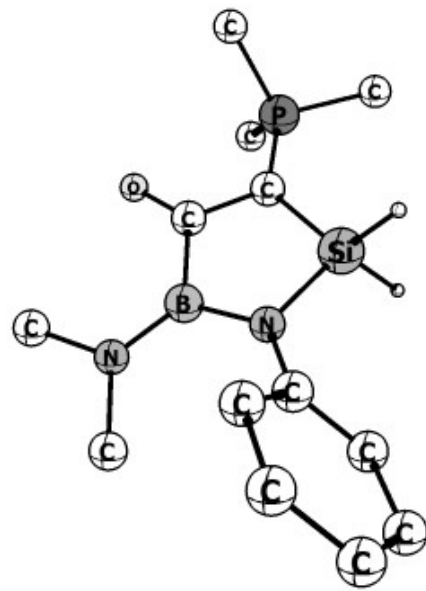

14Si<sup>H-H</sup>

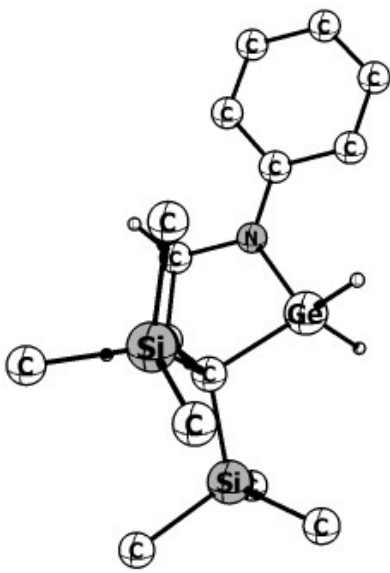

1Ge<sup>PH-H</sup>

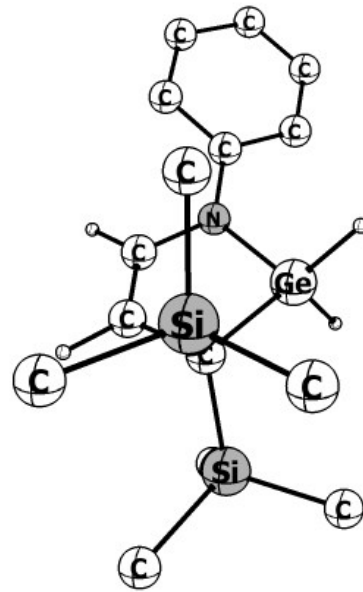

2Ge<sup>PH-H</sup>

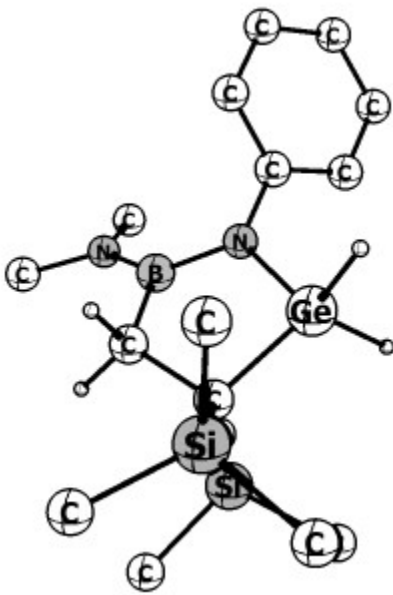

3Ge<sup>PH-H</sup>

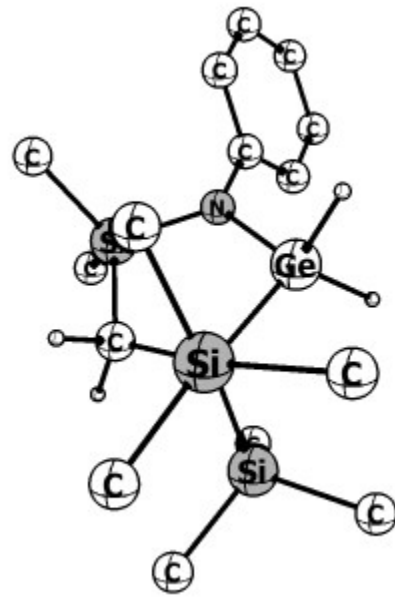

4Ge<sup>PH-H</sup>

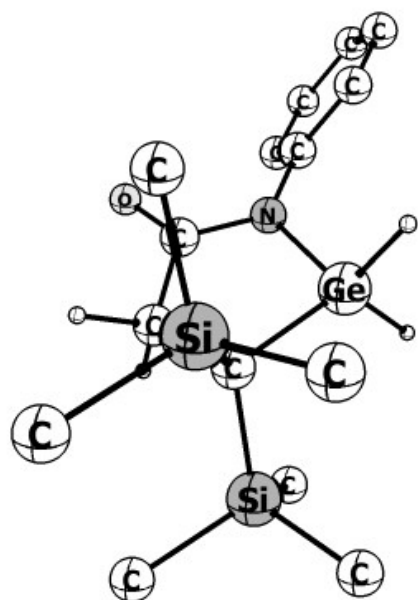

5Ge<sup>PH-H</sup>

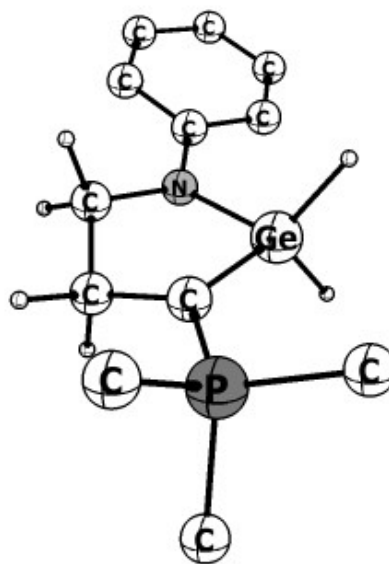

8Ge<sup>PH-H</sup>

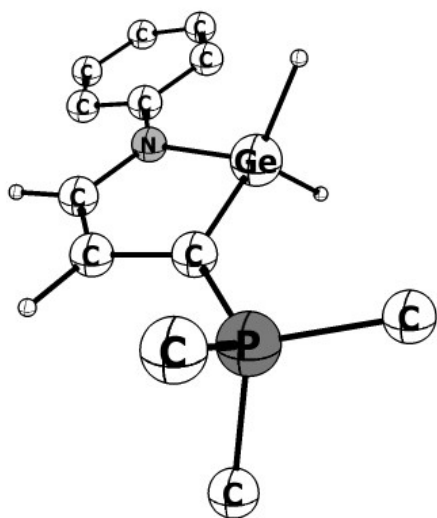

9Ge<sup>PH-H</sup>

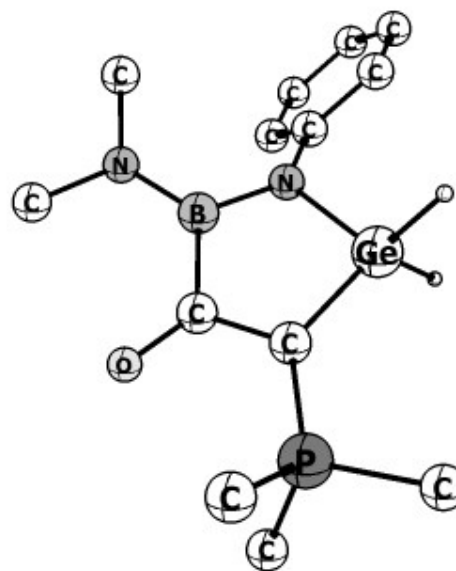

14Ge<sup>PH-H</sup>

**Fig. S9** Optimized geometries of the H-H splitting product obtained for CAASi (1Si-5Si, 8Si-9Si and 14Si) and CAAGes (1Ge-5Ge, 8Ge-9Ge and 14Ge). The hydrogen atoms of the methyl and phenyl groups are omitted for the sake of clarity.

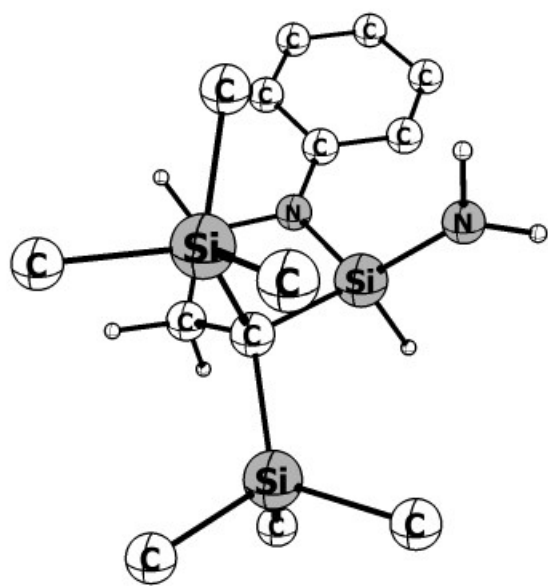

1SiP<sup>N-H</sup>

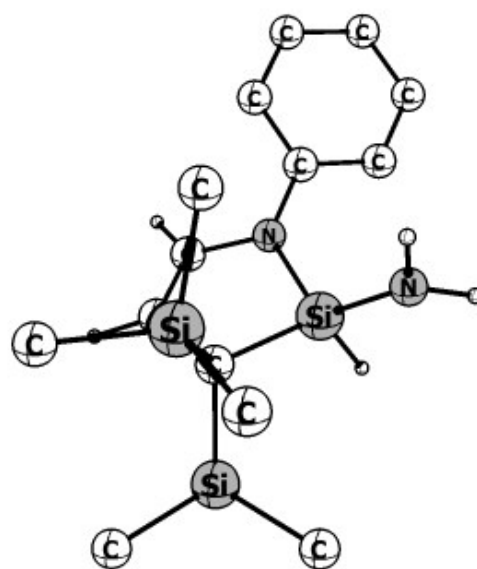

2SiP<sup>N-H</sup>

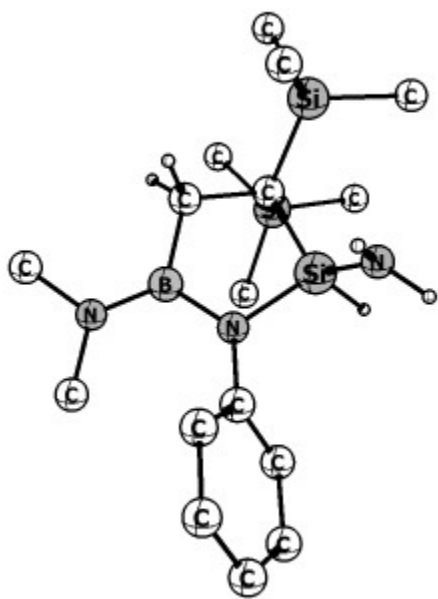

3SiP<sup>N-H</sup>

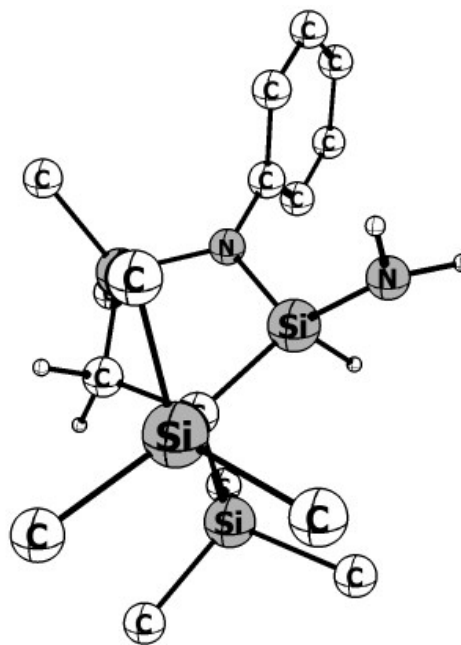

4SiP<sup>N-H</sup>

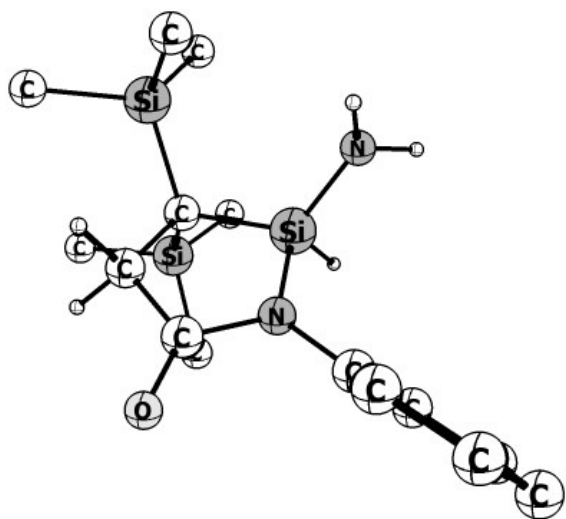

5SiP<sup>N-H</sup>

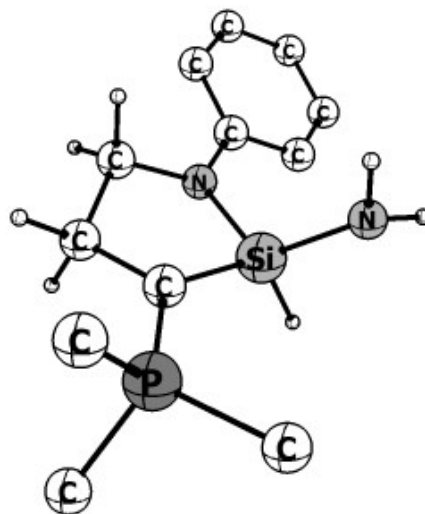

8SiP<sup>N-H</sup>

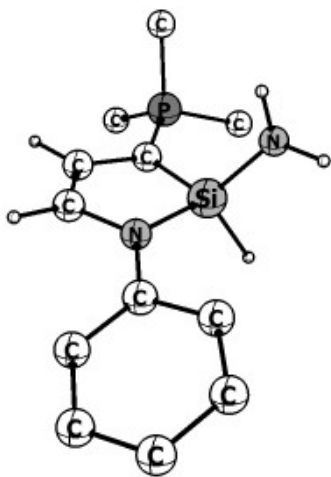

9SiP<sup>N-H</sup>

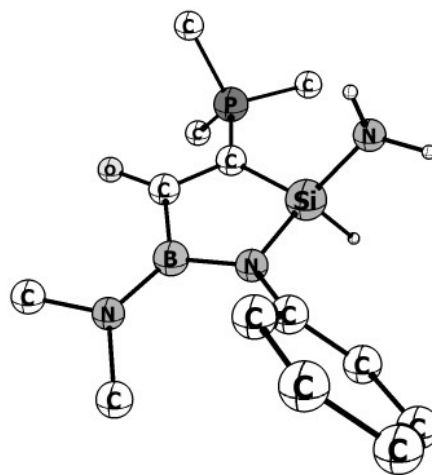

14SiP<sup>N-H</sup>



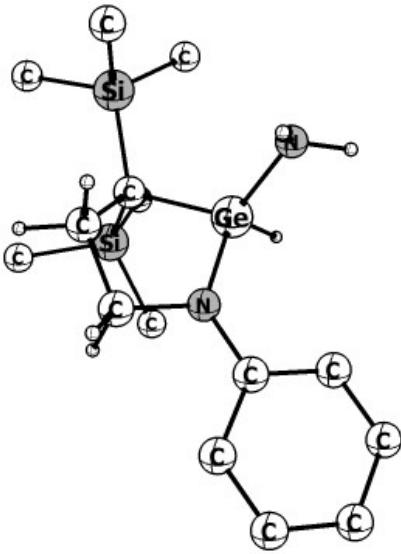

1Ge<sup>PN-H</sup>

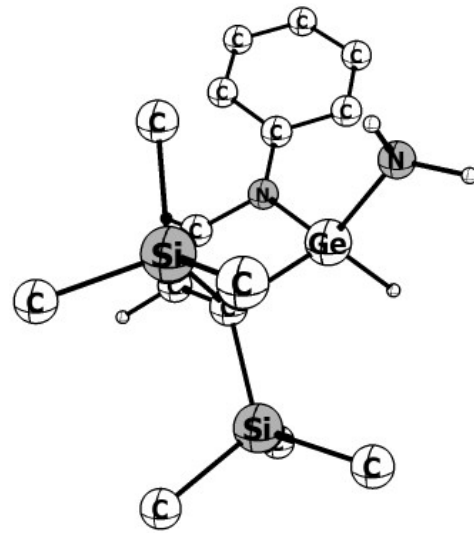

2Ge<sup>PN-H</sup>

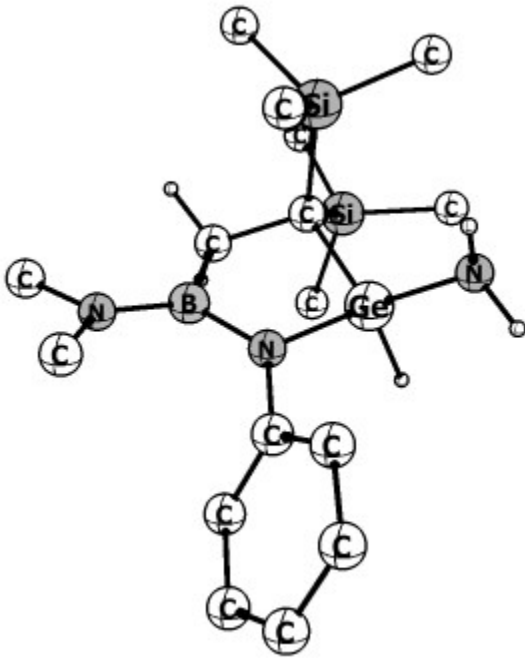

3Ge<sup>PN-H</sup>

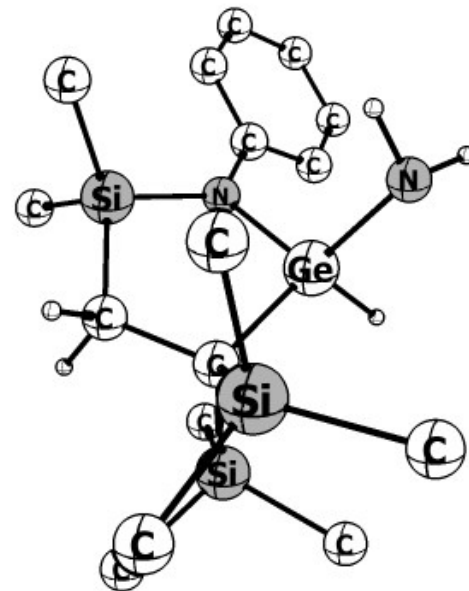

4Ge<sup>PN-H</sup>

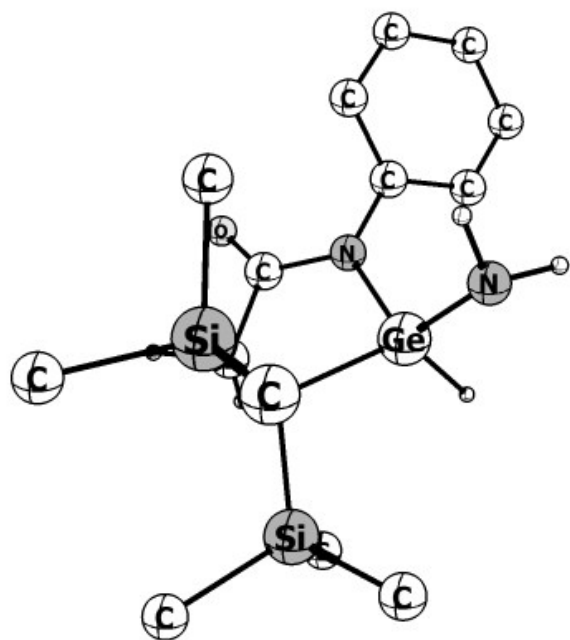

5GePN-H

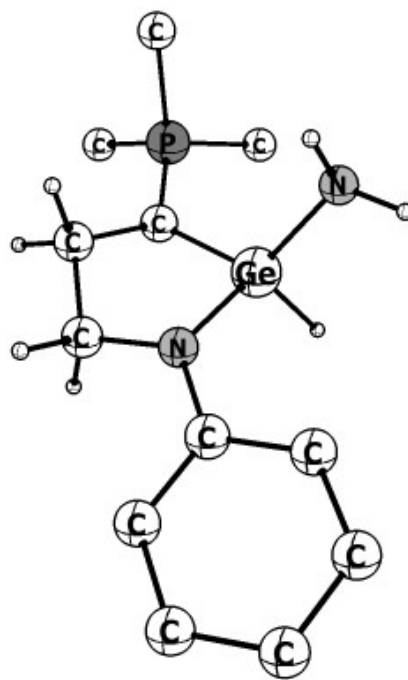

8GePN-H

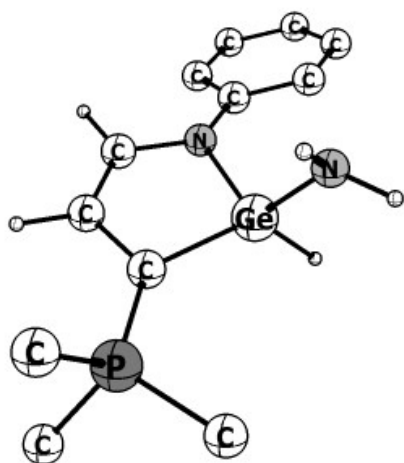

9GePN-H

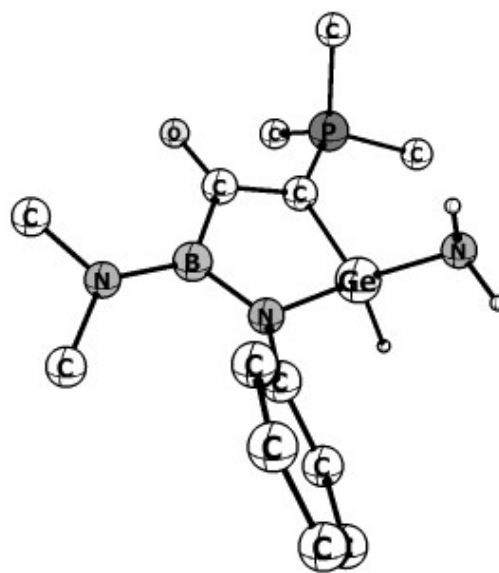

14GePN-H

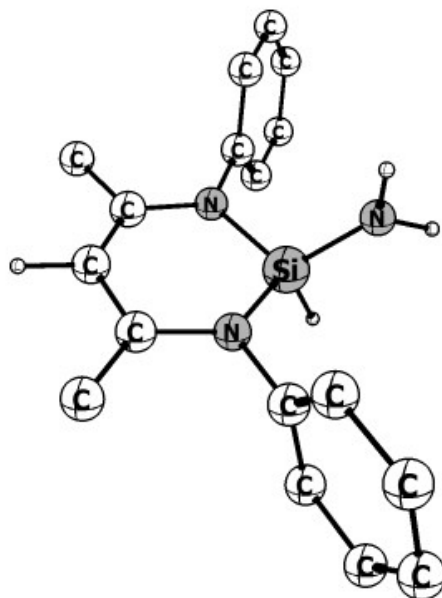

**IIa-P<sup>N-H</sup>**

**Fig. S10** Optimized geometries of the N-H splitting product obtained for CAASis (**1Si-5Si**, **8Si-9Si** and **14Si**), CAAGes (**1Ge-5Ge**, **8Ge-9Ge** and **14Ge**) and NacNacSi (**IIa**). The hydrogen atoms of the methyl and phenyl groups are omitted for the sake of clarity.

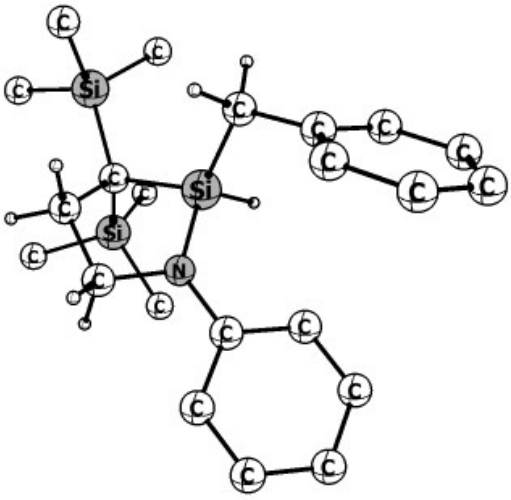

1SiPC-H

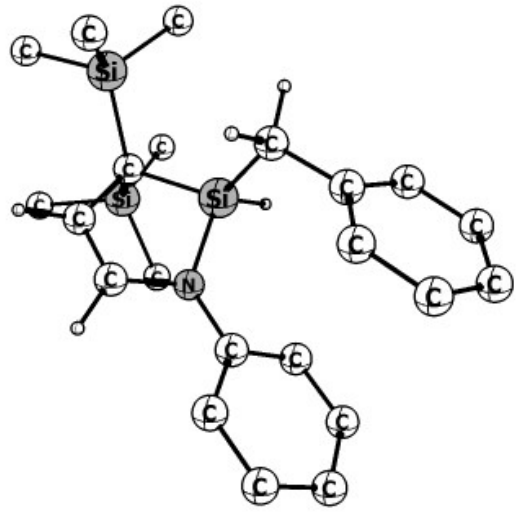

2SiPC-H

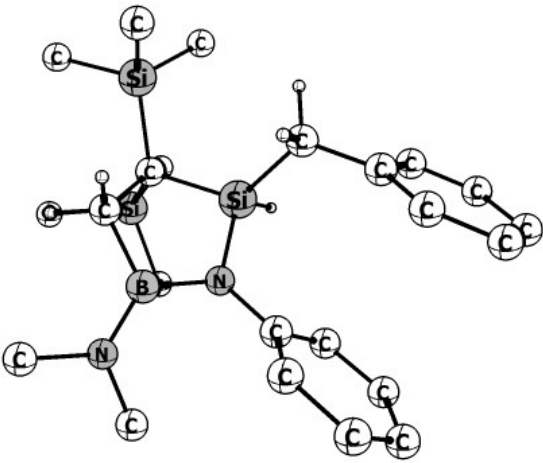

3SiPC-H

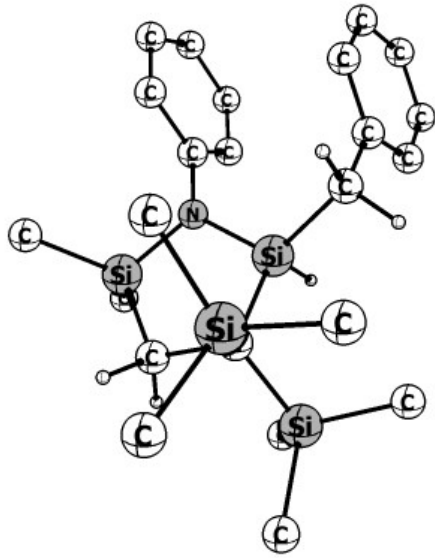

4SiPC-H

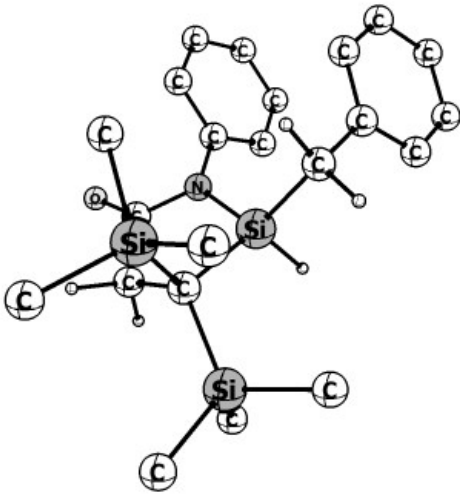

5SiP<sup>C</sup>-H

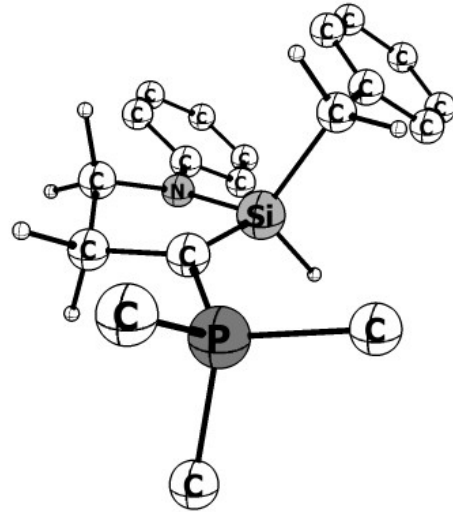

8SiP<sup>C</sup>-H

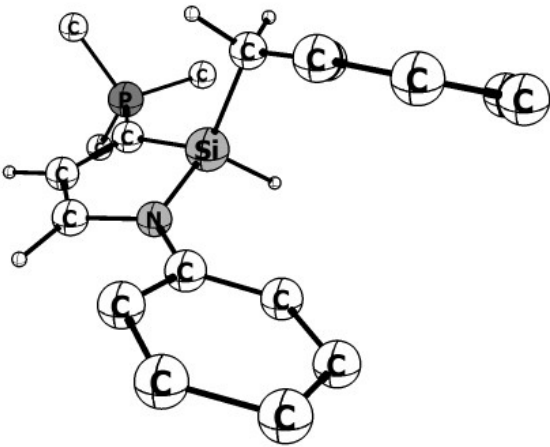

9SiP<sup>C</sup>-H

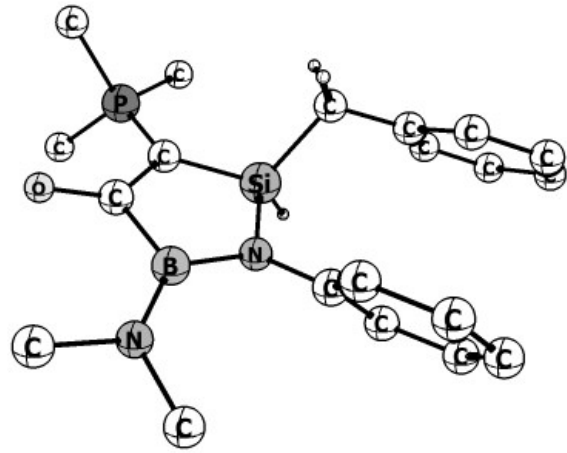

14SiP<sup>C</sup>-H

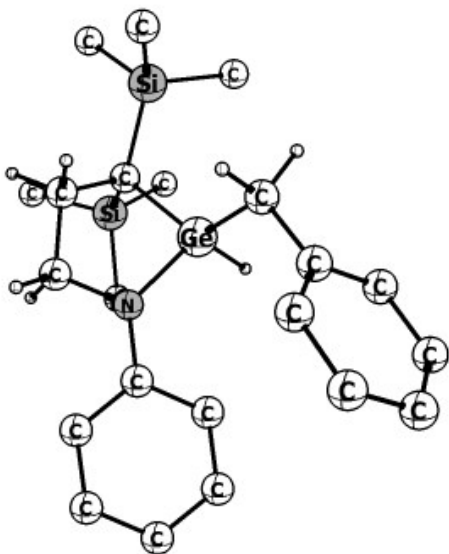

1GePC-H

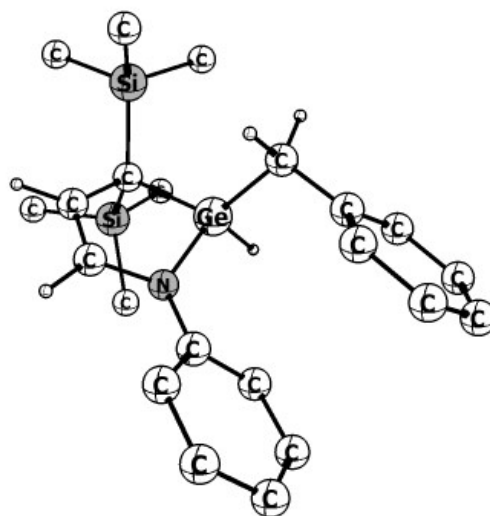

2GePC-H

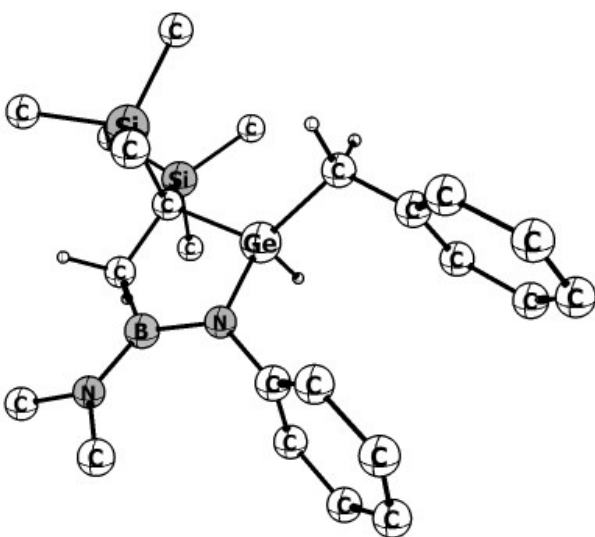

3GePC-H

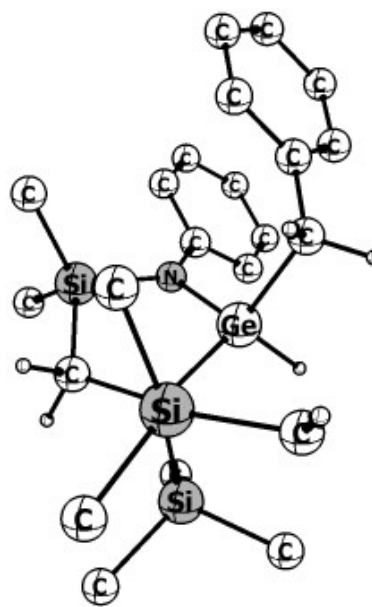

4GePC-H

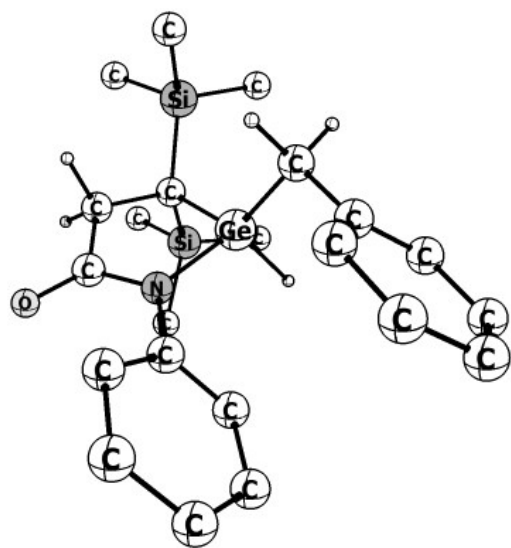

**5GePC-H**

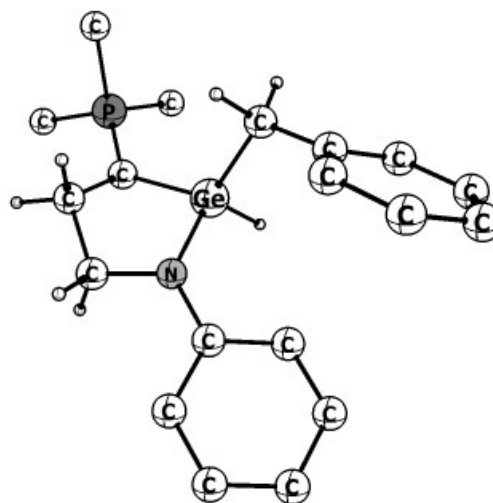

**8GePC-H**

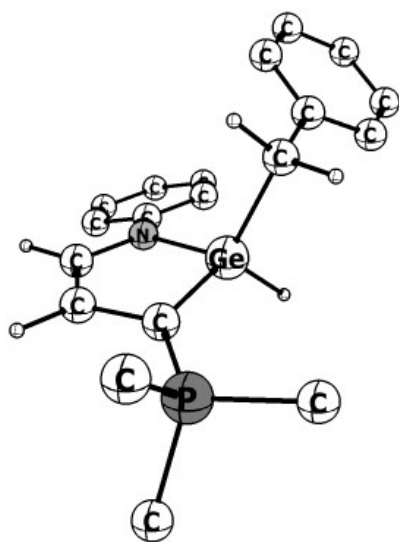

**9GePC-H**

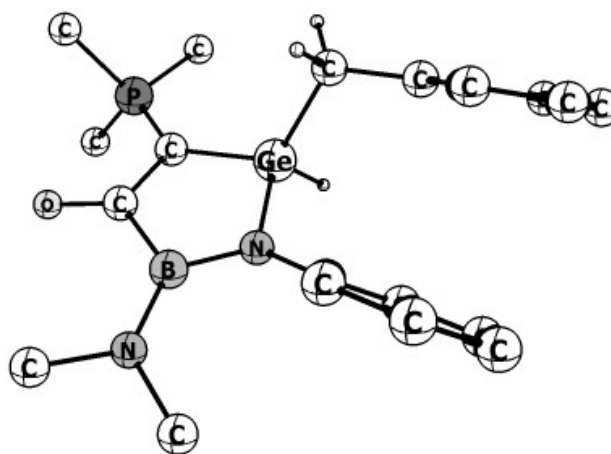

**14GePC-H**

**Fig. S11** Optimized geometries of the C-H splitting product obtained for CAASis (1Si-5Si, 8Si-9Si and 14Si) and CAAGes (1Ge-5Ge, 8Ge-9Ge and 14Ge). The hydrogen atoms of the phenyl and methyl groups are omitted for clarity.

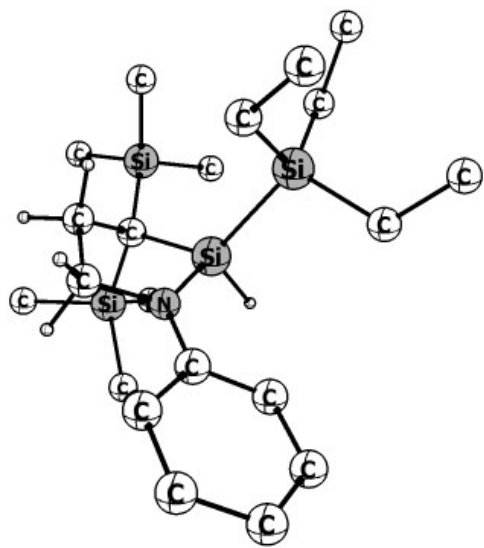

1SiP<sup>Si-H</sup>

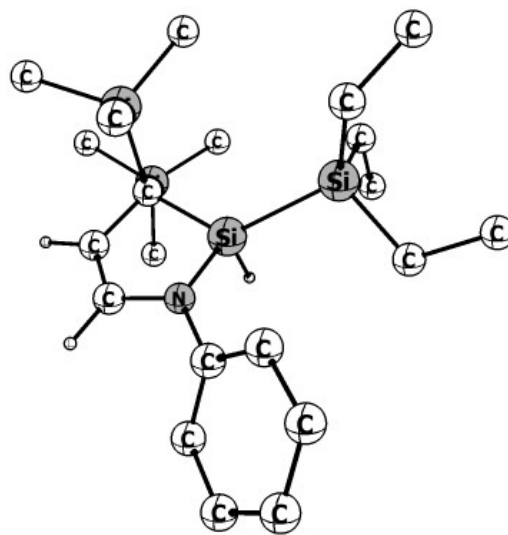

2SiP<sup>Si-H</sup>

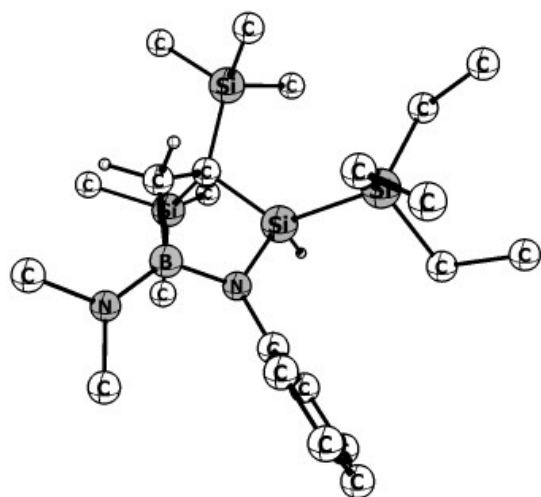

3SiP<sup>Si-H</sup>

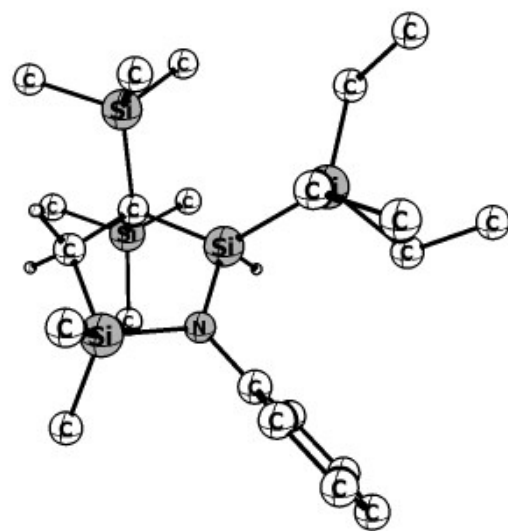

4SiP<sup>Si-H</sup>



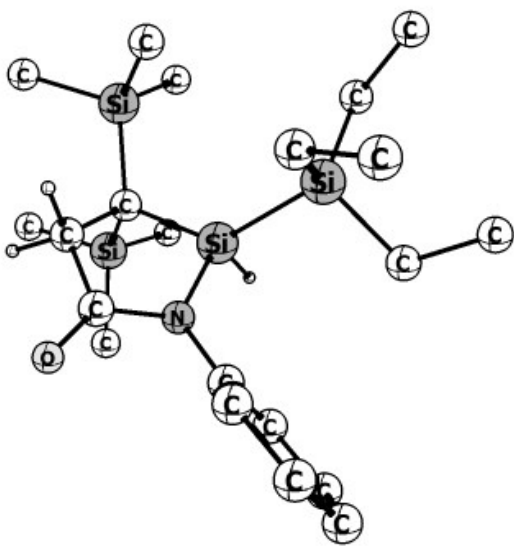

5SiP<sup>Si</sup>-H

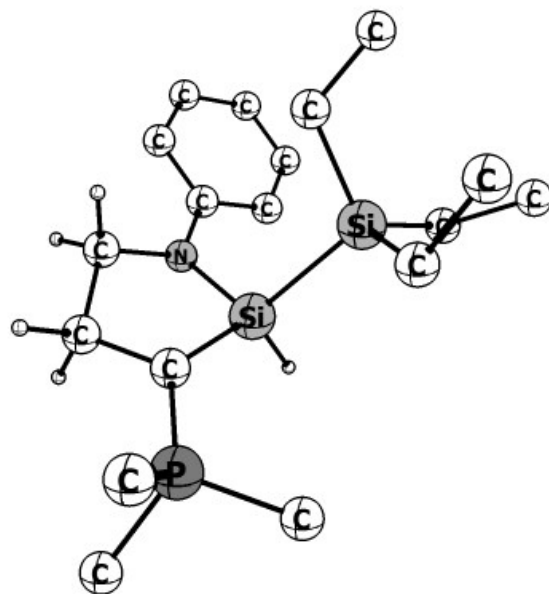

8SiP<sup>Si</sup>-H

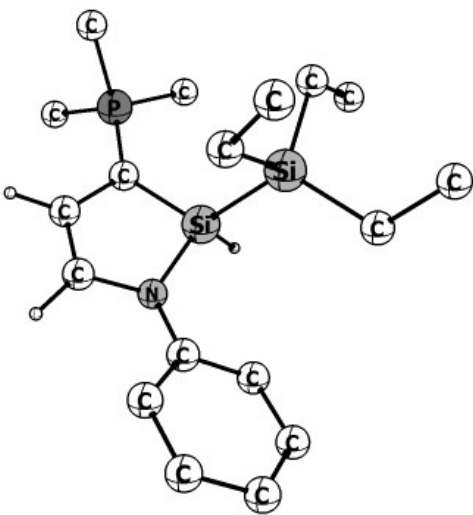

9SiP<sup>Si</sup>-H

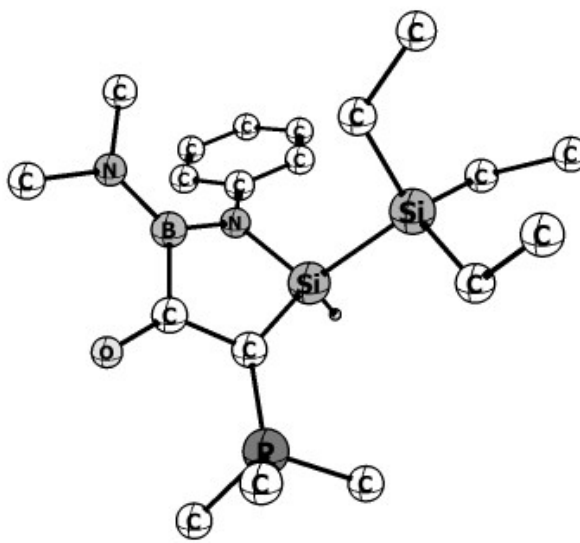

14SiP<sup>Si</sup>-H

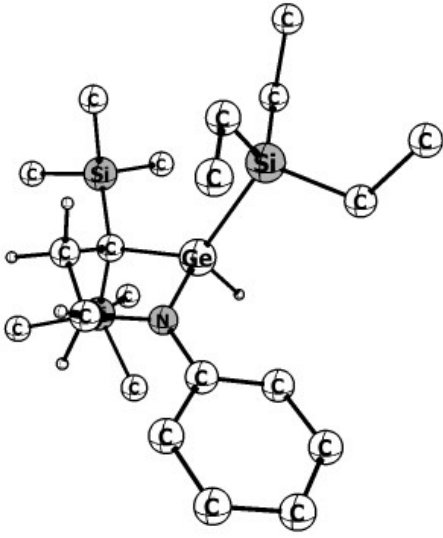

1GePSi-H

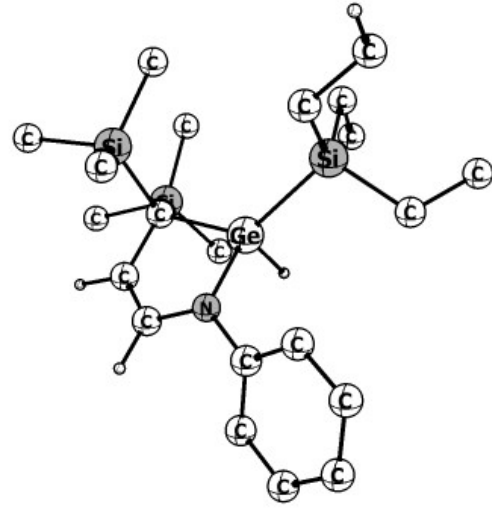

2GePSi-H

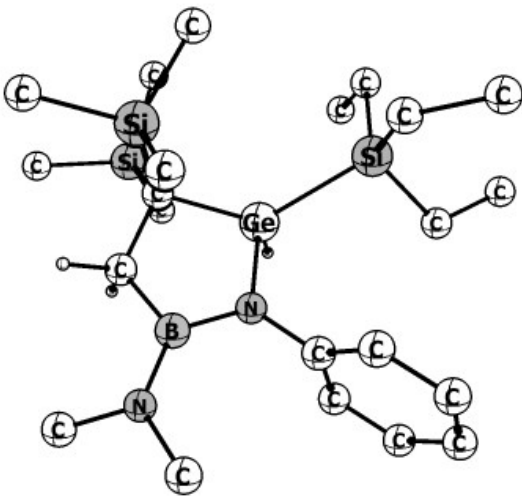

3GePSi-H

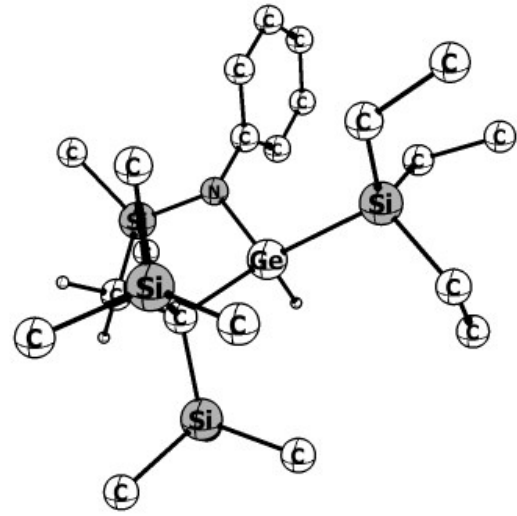

4GePSi-H

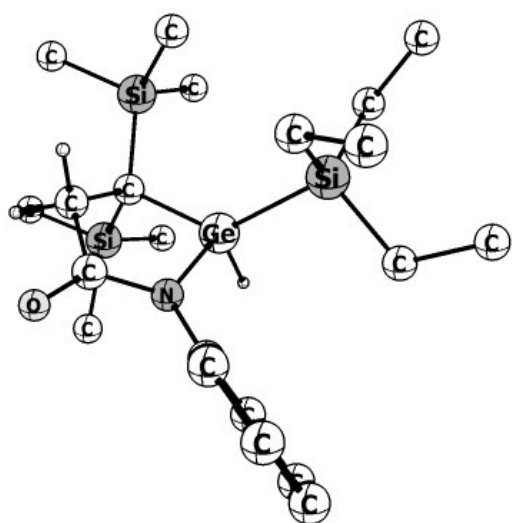

5GePSi-H

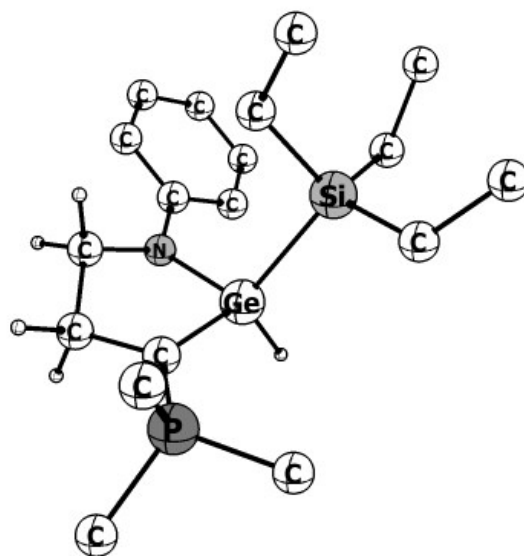

8GePSi-H

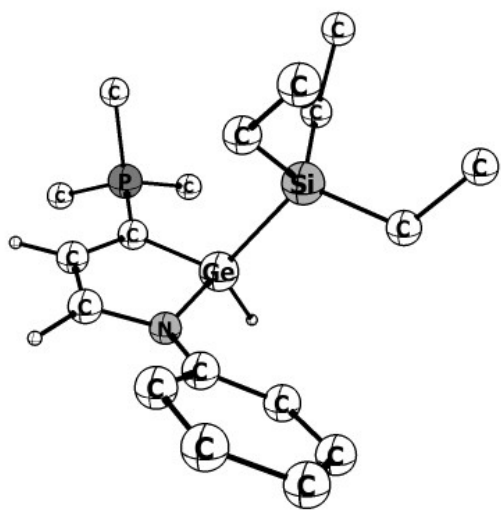

9GePSi-H

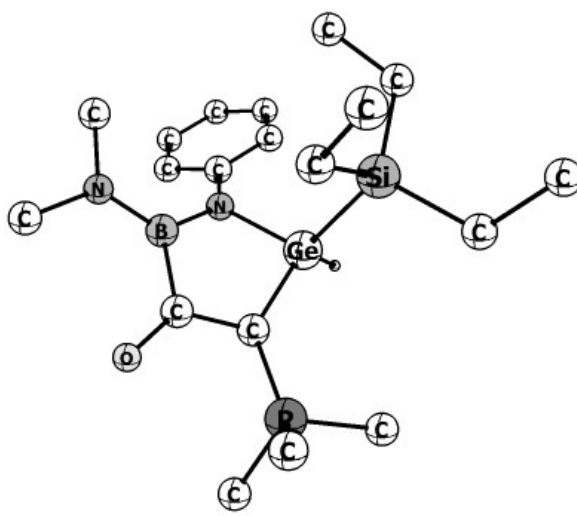

14GePSi-H

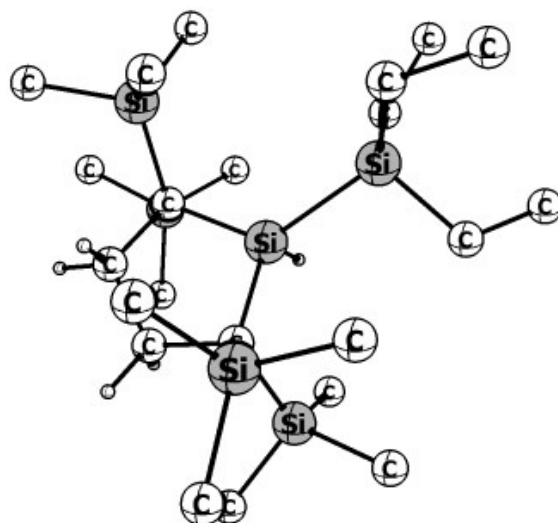

**IX-PSi-H**

**Fig. S12** Optimized geometries of the Si-H splitting product obtained for CAASis (**1Si-5Si**, **8Si-9Si** and **14Si**), CAAGes (**1Ge-5Ge**, **8Ge-9Ge** and **14Ge**) and **IX**. The hydrogen atoms of the phenyl and methyl groups are omitted clarity.

Cartesian coordinates of CAASis (**1Si-14Si**) and CAAGes (**1Ge-14Ge**) in their optimized singlet (S) and triplet (T) state, along with their total energies (in hartrees) including zero point vibrational correction.

**1Si-S** (T.E.= -1510.522303)

|    |              |              |              |
|----|--------------|--------------|--------------|
| 6  | 0.968003000  | 0.558559000  | -1.500008000 |
| 6  | -0.480596000 | 0.123522000  | -1.613044000 |
| 6  | -1.112922000 | -0.002647000 | -0.202145000 |
| 1  | 1.553467000  | 0.217208000  | -2.360776000 |
| 1  | 1.053434000  | 1.652647000  | -1.471941000 |
| 1  | -0.504880000 | -0.846050000 | -2.125038000 |
| 1  | -1.035194000 | 0.812484000  | -2.261998000 |
| 7  | 1.497928000  | -0.024501000 | -0.269155000 |
| 14 | 0.331276000  | -0.352699000 | 0.982472000  |
| 14 | -1.962663000 | 1.596272000  | 0.324789000  |
| 14 | -2.222956000 | -1.527912000 | -0.157073000 |
| 6  | -3.178063000 | -1.700324000 | 1.444189000  |
| 1  | -3.962558000 | -0.947641000 | 1.549746000  |
| 1  | -3.659826000 | -2.681871000 | 1.461354000  |
| 1  | -2.523778000 | -1.636259000 | 2.317557000  |
| 6  | -1.147269000 | -3.060818000 | -0.326468000 |
| 1  | -0.543067000 | -3.225741000 | 0.570843000  |
| 1  | -1.779274000 | -3.942941000 | -0.460762000 |
| 1  | -0.468305000 | -3.007975000 | -1.181075000 |
| 6  | -3.438896000 | -1.534088000 | -1.585315000 |
| 1  | -3.932126000 | -2.509392000 | -1.627411000 |
| 1  | -4.213951000 | -0.773609000 | -1.473505000 |
| 1  | -2.946949000 | -1.373250000 | -2.547415000 |
| 6  | -2.304990000 | 1.661670000  | 2.165634000  |
| 1  | -2.789858000 | 2.614841000  | 2.395634000  |
| 1  | -2.962115000 | 0.862385000  | 2.510535000  |
| 1  | -1.383342000 | 1.611979000  | 2.751524000  |
| 6  | -0.861418000 | 3.066178000  | -0.065140000 |
| 1  | 0.112080000  | 2.993186000  | 0.428551000  |
| 1  | -0.692810000 | 3.186843000  | -1.137637000 |
| 1  | -1.346641000 | 3.977615000  | 0.295431000  |
| 6  | -3.569684000 | 1.860979000  | -0.603768000 |
| 1  | -4.346838000 | 1.156052000  | -0.300494000 |
| 1  | -3.940422000 | 2.870387000  | -0.405099000 |

|   |              |              |              |
|---|--------------|--------------|--------------|
| 1 | -3.429952000 | 1.763824000  | -1.683660000 |
| 6 | 2.889946000  | -0.060135000 | -0.098334000 |
| 6 | 3.736765000  | 0.804470000  | -0.791377000 |
| 6 | 3.461780000  | -0.981060000 | 0.782054000  |
| 6 | 5.106519000  | 0.757712000  | -0.592812000 |
| 1 | 3.324175000  | 1.530084000  | -1.481115000 |
| 6 | 4.827151000  | -1.013724000 | 0.982064000  |
| 1 | 2.818684000  | -1.685445000 | 1.299057000  |
| 6 | 5.662227000  | -0.144934000 | 0.295566000  |
| 1 | 5.744051000  | 1.441043000  | -1.142542000 |
| 1 | 5.245419000  | -1.739413000 | 1.670387000  |
| 1 | 6.734570000  | -0.180908000 | 0.444728000  |

**1Si-T (T.E.= -1510.441248)**

|    |              |              |              |
|----|--------------|--------------|--------------|
| 6  | 0.900768000  | -0.478896000 | -1.660937000 |
| 6  | -0.630468000 | -0.574693000 | -1.569042000 |
| 6  | -1.205002000 | -0.134422000 | -0.194950000 |
| 1  | 1.275137000  | -1.221180000 | -2.376709000 |
| 1  | 1.197573000  | 0.507868000  | -2.037548000 |
| 1  | -0.920788000 | -1.611884000 | -1.772712000 |
| 1  | -1.070763000 | 0.033464000  | -2.369066000 |
| 7  | 1.476373000  | -0.668375000 | -0.344718000 |
| 14 | 0.216139000  | -0.829289000 | 0.867275000  |
| 14 | -1.235052000 | 1.740704000  | 0.088967000  |
| 14 | -2.814838000 | -1.079147000 | 0.102730000  |
| 6  | -3.641393000 | -0.573079000 | 1.701611000  |
| 1  | -4.034515000 | 0.445001000  | 1.672399000  |
| 1  | -4.478779000 | -1.247315000 | 1.899674000  |
| 1  | -2.948259000 | -0.647342000 | 2.544475000  |
| 6  | -2.492177000 | -2.922463000 | 0.202423000  |
| 1  | -2.025212000 | -3.186290000 | 1.154220000  |
| 1  | -3.443036000 | -3.458899000 | 0.129402000  |
| 1  | -1.839459000 | -3.285755000 | -0.594731000 |
| 6  | -3.980409000 | -0.780768000 | -1.334786000 |
| 1  | -4.888861000 | -1.371829000 | -1.191696000 |
| 1  | -4.273370000 | 0.266084000  | -1.428244000 |
| 1  | -3.531699000 | -1.091701000 | -2.281316000 |
| 6  | -1.471425000 | 2.163101000  | 1.896369000  |
| 1  | -1.435798000 | 3.250520000  | 2.008892000  |
| 1  | -2.418643000 | 1.815421000  | 2.311062000  |

|   |              |              |              |
|---|--------------|--------------|--------------|
| 1 | -0.658575000 | 1.740773000  | 2.494650000  |
| 6 | 0.367208000  | 2.548328000  | -0.453849000 |
| 1 | 1.240606000  | 2.105887000  | 0.033946000  |
| 1 | 0.513760000  | 2.503484000  | -1.535521000 |
| 1 | 0.328998000  | 3.604915000  | -0.174063000 |
| 6 | -2.621048000 | 2.519800000  | -0.910836000 |
| 1 | -3.606967000 | 2.250294000  | -0.525276000 |
| 1 | -2.532908000 | 3.608772000  | -0.867930000 |
| 1 | -2.577083000 | 2.223949000  | -1.962409000 |
| 6 | 2.821089000  | -0.488491000 | -0.125458000 |
| 6 | 3.719659000  | -0.200438000 | -1.159524000 |
| 6 | 3.325394000  | -0.572431000 | 1.181150000  |
| 6 | 5.057501000  | 0.018345000  | -0.883421000 |
| 1 | 3.368969000  | -0.139438000 | -2.182078000 |
| 6 | 4.659920000  | -0.344066000 | 1.442417000  |
| 1 | 2.649584000  | -0.833787000 | 1.993162000  |
| 6 | 5.541243000  | -0.045350000 | 0.412903000  |
| 1 | 5.732244000  | 0.245410000  | -1.701489000 |
| 1 | 5.019605000  | -0.410530000 | 2.463116000  |
| 1 | 6.590978000  | 0.124108000  | 0.618783000  |

**2Si-S (T.E.= -1509.336249)**

|    |              |              |              |
|----|--------------|--------------|--------------|
| 6  | -1.103647000 | -0.014175000 | -0.171096000 |
| 6  | -0.461759000 | 0.134093000  | -1.503327000 |
| 6  | 0.874507000  | 0.069311000  | -1.504397000 |
| 1  | -1.027691000 | 0.268207000  | -2.420387000 |
| 1  | 1.510826000  | 0.135670000  | -2.379991000 |
| 14 | 0.311636000  | -0.278628000 | 1.071234000  |
| 7  | 1.463993000  | -0.151833000 | -0.261237000 |
| 14 | -2.241959000 | -1.519443000 | -0.140095000 |
| 14 | -1.897967000 | 1.653483000  | 0.255593000  |
| 6  | -3.793039000 | -1.249511000 | -1.156879000 |
| 1  | -4.330366000 | -2.197517000 | -1.250027000 |
| 1  | -4.472126000 | -0.529509000 | -0.693678000 |
| 1  | -3.562500000 | -0.898372000 | -2.165917000 |
| 6  | -2.741834000 | -1.990059000 | 1.602111000  |
| 1  | -3.392564000 | -2.868042000 | 1.556527000  |
| 1  | -1.874694000 | -2.251120000 | 2.213905000  |
| 1  | -3.288538000 | -1.198298000 | 2.116161000  |
| 6  | -1.306715000 | -2.963171000 | -0.882029000 |

|   |              |              |              |
|---|--------------|--------------|--------------|
| 1 | -1.906661000 | -3.874428000 | -0.812254000 |
| 1 | -1.072876000 | -2.794081000 | -1.935060000 |
| 1 | -0.364936000 | -3.142843000 | -0.355064000 |
| 6 | -2.952062000 | 1.563533000  | 1.799103000  |
| 1 | -3.265523000 | 2.574094000  | 2.075049000  |
| 1 | -3.854939000 | 0.966795000  | 1.652079000  |
| 1 | -2.400021000 | 1.143450000  | 2.643939000  |
| 6 | -0.547105000 | 2.924701000  | 0.538829000  |
| 1 | -0.032829000 | 2.772292000  | 1.491307000  |
| 1 | 0.199034000  | 2.898285000  | -0.260396000 |
| 1 | -0.980527000 | 3.928605000  | 0.554072000  |
| 6 | -2.940550000 | 2.269688000  | -1.172028000 |
| 1 | -3.717339000 | 1.562319000  | -1.466785000 |
| 1 | -3.428129000 | 3.203760000  | -0.879343000 |
| 1 | -2.320682000 | 2.480643000  | -2.046211000 |
| 6 | 2.867566000  | -0.124580000 | -0.122089000 |
| 6 | 3.496748000  | -1.027167000 | 0.729105000  |
| 6 | 3.636951000  | 0.814624000  | -0.802507000 |
| 6 | 4.868033000  | -0.983706000 | 0.902379000  |
| 1 | 2.898293000  | -1.771833000 | 1.242921000  |
| 6 | 5.009795000  | 0.842583000  | -0.636193000 |
| 1 | 3.149221000  | 1.539798000  | -1.444664000 |
| 6 | 5.632378000  | -0.053097000 | 0.217715000  |
| 1 | 5.344016000  | -1.693626000 | 1.568832000  |
| 1 | 5.596532000  | 1.580897000  | -1.170662000 |
| 1 | 6.707529000  | -0.026479000 | 0.347889000  |

**2Si-T (T.E.= -1509.261800)**

|    |              |              |              |
|----|--------------|--------------|--------------|
| 6  | -1.192324000 | -0.145496000 | -0.217618000 |
| 6  | -0.556751000 | -0.408957000 | -1.503332000 |
| 6  | 0.808140000  | -0.532049000 | -1.541223000 |
| 1  | -1.128186000 | -0.588727000 | -2.412934000 |
| 1  | 1.371178000  | -0.676689000 | -2.459039000 |
| 14 | 0.159858000  | -0.962548000 | 0.992067000  |
| 7  | 1.427192000  | -0.556380000 | -0.345611000 |
| 14 | -2.851445000 | -1.043661000 | -0.053680000 |
| 14 | -1.160410000 | 1.709752000  | 0.206722000  |
| 6  | -4.225054000 | -0.120696000 | -0.932101000 |
| 1  | -5.121622000 | -0.744861000 | -0.971856000 |
| 1  | -4.488686000 | 0.810450000  | -0.425976000 |



|   |              |              |              |
|---|--------------|--------------|--------------|
| 1 | -3.941275000 | 0.122701000  | -1.959994000 |
| 6 | -3.304949000 | -1.289450000 | 1.743427000  |
| 1 | -4.246644000 | -1.841648000 | 1.805192000  |
| 1 | -2.541659000 | -1.874268000 | 2.263538000  |
| 1 | -3.432652000 | -0.346938000 | 2.277823000  |
| 6 | -2.664825000 | -2.723239000 | -0.858915000 |
| 1 | -3.534606000 | -3.348615000 | -0.642350000 |
| 1 | -2.572220000 | -2.646255000 | -1.944888000 |
| 1 | -1.773707000 | -3.231104000 | -0.478290000 |
| 6 | -1.990784000 | 2.009379000  | 1.855427000  |
| 1 | -1.825327000 | 3.049914000  | 2.147781000  |
| 1 | -3.070109000 | 1.845835000  | 1.819067000  |
| 1 | -1.569849000 | 1.371986000  | 2.637473000  |
| 6 | 0.573177000  | 2.412333000  | 0.279235000  |
| 1 | 1.182930000  | 1.950393000  | 1.059553000  |
| 1 | 1.099156000  | 2.323015000  | -0.674118000 |
| 1 | 0.488561000  | 3.479565000  | 0.506057000  |
| 6 | -2.053260000 | 2.670345000  | -1.136173000 |
| 1 | -3.116281000 | 2.432375000  | -1.194054000 |
| 1 | -1.957525000 | 3.743270000  | -0.948003000 |
| 1 | -1.606665000 | 2.464465000  | -2.113026000 |
| 6 | 2.796096000  | -0.439754000 | -0.181968000 |
| 6 | 3.375087000  | -0.861870000 | 1.018722000  |
| 6 | 3.611921000  | 0.140969000  | -1.158666000 |
| 6 | 4.730859000  | -0.707133000 | 1.231429000  |
| 1 | 2.750259000  | -1.335441000 | 1.769040000  |
| 6 | 4.966089000  | 0.282580000  | -0.936938000 |
| 1 | 3.172355000  | 0.521056000  | -2.073676000 |
| 6 | 5.535413000  | -0.139364000 | 0.256642000  |
| 1 | 5.164527000  | -1.043435000 | 2.165896000  |
| 1 | 5.583633000  | 0.744778000  | -1.698271000 |
| 1 | 6.599015000  | -0.022361000 | 0.425114000  |

**3Si-S (T.E.= -1630.623646)**

|    |              |              |              |
|----|--------------|--------------|--------------|
| 6  | -0.710193000 | 0.782798000  | -1.148750000 |
| 6  | -1.384737000 | -0.139117000 | -0.088643000 |
| 1  | -0.801809000 | 0.338409000  | -2.152178000 |
| 1  | -1.215005000 | 1.753319000  | -1.234113000 |
| 14 | -0.025847000 | -1.231286000 | 0.654247000  |
| 7  | 1.268812000  | -0.263090000 | -0.018409000 |

|    |              |              |              |
|----|--------------|--------------|--------------|
| 5  | 0.827063000  | 0.891375000  | -0.798300000 |
| 7  | 1.632500000  | 1.992521000  | -1.151539000 |
| 6  | 1.158886000  | 3.023582000  | -2.046085000 |
| 1  | 0.959616000  | 3.960412000  | -1.508111000 |
| 1  | 1.913330000  | 3.240966000  | -2.810843000 |
| 1  | 0.247229000  | 2.718764000  | -2.556346000 |
| 6  | 2.922279000  | 2.332520000  | -0.593751000 |
| 1  | 2.903417000  | 3.367405000  | -0.232213000 |
| 1  | 3.182094000  | 1.692851000  | 0.246867000  |
| 1  | 3.722836000  | 2.257590000  | -1.340364000 |
| 14 | -2.676337000 | -1.238736000 | -0.900391000 |
| 14 | -2.027676000 | 0.941355000  | 1.317118000  |
| 6  | -1.776837000 | -2.454571000 | -2.017406000 |
| 1  | -1.226894000 | -3.192707000 | -1.425773000 |
| 1  | -2.482549000 | -2.999766000 | -2.649610000 |
| 1  | -1.059849000 | -1.956556000 | -2.675756000 |
| 6  | -3.854857000 | -0.237533000 | -1.961447000 |
| 1  | -4.478979000 | -0.915597000 | -2.550236000 |
| 1  | -4.516459000 | 0.388187000  | -1.358817000 |
| 1  | -3.323392000 | 0.412497000  | -2.660414000 |
| 6  | -3.567878000 | 1.886214000  | 0.817197000  |
| 1  | -4.442540000 | 1.235204000  | 0.751932000  |
| 1  | -3.781053000 | 2.654029000  | 1.566127000  |
| 1  | -3.445366000 | 2.382802000  | -0.148193000 |
| 6  | -2.404388000 | -0.026913000 | 2.878461000  |
| 1  | -2.789158000 | 0.662070000  | 3.636009000  |
| 1  | -3.151129000 | -0.808355000 | 2.730197000  |
| 1  | -1.506687000 | -0.497898000 | 3.288156000  |
| 6  | -3.672085000 | -2.236698000 | 0.332268000  |
| 1  | -4.332525000 | -1.609930000 | 0.935477000  |
| 1  | -4.297557000 | -2.955682000 | -0.203631000 |
| 1  | -3.023667000 | -2.799409000 | 1.009141000  |
| 6  | -0.719690000 | 2.209629000  | 1.784273000  |
| 1  | 0.206873000  | 1.739036000  | 2.128573000  |
| 1  | -0.466692000 | 2.881048000  | 0.959695000  |
| 1  | -1.102980000 | 2.822590000  | 2.604935000  |
| 6  | 2.613813000  | -0.649557000 | 0.174992000  |
| 6  | 3.438201000  | -0.895318000 | -0.919118000 |
| 6  | 3.134145000  | -0.799372000 | 1.456195000  |
| 6  | 4.759575000  | -1.257007000 | -0.733841000 |

|   |             |              |              |
|---|-------------|--------------|--------------|
| 1 | 3.027150000 | -0.786705000 | -1.917631000 |
| 6 | 4.455994000 | -1.170307000 | 1.638292000  |
| 1 | 2.494750000 | -0.595685000 | 2.309522000  |
| 6 | 5.276040000 | -1.394413000 | 0.545624000  |
| 1 | 5.390694000 | -1.438978000 | -1.596248000 |
| 1 | 4.848475000 | -1.276381000 | 2.643157000  |
| 1 | 6.311750000 | -1.678685000 | 0.688622000  |

**3Si-T (T.E.= -1630.544869)**

|    |              |              |              |
|----|--------------|--------------|--------------|
| 6  | -0.725562000 | 0.735537000  | -1.211773000 |
| 6  | -1.460184000 | -0.131781000 | -0.150773000 |
| 1  | -0.807730000 | 0.275999000  | -2.206450000 |
| 1  | -1.221128000 | 1.711283000  | -1.278979000 |
| 14 | -0.015842000 | -1.303608000 | 0.284720000  |
| 7  | 1.351372000  | -0.299644000 | -0.213468000 |
| 5  | 0.826879000  | 0.883651000  | -0.848413000 |
| 7  | 1.530577000  | 2.093147000  | -1.040639000 |
| 6  | 0.970718000  | 3.202137000  | -1.776710000 |
| 1  | 0.583813000  | 3.980281000  | -1.102151000 |
| 1  | 1.736931000  | 3.667499000  | -2.406388000 |
| 1  | 0.162040000  | 2.879542000  | -2.430303000 |
| 6  | 2.746603000  | 2.465374000  | -0.355293000 |
| 1  | 2.602671000  | 3.429006000  | 0.149105000  |
| 1  | 3.017244000  | 1.732923000  | 0.402713000  |
| 1  | 3.593245000  | 2.577465000  | -1.044017000 |
| 14 | -2.852775000 | -1.178767000 | -0.868893000 |
| 14 | -1.822824000 | 0.890873000  | 1.400504000  |
| 6  | -2.357655000 | -1.835115000 | -2.551961000 |
| 1  | -1.381931000 | -2.327322000 | -2.513485000 |
| 1  | -3.096249000 | -2.571665000 | -2.879756000 |
| 1  | -2.316786000 | -1.049398000 | -3.309592000 |
| 6  | -4.399613000 | -0.143605000 | -1.097788000 |
| 1  | -5.143302000 | -0.705763000 | -1.668487000 |
| 1  | -4.854636000 | 0.144252000  | -0.147502000 |
| 1  | -4.171489000 | 0.770199000  | -1.654060000 |
| 6  | -2.920907000 | 2.356353000  | 0.977669000  |
| 1  | -3.896008000 | 2.065893000  | 0.584349000  |
| 1  | -3.086599000 | 2.945085000  | 1.884485000  |
| 1  | -2.440906000 | 3.013608000  | 0.247500000  |
| 6  | -2.663139000 | -0.141307000 | 2.715156000  |

|   |              |              |              |
|---|--------------|--------------|--------------|
| 1 | -2.727228000 | 0.435519000  | 3.641516000  |
| 1 | -3.679537000 | -0.423188000 | 2.430507000  |
| 1 | -2.099224000 | -1.054229000 | 2.926479000  |
| 6 | -3.230073000 | -2.642783000 | 0.235933000  |
| 1 | -3.589514000 | -2.346560000 | 1.222428000  |
| 1 | -4.000250000 | -3.264336000 | -0.228462000 |
| 1 | -2.342465000 | -3.268707000 | 0.372668000  |
| 6 | -0.263614000 | 1.643746000  | 2.127901000  |
| 1 | 0.480901000  | 0.897125000  | 2.416831000  |
| 1 | 0.207803000  | 2.351345000  | 1.438785000  |
| 1 | -0.545242000 | 2.201690000  | 3.025953000  |
| 6 | 2.677478000  | -0.686802000 | 0.014154000  |
| 6 | 3.640128000  | -0.571810000 | -0.987850000 |
| 6 | 3.052527000  | -1.235124000 | 1.239522000  |
| 6 | 4.944341000  | -0.966462000 | -0.756375000 |
| 1 | 3.347944000  | -0.168673000 | -1.951694000 |
| 6 | 4.357773000  | -1.636500000 | 1.463069000  |
| 1 | 2.302937000  | -1.325242000 | 2.022645000  |
| 6 | 5.313088000  | -1.500217000 | 0.469200000  |
| 1 | 5.679682000  | -0.866346000 | -1.546913000 |
| 1 | 4.630738000  | -2.054240000 | 2.425577000  |
| 1 | 6.334954000  | -1.814637000 | 0.644402000  |

**4Si-S (T.E.= -1840.535173)**

|    |              |              |              |
|----|--------------|--------------|--------------|
| 6  | 0.907781000  | -0.070592000 | 1.538512000  |
| 6  | 1.351725000  | -0.027397000 | 0.040769000  |
| 1  | 1.224897000  | -1.002649000 | 2.022762000  |
| 1  | 1.379371000  | 0.721686000  | 2.132923000  |
| 14 | -0.102906000 | -0.124675000 | -1.194192000 |
| 7  | -1.374691000 | -0.042568000 | -0.027370000 |
| 14 | 2.418245000  | -1.548427000 | -0.299291000 |
| 14 | 2.212194000  | 1.612305000  | -0.315539000 |
| 6  | 1.304674000  | -3.056883000 | -0.153945000 |
| 1  | 0.546205000  | -3.074163000 | -0.943181000 |
| 1  | 1.887818000  | -3.977643000 | -0.237768000 |
| 1  | 0.784518000  | -3.082185000 | 0.807688000  |
| 6  | 3.798409000  | -1.736988000 | 0.956309000  |
| 1  | 4.247647000  | -2.727775000 | 0.842750000  |
| 1  | 4.585057000  | -0.995404000 | 0.806832000  |
| 1  | 3.446137000  | -1.649719000 | 1.986189000  |

|    |              |              |              |
|----|--------------|--------------|--------------|
| 6  | 3.879526000  | 1.730057000  | 0.535530000  |
| 1  | 4.624820000  | 1.109405000  | 0.032011000  |
| 1  | 4.231500000  | 2.764737000  | 0.499691000  |
| 1  | 3.839562000  | 1.424086000  | 1.583776000  |
| 6  | 2.470794000  | 1.940820000  | -2.143158000 |
| 1  | 3.035032000  | 2.871994000  | -2.250636000 |
| 1  | 3.030338000  | 1.151533000  | -2.647144000 |
| 1  | 1.522821000  | 2.065787000  | -2.672171000 |
| 6  | 3.194618000  | -1.548225000 | -2.004420000 |
| 1  | 3.983135000  | -0.795706000 | -2.086418000 |
| 1  | 3.650432000  | -2.524406000 | -2.191463000 |
| 1  | 2.463725000  | -1.362201000 | -2.795020000 |
| 6  | 1.132724000  | 3.010866000  | 0.323231000  |
| 1  | 0.163165000  | 3.026097000  | -0.185286000 |
| 1  | 0.948460000  | 2.949833000  | 1.398306000  |
| 1  | 1.622500000  | 3.968282000  | 0.125353000  |
| 14 | -0.964066000 | 0.011607000  | 1.677718000  |
| 6  | -1.621433000 | 1.556759000  | 2.490971000  |
| 1  | -1.306735000 | 2.459271000  | 1.963303000  |
| 1  | -2.713699000 | 1.543260000  | 2.524871000  |
| 1  | -1.260803000 | 1.622827000  | 3.520897000  |
| 6  | -1.683295000 | -1.470240000 | 2.555634000  |
| 1  | -1.315987000 | -2.403749000 | 2.121435000  |
| 1  | -1.417046000 | -1.461254000 | 3.615473000  |
| 1  | -2.774239000 | -1.471033000 | 2.487176000  |
| 6  | -2.733685000 | -0.048136000 | -0.432721000 |
| 6  | -3.409618000 | 1.149000000  | -0.644692000 |
| 6  | -3.404773000 | -1.249079000 | -0.636747000 |
| 6  | -4.733317000 | 1.143566000  | -1.048363000 |
| 1  | -2.876450000 | 2.083319000  | -0.497646000 |
| 6  | -4.728271000 | -1.251088000 | -1.041927000 |
| 1  | -2.867215000 | -2.179171000 | -0.477206000 |
| 6  | -5.397995000 | -0.055721000 | -1.247139000 |
| 1  | -5.246414000 | 2.083872000  | -1.215309000 |
| 1  | -5.238072000 | -2.194109000 | -1.203172000 |
| 1  | -6.433369000 | -0.058502000 | -1.566240000 |

**4Si-T (T.E.= -1840.459688)**

|   |              |             |             |
|---|--------------|-------------|-------------|
| 6 | -0.920729000 | 1.053855000 | 1.120107000 |
| 6 | -1.428534000 | 0.022866000 | 0.075043000 |

|    |              |              |              |
|----|--------------|--------------|--------------|
| 1  | -1.527089000 | 1.967221000  | 1.113392000  |
| 1  | -1.009590000 | 0.645351000  | 2.135460000  |
| 14 | 0.025971000  | -0.118312000 | -1.168687000 |
| 7  | 1.444933000  | 0.394230000  | -0.272019000 |
| 14 | -2.884375000 | 0.701584000  | -0.915101000 |
| 14 | -1.607696000 | -1.687398000 | 0.858800000  |
| 6  | -2.571304000 | 2.496295000  | -1.359287000 |
| 1  | -1.620868000 | 2.611948000  | -1.887726000 |
| 1  | -3.370128000 | 2.843501000  | -2.020528000 |
| 1  | -2.560342000 | 3.153526000  | -0.486558000 |
| 6  | -4.459416000 | 0.632244000  | 0.099190000  |
| 1  | -5.244301000 | 1.210939000  | -0.394710000 |
| 1  | -4.823622000 | -0.390375000 | 0.220591000  |
| 1  | -4.306580000 | 1.056817000  | 1.095515000  |
| 6  | -2.881848000 | -1.659506000 | 2.239508000  |
| 1  | -3.899024000 | -1.563954000 | 1.856776000  |
| 1  | -2.820761000 | -2.595033000 | 2.802406000  |
| 1  | -2.708620000 | -0.840298000 | 2.941424000  |
| 6  | -2.120040000 | -2.980416000 | -0.393430000 |
| 1  | -2.048112000 | -3.971250000 | 0.063038000  |
| 1  | -3.152470000 | -2.845353000 | -0.724126000 |
| 1  | -1.470771000 | -2.969033000 | -1.273677000 |
| 6  | -3.130700000 | -0.249238000 | -2.509539000 |
| 1  | -3.388179000 | -1.296139000 | -2.341196000 |
| 1  | -3.945970000 | 0.206634000  | -3.078015000 |
| 1  | -2.235841000 | -0.215875000 | -3.138596000 |
| 6  | 0.014275000  | -2.211228000 | 1.641362000  |
| 1  | 0.836925000  | -2.258481000 | 0.923096000  |
| 1  | 0.308857000  | -1.544061000 | 2.455504000  |
| 1  | -0.112618000 | -3.208839000 | 2.071554000  |
| 14 | 0.902215000  | 1.565372000  | 0.916784000  |
| 6  | 1.788228000  | 1.357782000  | 2.546744000  |
| 1  | 2.016042000  | 0.304654000  | 2.727844000  |
| 1  | 2.721105000  | 1.919935000  | 2.603946000  |
| 1  | 1.137605000  | 1.706263000  | 3.353178000  |
| 6  | 1.016507000  | 3.310818000  | 0.276947000  |
| 1  | 0.516762000  | 3.378679000  | -0.693249000 |
| 1  | 0.524041000  | 4.007910000  | 0.959669000  |
| 1  | 2.051950000  | 3.633993000  | 0.149713000  |
| 6  | 2.735586000  | -0.088710000 | -0.468406000 |

|   |             |              |              |
|---|-------------|--------------|--------------|
| 6 | 3.852884000 | 0.614019000  | -0.006528000 |
| 6 | 2.960821000 | -1.292005000 | -1.146149000 |
| 6 | 5.130530000 | 0.118989000  | -0.188661000 |
| 1 | 3.715910000 | 1.567632000  | 0.492212000  |
| 6 | 4.240461000 | -1.777657000 | -1.329473000 |
| 1 | 2.106173000 | -1.850367000 | -1.523575000 |
| 6 | 5.338536000 | -1.080299000 | -0.849818000 |
| 1 | 5.975605000 | 0.686998000  | 0.184196000  |
| 1 | 4.380760000 | -2.715457000 | -1.855732000 |
| 1 | 6.341484000 | -1.461396000 | -0.998482000 |

**5Si-S (T.E.= -1584.588707)**

|    |              |              |              |
|----|--------------|--------------|--------------|
| 6  | 0.558245000  | -0.368212000 | 1.494022000  |
| 6  | 1.185909000  | -0.088364000 | 0.119996000  |
| 1  | 0.750284000  | -1.395486000 | 1.831161000  |
| 1  | 0.940390000  | 0.258650000  | 2.307189000  |
| 14 | -0.228085000 | -0.093798000 | -1.134005000 |
| 7  | -1.420989000 | -0.177210000 | 0.161744000  |
| 14 | 2.396791000  | -1.468866000 | -0.326166000 |
| 14 | 1.903221000  | 1.666317000  | 0.084765000  |
| 6  | 1.394834000  | -3.034438000 | -0.597404000 |
| 1  | 0.802152000  | -2.970608000 | -1.515186000 |
| 1  | 2.054675000  | -3.900452000 | -0.694470000 |
| 1  | 0.708755000  | -3.235840000 | 0.230135000  |
| 6  | 3.601161000  | -1.784160000 | 1.072098000  |
| 1  | 4.161543000  | -2.699278000 | 0.861834000  |
| 1  | 4.320482000  | -0.971492000 | 1.184557000  |
| 1  | 3.096221000  | -1.921845000 | 2.031150000  |
| 6  | 3.444807000  | 1.780712000  | 1.138519000  |
| 1  | 4.284821000  | 1.252407000  | 0.681978000  |
| 1  | 3.731975000  | 2.829466000  | 1.251674000  |
| 1  | 3.286758000  | 1.367186000  | 2.137527000  |
| 6  | 2.302726000  | 2.252263000  | -1.648290000 |
| 1  | 2.675755000  | 3.278670000  | -1.587655000 |
| 1  | 3.068303000  | 1.649910000  | -2.138677000 |
| 1  | 1.420398000  | 2.262322000  | -2.293380000 |
| 6  | 3.351205000  | -1.105770000 | -1.892719000 |
| 1  | 4.094210000  | -0.318335000 | -1.746334000 |
| 1  | 3.883323000  | -2.007719000 | -2.206178000 |
| 1  | 2.693078000  | -0.805706000 | -2.712366000 |

|   |              |              |              |
|---|--------------|--------------|--------------|
| 6 | 0.618182000  | 2.845199000  | 0.775421000  |
| 1 | -0.282605000 | 2.868686000  | 0.154410000  |
| 1 | 0.312131000  | 2.602182000  | 1.795206000  |
| 1 | 1.031659000  | 3.857275000  | 0.789276000  |
| 6 | -2.823641000 | -0.114177000 | -0.063817000 |
| 6 | -3.658942000 | -1.129193000 | 0.382397000  |
| 6 | -3.357607000 | 0.959563000  | -0.761121000 |
| 6 | -5.015936000 | -1.067031000 | 0.127742000  |
| 1 | -3.236565000 | -1.965422000 | 0.926793000  |
| 6 | -4.716467000 | 1.013160000  | -1.022174000 |
| 1 | -2.700030000 | 1.758423000  | -1.089160000 |
| 6 | -5.548833000 | 0.001560000  | -0.576882000 |
| 1 | -5.663037000 | -1.862201000 | 0.479204000  |
| 1 | -5.124687000 | 1.854629000  | -1.569464000 |
| 1 | -6.612976000 | 0.045130000  | -0.776246000 |
| 6 | -0.944707000 | -0.235238000 | 1.473686000  |
| 8 | -1.637835000 | -0.199558000 | 2.457706000  |

**5Si-T (T.E.= -1584.506604)**

|    |              |              |              |
|----|--------------|--------------|--------------|
| 6  | 0.598037000  | -0.678554000 | 1.377614000  |
| 6  | 1.272119000  | -0.144078000 | 0.089801000  |
| 1  | 0.779514000  | -1.753703000 | 1.514666000  |
| 1  | 1.011517000  | -0.187539000 | 2.266572000  |
| 14 | -0.209013000 | -0.391211000 | -1.076644000 |
| 7  | -1.469547000 | -0.436536000 | 0.182675000  |
| 14 | 2.737001000  | -1.244039000 | -0.377294000 |
| 14 | 1.550438000  | 1.737103000  | 0.167287000  |
| 6  | 2.128183000  | -2.970697000 | -0.768955000 |
| 1  | 1.628105000  | -2.993890000 | -1.740219000 |
| 1  | 2.974614000  | -3.662330000 | -0.804055000 |
| 1  | 1.419980000  | -3.346748000 | -0.026315000 |
| 6  | 3.914998000  | -1.352204000 | 1.074384000  |
| 1  | 4.701693000  | -2.076048000 | 0.846536000  |
| 1  | 4.392749000  | -0.396770000 | 1.295688000  |
| 1  | 3.406279000  | -1.693772000 | 1.979089000  |
| 6  | 3.028284000  | 2.111110000  | 1.260231000  |
| 1  | 3.966355000  | 1.787149000  | 0.803921000  |
| 1  | 3.091659000  | 3.190454000  | 1.422456000  |
| 1  | 2.944472000  | 1.632918000  | 2.239512000  |
| 6  | 1.838617000  | 2.466944000  | -1.528531000 |



|   |              |              |              |
|---|--------------|--------------|--------------|
| 1 | 1.967902000  | 3.548365000  | -1.430597000 |
| 1 | 2.725209000  | 2.069426000  | -2.024723000 |
| 1 | 0.974655000  | 2.292615000  | -2.176298000 |
| 6 | 3.626389000  | -0.579591000 | -1.880405000 |
| 1 | 4.152745000  | 0.355212000  | -1.675249000 |
| 1 | 4.365965000  | -1.309683000 | -2.218652000 |
| 1 | 2.930522000  | -0.405009000 | -2.706266000 |
| 6 | 0.049793000  | 2.562779000  | 0.921515000  |
| 1 | -0.857455000 | 2.384607000  | 0.337315000  |
| 1 | -0.137045000 | 2.235126000  | 1.947076000  |
| 1 | 0.222157000  | 3.642114000  | 0.947009000  |
| 6 | -2.849108000 | -0.283071000 | -0.063990000 |
| 6 | -3.818293000 | -0.886603000 | 0.731785000  |
| 6 | -3.245778000 | 0.461483000  | -1.171313000 |
| 6 | -5.156549000 | -0.731317000 | 0.419766000  |
| 1 | -3.519960000 | -1.470300000 | 1.590605000  |
| 6 | -4.586123000 | 0.606039000  | -1.478712000 |
| 1 | -2.486697000 | 0.945121000  | -1.784003000 |
| 6 | -5.549500000 | 0.011676000  | -0.681845000 |
| 1 | -5.903084000 | -1.205552000 | 1.046465000  |
| 1 | -4.876436000 | 1.191251000  | -2.343520000 |
| 1 | -6.600632000 | 0.123548000  | -0.919583000 |
| 6 | -0.913509000 | -0.512456000 | 1.438688000  |
| 8 | -1.513910000 | -0.469441000 | 2.488347000  |

**6Si-S (T.E.= -1662.881811)**

|    |              |              |              |
|----|--------------|--------------|--------------|
| 6  | 0.893797000  | 1.061413000  | -0.293215000 |
| 6  | -0.509224000 | 1.098148000  | -0.258907000 |
| 6  | -1.162484000 | -0.212067000 | 0.047126000  |
| 7  | 1.417877000  | -0.204736000 | -0.021176000 |
| 14 | 0.254054000  | -1.472954000 | 0.283546000  |
| 14 | -2.021709000 | -0.124994000 | 1.734020000  |
| 14 | -2.195625000 | -0.823625000 | -1.417244000 |
| 6  | -2.527881000 | -2.665678000 | -1.315028000 |
| 1  | -3.038535000 | -2.951998000 | -0.393911000 |
| 1  | -3.171035000 | -2.949067000 | -2.153321000 |
| 1  | -1.611515000 | -3.256599000 | -1.385503000 |
| 6  | -1.205888000 | -0.497266000 | -2.974109000 |
| 1  | -0.231024000 | -0.993917000 | -2.935431000 |
| 1  | -1.738809000 | -0.881986000 | -3.847518000 |

|   |              |              |              |
|---|--------------|--------------|--------------|
| 1 | -1.030522000 | 0.570065000  | -3.127137000 |
| 6 | -3.858768000 | 0.026295000  | -1.568299000 |
| 1 | -4.353210000 | -0.331130000 | -2.476106000 |
| 1 | -4.510806000 | -0.209433000 | -0.723490000 |
| 1 | -3.773956000 | 1.112351000  | -1.641708000 |
| 6 | -2.872907000 | -1.741046000 | 2.143022000  |
| 1 | -3.246077000 | -1.698868000 | 3.169785000  |
| 1 | -3.729123000 | -1.923846000 | 1.488880000  |
| 1 | -2.198077000 | -2.597158000 | 2.066486000  |
| 6 | -0.709841000 | 0.239367000  | 3.025407000  |
| 1 | -0.022878000 | -0.599291000 | 3.171195000  |
| 1 | -0.119762000 | 1.113578000  | 2.734423000  |
| 1 | -1.175772000 | 0.458036000  | 3.989790000  |
| 6 | -3.288569000 | 1.248743000  | 1.843746000  |
| 1 | -4.049367000 | 1.190082000  | 1.063857000  |
| 1 | -3.792878000 | 1.172839000  | 2.811611000  |
| 1 | -2.818516000 | 2.232581000  | 1.791969000  |
| 6 | 1.636443000  | 2.191272000  | -0.611663000 |
| 6 | 0.977107000  | 3.375662000  | -0.890838000 |
| 6 | -0.407299000 | 3.436023000  | -0.852310000 |
| 6 | -1.142262000 | 2.303741000  | -0.537588000 |
| 1 | 2.718381000  | 2.140224000  | -0.647562000 |
| 1 | 1.551708000  | 4.259467000  | -1.142819000 |
| 1 | -0.917656000 | 4.366570000  | -1.071125000 |
| 1 | -2.225239000 | 2.355709000  | -0.513730000 |
| 6 | 2.821247000  | -0.406450000 | 0.041575000  |
| 6 | 3.559809000  | 0.126245000  | 1.091346000  |
| 6 | 3.454446000  | -1.167025000 | -0.929930000 |
| 6 | 4.921947000  | -0.099208000 | 1.162158000  |
| 1 | 3.047701000  | 0.710017000  | 1.850177000  |
| 6 | 4.818169000  | -1.398260000 | -0.850408000 |
| 1 | 2.864602000  | -1.571001000 | -1.746222000 |
| 6 | 5.554243000  | -0.862819000 | 0.191884000  |
| 1 | 5.493008000  | 0.314538000  | 1.985087000  |
| 1 | 5.306457000  | -1.997179000 | -1.610206000 |
| 1 | 6.621160000  | -1.041931000 | 0.252421000  |

**6Si-T** (T.E.= -1662.799844)

|   |              |             |              |
|---|--------------|-------------|--------------|
| 6 | 0.795339000  | 1.316522000 | -0.132262000 |
| 6 | -0.605048000 | 1.185411000 | 0.065529000  |

|    |              |              |              |
|----|--------------|--------------|--------------|
| 6  | -1.185609000 | -0.171568000 | -0.095224000 |
| 7  | 1.409638000  | 0.152847000  | -0.531425000 |
| 14 | 0.165847000  | -0.966386000 | -1.271434000 |
| 14 | -1.100839000 | -1.143448000 | 1.535434000  |
| 14 | -2.839838000 | -0.227285000 | -1.028283000 |
| 6  | -3.024829000 | -1.872602000 | -1.905499000 |
| 1  | -2.961978000 | -2.731857000 | -1.236104000 |
| 1  | -4.003472000 | -1.900279000 | -2.393439000 |
| 1  | -2.264736000 | -1.989080000 | -2.682994000 |
| 6  | -2.851835000 | 1.107589000  | -2.340721000 |
| 1  | -1.922054000 | 1.075309000  | -2.916507000 |
| 1  | -3.683101000 | 0.930553000  | -3.028313000 |
| 1  | -2.960845000 | 2.112792000  | -1.930748000 |
| 6  | -4.334053000 | -0.010628000 | 0.086705000  |
| 1  | -5.234706000 | -0.008533000 | -0.533849000 |
| 1  | -4.432229000 | -0.829200000 | 0.803627000  |
| 1  | -4.316040000 | 0.927377000  | 0.646078000  |
| 6  | -1.879013000 | -2.832152000 | 1.334165000  |
| 1  | -1.757423000 | -3.388319000 | 2.267693000  |
| 1  | -2.947269000 | -2.787491000 | 1.112757000  |
| 1  | -1.384044000 | -3.400332000 | 0.541697000  |
| 6  | 0.651155000  | -1.386828000 | 2.143576000  |
| 1  | 1.252398000  | -1.978937000 | 1.448192000  |
| 1  | 1.164230000  | -0.439316000 | 2.321961000  |
| 1  | 0.608997000  | -1.924181000 | 3.095611000  |
| 6  | -2.004574000 | -0.171256000 | 2.860590000  |
| 1  | -3.056675000 | -0.003587000 | 2.622917000  |
| 1  | -1.955760000 | -0.709599000 | 3.811050000  |
| 1  | -1.530379000 | 0.803168000  | 3.004723000  |
| 6  | 1.414607000  | 2.566692000  | -0.009313000 |
| 6  | 0.667288000  | 3.665955000  | 0.339703000  |
| 6  | -0.706492000 | 3.549491000  | 0.551467000  |
| 6  | -1.331839000 | 2.331165000  | 0.390988000  |
| 1  | 2.473880000  | 2.665183000  | -0.210540000 |
| 1  | 1.148013000  | 4.632232000  | 0.436678000  |
| 1  | -1.284840000 | 4.418633000  | 0.841240000  |
| 1  | -2.399839000 | 2.248108000  | 0.563432000  |
| 6  | 2.764416000  | -0.124904000 | -0.449815000 |
| 6  | 3.319695000  | -1.035728000 | -1.354014000 |
| 6  | 3.578435000  | 0.391642000  | 0.565077000  |

|   |             |              |              |
|---|-------------|--------------|--------------|
| 6 | 4.643405000 | -1.418790000 | -1.244020000 |
| 1 | 2.706431000 | -1.407591000 | -2.169036000 |
| 6 | 4.898810000 | 0.005118000  | 0.661271000  |
| 1 | 3.156646000 | 1.063363000  | 1.303031000  |
| 6 | 5.443160000 | -0.898355000 | -0.241685000 |
| 1 | 5.054787000 | -2.120790000 | -1.959918000 |
| 1 | 5.509541000 | 0.403916000  | 1.463082000  |
| 1 | 6.482527000 | -1.192455000 | -0.161512000 |

**7Si-S (T.E.= -924.355305)**

|    |              |              |              |
|----|--------------|--------------|--------------|
| 6  | -0.399829000 | -0.901968000 | 0.000096000  |
| 6  | -1.828218000 | -0.419494000 | 0.000022000  |
| 6  | -2.011723000 | 0.964146000  | -0.000427000 |
| 7  | 0.421214000  | 0.333684000  | -0.000342000 |
| 14 | -0.359466000 | 1.872645000  | -0.000508000 |
| 6  | 1.837724000  | 0.214946000  | -0.000022000 |
| 6  | 2.543924000  | 0.182293000  | -1.197721000 |
| 6  | 2.543853000  | 0.183788000  | 1.197681000  |
| 6  | 3.925427000  | 0.098058000  | -1.197143000 |
| 1  | 1.993376000  | 0.237641000  | -2.130606000 |
| 6  | 3.925394000  | 0.099538000  | 1.197218000  |
| 1  | 1.993327000  | 0.240143000  | 2.130498000  |
| 6  | 4.620204000  | 0.050766000  | 0.000104000  |
| 1  | 4.462024000  | 0.078792000  | -2.138739000 |
| 1  | 4.461947000  | 0.081445000  | 2.138861000  |
| 1  | 5.701931000  | -0.011535000 | 0.000184000  |
| 6  | -2.922513000 | -1.271845000 | 0.000449000  |
| 6  | -3.305964000 | 1.479496000  | -0.000458000 |
| 6  | -4.201847000 | -0.742823000 | 0.000426000  |
| 6  | -4.398597000 | 0.632074000  | -0.000037000 |
| 1  | -2.787684000 | -2.349595000 | 0.000788000  |
| 1  | -5.057183000 | -1.409121000 | 0.000761000  |
| 1  | -5.405341000 | 1.034355000  | -0.000075000 |
| 1  | -3.458936000 | 2.555354000  | -0.000844000 |
| 6  | -0.121409000 | -1.730179000 | 1.249125000  |
| 1  | 0.920751000  | -2.055613000 | 1.276839000  |
| 1  | -0.333462000 | -1.148633000 | 2.149324000  |
| 1  | -0.751407000 | -2.621769000 | 1.261426000  |
| 6  | -0.121556000 | -1.731205000 | -1.248338000 |
| 1  | -0.751704000 | -2.622677000 | -1.260050000 |

|   |              |              |              |
|---|--------------|--------------|--------------|
| 1 | -0.333371000 | -1.150311000 | -2.149019000 |
| 1 | 0.920541000  | -2.056835000 | -1.275682000 |

**7Si-T (T.E.= -924.269379 )**

|    |              |              |              |
|----|--------------|--------------|--------------|
| 6  | -0.432403000 | -0.948205000 | 0.000054000  |
| 6  | -1.850730000 | -0.371727000 | -0.000005000 |
| 6  | -2.031218000 | 1.020222000  | -0.000016000 |
| 7  | 0.505624000  | 0.200202000  | 0.000105000  |
| 14 | -0.350771000 | 1.721103000  | 0.000195000  |
| 6  | 1.889017000  | 0.123452000  | 0.000025000  |
| 6  | 2.640078000  | -1.058271000 | 0.000036000  |
| 6  | 2.611506000  | 1.327867000  | -0.000016000 |
| 6  | 4.023623000  | -1.022863000 | -0.000045000 |
| 1  | 2.156367000  | -2.022935000 | 0.000106000  |
| 6  | 3.989291000  | 1.354650000  | -0.000096000 |
| 1  | 2.068204000  | 2.273964000  | 0.000027000  |
| 6  | 4.716468000  | 0.174431000  | -0.000125000 |
| 1  | 4.565691000  | -1.962136000 | -0.000044000 |
| 1  | 4.499458000  | 2.311342000  | -0.000138000 |
| 1  | 5.799087000  | 0.190434000  | -0.000181000 |
| 6  | -2.972447000 | -1.184557000 | -0.000024000 |
| 6  | -3.311304000 | 1.573257000  | -0.000084000 |
| 6  | -4.246525000 | -0.636780000 | -0.000085000 |
| 6  | -4.412692000 | 0.742070000  | -0.000127000 |
| 1  | -2.860659000 | -2.264283000 | 0.000009000  |
| 1  | -5.111517000 | -1.289055000 | -0.000097000 |
| 1  | -5.409460000 | 1.168322000  | -0.000189000 |
| 1  | -3.441578000 | 2.649348000  | -0.000108000 |
| 6  | -0.264660000 | -1.771689000 | 1.275888000  |
| 1  | 0.733199000  | -2.196407000 | 1.371132000  |
| 1  | -0.448571000 | -1.136972000 | 2.145644000  |
| 1  | -0.982134000 | -2.593598000 | 1.296747000  |
| 6  | -0.264577000 | -1.771584000 | -1.275864000 |
| 1  | -0.982088000 | -2.593453000 | -1.296838000 |
| 1  | -0.448407000 | -1.136761000 | -2.145559000 |
| 1  | 0.733277000  | -2.196316000 | -1.371071000 |

**8Si-S (T.E.= -1153.213590 )**

|   |              |              |             |
|---|--------------|--------------|-------------|
| 6 | 0.507748000  | -1.586780000 | 0.088004000 |
| 6 | -0.950784000 | -1.514398000 | 0.509058000 |

|    |              |              |              |
|----|--------------|--------------|--------------|
| 6  | -1.474192000 | -0.173075000 | 0.034526000  |
| 1  | 1.078749000  | -2.250610000 | 0.747331000  |
| 1  | 0.582327000  | -2.002126000 | -0.929752000 |
| 1  | -1.021830000 | -1.601737000 | 1.603014000  |
| 1  | -1.494598000 | -2.374582000 | 0.096893000  |
| 14 | -0.164118000 | 1.036155000  | -0.185829000 |
| 7  | 1.050362000  | -0.233947000 | 0.122704000  |
| 15 | -3.129037000 | 0.133053000  | -0.047366000 |
| 6  | -4.026483000 | -0.922261000 | -1.210941000 |
| 1  | -3.845632000 | -1.968731000 | -0.958322000 |
| 1  | -5.100304000 | -0.728749000 | -1.174151000 |
| 1  | -3.653285000 | -0.739234000 | -2.219094000 |
| 6  | -4.023036000 | -0.123456000 | 1.505729000  |
| 1  | -3.631613000 | 0.557902000  | 2.262034000  |
| 1  | -5.094670000 | 0.042556000  | 1.379473000  |
| 1  | -3.861538000 | -1.148579000 | 1.845224000  |
| 6  | -3.491173000 | 1.820236000  | -0.547802000 |
| 1  | -3.070524000 | 2.520529000  | 0.174049000  |
| 1  | -3.053437000 | 2.017839000  | -1.526541000 |
| 1  | -4.572111000 | 1.959671000  | -0.601189000 |
| 6  | 2.425929000  | -0.067419000 | 0.052079000  |
| 6  | 3.296711000  | -1.116591000 | -0.264550000 |
| 6  | 2.997018000  | 1.187714000  | 0.310720000  |
| 6  | 4.666094000  | -0.912481000 | -0.322791000 |
| 1  | 2.903989000  | -2.101910000 | -0.481043000 |
| 6  | 4.359927000  | 1.381705000  | 0.239290000  |
| 1  | 2.346783000  | 2.012937000  | 0.581282000  |
| 6  | 5.213448000  | 0.332875000  | -0.076428000 |
| 1  | 5.311310000  | -1.748391000 | -0.571531000 |
| 1  | 4.764913000  | 2.366432000  | 0.446477000  |
| 1  | 6.284889000  | 0.486034000  | -0.122345000 |

**8Si-T (T.E.= -1153.123659)**

|   |              |             |              |
|---|--------------|-------------|--------------|
| 6 | -0.152890000 | 1.751506000 | 0.445430000  |
| 6 | 1.275525000  | 1.797965000 | 0.999773000  |
| 6 | 1.741279000  | 0.385200000 | 0.937318000  |
| 1 | -0.765782000 | 2.569246000 | 0.849144000  |
| 1 | -0.108647000 | 1.908107000 | -0.645342000 |
| 1 | 1.248417000  | 2.109728000 | 2.050669000  |
| 1 | 1.875722000  | 2.529850000 | 0.446194000  |

|    |              |              |              |
|----|--------------|--------------|--------------|
| 14 | 0.334542000  | -0.715304000 | 1.725798000  |
| 7  | -0.720302000 | 0.449022000  | 0.748205000  |
| 15 | 2.561828000  | -0.255407000 | -0.449155000 |
| 6  | 3.707850000  | 0.888318000  | -1.239097000 |
| 1  | 4.422985000  | 1.259059000  | -0.503992000 |
| 1  | 4.246202000  | 0.389646000  | -2.046640000 |
| 1  | 3.152611000  | 1.732299000  | -1.651589000 |
| 6  | 3.495830000  | -1.709645000 | 0.024198000  |
| 1  | 2.800235000  | -2.423557000 | 0.470780000  |
| 1  | 3.970547000  | -2.152454000 | -0.852918000 |
| 1  | 4.255146000  | -1.441318000 | 0.759002000  |
| 6  | 1.410674000  | -0.789257000 | -1.729718000 |
| 1  | 0.693747000  | -1.479252000 | -1.277379000 |
| 1  | 0.872912000  | 0.070952000  | -2.131864000 |
| 1  | 1.955716000  | -1.288600000 | -2.533174000 |
| 6  | -1.965601000 | 0.166930000  | 0.239009000  |
| 6  | -2.536051000 | -1.106968000 | 0.426701000  |
| 6  | -2.722704000 | 1.103608000  | -0.486205000 |
| 6  | -3.783295000 | -1.413548000 | -0.071923000 |
| 1  | -1.969252000 | -1.856059000 | 0.970108000  |
| 6  | -3.975222000 | 0.780070000  | -0.979529000 |
| 1  | -2.337200000 | 2.099672000  | -0.661298000 |
| 6  | -4.522254000 | -0.475658000 | -0.782054000 |
| 1  | -4.187704000 | -2.406179000 | 0.096251000  |
| 1  | -4.530662000 | 1.531476000  | -1.531149000 |
| 1  | -5.502731000 | -0.721535000 | -1.171505000 |

**9Si-S (T.E.= -1152.036609)**

|    |              |              |              |
|----|--------------|--------------|--------------|
| 6  | 0.451976000  | -1.430098000 | 0.486395000  |
| 6  | -0.899352000 | -1.434510000 | 0.454340000  |
| 6  | -1.463450000 | -0.170190000 | 0.060845000  |
| 14 | -0.158163000 | 1.063668000  | -0.270212000 |
| 7  | 1.030211000  | -0.215605000 | 0.159512000  |
| 15 | -3.140081000 | 0.077660000  | -0.051997000 |
| 6  | -3.969679000 | -1.065306000 | -1.174676000 |
| 1  | -3.777061000 | -2.087851000 | -0.845232000 |
| 1  | -5.046960000 | -0.890442000 | -1.190760000 |
| 1  | -3.559599000 | -0.941133000 | -2.177287000 |
| 6  | -3.534087000 | 1.729824000  | -0.632995000 |
| 1  | -4.616995000 | 1.857175000  | -0.668761000 |

|   |              |              |              |
|---|--------------|--------------|--------------|
| 1 | -3.104089000 | 2.469977000  | 0.042482000  |
| 1 | -3.119083000 | 1.879380000  | -1.630028000 |
| 6 | -4.019755000 | -0.126792000 | 1.510805000  |
| 1 | -3.645107000 | 0.602809000  | 2.229319000  |
| 1 | -5.095489000 | 0.003238000  | 1.378485000  |
| 1 | -3.823750000 | -1.127688000 | 1.899613000  |
| 6 | 2.424840000  | -0.084754000 | 0.070162000  |
| 6 | 3.229875000  | -1.127356000 | -0.386903000 |
| 6 | 3.034617000  | 1.117030000  | 0.427647000  |
| 6 | 4.601760000  | -0.970557000 | -0.475130000 |
| 1 | 2.770601000  | -2.058348000 | -0.698901000 |
| 6 | 4.404035000  | 1.272185000  | 0.321463000  |
| 1 | 2.416447000  | 1.925272000  | 0.803397000  |
| 6 | 5.199378000  | 0.228645000  | -0.124952000 |
| 1 | 5.208245000  | -1.794445000 | -0.834806000 |
| 1 | 4.855781000  | 2.215914000  | 0.606174000  |
| 1 | 6.273637000  | 0.348938000  | -0.197956000 |
| 1 | 1.079474000  | -2.261251000 | 0.785250000  |
| 1 | -1.472976000 | -2.317296000 | 0.723344000  |

**9Si-T (T.E.= -1151.955778)**

|    |              |              |              |
|----|--------------|--------------|--------------|
| 6  | -0.473241000 | 1.469862000  | -0.314561000 |
| 6  | 0.922884000  | 1.472572000  | -0.267275000 |
| 6  | 1.518748000  | 0.245274000  | -0.071470000 |
| 14 | 0.167158000  | -1.176100000 | -0.188285000 |
| 7  | -1.083879000 | 0.283046000  | -0.131568000 |
| 15 | 3.190857000  | -0.036259000 | 0.081822000  |
| 6  | 3.763014000  | -1.246525000 | -1.122070000 |
| 1  | 3.630279000  | -0.849834000 | -2.128872000 |
| 1  | 4.812596000  | -1.494182000 | -0.954657000 |
| 1  | 3.155687000  | -2.148750000 | -1.023688000 |
| 6  | 3.591206000  | -0.764534000 | 1.679790000  |
| 1  | 4.631750000  | -1.091718000 | 1.713813000  |
| 1  | 3.406062000  | -0.035478000 | 2.468946000  |
| 1  | 2.931792000  | -1.621101000 | 1.836520000  |
| 6  | 4.216588000  | 1.427701000  | -0.107488000 |
| 1  | 3.958442000  | 2.162526000  | 0.655589000  |
| 1  | 5.268418000  | 1.158025000  | -0.001782000 |
| 1  | 4.056984000  | 1.864228000  | -1.094073000 |
| 6  | -2.452196000 | 0.134399000  | -0.036874000 |



|   |              |              |              |
|---|--------------|--------------|--------------|
| 6 | -3.002025000 | -1.155780000 | -0.107311000 |
| 6 | -3.331804000 | 1.212940000  | 0.149794000  |
| 6 | -4.365818000 | -1.350351000 | -0.009045000 |
| 1 | -2.341021000 | -2.002253000 | -0.258425000 |
| 6 | -4.691441000 | 1.002537000  | 0.243960000  |
| 1 | -2.947235000 | 2.220408000  | 0.252268000  |
| 6 | -5.226402000 | -0.277852000 | 0.162712000  |
| 1 | -4.761463000 | -2.358163000 | -0.072563000 |
| 1 | -5.346946000 | 1.853207000  | 0.395928000  |
| 1 | -6.295674000 | -0.433464000 | 0.239112000  |
| 1 | -1.048118000 | 2.369138000  | -0.508736000 |
| 1 | 1.455445000  | 2.413911000  | -0.390710000 |

**10Si-S (T.E.= -1305.580320)**

|    |              |              |              |
|----|--------------|--------------|--------------|
| 6  | 0.493348000  | 1.017467000  | -0.096632000 |
| 6  | -0.921866000 | 0.967969000  | -0.056293000 |
| 6  | -1.423109000 | -0.385727000 | 0.020837000  |
| 14 | -0.067629000 | -1.604403000 | 0.037217000  |
| 7  | 1.077696000  | -0.242329000 | -0.054807000 |
| 6  | 1.157607000  | 2.232384000  | -0.216517000 |
| 6  | 0.432797000  | 3.410507000  | -0.271353000 |
| 6  | -0.953997000 | 3.384061000  | -0.211706000 |
| 6  | -1.621385000 | 2.176231000  | -0.109801000 |
| 1  | 2.239784000  | 2.255245000  | -0.273325000 |
| 1  | 0.954546000  | 4.356086000  | -0.364513000 |
| 1  | -1.517461000 | 4.309341000  | -0.251872000 |
| 1  | -2.707546000 | 2.180507000  | -0.077325000 |
| 15 | -3.071550000 | -0.794224000 | 0.079231000  |
| 6  | -3.964633000 | -0.128913000 | 1.500837000  |
| 1  | -3.869639000 | 0.956886000  | 1.523912000  |
| 1  | -5.021597000 | -0.397282000 | 1.454046000  |
| 1  | -3.523757000 | -0.532374000 | 2.413036000  |
| 6  | -3.300280000 | -2.574072000 | 0.167131000  |
| 1  | -4.367781000 | -2.793289000 | 0.224882000  |
| 1  | -2.883510000 | -3.048183000 | -0.721838000 |
| 1  | -2.799179000 | -2.974842000 | 1.048485000  |
| 6  | -4.037391000 | -0.273270000 | -1.355353000 |
| 1  | -3.623224000 | -0.745975000 | -2.246728000 |
| 1  | -5.083547000 | -0.562926000 | -1.239041000 |
| 1  | -3.973800000 | 0.808199000  | -1.477399000 |

|   |             |              |              |
|---|-------------|--------------|--------------|
| 6 | 2.478076000 | -0.414948000 | -0.005921000 |
| 6 | 3.241726000 | 0.146459000  | 1.014634000  |
| 6 | 3.107792000 | -1.205775000 | -0.960165000 |
| 6 | 4.605474000 | -0.072649000 | 1.068605000  |
| 1 | 2.749850000 | 0.746398000  | 1.772490000  |
| 6 | 4.472126000 | -1.434826000 | -0.894393000 |
| 1 | 2.510686000 | -1.636307000 | -1.756710000 |
| 6 | 5.227481000 | -0.865435000 | 0.115500000  |
| 1 | 5.186542000 | 0.368997000  | 1.870267000  |
| 1 | 4.947216000 | -2.056772000 | -1.644465000 |
| 1 | 6.296002000 | -1.039181000 | 0.163777000  |

**10Si-T (T.E.= -1305.485019)**

|    |              |              |              |
|----|--------------|--------------|--------------|
| 6  | -0.497933000 | 1.019111000  | -0.166651000 |
| 6  | 0.939157000  | 0.946491000  | -0.016863000 |
| 6  | 1.425491000  | -0.359223000 | 0.122095000  |
| 14 | 0.045688000  | -1.602079000 | -0.520643000 |
| 7  | -1.122142000 | -0.188368000 | -0.136048000 |
| 6  | -1.107347000 | 2.261046000  | -0.387343000 |
| 6  | -0.354365000 | 3.412921000  | -0.396322000 |
| 6  | 1.036161000  | 3.366732000  | -0.216583000 |
| 6  | 1.667244000  | 2.163390000  | -0.052995000 |
| 1  | -2.175459000 | 2.309152000  | -0.557268000 |
| 1  | -0.841067000 | 4.367249000  | -0.561901000 |
| 1  | 1.611752000  | 4.284729000  | -0.231685000 |
| 1  | 2.747339000  | 2.143685000  | 0.050871000  |
| 15 | 3.076965000  | -0.804100000 | 0.194544000  |
| 6  | 4.023744000  | -0.465896000 | -1.305511000 |
| 1  | 4.044146000  | 0.606013000  | -1.503424000 |
| 1  | 5.045073000  | -0.839498000 | -1.210429000 |
| 1  | 3.526171000  | -0.963787000 | -2.140140000 |
| 6  | 3.192499000  | -2.576641000 | 0.438537000  |
| 1  | 4.236528000  | -2.870848000 | 0.555783000  |
| 1  | 2.624091000  | -2.859124000 | 1.325643000  |
| 1  | 2.767499000  | -3.090515000 | -0.425785000 |
| 6  | 3.993982000  | -0.051258000 | 1.550586000  |
| 1  | 3.513776000  | -0.312286000 | 2.493872000  |
| 1  | 5.020523000  | -0.423074000 | 1.548291000  |
| 1  | 4.006123000  | 1.033403000  | 1.452165000  |
| 6  | -2.496389000 | -0.362450000 | -0.005636000 |

|   |              |              |              |
|---|--------------|--------------|--------------|
| 6 | -3.118469000 | -1.415582000 | -0.681783000 |
| 6 | -3.270528000 | 0.421859000  | 0.854767000  |
| 6 | -4.469742000 | -1.661591000 | -0.514364000 |
| 1 | -2.529540000 | -2.022251000 | -1.362178000 |
| 6 | -4.618759000 | 0.169696000  | 1.013175000  |
| 1 | -2.796431000 | 1.211816000  | 1.425532000  |
| 6 | -5.231685000 | -0.869894000 | 0.326729000  |
| 1 | -4.931300000 | -2.479789000 | -1.055877000 |
| 1 | -5.196522000 | 0.784808000  | 1.694219000  |
| 1 | -6.290187000 | -1.062765000 | 0.454463000  |

**11Si-S (T.E.= -1305.827806)**

|    |              |              |              |
|----|--------------|--------------|--------------|
| 6  | 0.468082000  | 1.252670000  | -0.000112000 |
| 6  | -1.061164000 | 1.111829000  | -0.000108000 |
| 6  | -1.497432000 | -0.246844000 | -0.000117000 |
| 7  | 1.012510000  | -0.114949000 | -0.000201000 |
| 6  | 2.416942000  | -0.296623000 | -0.000073000 |
| 6  | 3.118616000  | -0.408380000 | -1.196885000 |
| 6  | 4.488414000  | -0.608453000 | -1.196895000 |
| 6  | 5.178669000  | -0.703909000 | 0.000220000  |
| 6  | 4.488163000  | -0.608424000 | 1.197188000  |
| 6  | 3.118366000  | -0.408349000 | 1.196886000  |
| 1  | 5.018049000  | -0.697716000 | -2.138648000 |
| 1  | 6.250654000  | -0.863058000 | 0.000334000  |
| 1  | 5.017602000  | -0.697654000 | 2.139055000  |
| 6  | 0.876144000  | 2.018638000  | -1.248681000 |
| 1  | 1.957544000  | 2.173238000  | -1.275162000 |
| 1  | 0.580933000  | 1.473067000  | -2.149220000 |
| 1  | 0.383628000  | 2.992411000  | -1.254948000 |
| 6  | 0.876212000  | 2.018438000  | 1.248553000  |
| 1  | 0.383701000  | 2.992212000  | 1.254999000  |
| 1  | 0.581051000  | 1.472726000  | 2.149024000  |
| 1  | 1.957616000  | 2.173026000  | 1.274999000  |
| 15 | -3.186014000 | -0.509898000 | 0.000040000  |
| 6  | -4.030579000 | 0.181112000  | -1.430935000 |
| 1  | -5.105123000 | 0.000013000  | -1.366605000 |
| 1  | -3.836989000 | 1.253493000  | -1.459555000 |
| 1  | -3.634891000 | -0.278710000 | -2.337038000 |
| 6  | -3.552991000 | -2.267775000 | -0.000229000 |
| 1  | -3.122638000 | -2.735577000 | 0.886128000  |

|    |              |              |              |
|----|--------------|--------------|--------------|
| 1  | -4.633579000 | -2.418687000 | -0.000135000 |
| 1  | -3.122840000 | -2.735242000 | -0.886862000 |
| 6  | -4.030255000 | 0.180606000  | 1.431452000  |
| 1  | -3.836755000 | 1.252996000  | 1.460363000  |
| 1  | -5.104801000 | -0.000560000 | 1.367350000  |
| 1  | -3.634291000 | -0.279465000 | 2.337307000  |
| 1  | 2.568721000  | -0.344625000 | -2.129824000 |
| 1  | 2.568275000  | -0.344534000 | 2.129709000  |
| 8  | -1.772114000 | 2.117481000  | 0.000210000  |
| 14 | -0.107102000 | -1.440094000 | -0.000267000 |

**11Si-T (T.E.= -1305.728575 )**

|    |              |              |              |
|----|--------------|--------------|--------------|
| 6  | -0.446753000 | 1.333126000  | 0.000107000  |
| 6  | 1.084317000  | 1.110572000  | 0.000087000  |
| 6  | 1.525524000  | -0.235050000 | -0.000225000 |
| 7  | -1.102820000 | 0.005953000  | 0.000102000  |
| 6  | -2.463433000 | -0.220911000 | 0.000175000  |
| 6  | -2.903670000 | -1.556908000 | 0.000374000  |
| 6  | -4.242935000 | -1.884232000 | 0.000426000  |
| 6  | -5.211433000 | -0.892282000 | 0.000251000  |
| 6  | -4.798376000 | 0.429295000  | 0.000014000  |
| 6  | -3.456664000 | 0.767815000  | -0.000028000 |
| 1  | -4.532289000 | -2.929304000 | 0.000604000  |
| 1  | -6.264323000 | -1.145553000 | 0.000280000  |
| 1  | -5.534395000 | 1.225987000  | -0.000153000 |
| 6  | -0.760346000 | 2.113966000  | 1.272043000  |
| 1  | -1.812737000 | 2.382310000  | 1.350171000  |
| 1  | -0.498047000 | 1.514286000  | 2.147786000  |
| 1  | -0.166902000 | 3.028754000  | 1.287354000  |
| 6  | -0.760401000 | 2.113940000  | -1.271834000 |
| 1  | -0.167064000 | 3.028800000  | -1.287158000 |
| 1  | -0.498044000 | 1.514277000  | -2.147574000 |
| 1  | -1.812830000 | 2.382160000  | -1.349958000 |
| 15 | 3.202589000  | -0.549625000 | -0.000204000 |
| 6  | 4.057073000  | 0.112539000  | 1.434994000  |
| 1  | 5.125620000  | -0.101439000 | 1.373263000  |
| 1  | 3.895670000  | 1.190197000  | 1.463612000  |
| 1  | 3.642484000  | -0.336625000 | 2.337900000  |
| 6  | 3.473913000  | -2.322687000 | -0.001163000 |
| 1  | 3.014545000  | -2.758542000 | -0.889809000 |

|    |              |              |              |
|----|--------------|--------------|--------------|
| 1  | 4.542485000  | -2.541081000 | -0.001191000 |
| 1  | 3.014414000  | -2.759472000 | 0.886963000  |
| 6  | 4.057387000  | 0.114302000  | -1.434400000 |
| 1  | 3.895798000  | 1.191967000  | -1.461781000 |
| 1  | 5.125953000  | -0.099571000 | -1.372602000 |
| 1  | 3.643125000  | -0.333861000 | -2.337950000 |
| 1  | -2.162213000 | -2.357940000 | 0.000557000  |
| 1  | -3.191060000 | 1.814130000  | -0.000265000 |
| 8  | 1.838312000  | 2.089995000  | 0.000243000  |
| 14 | 0.056357000  | -1.309117000 | -0.000327000 |

**12Si-S (T.E.= -1305.824553)**

|    |              |              |              |
|----|--------------|--------------|--------------|
| 6  | 0.626872000  | 1.280217000  | -0.130567000 |
| 6  | -0.904771000 | 1.279185000  | -0.240659000 |
| 6  | -1.377799000 | -0.147817000 | -0.036060000 |
| 7  | 1.146519000  | 0.009132000  | -0.030825000 |
| 6  | 2.547956000  | -0.189718000 | 0.016418000  |
| 6  | 3.133110000  | -1.107006000 | -0.847333000 |
| 6  | 4.493897000  | -1.354988000 | -0.790914000 |
| 6  | 5.285997000  | -0.680887000 | 0.122376000  |
| 6  | 4.705619000  | 0.238031000  | 0.982588000  |
| 6  | 3.345448000  | 0.482330000  | 0.936017000  |
| 1  | 4.936114000  | -2.075171000 | -1.469697000 |
| 1  | 6.352205000  | -0.870259000 | 0.164882000  |
| 1  | 5.318363000  | 0.768555000  | 1.702553000  |
| 15 | -2.992800000 | -0.630816000 | 0.131141000  |
| 6  | -4.134968000 | -0.079294000 | -1.159791000 |
| 1  | -5.117264000 | -0.529820000 | -1.003614000 |
| 1  | -4.240504000 | 1.005911000  | -1.131233000 |
| 1  | -3.749420000 | -0.369928000 | -2.137610000 |
| 6  | -3.140386000 | -2.424992000 | 0.128798000  |
| 1  | -2.566934000 | -2.857318000 | 0.948945000  |
| 1  | -4.192164000 | -2.688567000 | 0.252614000  |
| 1  | -2.773795000 | -2.832885000 | -0.812957000 |
| 6  | -3.839698000 | -0.133508000 | 1.654531000  |
| 1  | -3.913968000 | 0.952262000  | 1.713370000  |
| 1  | -4.844710000 | -0.559988000 | 1.682944000  |
| 1  | -3.266843000 | -0.491297000 | 2.511012000  |
| 1  | 2.508127000  | -1.621790000 | -1.569583000 |
| 1  | 2.891337000  | 1.194907000  | 1.612624000  |

|    |              |              |              |
|----|--------------|--------------|--------------|
| 8  | 1.276924000  | 2.301629000  | -0.176210000 |
| 6  | -1.446999000 | 2.268759000  | 0.785427000  |
| 1  | -0.958900000 | 3.238741000  | 0.669834000  |
| 1  | -2.522760000 | 2.417143000  | 0.650143000  |
| 1  | -1.275329000 | 1.912301000  | 1.804458000  |
| 6  | -1.208930000 | 1.794375000  | -1.651241000 |
| 1  | -0.825480000 | 1.101403000  | -2.404243000 |
| 1  | -2.285021000 | 1.900947000  | -1.803662000 |
| 1  | -0.744854000 | 2.771367000  | -1.806220000 |
| 14 | -0.042093000 | -1.337811000 | 0.104731000  |

**12Si-T (T.E.= -1305.735428)**

|    |              |              |              |
|----|--------------|--------------|--------------|
| 6  | 0.355761000  | 1.293878000  | -0.292047000 |
| 6  | -1.093099000 | 1.551847000  | 0.216901000  |
| 6  | -1.555933000 | 0.203372000  | 0.662621000  |
| 7  | 0.920423000  | 0.206084000  | 0.304041000  |
| 6  | 2.273715000  | -0.119748000 | 0.056903000  |
| 6  | 2.619905000  | -1.453810000 | -0.130199000 |
| 6  | 3.939850000  | -1.818002000 | -0.330523000 |
| 6  | 4.933528000  | -0.854368000 | -0.349063000 |
| 6  | 4.593310000  | 0.476073000  | -0.159775000 |
| 6  | 3.276910000  | 0.845819000  | 0.044381000  |
| 1  | 4.190715000  | -2.862676000 | -0.476108000 |
| 1  | 5.967766000  | -1.136948000 | -0.507090000 |
| 1  | 5.364199000  | 1.238466000  | -0.166267000 |
| 15 | -2.636450000 | -0.848832000 | -0.201137000 |
| 6  | -1.784939000 | -1.644946000 | -1.575192000 |
| 1  | -2.403373000 | -2.438349000 | -1.998620000 |
| 1  | -1.556328000 | -0.906893000 | -2.345709000 |
| 1  | -0.852955000 | -2.067597000 | -1.190673000 |
| 6  | -3.174470000 | -2.154426000 | 0.906178000  |
| 1  | -3.698901000 | -1.719342000 | 1.757943000  |
| 1  | -3.843474000 | -2.831600000 | 0.372131000  |
| 1  | -2.299738000 | -2.699505000 | 1.265502000  |
| 6  | -4.164696000 | -0.155590000 | -0.865435000 |
| 1  | -3.961807000 | 0.524911000  | -1.690249000 |
| 1  | -4.794757000 | -0.973100000 | -1.220815000 |
| 1  | -4.693592000 | 0.383781000  | -0.078671000 |
| 1  | 1.833627000  | -2.202456000 | -0.112987000 |
| 1  | 3.015866000  | 1.885084000  | 0.194596000  |

|    |              |              |              |
|----|--------------|--------------|--------------|
| 8  | 0.869150000  | 2.021692000  | -1.117750000 |
| 6  | -0.968536000 | 2.511963000  | 1.409094000  |
| 1  | -0.471938000 | 3.430223000  | 1.086659000  |
| 1  | -1.961225000 | 2.768783000  | 1.786380000  |
| 1  | -0.396366000 | 2.065892000  | 2.225791000  |
| 6  | -1.898787000 | 2.233635000  | -0.874767000 |
| 1  | -1.961110000 | 1.623161000  | -1.780204000 |
| 1  | -2.909150000 | 2.456370000  | -0.522903000 |
| 1  | -1.422628000 | 3.172549000  | -1.158415000 |
| 14 | -0.079240000 | -0.720613000 | 1.576859000  |

**13Si-S (T.E.= -1347.354555)**

|    |              |              |              |
|----|--------------|--------------|--------------|
| 6  | 0.734374000  | 1.235795000  | 0.036571000  |
| 6  | -1.298790000 | -0.378076000 | -0.068497000 |
| 7  | 1.316194000  | -0.030729000 | -0.051132000 |
| 6  | 2.720058000  | -0.196913000 | -0.028784000 |
| 6  | 3.330814000  | -0.973054000 | -1.007411000 |
| 6  | 4.697756000  | -1.190584000 | -0.982868000 |
| 6  | 5.474384000  | -0.623852000 | 0.012560000  |
| 6  | 4.870604000  | 0.155778000  | 0.987259000  |
| 6  | 3.504257000  | 0.366770000  | 0.973085000  |
| 1  | 5.157050000  | -1.800966000 | -1.752080000 |
| 1  | 6.545539000  | -0.787564000 | 0.030440000  |
| 1  | 5.470410000  | 0.601686000  | 1.772655000  |
| 15 | -2.773230000 | -1.182890000 | 0.140440000  |
| 6  | -3.835274000 | -1.355566000 | -1.318625000 |
| 1  | -4.742937000 | -1.907578000 | -1.065526000 |
| 1  | -4.110898000 | -0.388617000 | -1.736625000 |
| 1  | -3.278073000 | -1.908704000 | -2.076808000 |
| 6  | -2.572435000 | -2.903234000 | 0.651697000  |
| 1  | -2.039554000 | -2.955116000 | 1.601608000  |
| 1  | -3.560058000 | -3.354071000 | 0.766145000  |
| 1  | -2.008509000 | -3.464314000 | -0.094127000 |
| 6  | -3.836434000 | -0.495080000 | 1.429444000  |
| 1  | -4.106713000 | 0.535324000  | 1.204289000  |
| 1  | -4.744432000 | -1.093221000 | 1.527981000  |
| 1  | -3.288258000 | -0.511742000 | 2.372417000  |
| 1  | 2.719956000  | -1.401775000 | -1.795045000 |
| 1  | 3.033680000  | 0.968277000  | 1.740073000  |
| 8  | 1.406036000  | 2.244745000  | 0.146423000  |

|    |              |              |              |
|----|--------------|--------------|--------------|
| 5  | -0.888383000 | 1.098250000  | -0.083720000 |
| 7  | -1.675357000 | 2.260593000  | -0.235158000 |
| 6  | -1.191847000 | 3.621482000  | -0.094162000 |
| 1  | -0.141515000 | 3.631784000  | 0.177868000  |
| 1  | -1.321750000 | 4.172469000  | -1.033342000 |
| 1  | -1.773175000 | 4.147018000  | 0.673365000  |
| 6  | -3.075667000 | 2.265505000  | -0.567278000 |
| 1  | -3.417612000 | 1.277968000  | -0.863604000 |
| 1  | -3.692906000 | 2.619524000  | 0.269836000  |
| 1  | -3.262461000 | 2.942196000  | -1.409325000 |
| 14 | 0.195546000  | -1.415093000 | -0.093108000 |

**<sup>13</sup>Si-T (T.E.= -1347.264565)**

|    |              |              |              |
|----|--------------|--------------|--------------|
| 6  | 0.703790000  | 1.251960000  | -0.191065000 |
| 6  | -1.325651000 | -0.373342000 | 0.179636000  |
| 7  | 1.361337000  | 0.027422000  | 0.008552000  |
| 6  | 2.756308000  | -0.152801000 | 0.004358000  |
| 6  | 3.257913000  | -1.417077000 | -0.306398000 |
| 6  | 4.615207000  | -1.675203000 | -0.266562000 |
| 6  | 5.504007000  | -0.669767000 | 0.073350000  |
| 6  | 5.012587000  | 0.589001000  | 0.380282000  |
| 6  | 3.655272000  | 0.854284000  | 0.352125000  |
| 1  | 4.978372000  | -2.666569000 | -0.512668000 |
| 1  | 6.569697000  | -0.864474000 | 0.097833000  |
| 1  | 5.697565000  | 1.383937000  | 0.653665000  |
| 15 | -2.780321000 | -1.211789000 | -0.030986000 |
| 6  | -3.845998000 | -0.513099000 | -1.306315000 |
| 1  | -4.730237000 | -1.140890000 | -1.431692000 |
| 1  | -4.158687000 | 0.494790000  | -1.036963000 |
| 1  | -3.291303000 | -0.470414000 | -2.244013000 |
| 6  | -2.495899000 | -2.914136000 | -0.550731000 |
| 1  | -1.930054000 | -3.445106000 | 0.217821000  |
| 1  | -3.451291000 | -3.420364000 | -0.699913000 |
| 1  | -1.922190000 | -2.922103000 | -1.478202000 |
| 6  | -3.842021000 | -1.409789000 | 1.420957000  |
| 1  | -4.181278000 | -0.443153000 | 1.791961000  |
| 1  | -4.711451000 | -2.023022000 | 1.174536000  |
| 1  | -3.264818000 | -1.899583000 | 2.206828000  |
| 1  | 2.562114000  | -2.196846000 | -0.612086000 |
| 1  | 3.282315000  | 1.837835000  | 0.594127000  |



|    |              |              |              |
|----|--------------|--------------|--------------|
| 8  | 1.321843000  | 2.273036000  | -0.464717000 |
| 5  | -0.888829000 | 1.088049000  | 0.018453000  |
| 7  | -1.729701000 | 2.233316000  | 0.067620000  |
| 6  | -1.366644000 | 3.541721000  | -0.435033000 |
| 1  | -0.359607000 | 3.529284000  | -0.840954000 |
| 1  | -2.071387000 | 3.860064000  | -1.214628000 |
| 1  | -1.411960000 | 4.289595000  | 0.366849000  |
| 6  | -3.046657000 | 2.246340000  | 0.639777000  |
| 1  | -3.833965000 | 2.393817000  | -0.114408000 |
| 1  | -3.244690000 | 1.323727000  | 1.183642000  |
| 1  | -3.140726000 | 3.074142000  | 1.353856000  |
| 14 | 0.233789000  | -1.294006000 | 0.295369000  |

**14Si-S (T.E.= -1347.372554)**

|    |              |              |              |
|----|--------------|--------------|--------------|
| 6  | 1.194731000  | 1.032195000  | 0.103260000  |
| 6  | 1.645395000  | -0.332384000 | -0.027699000 |
| 7  | -0.948504000 | -0.267052000 | -0.120462000 |
| 6  | -2.297465000 | -0.644724000 | 0.018656000  |
| 6  | -3.045659000 | -0.209258000 | 1.111106000  |
| 6  | -4.369072000 | -0.581157000 | 1.253984000  |
| 6  | -4.969184000 | -1.412995000 | 0.320528000  |
| 6  | -4.227983000 | -1.867409000 | -0.756819000 |
| 6  | -2.905197000 | -1.486500000 | -0.909237000 |
| 1  | -2.570267000 | 0.436182000  | 1.842669000  |
| 1  | -4.935627000 | -0.225437000 | 2.107280000  |
| 1  | -6.005891000 | -1.706565000 | 0.434857000  |
| 1  | -4.683841000 | -2.519663000 | -1.493279000 |
| 1  | -2.329501000 | -1.826028000 | -1.764004000 |
| 5  | -0.418187000 | 1.081972000  | -0.073384000 |
| 7  | -1.141224000 | 2.270592000  | -0.270783000 |
| 6  | -0.573659000 | 3.582108000  | -0.031648000 |
| 1  | -0.586540000 | 4.181502000  | -0.950062000 |
| 1  | -1.169301000 | 4.120202000  | 0.716153000  |
| 1  | 0.452734000  | 3.494133000  | 0.316397000  |
| 6  | -2.502031000 | 2.366153000  | -0.747941000 |
| 1  | -3.184858000 | 2.710868000  | 0.039372000  |
| 1  | -2.551118000 | 3.094655000  | -1.564917000 |
| 1  | -2.869496000 | 1.414029000  | -1.123191000 |
| 15 | 3.330591000  | -0.615164000 | 0.046257000  |
| 6  | 4.093145000  | -0.105765000 | 1.595514000  |

|    |             |              |              |
|----|-------------|--------------|--------------|
| 1  | 5.170682000 | -0.279038000 | 1.569435000  |
| 1  | 3.890908000 | 0.955057000  | 1.741985000  |
| 1  | 3.651083000 | -0.671243000 | 2.416356000  |
| 6  | 4.264211000 | 0.225229000  | -1.243431000 |
| 1  | 5.331069000 | 0.017446000  | -1.141408000 |
| 1  | 3.916111000 | -0.117267000 | -2.218451000 |
| 1  | 4.085654000 | 1.296630000  | -1.155699000 |
| 6  | 3.703105000 | -2.364011000 | -0.136090000 |
| 1  | 3.232789000 | -2.931066000 | 0.668128000  |
| 1  | 3.322318000 | -2.728309000 | -1.091010000 |
| 1  | 4.783378000 | -2.513453000 | -0.096954000 |
| 8  | 1.956558000 | 1.992598000  | 0.285906000  |
| 14 | 0.292529000 | -1.539964000 | -0.173587000 |

**14Si-T (T.E.= -1347.284273)**

|    |              |              |              |
|----|--------------|--------------|--------------|
| 6  | 1.166565000  | 1.007422000  | 0.111393000  |
| 6  | 1.645488000  | -0.350616000 | -0.020862000 |
| 7  | -0.987785000 | -0.230848000 | -0.231956000 |
| 6  | -2.320674000 | -0.614265000 | -0.025064000 |
| 6  | -3.114957000 | 0.007546000  | 0.938762000  |
| 6  | -4.409940000 | -0.418503000 | 1.163234000  |
| 6  | -4.940332000 | -1.481721000 | 0.447362000  |
| 6  | -4.154949000 | -2.114664000 | -0.500214000 |
| 6  | -2.861207000 | -1.683482000 | -0.738800000 |
| 1  | -2.694625000 | 0.822301000  | 1.517942000  |
| 1  | -5.008934000 | 0.078373000  | 1.918254000  |
| 1  | -5.955202000 | -1.813924000 | 0.630175000  |
| 1  | -4.552560000 | -2.947953000 | -1.068541000 |
| 1  | -2.254229000 | -2.157714000 | -1.505825000 |
| 5  | -0.406630000 | 1.104097000  | -0.123177000 |
| 7  | -1.110504000 | 2.313571000  | -0.310765000 |
| 6  | -0.573291000 | 3.594201000  | 0.091052000  |
| 1  | -0.529186000 | 4.280337000  | -0.763940000 |
| 1  | -1.214396000 | 4.061445000  | 0.850117000  |
| 1  | 0.430401000  | 3.473262000  | 0.494440000  |
| 6  | -2.405924000 | 2.433381000  | -0.930980000 |
| 1  | -3.178778000 | 2.743225000  | -0.214203000 |
| 1  | -2.368809000 | 3.193709000  | -1.720260000 |
| 1  | -2.722676000 | 1.492579000  | -1.378459000 |
| 15 | 3.332841000  | -0.632732000 | 0.083314000  |

|    |             |              |              |
|----|-------------|--------------|--------------|
| 6  | 4.035082000 | -0.177852000 | 1.673444000  |
| 1  | 5.113225000 | -0.348284000 | 1.678659000  |
| 1  | 3.822161000 | 0.876401000  | 1.848882000  |
| 1  | 3.564208000 | -0.774850000 | 2.454892000  |
| 6  | 4.285578000 | 0.247809000  | -1.160339000 |
| 1  | 5.350832000 | 0.042934000  | -1.038977000 |
| 1  | 3.959567000 | -0.070960000 | -2.150871000 |
| 1  | 4.091926000 | 1.313872000  | -1.043668000 |
| 6  | 3.678023000 | -2.379632000 | -0.149184000 |
| 1  | 3.166249000 | -2.959209000 | 0.620208000  |
| 1  | 3.319665000 | -2.695279000 | -1.130129000 |
| 1  | 4.752244000 | -2.557701000 | -0.081605000 |
| 8  | 1.986326000 | 1.934662000  | 0.312680000  |
| 14 | 0.255007000 | -1.468298000 | -0.332295000 |

**1Ge-S (T.E.= -3298.002081)**

|    |              |              |              |
|----|--------------|--------------|--------------|
| 6  | -0.906280000 | 0.472034000  | 1.600402000  |
| 6  | 0.538151000  | 0.038241000  | 1.712647000  |
| 6  | 1.201131000  | -0.014576000 | 0.316597000  |
| 1  | -1.464118000 | 0.218343000  | 2.509581000  |
| 1  | -0.977392000 | 1.565218000  | 1.485770000  |
| 1  | 0.551389000  | -0.959869000 | 2.165430000  |
| 1  | 1.074838000  | 0.694974000  | 2.407263000  |
| 32 | -0.265479000 | -0.676917000 | -0.890797000 |
| 7  | -1.480569000 | -0.208821000 | 0.450822000  |
| 14 | 1.608676000  | 1.720383000  | -0.322744000 |
| 14 | 2.631388000  | -1.233371000 | 0.299608000  |
| 6  | 2.075921000  | -2.838633000 | 1.105500000  |
| 1  | 1.140791000  | -3.207196000 | 0.671617000  |
| 1  | 2.838551000  | -3.604967000 | 0.942105000  |
| 1  | 1.930240000  | -2.745905000 | 2.183427000  |
| 6  | 3.184143000  | -1.691279000 | -1.432611000 |
| 1  | 3.653817000  | -0.866539000 | -1.968515000 |
| 1  | 3.915449000  | -2.501385000 | -1.361930000 |
| 1  | 2.350075000  | -2.056335000 | -2.038470000 |
| 6  | 4.100976000  | -0.588848000 | 1.270846000  |
| 1  | 3.800678000  | -0.284878000 | 2.277649000  |
| 1  | 4.860104000  | -1.369058000 | 1.372543000  |
| 1  | 4.570851000  | 0.270275000  | 0.785626000  |
| 6  | 2.857745000  | 1.713657000  | -1.719021000 |

|   |              |              |              |
|---|--------------|--------------|--------------|
| 1 | 2.502312000  | 1.116983000  | -2.563677000 |
| 1 | 2.979862000  | 2.742066000  | -2.071039000 |
| 1 | 3.841805000  | 1.341915000  | -1.428113000 |
| 6 | 0.103517000  | 2.590318000  | -1.053073000 |
| 1 | -0.752508000 | 2.637036000  | -0.376304000 |
| 1 | 0.385559000  | 3.617582000  | -1.303438000 |
| 1 | -0.231196000 | 2.119135000  | -1.982726000 |
| 6 | 2.251295000  | 2.795389000  | 1.072162000  |
| 1 | 1.469677000  | 3.026558000  | 1.799648000  |
| 1 | 3.081803000  | 2.330562000  | 1.607643000  |
| 1 | 2.605670000  | 3.743437000  | 0.658090000  |
| 6 | -2.864772000 | -0.178401000 | 0.277740000  |
| 6 | -3.485045000 | -1.096734000 | -0.576454000 |
| 6 | -3.671887000 | 0.753699000  | 0.933988000  |
| 6 | -4.847857000 | -1.063502000 | -0.784770000 |
| 1 | -2.879573000 | -1.852081000 | -1.067067000 |
| 6 | -5.041130000 | 0.774258000  | 0.724132000  |
| 1 | -3.227393000 | 1.478278000  | 1.604670000  |
| 6 | -5.640473000 | -0.126229000 | -0.136928000 |
| 1 | -5.300202000 | -1.788613000 | -1.451986000 |
| 1 | -5.643398000 | 1.510891000  | 1.244286000  |
| 1 | -6.711869000 | -0.107891000 | -0.295372000 |

**1Ge-T (T.E.= -3297.925808)**

|    |              |              |              |
|----|--------------|--------------|--------------|
| 6  | -0.637830000 | -1.468691000 | 1.441408000  |
| 6  | 1.041728000  | 0.023315000  | 0.282622000  |
| 6  | 0.327600000  | -0.307980000 | 1.621563000  |
| 1  | -1.275059000 | -1.628268000 | 2.313976000  |
| 1  | -0.078445000 | -2.394933000 | 1.260460000  |
| 1  | 1.029876000  | -0.534859000 | 2.434744000  |
| 1  | -0.263054000 | 0.546735000  | 1.981420000  |
| 32 | 0.062803000  | -0.962669000 | -1.286279000 |
| 7  | -1.377000000 | -1.187259000 | 0.231571000  |
| 14 | 2.764700000  | -0.705494000 | 0.257683000  |
| 14 | 0.903108000  | 1.859072000  | -0.044158000 |
| 6  | 1.834272000  | 2.393941000  | -1.581339000 |
| 1  | 1.544599000  | 1.798263000  | -2.451733000 |
| 1  | 1.605073000  | 3.440320000  | -1.800751000 |
| 1  | 2.916688000  | 2.312394000  | -1.454868000 |
| 6  | 1.550861000  | 2.875270000  | 1.404072000  |

|   |              |              |              |
|---|--------------|--------------|--------------|
| 1 | 2.634474000  | 2.793653000  | 1.507317000  |
| 1 | 1.307433000  | 3.930896000  | 1.252785000  |
| 1 | 1.102431000  | 2.568992000  | 2.353028000  |
| 6 | -0.894731000 | 2.373403000  | -0.271468000 |
| 1 | -1.532199000 | 2.083333000  | 0.569083000  |
| 1 | -0.947303000 | 3.462427000  | -0.360942000 |
| 1 | -1.318171000 | 1.937646000  | -1.180543000 |
| 6 | 2.742378000  | -2.473254000 | 0.898210000  |
| 1 | 2.092718000  | -3.102576000 | 0.283072000  |
| 1 | 3.754360000  | -2.885539000 | 0.851509000  |
| 1 | 2.409276000  | -2.542882000 | 1.936834000  |
| 6 | 3.952581000  | 0.253933000  | 1.356866000  |
| 1 | 4.893054000  | -0.294414000 | 1.461215000  |
| 1 | 4.184008000  | 1.235674000  | 0.936496000  |
| 1 | 3.542002000  | 0.407555000  | 2.358819000  |
| 6 | 3.499371000  | -0.762797000 | -1.467801000 |
| 1 | 3.594278000  | 0.224966000  | -1.921656000 |
| 1 | 4.499953000  | -1.201301000 | -1.411301000 |
| 1 | 2.905338000  | -1.389920000 | -2.138692000 |
| 6 | -2.621941000 | -0.717431000 | 0.225935000  |
| 6 | -3.230511000 | -0.449923000 | -1.034409000 |
| 6 | -3.367273000 | -0.417200000 | 1.400569000  |
| 6 | -4.480147000 | 0.107431000  | -1.106341000 |
| 1 | -2.671298000 | -0.696843000 | -1.930329000 |
| 6 | -4.613231000 | 0.145351000  | 1.304350000  |
| 1 | -2.935305000 | -0.595597000 | 2.376095000  |
| 6 | -5.180175000 | 0.413980000  | 0.058040000  |
| 1 | -4.925239000 | 0.306825000  | -2.073542000 |
| 1 | -5.160283000 | 0.390399000  | 2.206855000  |
| 1 | -6.166917000 | 0.857091000  | -0.002450000 |

**2Ge-S (T.E.= -3296.819575)**

|    |              |              |              |
|----|--------------|--------------|--------------|
| 6  | 1.160636000  | 0.020105000  | 0.272281000  |
| 6  | 0.479656000  | 0.201119000  | 1.576070000  |
| 6  | -0.859238000 | 0.133402000  | 1.582194000  |
| 1  | 1.030867000  | 0.360060000  | 2.499051000  |
| 1  | -1.471265000 | 0.224684000  | 2.473819000  |
| 32 | -0.283273000 | -0.298991000 | -1.079470000 |
| 7  | -1.483373000 | -0.123347000 | 0.373988000  |
| 14 | 2.299409000  | -1.481276000 | 0.316765000  |

|    |              |              |              |
|----|--------------|--------------|--------------|
| 14 | 1.961209000  | 1.673230000  | -0.183479000 |
| 6  | 2.816705000  | -2.014395000 | -1.403778000 |
| 1  | 3.494102000  | -2.869438000 | -1.325894000 |
| 1  | 1.956290000  | -2.329499000 | -2.000354000 |
| 1  | 3.336058000  | -1.228385000 | -1.954278000 |
| 6  | 2.988122000  | 2.333532000  | 1.236161000  |
| 1  | 3.780935000  | 1.647154000  | 1.538109000  |
| 1  | 3.455123000  | 3.273987000  | 0.930442000  |
| 1  | 2.365778000  | 2.542229000  | 2.109082000  |
| 6  | 3.039964000  | 1.538912000  | -1.708826000 |
| 1  | 2.500717000  | 1.098493000  | -2.552074000 |
| 1  | 3.362352000  | 2.540149000  | -2.007789000 |
| 1  | 3.938519000  | 0.943155000  | -1.532790000 |
| 6  | 0.615960000  | 2.935726000  | -0.530362000 |
| 1  | 0.129261000  | 2.761092000  | -1.493905000 |
| 1  | -0.152137000 | 2.920994000  | 0.247897000  |
| 1  | 1.043428000  | 3.941867000  | -0.555980000 |
| 6  | 3.839425000  | -1.167763000 | 1.338466000  |
| 1  | 4.372762000  | -2.110481000 | 1.489851000  |
| 1  | 4.526760000  | -0.474180000 | 0.848025000  |
| 1  | 3.595943000  | -0.761738000 | 2.323693000  |
| 6  | 1.364672000  | -2.901151000 | 1.103774000  |
| 1  | 1.971950000  | -3.809990000 | 1.082685000  |
| 1  | 1.114203000  | -2.686689000 | 2.144689000  |
| 1  | 0.431571000  | -3.110586000 | 0.572357000  |
| 6  | -2.882575000 | -0.084359000 | 0.262051000  |
| 6  | -3.532013000 | -0.959725000 | -0.605641000 |
| 6  | -3.643702000 | 0.835507000  | 0.981072000  |
| 6  | -4.904995000 | -0.909357000 | -0.756093000 |
| 1  | -2.945492000 | -1.693346000 | -1.149134000 |
| 6  | -5.018929000 | 0.869519000  | 0.837020000  |
| 1  | -3.148360000 | 1.544445000  | 1.635004000  |
| 6  | -5.658237000 | 0.001164000  | -0.032188000 |
| 1  | -5.392153000 | -1.599507000 | -1.435249000 |
| 1  | -5.595006000 | 1.593126000  | 1.402609000  |
| 1  | -6.735246000 | 0.032759000  | -0.143969000 |

**2Ge-T (T.E.= -3296.757434)**

|   |             |              |             |
|---|-------------|--------------|-------------|
| 6 | 1.234983000 | 0.007376000  | 0.323765000 |
| 6 | 0.548269000 | -0.038596000 | 1.599072000 |

|    |              |              |              |
|----|--------------|--------------|--------------|
| 6  | -0.829557000 | -0.108314000 | 1.643283000  |
| 1  | 1.088910000  | -0.072228000 | 2.545772000  |
| 1  | -1.379027000 | -0.045551000 | 2.580748000  |
| 32 | -0.125883000 | -1.035198000 | -0.916028000 |
| 7  | -1.469828000 | -0.329373000 | 0.497098000  |
| 14 | 2.873769000  | -0.928525000 | 0.363908000  |
| 14 | 1.237154000  | 1.770565000  | -0.377435000 |
| 6  | 3.344544000  | -1.512104000 | -1.351836000 |
| 1  | 4.284228000  | -2.068635000 | -1.296595000 |
| 1  | 2.586297000  | -2.190403000 | -1.754001000 |
| 1  | 3.481307000  | -0.696380000 | -2.062732000 |
| 6  | 2.100586000  | 2.916631000  | 0.833803000  |
| 1  | 3.161112000  | 2.690087000  | 0.952269000  |
| 1  | 2.013394000  | 3.952766000  | 0.495448000  |
| 1  | 1.629256000  | 2.847989000  | 1.818540000  |
| 6  | 2.117906000  | 1.812915000  | -2.026918000 |
| 1  | 1.640505000  | 1.138670000  | -2.743229000 |
| 1  | 2.066880000  | 2.826226000  | -2.434217000 |
| 1  | 3.172285000  | 1.540402000  | -1.945861000 |
| 6  | -0.485688000 | 2.469726000  | -0.605331000 |
| 1  | -1.077510000 | 1.903909000  | -1.329230000 |
| 1  | -1.038917000 | 2.511403000  | 0.336193000  |
| 1  | -0.386579000 | 3.494757000  | -0.975122000 |
| 6  | 4.266733000  | 0.094558000  | 1.089072000  |
| 1  | 5.149417000  | -0.532900000 | 1.237988000  |
| 1  | 4.552291000  | 0.925373000  | 0.440060000  |
| 1  | 3.983050000  | 0.508936000  | 2.060700000  |
| 6  | 2.634489000  | -2.447793000 | 1.434592000  |
| 1  | 3.493637000  | -3.117065000 | 1.342526000  |
| 1  | 2.519875000  | -2.194651000 | 2.491221000  |
| 1  | 1.739917000  | -2.993446000 | 1.118600000  |
| 6  | -2.839668000 | -0.242937000 | 0.350875000  |
| 6  | -3.444766000 | -0.896461000 | -0.727814000 |
| 6  | -3.639056000 | 0.516279000  | 1.213642000  |
| 6  | -4.808062000 | -0.807372000 | -0.924617000 |
| 1  | -2.830765000 | -1.496102000 | -1.391938000 |
| 6  | -5.000979000 | 0.595988000  | 1.007821000  |
| 1  | -3.180367000 | 1.075302000  | 2.021293000  |
| 6  | -5.595173000 | -0.066195000 | -0.057552000 |
| 1  | -5.261615000 | -1.326558000 | -1.760740000 |

|   |              |             |              |
|---|--------------|-------------|--------------|
| 1 | -5.606057000 | 1.195817000 | 1.677824000  |
| 1 | -6.664748000 | 0.003455000 | -0.214074000 |

**3Ge-S (T.E.= -3418.104528)**

|    |              |              |              |
|----|--------------|--------------|--------------|
| 6  | 0.712845000  | 1.068008000  | -1.025784000 |
| 6  | 1.420703000  | 0.002193000  | -0.142157000 |
| 1  | 1.195287000  | 2.050431000  | -0.934012000 |
| 1  | 0.823706000  | 0.812278000  | -2.091842000 |
| 7  | -1.317868000 | -0.139695000 | -0.136991000 |
| 5  | -0.834858000 | 1.110698000  | -0.696095000 |
| 7  | -1.619936000 | 2.270069000  | -0.893346000 |
| 6  | -1.108401000 | 3.421567000  | -1.599014000 |
| 1  | -1.864635000 | 3.812341000  | -2.289591000 |
| 1  | -0.845438000 | 4.235741000  | -0.908969000 |
| 1  | -0.226347000 | 3.168675000  | -2.184603000 |
| 6  | -2.904185000 | 2.547420000  | -0.292467000 |
| 1  | -3.701383000 | 2.622499000  | -1.043000000 |
| 1  | -3.187195000 | 1.781227000  | 0.426163000  |
| 1  | -2.861889000 | 3.505306000  | 0.240328000  |
| 14 | 1.984524000  | 0.814782000  | 1.458184000  |
| 14 | 2.751890000  | -0.879005000 | -1.122455000 |
| 6  | 0.617935000  | 1.919107000  | 2.127368000  |
| 1  | -0.297573000 | 1.359230000  | 2.342842000  |
| 1  | 0.954180000  | 2.379184000  | 3.060771000  |
| 1  | 0.359370000  | 2.725475000  | 1.435538000  |
| 6  | 3.490484000  | 1.901995000  | 1.198505000  |
| 1  | 3.685843000  | 2.477501000  | 2.107541000  |
| 1  | 4.385909000  | 1.318185000  | 0.974256000  |
| 1  | 3.335342000  | 2.609733000  | 0.380225000  |
| 6  | 3.880650000  | 0.335289000  | -1.998833000 |
| 1  | 4.541896000  | -0.205366000 | -2.681565000 |
| 1  | 3.311033000  | 1.055838000  | -2.590345000 |
| 1  | 4.506091000  | 0.895635000  | -1.301595000 |
| 6  | 3.789520000  | -2.037736000 | -0.074810000 |
| 1  | 4.446479000  | -2.624955000 | -0.722172000 |
| 1  | 4.420371000  | -1.505400000 | 0.640916000  |
| 1  | 3.164414000  | -2.739730000 | 0.484798000  |
| 6  | 2.372058000  | -0.440000000 | 2.799987000  |
| 1  | 3.147301000  | -1.150709000 | 2.507352000  |
| 1  | 2.720619000  | 0.085137000  | 3.693841000  |



|    |              |              |              |
|----|--------------|--------------|--------------|
| 1  | 1.486481000  | -1.015609000 | 3.086863000  |
| 6  | 1.910807000  | -1.929379000 | -2.438490000 |
| 1  | 1.420618000  | -2.800634000 | -1.992320000 |
| 1  | 1.152696000  | -1.366894000 | -2.990488000 |
| 1  | 2.639843000  | -2.301803000 | -3.163048000 |
| 32 | 0.028204000  | -1.339822000 | 0.380640000  |
| 6  | -2.661740000 | -0.529495000 | 0.001444000  |
| 6  | -3.504635000 | -0.587879000 | -1.106930000 |
| 6  | -3.173328000 | -0.883260000 | 1.247777000  |
| 6  | -4.825834000 | -0.968375000 | -0.965639000 |
| 1  | -3.105967000 | -0.322844000 | -2.080756000 |
| 6  | -4.495256000 | -1.271428000 | 1.384595000  |
| 1  | -2.523037000 | -0.822606000 | 2.115534000  |
| 6  | -5.329471000 | -1.311338000 | 0.280432000  |
| 1  | -5.468421000 | -1.003413000 | -1.838182000 |
| 1  | -4.876531000 | -1.537152000 | 2.364020000  |
| 1  | -6.365388000 | -1.610121000 | 0.387750000  |

**3Ge-T (T.E.= -3418.024983)**

|    |              |              |              |
|----|--------------|--------------|--------------|
| 6  | -0.725276000 | 0.863865000  | -1.203141000 |
| 6  | -1.518214000 | 0.048968000  | -0.197154000 |
| 1  | -0.796629000 | 0.437792000  | -2.213285000 |
| 1  | -1.163265000 | 1.870034000  | -1.250341000 |
| 7  | 1.393273000  | -0.168820000 | -0.223633000 |
| 5  | 0.839140000  | 0.998031000  | -0.817963000 |
| 7  | 1.507223000  | 2.238398000  | -0.986339000 |
| 6  | 0.937906000  | 3.349477000  | -1.709596000 |
| 1  | 0.498517000  | 4.096211000  | -1.030657000 |
| 1  | 1.712130000  | 3.858265000  | -2.294420000 |
| 1  | 0.168231000  | 3.023209000  | -2.407386000 |
| 6  | 2.701595000  | 2.625093000  | -0.271855000 |
| 1  | 2.521559000  | 3.566231000  | 0.263674000  |
| 1  | 2.986005000  | 1.875520000  | 0.464043000  |
| 1  | 3.553630000  | 2.786391000  | -0.944282000 |
| 14 | -2.871670000 | -1.034109000 | -0.952480000 |
| 14 | -1.843375000 | 1.012832000  | 1.402258000  |
| 6  | -2.337787000 | -1.690775000 | -2.620723000 |
| 1  | -1.372135000 | -2.199172000 | -2.559463000 |
| 1  | -3.080173000 | -2.412982000 | -2.971214000 |
| 1  | -2.265399000 | -0.901418000 | -3.372024000 |

|    |              |              |              |
|----|--------------|--------------|--------------|
| 6  | -4.376348000 | 0.057206000  | -1.218958000 |
| 1  | -5.120984000 | -0.478050000 | -1.813927000 |
| 1  | -4.846680000 | 0.353774000  | -0.278850000 |
| 1  | -4.099017000 | 0.964787000  | -1.762498000 |
| 6  | -2.883774000 | 2.519932000  | 0.977676000  |
| 1  | -3.087592000 | 3.078859000  | 1.895415000  |
| 1  | -2.347848000 | 3.189497000  | 0.299322000  |
| 1  | -3.840744000 | 2.264944000  | 0.519957000  |
| 6  | -2.758609000 | -0.018432000 | 2.664541000  |
| 1  | -2.820446000 | 0.539568000  | 3.602632000  |
| 1  | -3.780008000 | -0.241817000 | 2.347440000  |
| 1  | -2.246592000 | -0.962186000 | 2.869120000  |
| 6  | -3.332734000 | -2.475832000 | 0.144223000  |
| 1  | -3.680313000 | -2.158905000 | 1.128394000  |
| 1  | -4.140615000 | -3.040235000 | -0.329517000 |
| 1  | -2.492109000 | -3.161046000 | 0.283525000  |
| 6  | -0.271351000 | 1.689822000  | 2.167268000  |
| 1  | 0.444703000  | 0.910130000  | 2.438591000  |
| 1  | 0.227829000  | 2.399598000  | 1.500565000  |
| 1  | -0.545252000 | 2.232183000  | 3.077177000  |
| 32 | -0.007451000 | -1.370991000 | 0.307329000  |
| 6  | 2.723713000  | -0.536125000 | -0.035147000 |
| 6  | 3.674293000  | -0.353495000 | -1.041924000 |
| 6  | 3.132463000  | -1.137130000 | 1.156901000  |
| 6  | 4.988602000  | -0.733860000 | -0.849188000 |
| 1  | 3.361027000  | 0.091679000  | -1.980536000 |
| 6  | 4.447969000  | -1.524335000 | 1.341079000  |
| 1  | 2.399332000  | -1.278170000 | 1.948150000  |
| 6  | 5.386448000  | -1.321660000 | 0.342233000  |
| 1  | 5.710070000  | -0.579815000 | -1.644034000 |
| 1  | 4.742993000  | -1.983356000 | 2.278152000  |
| 1  | 6.416287000  | -1.625446000 | 0.487056000  |

**4Ge-S (T.E.= -3628.014139)**

|    |              |              |             |
|----|--------------|--------------|-------------|
| 6  | 0.882131000  | 0.522121000  | 1.530503000 |
| 6  | 1.399307000  | 0.034347000  | 0.143079000 |
| 1  | 1.096970000  | -0.212515000 | 2.317974000 |
| 1  | 1.398235000  | 1.432121000  | 1.862521000 |
| 7  | -1.429084000 | 0.138905000  | 0.002051000 |
| 14 | 2.309491000  | -1.592388000 | 0.405121000 |

|    |              |              |              |
|----|--------------|--------------|--------------|
| 14 | 2.419501000  | 1.382634000  | -0.676812000 |
| 6  | 1.039295000  | -2.886893000 | 0.911570000  |
| 1  | 0.374725000  | -3.146553000 | 0.080404000  |
| 1  | 1.533091000  | -3.808658000 | 1.230497000  |
| 1  | 0.414871000  | -2.541639000 | 1.740479000  |
| 6  | 3.589880000  | -1.485014000 | 1.772318000  |
| 1  | 4.006861000  | -2.481861000 | 1.942617000  |
| 1  | 4.413689000  | -0.819081000 | 1.507360000  |
| 1  | 3.169536000  | -1.138284000 | 2.718406000  |
| 6  | 4.047214000  | 1.659053000  | 0.212094000  |
| 1  | 4.741079000  | 0.834652000  | 0.028462000  |
| 1  | 4.518438000  | 2.577321000  | -0.148696000 |
| 1  | 3.912906000  | 1.751179000  | 1.292742000  |
| 6  | 2.793800000  | 1.040576000  | -2.483566000 |
| 1  | 3.374191000  | 1.879482000  | -2.878796000 |
| 1  | 3.377570000  | 0.132158000  | -2.638507000 |
| 1  | 1.885701000  | 0.961043000  | -3.087264000 |
| 6  | 3.178500000  | -2.213205000 | -1.135282000 |
| 1  | 4.057809000  | -1.607911000 | -1.369772000 |
| 1  | 3.520367000  | -3.238071000 | -0.966449000 |
| 1  | 2.526471000  | -2.218958000 | -2.012605000 |
| 6  | 1.448546000  | 2.990720000  | -0.648788000 |
| 1  | 0.520622000  | 2.895703000  | -1.222233000 |
| 1  | 1.187970000  | 3.319376000  | 0.359952000  |
| 1  | 2.041011000  | 3.784044000  | -1.112818000 |
| 14 | -0.977565000 | 0.792556000  | 1.559455000  |
| 6  | -1.453443000 | 2.588870000  | 1.759125000  |
| 1  | -1.129349000 | 3.184896000  | 0.903157000  |
| 1  | -2.534509000 | 2.703368000  | 1.868118000  |
| 1  | -0.984543000 | 3.003156000  | 2.656003000  |
| 6  | -1.813180000 | -0.200421000 | 2.902206000  |
| 1  | -1.573127000 | -1.262622000 | 2.802926000  |
| 1  | -1.496227000 | 0.129512000  | 3.894503000  |
| 1  | -2.899748000 | -0.095305000 | 2.845947000  |
| 32 | -0.088846000 | -0.435553000 | -1.145742000 |
| 6  | -2.783665000 | -0.086186000 | -0.315151000 |
| 6  | -3.271072000 | -1.385909000 | -0.441428000 |
| 6  | -3.667250000 | 0.977291000  | -0.492393000 |
| 6  | -4.602021000 | -1.614888000 | -0.744105000 |
| 1  | -2.587513000 | -2.214706000 | -0.280169000 |

|   |              |              |              |
|---|--------------|--------------|--------------|
| 6 | -4.998778000 | 0.743987000  | -0.786864000 |
| 1 | -3.288304000 | 1.990630000  | -0.410540000 |
| 6 | -5.473216000 | -0.551910000 | -0.915183000 |
| 1 | -4.961670000 | -2.633232000 | -0.839029000 |
| 1 | -5.670814000 | 1.583431000  | -0.925031000 |
| 1 | -6.515933000 | -0.731765000 | -1.148275000 |

**4Ge-T** (T.E.= -3627.937085)

|    |              |              |              |
|----|--------------|--------------|--------------|
| 6  | -0.968673000 | 0.939357000  | 1.327547000  |
| 6  | -1.482268000 | -0.031868000 | 0.296466000  |
| 1  | -1.639694000 | 1.794857000  | 1.477518000  |
| 1  | -0.845892000 | 0.457291000  | 2.307720000  |
| 7  | 1.465463000  | 0.528805000  | -0.101716000 |
| 14 | -2.958223000 | 0.623901000  | -0.685704000 |
| 14 | -1.425925000 | -1.825023000 | 0.900670000  |
| 6  | -2.759560000 | 2.451427000  | -1.034225000 |
| 1  | -1.882746000 | 2.627173000  | -1.663206000 |
| 1  | -3.640745000 | 2.808336000  | -1.574408000 |
| 1  | -2.659771000 | 3.056007000  | -0.130461000 |
| 6  | -4.472899000 | 0.365801000  | 0.392085000  |
| 1  | -5.334497000 | 0.878681000  | -0.043007000 |
| 1  | -4.721143000 | -0.694856000 | 0.478166000  |
| 1  | -4.315951000 | 0.759200000  | 1.399923000  |
| 6  | -2.556046000 | -1.954039000 | 2.398104000  |
| 1  | -3.606656000 | -1.823034000 | 2.133295000  |
| 1  | -2.444718000 | -2.946724000 | 2.843529000  |
| 1  | -2.306129000 | -1.217280000 | 3.164840000  |
| 6  | -2.037217000 | -3.035440000 | -0.384493000 |
| 1  | -1.932492000 | -4.050196000 | 0.008894000  |
| 1  | -3.095257000 | -2.877496000 | -0.608207000 |
| 1  | -1.470574000 | -2.977914000 | -1.316850000 |
| 6  | -3.220171000 | -0.245565000 | -2.319986000 |
| 1  | -3.284435000 | -1.330223000 | -2.223867000 |
| 1  | -4.161229000 | 0.106547000  | -2.752379000 |
| 1  | -2.424594000 | -0.011652000 | -3.031834000 |
| 6  | 0.294310000  | -2.298513000 | 1.464402000  |
| 1  | 1.011022000  | -2.311870000 | 0.639655000  |
| 1  | 0.673760000  | -1.619246000 | 2.232496000  |
| 1  | 0.257858000  | -3.299998000 | 1.902476000  |
| 14 | 0.775690000  | 1.669837000  | 0.997177000  |

|    |             |              |              |
|----|-------------|--------------|--------------|
| 6  | 1.589849000 | 1.836579000  | 2.669645000  |
| 1  | 1.678351000 | 0.880067000  | 3.188632000  |
| 1  | 2.579331000 | 2.292238000  | 2.600130000  |
| 1  | 0.963847000 | 2.493297000  | 3.281159000  |
| 6  | 0.643836000 | 3.361612000  | 0.222816000  |
| 1  | 0.179525000 | 3.300553000  | -0.764468000 |
| 1  | 0.044670000 | 4.033891000  | 0.843062000  |
| 1  | 1.635858000 | 3.804534000  | 0.104412000  |
| 32 | 0.073730000 | -0.066567000 | -1.279424000 |
| 6  | 2.755008000 | 0.055266000  | -0.278939000 |
| 6  | 3.177812000 | -0.390781000 | -1.539108000 |
| 6  | 3.673847000 | -0.041155000 | 0.774319000  |
| 6  | 4.438736000 | -0.925645000 | -1.729238000 |
| 1  | 2.509216000 | -0.280115000 | -2.389152000 |
| 6  | 4.937289000 | -0.562984000 | 0.573552000  |
| 1  | 3.378405000 | 0.269397000  | 1.768412000  |
| 6  | 5.333211000 | -1.014389000 | -0.676398000 |
| 1  | 4.728496000 | -1.260694000 | -2.719114000 |
| 1  | 5.619724000 | -0.628960000 | 1.413981000  |
| 1  | 6.324885000 | -1.423312000 | -0.827083000 |

**5Ge-S (T.E.= -3372.070081)**

|    |              |              |              |
|----|--------------|--------------|--------------|
| 6  | 0.571932000  | -0.347550000 | 1.582036000  |
| 6  | 1.243359000  | -0.074576000 | 0.229212000  |
| 1  | 0.738045000  | -1.381195000 | 1.916430000  |
| 1  | 0.958052000  | 0.263820000  | 2.405506000  |
| 7  | -1.444482000 | -0.180562000 | 0.281005000  |
| 14 | 2.472820000  | -1.446247000 | -0.167004000 |
| 14 | 1.923642000  | 1.687991000  | 0.184427000  |
| 6  | 1.489908000  | -3.022819000 | -0.455171000 |
| 1  | 0.937845000  | -2.976155000 | -1.399772000 |
| 1  | 2.154048000  | -3.889099000 | -0.512185000 |
| 1  | 0.768090000  | -3.214066000 | 0.343808000  |
| 6  | 3.648890000  | -1.739306000 | 1.260233000  |
| 1  | 4.225732000  | -2.649100000 | 1.072872000  |
| 1  | 4.355019000  | -0.916254000 | 1.382699000  |
| 1  | 3.122016000  | -1.873680000 | 2.207901000  |
| 6  | 3.458087000  | 1.844049000  | 1.244522000  |
| 1  | 4.306875000  | 1.314006000  | 0.806413000  |
| 1  | 3.735087000  | 2.897019000  | 1.342005000  |

|    |              |              |              |
|----|--------------|--------------|--------------|
| 1  | 3.294548000  | 1.446626000  | 2.249391000  |
| 6  | 2.316807000  | 2.253224000  | -1.559053000 |
| 1  | 2.692147000  | 3.279631000  | -1.518970000 |
| 1  | 3.075744000  | 1.641326000  | -2.048257000 |
| 1  | 1.429061000  | 2.258726000  | -2.198239000 |
| 6  | 3.460006000  | -1.099431000 | -1.718800000 |
| 1  | 4.183658000  | -0.293366000 | -1.577214000 |
| 1  | 4.017315000  | -1.997782000 | -1.997207000 |
| 1  | 2.816711000  | -0.834754000 | -2.562533000 |
| 6  | 0.619434000  | 2.861460000  | 0.848760000  |
| 1  | -0.276900000 | 2.870661000  | 0.220707000  |
| 1  | 0.307100000  | 2.626104000  | 1.868405000  |
| 1  | 1.023230000  | 3.877623000  | 0.855707000  |
| 6  | -2.845151000 | -0.115483000 | 0.080097000  |
| 6  | -3.690989000 | -1.077951000 | 0.618258000  |
| 6  | -3.378797000 | 0.904559000  | -0.696458000 |
| 6  | -5.050197000 | -1.017245000 | 0.375933000  |
| 1  | -3.274312000 | -1.874095000 | 1.223322000  |
| 6  | -4.740039000 | 0.956269000  | -0.944382000 |
| 1  | -2.716709000 | 1.667509000  | -1.094784000 |
| 6  | -5.580087000 | -0.003103000 | -0.407229000 |
| 1  | -5.702511000 | -1.771957000 | 0.799723000  |
| 1  | -5.144133000 | 1.756789000  | -1.552978000 |
| 1  | -6.646289000 | 0.039304000  | -0.595469000 |
| 6  | -0.931255000 | -0.190346000 | 1.569532000  |
| 8  | -1.595326000 | -0.105303000 | 2.574865000  |
| 32 | -0.206481000 | -0.135506000 | -1.144128000 |

**5Ge-T (T.E.= -3371.986298)**

|    |              |              |              |
|----|--------------|--------------|--------------|
| 6  | 0.630649000  | -0.601076000 | 1.496635000  |
| 6  | 1.358983000  | -0.077817000 | 0.267061000  |
| 1  | 0.809488000  | -1.673798000 | 1.655394000  |
| 1  | 1.022859000  | -0.094407000 | 2.390120000  |
| 7  | -1.455317000 | -0.445335000 | 0.308402000  |
| 14 | 2.896893000  | -1.114552000 | -0.122357000 |
| 14 | 1.415912000  | 1.824181000  | 0.137927000  |
| 6  | 2.424613000  | -2.899953000 | -0.416476000 |
| 1  | 1.945623000  | -3.024302000 | -1.390160000 |
| 1  | 3.326341000  | -3.518664000 | -0.396325000 |
| 1  | 1.738271000  | -3.284783000 | 0.341319000  |

|    |              |              |              |
|----|--------------|--------------|--------------|
| 6  | 4.007344000  | -1.034485000 | 1.384341000  |
| 1  | 4.870642000  | -1.686911000 | 1.230184000  |
| 1  | 4.376488000  | -0.025837000 | 1.576004000  |
| 1  | 3.484734000  | -1.381363000 | 2.278724000  |
| 6  | 2.803149000  | 2.365240000  | 1.283700000  |
| 1  | 3.783908000  | 2.085087000  | 0.893382000  |
| 1  | 2.778266000  | 3.454202000  | 1.377795000  |
| 1  | 2.696812000  | 1.939292000  | 2.284198000  |
| 6  | 1.782366000  | 2.436648000  | -1.587382000 |
| 1  | 1.874121000  | 3.526093000  | -1.551514000 |
| 1  | 2.710399000  | 2.038749000  | -2.000589000 |
| 1  | 0.966664000  | 2.192966000  | -2.272848000 |
| 6  | 3.792353000  | -0.477553000 | -1.631245000 |
| 1  | 4.244023000  | 0.503009000  | -1.466456000 |
| 1  | 4.593745000  | -1.172525000 | -1.894226000 |
| 1  | 3.121108000  | -0.404901000 | -2.491661000 |
| 6  | -0.176315000 | 2.599150000  | 0.728775000  |
| 1  | -1.007485000 | 2.396761000  | 0.049166000  |
| 1  | -0.465407000 | 2.268969000  | 1.729053000  |
| 1  | -0.033239000 | 3.682721000  | 0.766933000  |
| 6  | -2.834469000 | -0.284192000 | 0.087717000  |
| 6  | -3.795287000 | -0.832081000 | 0.934513000  |
| 6  | -3.251022000 | 0.413622000  | -1.043871000 |
| 6  | -5.138731000 | -0.670925000 | 0.649561000  |
| 1  | -3.482598000 | -1.378332000 | 1.813024000  |
| 6  | -4.596794000 | 0.564269000  | -1.324765000 |
| 1  | -2.501159000 | 0.855535000  | -1.697189000 |
| 6  | -5.548825000 | 0.024629000  | -0.476712000 |
| 1  | -5.876177000 | -1.101465000 | 1.317506000  |
| 1  | -4.900753000 | 1.113601000  | -2.208371000 |
| 1  | -6.604031000 | 0.142923000  | -0.692655000 |
| 6  | -0.885743000 | -0.416369000 | 1.541656000  |
| 8  | -1.458458000 | -0.268815000 | 2.603466000  |
| 32 | -0.169708000 | -0.586694000 | -1.131449000 |

**6Ge-S (T.E.= -3450.363067)**

|   |              |              |              |
|---|--------------|--------------|--------------|
| 6 | -0.876320000 | 1.210654000  | -0.251222000 |
| 6 | 0.530951000  | 1.225508000  | -0.226738000 |
| 6 | 1.207686000  | -0.079020000 | 0.037666000  |
| 7 | -1.445900000 | -0.035855000 | -0.020730000 |

|    |              |              |              |
|----|--------------|--------------|--------------|
| 14 | 2.110655000  | -0.669702000 | -1.517044000 |
| 14 | 2.202878000  | -0.037402000 | 1.642835000  |
| 6  | 2.470598000  | -1.761428000 | 2.334200000  |
| 1  | 2.935255000  | -2.440408000 | 1.616309000  |
| 1  | 3.132801000  | -1.693215000 | 3.202132000  |
| 1  | 1.536814000  | -2.220379000 | 2.670478000  |
| 6  | 1.209031000  | 0.943728000  | 2.891852000  |
| 1  | 0.180604000  | 0.573625000  | 2.952858000  |
| 1  | 1.655888000  | 0.862230000  | 3.885920000  |
| 1  | 1.163620000  | 2.002050000  | 2.625999000  |
| 6  | 3.892738000  | 0.753897000  | 1.469284000  |
| 1  | 4.368744000  | 0.786000000  | 2.453629000  |
| 1  | 4.546618000  | 0.183643000  | 0.805356000  |
| 1  | 3.837851000  | 1.778072000  | 1.094891000  |
| 6  | 2.955030000  | -2.315918000 | -1.218025000 |
| 1  | 3.332207000  | -2.700566000 | -2.169625000 |
| 1  | 3.808536000  | -2.223446000 | -0.542254000 |
| 1  | 2.275776000  | -3.065211000 | -0.802810000 |
| 6  | 0.840535000  | -0.880451000 | -2.883487000 |
| 1  | 0.181110000  | -1.736137000 | -2.708104000 |
| 1  | 0.216116000  | 0.012773000  | -2.975011000 |
| 1  | 1.337737000  | -1.040943000 | -3.843704000 |
| 6  | 3.395622000  | 0.536808000  | -2.147675000 |
| 1  | 4.163405000  | 0.771921000  | -1.408197000 |
| 1  | 3.890920000  | 0.084866000  | -3.012404000 |
| 1  | 2.939760000  | 1.471691000  | -2.479227000 |
| 6  | -1.593622000 | 2.374653000  | -0.520347000 |
| 6  | -0.919568000 | 3.561743000  | -0.735728000 |
| 6  | 0.465679000  | 3.600899000  | -0.687102000 |
| 6  | 1.177592000  | 2.439276000  | -0.440341000 |
| 1  | -2.675984000 | 2.344693000  | -0.561850000 |
| 1  | -1.482270000 | 4.464649000  | -0.943417000 |
| 1  | 0.992196000  | 4.534097000  | -0.848584000 |
| 1  | 2.261414000  | 2.472203000  | -0.411806000 |
| 32 | -0.252207000 | -1.442907000 | 0.292353000  |
| 6  | -2.846784000 | -0.213560000 | 0.034611000  |
| 6  | -3.604129000 | 0.386144000  | 1.036447000  |
| 6  | -3.470939000 | -1.042392000 | -0.888577000 |
| 6  | -4.965791000 | 0.160307000  | 1.106415000  |
| 1  | -3.105899000 | 1.022125000  | 1.761170000  |



|   |              |              |              |
|---|--------------|--------------|--------------|
| 6 | -4.834347000 | -1.274493000 | -0.808302000 |
| 1 | -2.872078000 | -1.496218000 | -1.672020000 |
| 6 | -5.585364000 | -0.672130000 | 0.185498000  |
| 1 | -5.547081000 | 0.627928000  | 1.892695000  |
| 1 | -5.310959000 | -1.926632000 | -1.530874000 |
| 1 | -6.652223000 | -0.851296000 | 0.246617000  |

**6Ge-T (T.E.= -3450.291848)**

|    |              |              |              |
|----|--------------|--------------|--------------|
| 6  | 0.823179000  | 1.338706000  | -0.256701000 |
| 6  | -0.598170000 | 1.266873000  | -0.091971000 |
| 6  | -1.222504000 | -0.060264000 | 0.026705000  |
| 7  | 1.440749000  | 0.147258000  | -0.415444000 |
| 14 | -1.159641000 | -0.674993000 | 1.815479000  |
| 14 | -2.881155000 | -0.252640000 | -0.863570000 |
| 6  | -3.139447000 | -2.048985000 | -1.343226000 |
| 1  | -3.102720000 | -2.735504000 | -0.495689000 |
| 1  | -4.126039000 | -2.142231000 | -1.806922000 |
| 1  | -2.401278000 | -2.377103000 | -2.080584000 |
| 6  | -2.849116000 | 0.734176000  | -2.457264000 |
| 1  | -1.891447000 | 0.590659000  | -2.967113000 |
| 1  | -3.641208000 | 0.375050000  | -3.119977000 |
| 1  | -2.997731000 | 1.805128000  | -2.310277000 |
| 6  | -4.380705000 | 0.260326000  | 0.143943000  |
| 1  | -5.271849000 | 0.160458000  | -0.482488000 |
| 1  | -4.521668000 | -0.378829000 | 1.018837000  |
| 1  | -4.332328000 | 1.295401000  | 0.488883000  |
| 6  | -1.946663000 | -2.364940000 | 1.979991000  |
| 1  | -1.822103000 | -2.707379000 | 3.011018000  |
| 1  | -3.016142000 | -2.362570000 | 1.758168000  |
| 1  | -1.457620000 | -3.090892000 | 1.324856000  |
| 6  | 0.586557000  | -0.781643000 | 2.480711000  |
| 1  | 1.202986000  | -1.491040000 | 1.922442000  |
| 1  | 1.081978000  | 0.192278000  | 2.473541000  |
| 1  | 0.539928000  | -1.118504000 | 3.520466000  |
| 6  | -2.063275000 | 0.545320000  | 2.920137000  |
| 1  | -3.113269000 | 0.668285000  | 2.648036000  |
| 1  | -2.021912000 | 0.205871000  | 3.958872000  |
| 1  | -1.584920000 | 1.527367000  | 2.872414000  |
| 6  | 1.464364000  | 2.594451000  | -0.335267000 |
| 6  | 0.732938000  | 3.746450000  | -0.246473000 |

|    |              |              |              |
|----|--------------|--------------|--------------|
| 6  | -0.656111000 | 3.689318000  | -0.080067000 |
| 6  | -1.301032000 | 2.474449000  | -0.027081000 |
| 1  | 2.531666000  | 2.635699000  | -0.510381000 |
| 1  | 1.227734000  | 4.707135000  | -0.325376000 |
| 1  | -1.226614000 | 4.606529000  | 0.006305000  |
| 1  | -2.375724000 | 2.446317000  | 0.115807000  |
| 32 | 0.117714000  | -1.283770000 | -1.036227000 |
| 6  | 2.793589000  | -0.087535000 | -0.285059000 |
| 6  | 3.376774000  | -1.105280000 | -1.050710000 |
| 6  | 3.588967000  | 0.578152000  | 0.659457000  |
| 6  | 4.709364000  | -1.429703000 | -0.891037000 |
| 1  | 2.773874000  | -1.607801000 | -1.799734000 |
| 6  | 4.916155000  | 0.239994000  | 0.814300000  |
| 1  | 3.142589000  | 1.325487000  | 1.303834000  |
| 6  | 5.487749000  | -0.759253000 | 0.038222000  |
| 1  | 5.144581000  | -2.211138000 | -1.502651000 |
| 1  | 5.510291000  | 0.751511000  | 1.562614000  |
| 1  | 6.532306000  | -1.017161000 | 0.164085000  |

**7Ge-S (T.E.= -2711.833155)**

|   |              |              |              |
|---|--------------|--------------|--------------|
| 6 | 0.335167000  | 1.139365000  | 0.000531000  |
| 6 | 1.775762000  | 0.684578000  | 0.000145000  |
| 6 | 2.022616000  | -0.688126000 | -0.000173000 |
| 7 | -0.486095000 | -0.087519000 | 0.000350000  |
| 6 | -1.898952000 | 0.021390000  | 0.000181000  |
| 6 | -2.609110000 | 0.044971000  | -1.197081000 |
| 6 | -2.609710000 | 0.043367000  | 1.197134000  |
| 6 | -3.991601000 | 0.110306000  | -1.196997000 |
| 1 | -2.058299000 | -0.002540000 | -2.130351000 |
| 6 | -3.992203000 | 0.108693000  | 1.196435000  |
| 1 | -2.059407000 | -0.005506000 | 2.130630000  |
| 6 | -4.688150000 | 0.148044000  | -0.000430000 |
| 1 | -4.527745000 | 0.122294000  | -2.139100000 |
| 1 | -4.528825000 | 0.119379000  | 2.138282000  |
| 1 | -5.770641000 | 0.195390000  | -0.000671000 |
| 6 | 2.839264000  | 1.578852000  | 0.000151000  |
| 6 | 3.336557000  | -1.149146000 | -0.000499000 |
| 6 | 4.139661000  | 1.106616000  | -0.000164000 |
| 6 | 4.394189000  | -0.258447000 | -0.000491000 |
| 1 | 2.661696000  | 2.650336000  | 0.000412000  |

|    |              |              |              |
|----|--------------|--------------|--------------|
| 1  | 4.965016000  | 1.809713000  | -0.000156000 |
| 1  | 5.416601000  | -0.619303000 | -0.000746000 |
| 1  | 3.536411000  | -2.217308000 | -0.000772000 |
| 6  | 0.051817000  | 1.970382000  | 1.249283000  |
| 1  | -0.993830000 | 2.284398000  | 1.276945000  |
| 1  | 0.269672000  | 1.391423000  | 2.149885000  |
| 1  | 0.671718000  | 2.868858000  | 1.260795000  |
| 6  | 0.051186000  | 1.970863000  | -1.247745000 |
| 1  | 0.670992000  | 2.869403000  | -1.259202000 |
| 1  | 0.268635000  | 1.392272000  | -2.148683000 |
| 1  | -0.994514000 | 2.284779000  | -1.274780000 |
| 32 | 0.341757000  | -1.735037000 | -0.000207000 |

**7Ge-T (T.E.= -2711.749302)**

|   |              |              |              |
|---|--------------|--------------|--------------|
| 6 | -0.317304000 | 1.224921000  | -0.000133000 |
| 6 | -1.751799000 | 0.707239000  | 0.000034000  |
| 6 | -1.982440000 | -0.671150000 | 0.000168000  |
| 7 | 0.585691000  | 0.053605000  | -0.000064000 |
| 6 | 1.913684000  | 0.126537000  | 0.000003000  |
| 6 | 2.645042000  | -1.107914000 | 0.000055000  |
| 6 | 2.701748000  | 1.324206000  | -0.000001000 |
| 6 | 4.014787000  | -1.135935000 | 0.000205000  |
| 1 | 2.082499000  | -2.033439000 | -0.000058000 |
| 6 | 4.066737000  | 1.272167000  | 0.000133000  |
| 1 | 2.227114000  | 2.291444000  | -0.000089000 |
| 6 | 4.743392000  | 0.047839000  | 0.000263000  |
| 1 | 4.528412000  | -2.089729000 | 0.000263000  |
| 1 | 4.631174000  | 2.196912000  | 0.000146000  |
| 1 | 5.826352000  | 0.025231000  | 0.000378000  |
| 6 | -2.821206000 | 1.591565000  | -0.000001000 |
| 6 | -3.307802000 | -1.124432000 | 0.000331000  |
| 6 | -4.126474000 | 1.124990000  | 0.000121000  |
| 6 | -4.369147000 | -0.242488000 | 0.000305000  |
| 1 | -2.652607000 | 2.664912000  | -0.000128000 |
| 1 | -4.951013000 | 1.828328000  | 0.000092000  |
| 1 | -5.388507000 | -0.613293000 | 0.000409000  |
| 1 | -3.505652000 | -2.193849000 | 0.000477000  |
| 6 | -0.116734000 | 2.037290000  | -1.282979000 |
| 1 | 0.874544000  | 2.477066000  | -1.372968000 |
| 1 | -0.285222000 | 1.391668000  | -2.147948000 |

|    |              |              |              |
|----|--------------|--------------|--------------|
| 1  | -0.846870000 | 2.845847000  | -1.322694000 |
| 6  | -0.116668000 | 2.037577000  | 1.282543000  |
| 1  | -0.847287000 | 2.845682000  | 1.322395000  |
| 1  | -0.284493000 | 1.391953000  | 2.147639000  |
| 1  | 0.874360000  | 2.477979000  | 1.372096000  |
| 32 | -0.419923000 | -1.848638000 | -0.000182000 |

**8Ge-S (T.E.= -2940.691306)**

|    |              |              |              |
|----|--------------|--------------|--------------|
| 6  | -0.537798000 | 1.692658000  | 0.054137000  |
| 6  | 0.914360000  | 1.632889000  | 0.492775000  |
| 6  | 1.479432000  | 0.300697000  | 0.048520000  |
| 1  | -1.092921000 | 2.419830000  | 0.659626000  |
| 1  | -0.593342000 | 2.039060000  | -0.992190000 |
| 1  | 0.965804000  | 1.734572000  | 1.587201000  |
| 1  | 1.452227000  | 2.497415000  | 0.080128000  |
| 32 | 0.154211000  | -1.031407000 | -0.136777000 |
| 7  | -1.113320000 | 0.366744000  | 0.186823000  |
| 15 | 3.143387000  | 0.048360000  | -0.025924000 |
| 6  | 4.004731000  | 1.070419000  | -1.246575000 |
| 1  | 3.780169000  | 2.120938000  | -1.052642000 |
| 1  | 5.085315000  | 0.922751000  | -1.196773000 |
| 1  | 3.642948000  | 0.817329000  | -2.243636000 |
| 6  | 3.561522000  | -1.649053000 | -0.442802000 |
| 1  | 3.166346000  | -2.327752000 | 0.313593000  |
| 1  | 3.132299000  | -1.908218000 | -1.411171000 |
| 1  | 4.646264000  | -1.755781000 | -0.491458000 |
| 6  | 4.035383000  | 0.416127000  | 1.506669000  |
| 1  | 5.110957000  | 0.274792000  | 1.383989000  |
| 1  | 3.844868000  | 1.454043000  | 1.787655000  |
| 1  | 3.666447000  | -0.231771000 | 2.302541000  |
| 6  | -2.481735000 | 0.218182000  | 0.091166000  |
| 6  | -3.075880000 | -1.023342000 | 0.375675000  |
| 6  | -3.339003000 | 1.266618000  | -0.272638000 |
| 6  | -4.438810000 | -1.204555000 | 0.286209000  |
| 1  | -2.441562000 | -1.848258000 | 0.684496000  |
| 6  | -4.709195000 | 1.074482000  | -0.348686000 |
| 1  | -2.932751000 | 2.241556000  | -0.510660000 |
| 6  | -5.276102000 | -0.156689000 | -0.075722000 |
| 1  | -4.858165000 | -2.178671000 | 0.514741000  |
| 1  | -5.340496000 | 1.909822000  | -0.633390000 |

1 -6.348134000 -0.299836000 -0.136451000

**8Ge-T (T.E.= -2940.613120)**

6 0.154242000 -0.706470000 1.717566000  
6 -1.277262000 -0.260090000 2.034808000  
6 -1.787051000 0.357554000 0.779412000  
1 0.750027000 -0.808037000 2.636784000  
1 0.104224000 -1.719314000 1.277507000  
1 -1.254545000 0.503574000 2.820801000  
1 -1.857035000 -1.111330000 2.413033000  
32 -0.378250000 1.774510000 0.220983000  
7 0.746783000 0.228585000 0.787471000  
15 -2.428865000 -0.608583000 -0.505926000  
6 -1.140570000 -1.337546000 -1.534902000  
1 -0.548893000 -2.039892000 -0.945447000  
1 -1.591533000 -1.857606000 -2.382214000  
1 -0.487498000 -0.534808000 -1.886745000  
6 -3.415121000 0.425519000 -1.587780000  
1 -4.244854000 0.858337000 -1.028531000  
1 -2.774999000 1.229554000 -1.958337000  
1 -3.799616000 -0.156647000 -2.426676000  
6 -3.471101000 -1.975947000 0.034593000  
1 -3.902171000 -2.490090000 -0.825935000  
1 -2.868262000 -2.684107000 0.605739000  
1 -4.273589000 -1.600040000 0.670133000  
6 1.977081000 -0.079055000 0.276605000  
6 2.574270000 0.755918000 -0.690781000  
6 2.704395000 -1.222293000 0.660636000  
6 3.808208000 0.465024000 -1.228211000  
1 2.038289000 1.641472000 -1.018071000  
6 3.946113000 -1.497969000 0.113157000  
1 2.302358000 -1.899108000 1.403762000  
6 4.514428000 -0.665842000 -0.835101000  
1 4.229835000 1.135037000 -1.970311000  
1 4.476452000 -2.386685000 0.439768000  
1 5.485523000 -0.888815000 -1.260144000

**9Ge-S (T.E.= -2939.518274)**

6 0.488292000 1.571363000 0.420337000  
6 -0.866050000 1.578366000 0.382279000

|    |              |              |              |
|----|--------------|--------------|--------------|
| 6  | -1.468027000 | 0.311750000  | 0.080789000  |
| 7  | 1.092432000  | 0.358236000  | 0.191006000  |
| 15 | -3.150920000 | 0.109671000  | -0.015733000 |
| 6  | -4.033581000 | 0.508156000  | 1.508801000  |
| 1  | -3.806877000 | 1.537499000  | 1.792504000  |
| 1  | -5.112003000 | 0.401890000  | 1.376580000  |
| 1  | -3.690927000 | -0.153602000 | 2.304742000  |
| 6  | -3.599207000 | -1.581484000 | -0.419751000 |
| 1  | -4.685655000 | -1.677151000 | -0.443763000 |
| 1  | -3.192521000 | -1.847906000 | -1.395765000 |
| 1  | -3.194501000 | -2.260993000 | 0.331095000  |
| 6  | -3.948047000 | 1.148534000  | -1.258822000 |
| 1  | -3.560870000 | 0.888927000  | -2.244509000 |
| 1  | -5.032174000 | 1.022533000  | -1.240710000 |
| 1  | -3.704309000 | 2.192728000  | -1.054930000 |
| 32 | -0.154434000 | -1.060543000 | -0.185540000 |
| 6  | 2.482250000  | 0.242491000  | 0.100206000  |
| 6  | 3.106536000  | -0.945217000 | 0.486074000  |
| 6  | 3.281584000  | 1.278483000  | -0.386762000 |
| 6  | 4.476023000  | -1.092893000 | 0.380075000  |
| 1  | 2.497197000  | -1.748509000 | 0.887166000  |
| 6  | 4.654258000  | 1.128888000  | -0.474957000 |
| 1  | 2.816697000  | 2.197918000  | -0.723342000 |
| 6  | 5.263337000  | -0.055709000 | -0.096207000 |
| 1  | 4.935183000  | -2.025858000 | 0.687840000  |
| 1  | 5.253020000  | 1.947888000  | -0.858354000 |
| 1  | 6.338188000  | -0.169836000 | -0.169619000 |
| 1  | 1.097777000  | 2.434349000  | 0.665514000  |
| 1  | -1.423775000 | 2.488400000  | 0.589438000  |

**9Ge-T (T.E.= -2939.449841)**

|    |              |              |              |
|----|--------------|--------------|--------------|
| 6  | 0.515215000  | 1.620147000  | 0.088673000  |
| 6  | -0.881727000 | 1.617977000  | 0.052578000  |
| 6  | -1.530814000 | 0.405408000  | -0.041498000 |
| 7  | 1.155936000  | 0.445893000  | 0.041192000  |
| 15 | -3.211559000 | 0.172122000  | 0.004125000  |
| 6  | -3.734248000 | -0.706201000 | 1.490168000  |
| 1  | -3.545656000 | -0.081510000 | 2.363601000  |
| 1  | -4.793514000 | -0.964509000 | 1.441565000  |
| 1  | -3.138344000 | -1.617036000 | 1.581334000  |

|    |              |              |              |
|----|--------------|--------------|--------------|
| 6  | -3.752685000 | -0.884679000 | -1.349762000 |
| 1  | -4.814306000 | -1.121130000 | -1.259701000 |
| 1  | -3.562821000 | -0.385847000 | -2.300535000 |
| 1  | -3.171628000 | -1.809132000 | -1.323406000 |
| 6  | -4.202740000 | 1.672408000  | -0.072632000 |
| 1  | -3.966178000 | 2.227334000  | -0.980986000 |
| 1  | -5.262676000 | 1.412923000  | -0.075355000 |
| 1  | -3.993422000 | 2.299554000  | 0.794669000  |
| 32 | -0.162599000 | -1.157857000 | -0.074578000 |
| 6  | 2.524853000  | 0.309879000  | 0.027279000  |
| 6  | 3.074443000  | -0.978228000 | 0.134573000  |
| 6  | 3.416721000  | 1.388693000  | -0.102822000 |
| 6  | 4.440725000  | -1.173929000 | 0.125586000  |
| 1  | 2.406583000  | -1.826620000 | 0.241977000  |
| 6  | 4.779636000  | 1.178143000  | -0.110360000 |
| 1  | 3.041830000  | 2.398395000  | -0.215946000 |
| 6  | 5.309966000  | -0.100766000 | 0.005433000  |
| 1  | 4.831714000  | -2.181584000 | 0.214961000  |
| 1  | 5.443261000  | 2.029726000  | -0.215688000 |
| 1  | 6.382074000  | -0.255345000 | -0.003941000 |
| 1  | 1.065892000  | 2.551883000  | 0.180615000  |
| 1  | -1.393869000 | 2.578124000  | 0.109802000  |

**10Ge-S (T.E.= -3093.060391)**

|    |              |              |              |
|----|--------------|--------------|--------------|
| 6  | -0.514637000 | 1.181644000  | -0.113243000 |
| 6  | 0.903969000  | 1.132668000  | -0.062484000 |
| 6  | 1.440471000  | -0.203944000 | 0.010918000  |
| 7  | -1.124091000 | -0.056946000 | -0.087094000 |
| 6  | -1.168704000 | 2.406706000  | -0.236249000 |
| 6  | -0.444411000 | 3.582983000  | -0.280754000 |
| 6  | 0.942619000  | 3.554926000  | -0.208068000 |
| 6  | 1.602086000  | 2.344815000  | -0.105572000 |
| 1  | -2.249949000 | 2.433132000  | -0.305739000 |
| 1  | -0.965110000 | 4.528968000  | -0.376986000 |
| 1  | 1.509638000  | 4.478298000  | -0.239673000 |
| 1  | 2.687917000  | 2.346492000  | -0.064688000 |
| 15 | 3.097469000  | -0.572126000 | 0.082261000  |
| 6  | 4.071443000  | -0.034276000 | -1.342030000 |
| 1  | 3.994700000  | 1.046206000  | -1.464144000 |
| 1  | 5.120057000  | -0.310368000 | -1.214997000 |

|    |              |              |              |
|----|--------------|--------------|--------------|
| 1  | 3.672889000  | -0.511740000 | -2.238039000 |
| 6  | 3.365280000  | -2.347830000 | 0.168623000  |
| 1  | 4.437099000  | -2.543280000 | 0.230233000  |
| 1  | 2.872763000  | -2.760730000 | 1.049456000  |
| 1  | 2.964880000  | -2.831349000 | -0.723010000 |
| 6  | 3.968524000  | 0.099532000  | 1.515925000  |
| 1  | 3.519758000  | -0.310882000 | 2.421243000  |
| 1  | 5.028019000  | -0.160779000 | 1.480977000  |
| 1  | 3.864775000  | 1.184292000  | 1.541913000  |
| 32 | 0.069793000  | -1.541079000 | 0.014210000  |
| 6  | -2.519267000 | -0.217485000 | -0.019874000 |
| 6  | -3.160160000 | -1.045448000 | -0.937164000 |
| 6  | -3.278963000 | 0.380577000  | 0.985242000  |
| 6  | -4.523179000 | -1.273546000 | -0.851188000 |
| 1  | -2.570807000 | -1.503502000 | -1.724477000 |
| 6  | -4.641618000 | 0.161500000  | 1.058712000  |
| 1  | -2.783594000 | 1.008761000  | 1.717450000  |
| 6  | -5.271905000 | -0.667477000 | 0.142392000  |
| 1  | -5.003233000 | -1.923614000 | -1.573890000 |
| 1  | -5.216014000 | 0.632815000  | 1.848387000  |
| 1  | -6.339842000 | -0.839752000 | 0.205900000  |

**10Ge-T (T.E.= -3092.976697)**

|    |              |              |              |
|----|--------------|--------------|--------------|
| 6  | -0.521178000 | 1.171655000  | -0.160814000 |
| 6  | 0.924193000  | 1.110936000  | -0.024362000 |
| 6  | 1.458051000  | -0.165168000 | 0.160752000  |
| 7  | -1.163542000 | -0.010653000 | -0.082730000 |
| 6  | -1.130985000 | 2.415103000  | -0.408769000 |
| 6  | -0.385290000 | 3.566829000  | -0.469020000 |
| 6  | 1.008557000  | 3.532200000  | -0.301708000 |
| 6  | 1.640269000  | 2.336711000  | -0.101217000 |
| 1  | -2.201335000 | 2.455126000  | -0.566545000 |
| 1  | -0.878239000 | 4.512452000  | -0.664450000 |
| 1  | 1.582250000  | 4.449995000  | -0.353600000 |
| 1  | 2.721022000  | 2.323530000  | -0.002477000 |
| 15 | 3.122772000  | -0.542449000 | 0.244579000  |
| 6  | 4.057553000  | -0.210524000 | -1.265742000 |
| 1  | 4.042863000  | 0.855466000  | -1.492639000 |
| 1  | 5.090604000  | -0.548261000 | -1.163017000 |
| 1  | 3.576718000  | -0.746792000 | -2.086070000 |



|    |              |              |              |
|----|--------------|--------------|--------------|
| 6  | 3.301750000  | -2.306205000 | 0.522404000  |
| 1  | 4.355268000  | -2.564472000 | 0.639222000  |
| 1  | 2.749320000  | -2.592251000 | 1.418656000  |
| 1  | 2.891321000  | -2.851267000 | -0.330421000 |
| 6  | 4.034084000  | 0.253102000  | 1.583314000  |
| 1  | 3.563041000  | -0.001928000 | 2.533015000  |
| 1  | 5.067750000  | -0.098677000 | 1.583142000  |
| 1  | 4.024580000  | 1.336109000  | 1.468259000  |
| 32 | 0.042744000  | -1.625276000 | -0.322079000 |
| 6  | -2.537987000 | -0.158839000 | 0.045986000  |
| 6  | -3.176529000 | -1.205550000 | -0.625391000 |
| 6  | -3.305185000 | 0.641241000  | 0.900029000  |
| 6  | -4.532377000 | -1.427250000 | -0.466825000 |
| 1  | -2.593327000 | -1.828782000 | -1.296360000 |
| 6  | -4.658394000 | 0.412299000  | 1.052566000  |
| 1  | -2.820703000 | 1.427571000  | 1.467280000  |
| 6  | -5.285499000 | -0.618843000 | 0.367312000  |
| 1  | -5.004738000 | -2.240475000 | -1.006598000 |
| 1  | -5.229545000 | 1.040162000  | 1.727661000  |
| 1  | -6.347630000 | -0.793556000 | 0.490805000  |

**11Ge-S (T.E.= -3093.303644)**

|   |              |              |              |
|---|--------------|--------------|--------------|
| 6 | 0.487580000  | 1.395369000  | 0.000345000  |
| 6 | -1.043463000 | 1.255520000  | 0.000233000  |
| 6 | -1.514357000 | -0.088825000 | 0.000069000  |
| 7 | 1.060704000  | 0.046754000  | 0.000303000  |
| 6 | 2.462776000  | -0.117727000 | 0.000105000  |
| 6 | 3.168693000  | -0.225324000 | -1.196430000 |
| 6 | 4.539532000  | -0.417990000 | -1.196954000 |
| 6 | 5.231362000  | -0.510422000 | -0.000447000 |
| 6 | 4.539903000  | -0.418765000 | 1.196335000  |
| 6 | 3.169064000  | -0.226105000 | 1.196361000  |
| 1 | 5.069175000  | -0.503695000 | -2.139165000 |
| 1 | 6.304188000  | -0.663854000 | -0.000661000 |
| 1 | 5.069833000  | -0.505110000 | 2.138326000  |
| 6 | 0.885985000  | 2.171047000  | -1.247886000 |
| 1 | 1.966216000  | 2.334009000  | -1.274658000 |
| 1 | 0.595106000  | 1.623683000  | -2.148868000 |
| 1 | 0.385303000  | 3.140630000  | -1.252097000 |
| 6 | 0.885771000  | 2.171154000  | 1.248593000  |

|    |              |              |              |
|----|--------------|--------------|--------------|
| 1  | 0.385082000  | 3.140735000  | 1.252637000  |
| 1  | 0.594734000  | 1.623879000  | 2.149577000  |
| 1  | 1.965990000  | 2.334144000  | 1.275542000  |
| 15 | -3.209352000 | -0.301160000 | -0.000139000 |
| 6  | -4.041776000 | 0.405252000  | -1.431803000 |
| 1  | -5.119975000 | 0.247944000  | -1.365058000 |
| 1  | -3.824027000 | 1.472737000  | -1.463555000 |
| 1  | -3.658203000 | -0.065853000 | -2.337335000 |
| 6  | -3.618856000 | -2.050376000 | -0.000393000 |
| 1  | -3.199700000 | -2.527534000 | 0.886536000  |
| 1  | -4.702294000 | -2.178641000 | -0.000540000 |
| 1  | -3.199487000 | -2.527314000 | -0.887340000 |
| 6  | -4.042085000 | 0.404921000  | 1.431508000  |
| 1  | -3.824406000 | 1.472413000  | 1.463510000  |
| 1  | -5.120261000 | 0.247559000  | 1.364529000  |
| 1  | -3.658654000 | -0.066338000 | 2.337020000  |
| 1  | 2.618950000  | -0.163743000 | -2.129735000 |
| 1  | 2.619617000  | -0.165222000 | 2.129879000  |
| 8  | -1.745545000 | 2.270121000  | 0.000110000  |
| 32 | -0.101508000 | -1.397739000 | 0.000085000  |

**11Ge-T (T.E.= -3093.213532)**

|   |              |              |              |
|---|--------------|--------------|--------------|
| 6 | 0.505171000  | 1.473022000  | 0.000074000  |
| 6 | -1.030415000 | 1.265556000  | 0.000670000  |
| 6 | -1.475766000 | -0.064088000 | 0.000291000  |
| 7 | 1.153048000  | 0.154602000  | 0.000087000  |
| 6 | 2.475606000  | -0.029698000 | 0.000030000  |
| 6 | 2.959434000  | -1.376943000 | 0.000084000  |
| 6 | 4.302249000  | -1.658030000 | 0.000031000  |
| 6 | 5.237318000  | -0.630171000 | -0.000068000 |
| 6 | 4.801024000  | 0.697142000  | -0.000097000 |
| 6 | 3.465923000  | 0.999296000  | -0.000043000 |
| 1 | 4.631030000  | -2.690340000 | 0.000074000  |
| 1 | 6.297329000  | -0.854297000 | -0.000106000 |
| 1 | 5.526493000  | 1.501825000  | -0.000160000 |
| 6 | 0.820927000  | 2.250597000  | -1.276633000 |
| 1 | 1.855203000  | 2.585017000  | -1.340049000 |
| 1 | 0.607757000  | 1.627569000  | -2.149315000 |
| 1 | 0.170339000  | 3.124406000  | -1.310055000 |
| 6 | 0.821931000  | 2.251035000  | 1.276247000  |

|    |              |              |              |
|----|--------------|--------------|--------------|
| 1  | 0.171461000  | 3.124921000  | 1.309823000  |
| 1  | 0.609350000  | 1.628356000  | 2.149321000  |
| 1  | 1.856294000  | 2.585363000  | 1.338752000  |
| 15 | -3.176053000 | -0.253587000 | -0.000059000 |
| 6  | -4.009753000 | 0.448033000  | -1.434681000 |
| 1  | -5.087044000 | 0.282409000  | -1.370291000 |
| 1  | -3.798470000 | 1.516370000  | -1.468230000 |
| 1  | -3.620010000 | -0.024369000 | -2.337083000 |
| 6  | -3.593714000 | -2.001904000 | -0.000615000 |
| 1  | -3.174531000 | -2.479053000 | 0.886999000  |
| 1  | -4.677198000 | -2.130240000 | -0.000857000 |
| 1  | -3.174191000 | -2.478567000 | -0.888329000 |
| 6  | -4.010288000 | 0.447231000  | 1.434644000  |
| 1  | -3.799048000 | 1.515555000  | 1.468843000  |
| 1  | -5.087550000 | 0.281602000  | 1.369777000  |
| 1  | -3.620855000 | -0.025645000 | 2.336931000  |
| 1  | 2.235851000  | -2.182831000 | 0.000193000  |
| 1  | 3.171829000  | 2.035819000  | -0.000052000 |
| 8  | -1.742651000 | 2.284467000  | -0.000173000 |
| 32 | -0.162540000 | -1.528890000 | 0.000184000  |

**12Ge-S (T.E.= -3093.303455)**

|    |              |              |              |
|----|--------------|--------------|--------------|
| 6  | -0.644019000 | 1.415193000  | 0.133007000  |
| 6  | 0.889834000  | 1.409082000  | 0.254054000  |
| 6  | 1.401221000  | -0.005636000 | 0.077197000  |
| 7  | -1.192829000 | 0.164179000  | 0.070551000  |
| 6  | -2.590165000 | -0.017915000 | 0.003235000  |
| 6  | -3.185279000 | -0.989618000 | 0.801348000  |
| 6  | -4.545641000 | -1.232156000 | 0.722943000  |
| 6  | -5.334210000 | -0.499517000 | -0.147547000 |
| 6  | -4.747051000 | 0.472844000  | -0.941820000 |
| 6  | -3.387074000 | 0.713057000  | -0.874103000 |
| 1  | -4.990913000 | -1.993837000 | 1.352866000  |
| 1  | -6.400512000 | -0.683702000 | -0.206753000 |
| 1  | -5.355381000 | 1.050802000  | -1.628546000 |
| 15 | 3.026911000  | -0.435414000 | -0.129205000 |
| 6  | 4.205607000  | 0.255028000  | 1.058659000  |
| 1  | 5.199964000  | -0.158393000 | 0.877323000  |
| 1  | 4.253391000  | 1.339606000  | 0.950704000  |
| 1  | 3.888390000  | 0.014885000  | 2.073916000  |

|    |              |              |              |
|----|--------------|--------------|--------------|
| 6  | 3.247307000  | -2.218742000 | -0.003447000 |
| 1  | 2.666340000  | -2.731888000 | -0.770582000 |
| 1  | 4.303130000  | -2.453410000 | -0.147598000 |
| 1  | 2.929648000  | -2.569535000 | 0.978370000  |
| 6  | 3.787418000  | -0.027815000 | -1.724858000 |
| 1  | 3.814348000  | 1.052342000  | -1.867841000 |
| 1  | 4.806231000  | -0.418705000 | -1.769559000 |
| 1  | 3.190858000  | -0.470288000 | -2.523804000 |
| 1  | -2.567065000 | -1.550513000 | 1.495146000  |
| 1  | -2.931936000 | 1.469645000  | -1.499520000 |
| 8  | -1.269135000 | 2.457755000  | 0.149026000  |
| 6  | 1.437973000  | 2.391160000  | -0.776853000 |
| 1  | 0.954908000  | 3.363764000  | -0.665960000 |
| 1  | 2.515123000  | 2.531991000  | -0.642353000 |
| 1  | 1.262135000  | 2.031254000  | -1.794130000 |
| 6  | 1.179827000  | 1.943486000  | 1.662053000  |
| 1  | 0.786781000  | 1.260237000  | 2.418963000  |
| 1  | 2.254267000  | 2.049596000  | 1.825940000  |
| 1  | 0.714978000  | 2.922701000  | 1.798863000  |
| 32 | 0.047189000  | -1.312105000 | -0.045833000 |

**12Ge-T (T.E.= -3093.225654)**

|    |              |              |              |
|----|--------------|--------------|--------------|
| 6  | 0.340760000  | 1.423962000  | -0.250223000 |
| 6  | -1.110215000 | 1.609435000  | 0.296952000  |
| 6  | -1.611532000 | 0.225214000  | 0.542954000  |
| 7  | 0.932247000  | 0.287747000  | 0.187547000  |
| 6  | 2.275147000  | 0.002552000  | -0.125272000 |
| 6  | 2.625995000  | -1.309578000 | -0.433949000 |
| 6  | 3.940004000  | -1.645905000 | -0.707369000 |
| 6  | 4.928525000  | -0.677139000 | -0.678513000 |
| 6  | 4.586944000  | 0.629898000  | -0.367031000 |
| 6  | 3.276326000  | 0.972145000  | -0.090511000 |
| 1  | 4.190382000  | -2.673101000 | -0.947934000 |
| 1  | 5.958179000  | -0.937745000 | -0.893694000 |
| 1  | 5.353404000  | 1.396255000  | -0.334077000 |
| 15 | -2.591679000 | -0.696388000 | -0.551876000 |
| 6  | -4.109512000 | 0.048773000  | -1.186775000 |
| 1  | -4.688839000 | -0.721070000 | -1.700061000 |
| 1  | -4.697400000 | 0.440922000  | -0.356004000 |
| 1  | -3.892475000 | 0.856041000  | -1.883159000 |

|    |              |              |              |
|----|--------------|--------------|--------------|
| 6  | -1.627632000 | -1.218515000 | -1.982571000 |
| 1  | -0.739535000 | -1.739435000 | -1.615287000 |
| 1  | -2.213693000 | -1.883610000 | -2.619211000 |
| 1  | -1.315262000 | -0.342070000 | -2.552594000 |
| 6  | -3.141056000 | -2.191681000 | 0.274886000  |
| 1  | -3.720633000 | -1.927220000 | 1.160243000  |
| 1  | -3.760985000 | -2.779147000 | -0.404671000 |
| 1  | -2.267501000 | -2.772245000 | 0.577619000  |
| 1  | 1.845336000  | -2.064572000 | -0.456378000 |
| 1  | 3.016084000  | 1.993834000  | 0.152153000  |
| 8  | 0.822688000  | 2.263305000  | -0.989257000 |
| 6  | -0.983872000 | 2.385665000  | 1.615456000  |
| 1  | -0.474743000 | 3.335279000  | 1.433991000  |
| 1  | -1.976732000 | 2.597330000  | 2.019973000  |
| 1  | -0.423277000 | 1.820103000  | 2.363098000  |
| 6  | -1.907200000 | 2.455841000  | -0.682987000 |
| 1  | -1.937418000 | 2.011223000  | -1.681358000 |
| 1  | -2.929527000 | 2.593457000  | -0.321494000 |
| 1  | -1.447043000 | 3.438137000  | -0.792075000 |
| 32 | -0.093952000 | -0.893163000 | 1.449375000  |

**<sup>13</sup>Ge-S (T.E.= -3134.833994)**

|    |              |              |              |
|----|--------------|--------------|--------------|
| 6  | 0.712141000  | 1.367966000  | 0.133378000  |
| 6  | -1.353908000 | -0.236248000 | -0.063035000 |
| 7  | 1.335732000  | 0.145406000  | -0.063442000 |
| 6  | 2.735264000  | -0.005907000 | -0.022144000 |
| 6  | 3.356266000  | -0.795090000 | -0.987466000 |
| 6  | 4.722224000  | -1.012797000 | -0.954354000 |
| 6  | 5.495296000  | -0.434962000 | 0.037997000  |
| 6  | 4.885097000  | 0.356772000  | 0.998548000  |
| 6  | 3.518828000  | 0.569884000  | 0.976309000  |
| 1  | 5.184393000  | -1.631899000 | -1.714996000 |
| 1  | 6.566343000  | -0.598334000 | 0.063220000  |
| 1  | 5.480674000  | 0.812885000  | 1.781557000  |
| 15 | -2.843455000 | -0.990333000 | 0.207300000  |
| 6  | -3.928055000 | -1.260823000 | -1.222922000 |
| 1  | -4.835307000 | -1.787532000 | -0.919648000 |
| 1  | -4.204637000 | -0.323694000 | -1.703927000 |
| 1  | -3.383979000 | -1.870019000 | -1.947126000 |
| 6  | -2.665247000 | -2.672314000 | 0.842929000  |

|    |              |              |              |
|----|--------------|--------------|--------------|
| 1  | -2.123725000 | -2.658887000 | 1.789430000  |
| 1  | -3.653819000 | -3.107972000 | 0.998538000  |
| 1  | -2.115371000 | -3.291700000 | 0.132569000  |
| 6  | -3.880985000 | -0.182787000 | 1.445960000  |
| 1  | -4.136859000 | 0.829659000  | 1.136758000  |
| 1  | -4.798063000 | -0.754586000 | 1.600597000  |
| 1  | -3.324087000 | -0.130235000 | 2.382445000  |
| 1  | 2.751403000  | -1.231226000 | -1.776224000 |
| 1  | 3.046621000  | 1.185620000  | 1.729600000  |
| 8  | 1.340989000  | 2.384749000  | 0.384418000  |
| 5  | -0.901540000 | 1.227569000  | -0.069614000 |
| 7  | -1.674739000 | 2.388821000  | -0.297977000 |
| 6  | -1.201296000 | 3.753952000  | -0.167708000 |
| 1  | -0.180042000 | 3.772444000  | 0.199000000  |
| 1  | -1.245760000 | 4.268486000  | -1.135382000 |
| 1  | -1.846820000 | 4.308631000  | 0.524302000  |
| 6  | -3.038930000 | 2.378466000  | -0.755593000 |
| 1  | -3.353470000 | 1.375582000  | -1.031067000 |
| 1  | -3.729536000 | 2.774960000  | 0.001595000  |
| 1  | -3.144736000 | 3.011845000  | -1.644435000 |
| 32 | 0.178477000  | -1.375348000 | -0.167033000 |

**<sup>13</sup>Ge-T (T.E.= -3134.758936)**

|    |              |              |              |
|----|--------------|--------------|--------------|
| 6  | 0.078873000  | 1.383094000  | -0.404271000 |
| 6  | -1.551754000 | -0.368341000 | 0.410927000  |
| 7  | 0.929687000  | 0.530443000  | 0.254644000  |
| 6  | 2.288973000  | 0.396640000  | -0.035052000 |
| 6  | 3.144969000  | -0.074796000 | 0.964976000  |
| 6  | 4.483833000  | -0.304724000 | 0.709727000  |
| 6  | 5.007962000  | -0.066971000 | -0.549927000 |
| 6  | 4.170026000  | 0.404322000  | -1.548578000 |
| 6  | 2.829534000  | 0.637589000  | -1.303577000 |
| 1  | 5.123052000  | -0.668195000 | 1.506593000  |
| 1  | 6.058373000  | -0.242610000 | -0.750305000 |
| 1  | 4.565836000  | 0.596124000  | -2.539996000 |
| 15 | -1.741111000 | -1.681508000 | -0.667505000 |
| 6  | -3.036176000 | -1.417049000 | -1.888777000 |
| 1  | -3.120492000 | -2.273618000 | -2.559671000 |
| 1  | -3.989165000 | -1.259109000 | -1.381865000 |
| 1  | -2.794523000 | -0.523514000 | -2.467669000 |

|    |              |              |              |
|----|--------------|--------------|--------------|
| 6  | -0.227721000 | -2.020349000 | -1.582304000 |
| 1  | 0.577035000  | -2.196753000 | -0.863428000 |
| 1  | -0.362481000 | -2.900480000 | -2.213496000 |
| 1  | 0.029543000  | -1.157542000 | -2.198919000 |
| 6  | -2.143479000 | -3.191815000 | 0.212654000  |
| 1  | -3.078123000 | -3.061268000 | 0.759158000  |
| 1  | -2.239952000 | -4.024035000 | -0.486179000 |
| 1  | -1.339220000 | -3.395691000 | 0.923349000  |
| 1  | 2.748119000  | -0.251395000 | 1.959681000  |
| 1  | 2.189305000  | 1.016283000  | -2.086864000 |
| 8  | 0.398733000  | 2.175800000  | -1.283219000 |
| 5  | -1.443317000 | 1.110404000  | 0.055123000  |
| 7  | -2.446276000 | 2.078016000  | 0.107087000  |
| 6  | -2.231143000 | 3.487969000  | -0.132706000 |
| 1  | -1.212773000 | 3.661083000  | -0.473521000 |
| 1  | -2.921354000 | 3.853238000  | -0.901638000 |
| 1  | -2.414829000 | 4.068636000  | 0.778638000  |
| 6  | -3.804000000 | 1.771820000  | 0.486898000  |
| 1  | -4.504788000 | 2.043783000  | -0.311781000 |
| 1  | -3.905483000 | 0.706289000  | 0.699091000  |
| 1  | -4.096699000 | 2.329260000  | 1.384274000  |
| 32 | 0.043398000  | -0.504370000 | 1.770475000  |

**14Ge-S (T.E.= -3134.851339)**

|   |              |              |              |
|---|--------------|--------------|--------------|
| 6 | 1.149472000  | 1.184147000  | 0.104867000  |
| 6 | 1.644758000  | -0.165194000 | -0.001051000 |
| 7 | -1.023500000 | -0.100298000 | -0.112122000 |
| 6 | -2.365697000 | -0.469232000 | 0.041946000  |
| 6 | -3.118790000 | 0.004205000  | 1.117838000  |
| 6 | -4.440484000 | -0.367633000 | 1.275757000  |
| 6 | -5.039553000 | -1.236913000 | 0.376053000  |
| 6 | -4.296893000 | -1.728403000 | -0.684147000 |
| 6 | -2.976127000 | -1.348584000 | -0.852032000 |
| 1 | -2.645434000 | 0.676171000  | 1.826530000  |
| 1 | -5.007243000 | 0.018220000  | 2.115904000  |
| 1 | -6.074888000 | -1.530074000 | 0.503050000  |
| 1 | -4.750835000 | -2.409280000 | -1.395643000 |
| 1 | -2.401943000 | -1.716431000 | -1.696575000 |
| 5 | -0.465568000 | 1.227790000  | -0.079840000 |
| 7 | -1.176981000 | 2.424591000  | -0.301724000 |

|    |              |              |              |
|----|--------------|--------------|--------------|
| 6  | -0.620287000 | 3.739330000  | -0.061346000 |
| 1  | -0.618020000 | 4.333667000  | -0.983536000 |
| 1  | -1.232132000 | 4.280958000  | 0.671290000  |
| 1  | 0.399553000  | 3.658660000  | 0.306281000  |
| 6  | -2.532183000 | 2.509495000  | -0.794982000 |
| 1  | -3.234621000 | 2.820418000  | -0.010385000 |
| 1  | -2.582900000 | 3.256219000  | -1.595275000 |
| 1  | -2.877053000 | 1.559947000  | -1.198322000 |
| 15 | 3.338741000  | -0.386518000 | 0.082762000  |
| 6  | 4.089881000  | 0.174811000  | 1.620395000  |
| 1  | 5.170887000  | 0.023780000  | 1.597117000  |
| 1  | 3.864339000  | 1.233880000  | 1.742648000  |
| 1  | 3.660334000  | -0.381378000 | 2.454149000  |
| 6  | 4.252926000  | 0.447254000  | -1.226091000 |
| 1  | 5.325041000  | 0.273101000  | -1.116416000 |
| 1  | 3.917654000  | 0.069597000  | -2.192631000 |
| 1  | 4.043309000  | 1.514882000  | -1.167119000 |
| 6  | 3.759848000  | -2.128783000 | -0.061336000 |
| 1  | 3.304933000  | -2.690178000 | 0.755914000  |
| 1  | 3.389565000  | -2.523359000 | -1.008559000 |
| 1  | 4.843235000  | -2.251917000 | -0.019856000 |
| 8  | 1.896510000  | 2.159920000  | 0.278458000  |
| 32 | 0.279469000  | -1.493577000 | -0.153024000 |

**<sup>14</sup>Ge-T (T.E.= -3134.764111)**

|   |              |              |              |
|---|--------------|--------------|--------------|
| 6 | 1.009754000  | 1.148624000  | 0.372503000  |
| 6 | 1.543594000  | -0.092109000 | -0.064884000 |
| 7 | -1.070924000 | -0.050546000 | -0.315480000 |
| 6 | -2.293190000 | -0.456172000 | 0.110265000  |
| 6 | -3.076350000 | 0.325926000  | 0.988355000  |
| 6 | -4.300011000 | -0.119642000 | 1.430100000  |
| 6 | -4.796763000 | -1.350088000 | 1.011490000  |
| 6 | -4.044980000 | -2.133875000 | 0.146367000  |
| 6 | -2.813331000 | -1.705147000 | -0.295617000 |
| 1 | -2.682528000 | 1.276361000  | 1.331214000  |
| 1 | -4.876747000 | 0.492238000  | 2.114007000  |
| 1 | -5.764166000 | -1.693808000 | 1.357785000  |
| 1 | -4.430236000 | -3.089202000 | -0.190898000 |
| 1 | -2.237063000 | -2.306190000 | -0.990030000 |
| 5 | -0.494419000 | 1.272966000  | -0.158256000 |



|    |              |              |              |
|----|--------------|--------------|--------------|
| 7  | -1.107642000 | 2.471234000  | -0.542115000 |
| 6  | -0.514938000 | 3.771435000  | -0.309007000 |
| 1  | -0.327193000 | 4.283426000  | -1.259901000 |
| 1  | -1.197797000 | 4.400918000  | 0.273539000  |
| 1  | 0.419924000  | 3.664633000  | 0.238262000  |
| 6  | -2.345860000 | 2.553475000  | -1.281650000 |
| 1  | -3.127175000 | 3.050366000  | -0.693320000 |
| 1  | -2.198173000 | 3.140093000  | -2.194813000 |
| 1  | -2.704203000 | 1.565468000  | -1.564655000 |
| 15 | 3.196054000  | -0.392601000 | 0.342682000  |
| 6  | 3.508175000  | -0.393159000 | 2.115157000  |
| 1  | 4.562110000  | -0.590999000 | 2.319381000  |
| 1  | 3.224495000  | 0.580513000  | 2.513786000  |
| 1  | 2.893270000  | -1.164650000 | 2.580173000  |
| 6  | 4.360826000  | 0.775807000  | -0.376600000 |
| 1  | 5.382471000  | 0.507875000  | -0.099629000 |
| 1  | 4.260108000  | 0.757503000  | -1.462171000 |
| 1  | 4.123505000  | 1.774249000  | -0.010775000 |
| 6  | 3.691474000  | -2.013023000 | -0.253854000 |
| 1  | 3.047168000  | -2.776849000 | 0.184868000  |
| 1  | 3.591901000  | -2.050501000 | -1.339836000 |
| 1  | 4.728965000  | -2.209223000 | 0.021279000  |
| 8  | 1.655955000  | 2.015339000  | 1.000608000  |
| 32 | 0.321080000  | -1.407121000 | -0.969834000 |

Cartesian coordinates of **IIa**, **IX**, diammino silylene/germylene (**I**), H<sub>2</sub>, NH<sub>3</sub>, CH<sub>3</sub>Ph and SiEt<sub>3</sub>H in their optimized state, along with their total energies (in hartrees) including zero point vibrational correction.

**IIa-S** (T.E.= -1055.849000)

|    |              |              |              |
|----|--------------|--------------|--------------|
| 6  | 0.013883000  | 2.338432000  | -0.080898000 |
| 6  | 1.203747000  | 1.714547000  | -0.077208000 |
| 1  | 0.024670000  | 3.420818000  | -0.122223000 |
| 14 | -0.028244000 | -0.812426000 | -0.009541000 |
| 6  | -2.410002000 | 2.500163000  | -0.046537000 |
| 6  | -1.302133000 | 1.737995000  | -0.045929000 |
| 1  | -3.408301000 | 2.087144000  | -0.025365000 |
| 1  | -2.310167000 | 3.576872000  | -0.069573000 |
| 6  | 2.605351000  | -0.286060000 | -0.001832000 |
| 6  | 3.305054000  | -0.376908000 | 1.194319000  |

|   |              |              |              |
|---|--------------|--------------|--------------|
| 6 | 3.146321000  | -0.835725000 | -1.155081000 |
| 6 | 4.542360000  | -0.994738000 | 1.230419000  |
| 1 | 2.863738000  | 0.039546000  | 2.094055000  |
| 6 | 4.382166000  | -1.460109000 | -1.115576000 |
| 1 | 2.585518000  | -0.766659000 | -2.081321000 |
| 6 | 5.083818000  | -1.536825000 | 0.075292000  |
| 1 | 5.082123000  | -1.062394000 | 2.167782000  |
| 1 | 4.796407000  | -1.889296000 | -2.020384000 |
| 1 | 6.050423000  | -2.025447000 | 0.106269000  |
| 7 | 1.310687000  | 0.319580000  | -0.039776000 |
| 6 | -2.637170000 | -0.274076000 | 0.013969000  |
| 6 | -3.278568000 | -0.605764000 | -1.169664000 |
| 6 | -3.251636000 | -0.532992000 | 1.230077000  |
| 6 | -4.530504000 | -1.196537000 | -1.136348000 |
| 1 | -2.784630000 | -0.391384000 | -2.111699000 |
| 6 | -4.503634000 | -1.123245000 | 1.261130000  |
| 1 | -2.736284000 | -0.261733000 | 2.145593000  |
| 6 | -5.145240000 | -1.453184000 | 0.078377000  |
| 1 | -5.026409000 | -1.459868000 | -2.063319000 |
| 1 | -4.978451000 | -1.328680000 | 2.213451000  |
| 1 | -6.124758000 | -1.916020000 | 0.103571000  |
| 7 | -1.340688000 | 0.329494000  | -0.018378000 |
| 6 | 2.469446000  | 2.500858000  | -0.140940000 |
| 1 | 3.084187000  | 2.351536000  | 0.749941000  |
| 1 | 3.080010000  | 2.198257000  | -0.996317000 |
| 1 | 2.247789000  | 3.562748000  | -0.231226000 |

**IX-S** (T.E.= -2080.604836)

|    |              |              |              |
|----|--------------|--------------|--------------|
| 6  | -0.695317000 | -0.354106000 | -1.563809000 |
| 6  | 0.689913000  | 0.280966000  | -1.571296000 |
| 6  | 1.380858000  | 0.032404000  | -0.205987000 |
| 6  | -1.381913000 | -0.066416000 | -0.205727000 |
| 1  | -1.290307000 | 0.000084000  | -2.416461000 |
| 1  | -0.590636000 | -1.436368000 | -1.714568000 |
| 1  | 0.578976000  | 1.357496000  | -1.748274000 |
| 1  | 1.285659000  | -0.090958000 | -2.416003000 |
| 14 | 0.002844000  | -0.038303000 | 1.103618000  |
| 14 | -2.397244000 | 1.531523000  | -0.261151000 |
| 14 | -2.464565000 | -1.522445000 | 0.339054000  |
| 14 | 2.415595000  | 1.531612000  | 0.329610000  |

|    |              |              |              |
|----|--------------|--------------|--------------|
| 14 | 2.456848000  | -1.521327000 | -0.248549000 |
| 6  | 3.353611000  | 2.239479000  | -1.130968000 |
| 1  | 2.667514000  | 2.594185000  | -1.903768000 |
| 1  | 3.934365000  | 3.101337000  | -0.789727000 |
| 1  | 4.042103000  | 1.529884000  | -1.590869000 |
| 6  | 3.588711000  | 1.156301000  | 1.741741000  |
| 1  | 4.108657000  | 2.081223000  | 2.007605000  |
| 1  | 3.033704000  | 0.825847000  | 2.623875000  |
| 1  | 4.343418000  | 0.402883000  | 1.513278000  |
| 6  | 1.340907000  | 2.936986000  | 0.973419000  |
| 1  | 1.981991000  | 3.808753000  | 1.136491000  |
| 1  | 0.553366000  | 3.240473000  | 0.281563000  |
| 1  | 0.880082000  | 2.689844000  | 1.933956000  |
| 6  | 2.699227000  | -2.272091000 | 1.451024000  |
| 1  | 3.379991000  | -3.124470000 | 1.370789000  |
| 1  | 3.119550000  | -1.574425000 | 2.176675000  |
| 1  | 1.754428000  | -2.642867000 | 1.858685000  |
| 6  | 1.704436000  | -2.854354000 | -1.334472000 |
| 1  | 2.415091000  | -3.685075000 | -1.377534000 |
| 1  | 0.764251000  | -3.245225000 | -0.945323000 |
| 1  | 1.538924000  | -2.512127000 | -2.358575000 |
| 6  | 4.136351000  | -1.221477000 | -1.038587000 |
| 1  | 4.020770000  | -0.838014000 | -2.056301000 |
| 1  | 4.785791000  | -0.538311000 | -0.490051000 |
| 1  | 4.650558000  | -2.184654000 | -1.108674000 |
| 6  | -1.698684000 | 2.760398000  | -1.500471000 |
| 1  | -0.691258000 | 3.114584000  | -1.282433000 |
| 1  | -1.698662000 | 2.347865000  | -2.512459000 |
| 1  | -2.360770000 | 3.631545000  | -1.504803000 |
| 6  | -4.148980000 | 1.268362000  | -0.888994000 |
| 1  | -4.771846000 | 0.656872000  | -0.234777000 |
| 1  | -4.623248000 | 2.250485000  | -0.977011000 |
| 1  | -4.147953000 | 0.813301000  | -1.883183000 |
| 6  | -2.504576000 | 2.378137000  | 1.407570000  |
| 1  | -3.210017000 | 3.211166000  | 1.337286000  |
| 1  | -2.855250000 | 1.708516000  | 2.195443000  |
| 1  | -1.541654000 | 2.788697000  | 1.722571000  |
| 6  | -1.426712000 | -3.047523000 | 0.723514000  |
| 1  | -1.093847000 | -3.543089000 | -0.190866000 |
| 1  | -0.551385000 | -2.863308000 | 1.353450000  |

|   |              |              |              |
|---|--------------|--------------|--------------|
| 1 | -2.063122000 | -3.758786000 | 1.258563000  |
| 6 | -3.615557000 | -2.087489000 | -1.030960000 |
| 1 | -3.993037000 | -3.083158000 | -0.780375000 |
| 1 | -4.472197000 | -1.430744000 | -1.180826000 |
| 1 | -3.080925000 | -2.169956000 | -1.981054000 |
| 6 | -3.435628000 | -1.138328000 | 1.894007000  |
| 1 | -4.129678000 | -0.303900000 | 1.781467000  |
| 1 | -4.019132000 | -2.020808000 | 2.171051000  |
| 1 | -2.762841000 | -0.911110000 | 2.725002000  |

**Ia-S** (T.E.= -939.250417)

|    |              |              |              |
|----|--------------|--------------|--------------|
| 14 | -0.000004000 | -0.946749000 | -0.366643000 |
| 7  | 1.217053000  | 0.216585000  | 0.179341000  |
| 6  | 0.670945000  | 1.388317000  | 0.680784000  |
| 6  | -0.670939000 | 1.388324000  | 0.680784000  |
| 7  | -1.217051000 | 0.216588000  | 0.179342000  |
| 1  | 1.303539000  | 2.169474000  | 1.077646000  |
| 1  | -1.303528000 | 2.169476000  | 1.077657000  |
| 6  | 2.611141000  | 0.058083000  | 0.050135000  |
| 6  | 3.183794000  | -1.192907000 | 0.259598000  |
| 6  | 4.546997000  | -1.372333000 | 0.111984000  |
| 6  | 5.362494000  | -0.304826000 | -0.224977000 |
| 6  | 4.797072000  | 0.943365000  | -0.426292000 |
| 6  | 3.431761000  | 1.126243000  | -0.299278000 |
| 1  | 2.550677000  | -2.021078000 | 0.560374000  |
| 1  | 4.976399000  | -2.353330000 | 0.279483000  |
| 1  | 6.431899000  | -0.443834000 | -0.327741000 |
| 1  | 5.423201000  | 1.785604000  | -0.697654000 |
| 1  | 2.993449000  | 2.098630000  | -0.492730000 |
| 6  | -2.611141000 | 0.058086000  | 0.050137000  |
| 6  | -3.431765000 | 1.126249000  | -0.299252000 |
| 6  | -4.797076000 | 0.943368000  | -0.426268000 |
| 6  | -5.362494000 | -0.304828000 | -0.224978000 |
| 6  | -4.546992000 | -1.372339000 | 0.111959000  |
| 6  | -3.183789000 | -1.192911000 | 0.259574000  |
| 1  | -2.993463000 | 2.098643000  | -0.492688000 |
| 1  | -5.423208000 | 1.785612000  | -0.697612000 |
| 1  | -6.431899000 | -0.443838000 | -0.327745000 |
| 1  | -4.976388000 | -2.353342000 | 0.279439000  |
| 1  | -2.550672000 | -2.021088000 | 0.560334000  |

**Ib-S** (T.E.= -2726.727271)

|    |              |              |              |
|----|--------------|--------------|--------------|
| 7  | 1.255496000  | 0.338080000  | 0.225692000  |
| 6  | 0.673155000  | 1.517254000  | 0.634186000  |
| 6  | -0.673155000 | 1.517254000  | 0.634186000  |
| 7  | -1.255496000 | 0.338080000  | 0.225692000  |
| 1  | 1.283681000  | 2.338872000  | 0.984416000  |
| 1  | -1.283681000 | 2.338872000  | 0.984415000  |
| 6  | 2.647400000  | 0.210901000  | 0.100321000  |
| 6  | 3.251862000  | -1.018214000 | 0.356220000  |
| 6  | 4.617674000  | -1.173835000 | 0.211172000  |
| 6  | 5.409734000  | -0.103105000 | -0.170267000 |
| 6  | 4.815626000  | 1.123253000  | -0.417547000 |
| 6  | 3.447093000  | 1.281794000  | -0.293050000 |
| 1  | 2.639676000  | -1.847432000 | 0.696526000  |
| 1  | 5.068556000  | -2.138049000 | 0.416215000  |
| 1  | 6.481568000  | -0.222925000 | -0.271151000 |
| 1  | 5.422124000  | 1.968029000  | -0.723845000 |
| 1  | 2.988813000  | 2.236333000  | -0.525001000 |
| 6  | -2.647400000 | 0.210901000  | 0.100321000  |
| 6  | -3.447093000 | 1.281794000  | -0.293049000 |
| 6  | -4.815626000 | 1.123253000  | -0.417547000 |
| 6  | -5.409734000 | -0.103105000 | -0.170267000 |
| 6  | -4.617674000 | -1.173835000 | 0.211171000  |
| 6  | -3.251862000 | -1.018214000 | 0.356220000  |
| 1  | -2.988813000 | 2.236334000  | -0.525001000 |
| 1  | -5.422124000 | 1.968029000  | -0.723844000 |
| 1  | -6.481568000 | -0.222925000 | -0.271151000 |
| 1  | -5.068556000 | -2.138049000 | 0.416214000  |
| 1  | -2.639676000 | -1.847433000 | 0.696525000  |
| 32 | 0.000000000  | -0.983105000 | -0.292701000 |

**H<sub>2</sub>** (T.E.= -1.160757)

|   |             |             |              |
|---|-------------|-------------|--------------|
| 1 | 0.000000000 | 0.000000000 | 0.373348000  |
| 1 | 0.000000000 | 0.000000000 | -0.373348000 |

**NH<sub>3</sub>** (T.E.= -56.509164)

|   |              |              |              |
|---|--------------|--------------|--------------|
| 7 | 0.000000000  | 0.000000000  | 0.114387000  |
| 1 | 0.000000000  | 0.937860000  | -0.266904000 |
| 1 | -0.812210000 | -0.468930000 | -0.266904000 |
| 1 | 0.812210000  | -0.468930000 | -0.266904000 |

**CH<sub>3</sub>Ph** (T.E.= -271.312590)

|   |              |              |              |
|---|--------------|--------------|--------------|
| 6 | -1.190970000 | 1.195862000  | 0.002055000  |
| 6 | 0.193341000  | 1.192933000  | -0.009159000 |
| 6 | 0.907633000  | 0.000323000  | -0.011804000 |
| 6 | 0.193730000  | -1.192699000 | -0.009155000 |
| 6 | -1.190430000 | -1.196162000 | 0.002050000  |
| 6 | -1.889262000 | -0.000226000 | 0.008923000  |
| 1 | -1.727620000 | 2.137968000  | 0.001651000  |
| 1 | 0.735070000  | 2.134048000  | -0.019241000 |
| 1 | 0.735885000  | -2.133590000 | -0.019221000 |
| 1 | -1.726777000 | -2.138442000 | 0.001636000  |
| 1 | -2.972936000 | -0.000478000 | 0.014623000  |
| 6 | 2.402332000  | 0.000128000  | 0.009202000  |
| 1 | 2.780169000  | -0.014336000 | 1.035724000  |
| 1 | 2.809036000  | -0.877697000 | -0.496150000 |
| 1 | 2.808928000  | 0.891574000  | -0.471693000 |

**SiEt<sub>3</sub>H** (T.E.= -527.468352)

|    |              |              |              |
|----|--------------|--------------|--------------|
| 14 | 0.596999000  | 0.082557000  | -0.042389000 |
| 1  | 1.916492000  | -0.607467000 | 0.026270000  |
| 6  | -0.239009000 | -0.391123000 | -1.655928000 |
| 1  | -1.159239000 | 0.197369000  | -1.748271000 |
| 1  | 0.405786000  | -0.069738000 | -2.481385000 |
| 6  | -0.431926000 | -0.483277000 | 1.430181000  |
| 1  | -0.250920000 | 0.213138000  | 2.257162000  |
| 1  | -1.491466000 | -0.365454000 | 1.171225000  |
| 6  | 0.850480000  | 1.941164000  | 0.033495000  |
| 1  | 1.434588000  | 2.165682000  | 0.932706000  |
| 1  | 1.470506000  | 2.252618000  | -0.813760000 |
| 6  | -0.458532000 | 2.719672000  | 0.049195000  |
| 1  | -1.092288000 | 2.421045000  | 0.889418000  |
| 1  | -0.297324000 | 3.796907000  | 0.134155000  |
| 1  | -1.036206000 | 2.552275000  | -0.863562000 |
| 6  | -0.557517000 | -1.874624000 | -1.772014000 |
| 1  | -1.271428000 | -2.185030000 | -1.004269000 |
| 1  | -0.993069000 | -2.131080000 | -2.740660000 |
| 1  | 0.338756000  | -2.488768000 | -1.643819000 |
| 6  | -0.147710000 | -1.909891000 | 1.880072000  |
| 1  | -0.765658000 | -2.206356000 | 2.731261000  |
| 1  | -0.329563000 | -2.631788000 | 1.079644000  |

1 0.897576000 -2.025741000 2.176982000

Cartesian coordinates of the transition states involved in the activation of hydrogen by CAASis (1Si-5Si, 8Si-9Si and 14Si) and CAAGes (1Ge-5Ge, 8Ge-9Ge and 14Ge), along with their total energies (in hartrees) including zero point vibrational correction.

**1SiTS<sup>H-H</sup>** (T.E.= -1511.632841)

6 -0.974082000 -0.707404000 -1.444993000  
6 0.471457000 -0.239741000 -1.570468000  
6 1.148641000 -0.039667000 -0.177028000  
1 -1.521162000 -0.468978000 -2.363050000  
1 -1.023892000 -1.799600000 -1.305299000  
1 0.463061000 0.707807000 -2.120604000  
1 1.038299000 -0.940713000 -2.193139000  
7 -1.560996000 -0.018055000 -0.308586000  
14 -0.351049000 0.148946000 0.939558000  
14 2.242172000 -1.506091000 0.285412000  
14 2.008956000 1.647903000 -0.169815000  
6 2.988790000 1.928259000 1.399831000  
1 3.881671000 1.301680000 1.456638000  
1 3.316305000 2.970655000 1.437290000  
1 2.382186000 1.740669000 2.289965000  
6 0.709723000 3.000402000 -0.281999000  
1 0.097405000 3.059421000 0.622396000  
1 1.209156000 3.965998000 -0.401536000  
1 0.037441000 2.867029000 -1.132733000  
6 3.137861000 1.840407000 -1.653113000  
1 3.476268000 2.878375000 -1.711050000  
1 4.020941000 1.204584000 -1.583907000  
1 2.628100000 1.609810000 -2.591435000  
6 2.574945000 -1.576145000 2.127368000  
1 3.198785000 -2.449016000 2.339057000  
1 3.109412000 -0.694386000 2.485240000  
1 1.659783000 -1.681395000 2.714155000  
6 1.483016000 -3.130258000 -0.264801000  
1 0.519393000 -3.335375000 0.203846000  
1 1.353457000 -3.173148000 -1.349370000  
1 2.169617000 -3.935709000 0.012298000  
6 3.894817000 -1.406669000 -0.600527000  
1 4.523232000 -0.587561000 -0.243445000

|   |              |              |              |
|---|--------------|--------------|--------------|
| 1 | 4.443155000  | -2.338586000 | -0.436292000 |
| 1 | 3.763916000  | -1.287600000 | -1.679659000 |
| 6 | -2.936649000 | -0.016178000 | -0.119127000 |
| 6 | -3.803512000 | -0.732308000 | -0.947761000 |
| 6 | -3.495919000 | 0.729203000  | 0.926354000  |
| 6 | -5.172733000 | -0.693631000 | -0.737066000 |
| 1 | -3.409957000 | -1.332108000 | -1.758642000 |
| 6 | -4.859195000 | 0.755579000  | 1.129166000  |
| 1 | -2.839608000 | 1.302274000  | 1.574776000  |
| 6 | -5.714470000 | 0.044335000  | 0.298514000  |
| 1 | -5.821492000 | -1.259909000 | -1.396317000 |
| 1 | -5.261147000 | 1.346206000  | 1.944901000  |
| 1 | -6.785384000 | 0.068579000  | 0.458758000  |
| 1 | -0.607402000 | -0.673542000 | 2.184813000  |
| 1 | -0.411813000 | -1.546801000 | 1.424168000  |

**2SiTS<sup>H-H</sup>** (T.E.= -1510.439678)

|    |              |              |              |
|----|--------------|--------------|--------------|
| 6  | -0.814529000 | -0.428569000 | -1.570821000 |
| 6  | 0.500194000  | -0.192436000 | -1.533137000 |
| 6  | 1.165187000  | -0.099355000 | -0.181195000 |
| 7  | -1.469877000 | -0.626397000 | -0.349791000 |
| 14 | -0.239149000 | -0.714640000 | 0.912486000  |
| 14 | 2.732685000  | -1.145284000 | -0.079685000 |
| 14 | 1.346798000  | 1.749100000  | 0.232690000  |
| 6  | 2.269365000  | 1.986221000  | 1.844078000  |
| 1  | 3.305926000  | 1.646652000  | 1.792764000  |
| 1  | 2.280557000  | 3.048201000  | 2.102961000  |
| 1  | 1.775005000  | 1.452774000  | 2.660844000  |
| 6  | -0.353254000 | 2.518663000  | 0.428562000  |
| 1  | -0.902025000 | 2.128379000  | 1.290915000  |
| 1  | -0.236112000 | 3.595356000  | 0.581489000  |
| 1  | -0.971864000 | 2.376953000  | -0.461016000 |
| 6  | 2.207280000  | 2.663468000  | -1.154731000 |
| 1  | 2.194230000  | 3.734718000  | -0.936625000 |
| 1  | 3.247066000  | 2.361092000  | -1.285579000 |
| 1  | 1.684941000  | 2.514471000  | -2.102708000 |
| 6  | 3.112286000  | -1.590200000 | 1.699478000  |
| 1  | 4.066393000  | -2.122362000 | 1.743454000  |
| 1  | 3.195000000  | -0.705536000 | 2.334105000  |
| 1  | 2.354400000  | -2.247985000 | 2.132469000  |



|   |              |              |              |
|---|--------------|--------------|--------------|
| 6 | 2.537721000  | -2.701935000 | -1.099109000 |
| 1 | 1.660605000  | -3.286801000 | -0.817016000 |
| 1 | 2.452878000  | -2.459019000 | -2.160946000 |
| 1 | 3.423511000  | -3.329615000 | -0.968550000 |
| 6 | 4.205419000  | -0.240187000 | -0.807048000 |
| 1 | 4.518324000  | 0.629457000  | -0.225287000 |
| 1 | 5.053807000  | -0.929018000 | -0.852081000 |
| 1 | 3.997855000  | 0.089977000  | -1.828847000 |
| 6 | -2.837556000 | -0.429313000 | -0.184491000 |
| 6 | -3.613567000 | 0.241068000  | -1.132283000 |
| 6 | -3.462822000 | -0.894693000 | 0.974518000  |
| 6 | -4.969076000 | 0.423203000  | -0.924578000 |
| 1 | -3.151155000 | 0.645463000  | -2.024710000 |
| 6 | -4.813490000 | -0.691806000 | 1.179296000  |
| 1 | -2.874748000 | -1.427856000 | 1.715110000  |
| 6 | -5.581276000 | -0.036886000 | 0.229135000  |
| 1 | -5.550834000 | 0.948292000  | -1.673977000 |
| 1 | -5.272870000 | -1.061248000 | 2.089234000  |
| 1 | -6.642158000 | 0.114006000  | 0.387013000  |
| 1 | -0.211400000 | -1.997159000 | 1.712465000  |
| 1 | 0.132409000  | -2.386252000 | 0.648149000  |
| 1 | -1.392743000 | -0.501134000 | -2.484390000 |
| 1 | 1.076185000  | -0.058928000 | -2.443622000 |

**3SiTS<sup>H-H</sup>** (T.E.= -1631.735980)

|    |              |              |              |
|----|--------------|--------------|--------------|
| 6  | 0.729064000  | 1.308607000  | 0.509445000  |
| 6  | 1.418358000  | 0.021246000  | -0.045835000 |
| 1  | 0.955574000  | 1.439357000  | 1.575729000  |
| 1  | 1.139564000  | 2.207264000  | 0.030620000  |
| 7  | -1.318480000 | 0.114525000  | -0.405857000 |
| 14 | 0.039294000  | -0.803740000 | -1.022583000 |
| 14 | 2.915861000  | 0.411779000  | -1.119512000 |
| 14 | 1.752608000  | -1.178700000 | 1.378305000  |
| 6  | 2.638769000  | -2.723931000 | 0.797358000  |
| 1  | 3.673142000  | -2.527514000 | 0.505452000  |
| 1  | 2.661031000  | -3.450944000 | 1.613778000  |
| 1  | 2.128036000  | -3.192114000 | -0.048267000 |
| 6  | 0.128047000  | -1.712685000 | 2.160636000  |
| 1  | -0.534370000 | -2.231674000 | 1.461140000  |
| 1  | 0.345515000  | -2.406121000 | 2.978309000  |

|   |              |              |              |
|---|--------------|--------------|--------------|
| 1 | -0.424796000 | -0.869291000 | 2.583778000  |
| 6 | 2.761561000  | -0.390766000 | 2.749031000  |
| 1 | 2.798292000  | -1.087139000 | 3.591586000  |
| 1 | 3.787511000  | -0.178245000 | 2.446291000  |
| 1 | 2.316533000  | 0.537518000  | 3.114011000  |
| 6 | 3.282442000  | -0.976763000 | -2.324762000 |
| 1 | 4.213577000  | -0.750590000 | -2.852011000 |
| 1 | 3.407777000  | -1.940289000 | -1.827837000 |
| 1 | 2.500904000  | -1.085442000 | -3.080406000 |
| 6 | 2.654969000  | 1.994378000  | -2.094446000 |
| 1 | 1.689876000  | 2.031875000  | -2.603418000 |
| 1 | 2.739054000  | 2.876798000  | -1.455434000 |
| 1 | 3.439699000  | 2.064625000  | -2.853252000 |
| 6 | 4.455554000  | 0.718936000  | -0.091261000 |
| 1 | 4.834548000  | -0.180055000 | 0.398948000  |
| 1 | 5.247143000  | 1.099827000  | -0.742883000 |
| 1 | 4.267089000  | 1.474659000  | 0.676586000  |
| 6 | -2.620324000 | -0.415709000 | -0.429098000 |
| 6 | -3.354932000 | -0.545325000 | 0.748780000  |
| 6 | -3.187298000 | -0.858137000 | -1.620753000 |
| 6 | -4.629520000 | -1.078953000 | 0.726533000  |
| 1 | -2.906957000 | -0.221389000 | 1.682954000  |
| 6 | -4.460168000 | -1.403395000 | -1.636949000 |
| 1 | -2.625344000 | -0.751366000 | -2.543299000 |
| 6 | -5.190298000 | -1.511429000 | -0.466015000 |
| 1 | -5.186781000 | -1.169192000 | 1.652189000  |
| 1 | -4.885142000 | -1.740072000 | -2.575750000 |
| 1 | -6.188084000 | -1.933370000 | -0.479898000 |
| 1 | 0.084420000  | -0.965210000 | -2.533659000 |
| 1 | 0.329592000  | 0.156991000  | -2.464105000 |
| 5 | -0.849325000 | 1.300530000  | 0.277453000  |
| 7 | -1.658695000 | 2.394939000  | 0.652647000  |
| 6 | -3.016163000 | 2.628827000  | 0.217831000  |
| 1 | -3.315085000 | 1.925812000  | -0.556295000 |
| 1 | -3.731602000 | 2.549126000  | 1.046501000  |
| 1 | -3.103436000 | 3.640783000  | -0.194595000 |
| 6 | -1.168261000 | 3.484962000  | 1.462229000  |
| 1 | -1.812781000 | 3.638032000  | 2.336431000  |
| 1 | -0.159215000 | 3.292816000  | 1.821400000  |
| 1 | -1.157913000 | 4.425712000  | 0.897320000  |

**4SiTS<sup>H-H</sup>** (T.E.= -1841.647014)

|    |              |              |              |
|----|--------------|--------------|--------------|
| 6  | 0.864400000  | 0.863790000  | 1.243251000  |
| 6  | 1.376277000  | -0.000938000 | 0.041239000  |
| 1  | 0.938543000  | 0.310316000  | 2.187822000  |
| 1  | 1.484842000  | 1.755202000  | 1.391885000  |
| 7  | -1.457685000 | 0.267112000  | -0.183575000 |
| 14 | -0.096321000 | -0.307769000 | -1.109876000 |
| 14 | 2.781791000  | 0.888123000  | -0.849886000 |
| 14 | 1.810217000  | -1.724823000 | 0.694450000  |
| 6  | 2.543067000  | -2.823280000 | -0.633155000 |
| 1  | 3.539321000  | -2.495300000 | -0.938840000 |
| 1  | 2.634997000  | -3.841478000 | -0.245362000 |
| 1  | 1.908318000  | -2.861629000 | -1.522176000 |
| 6  | 0.241911000  | -2.552225000 | 1.321221000  |
| 1  | -0.444084000 | -2.813892000 | 0.510940000  |
| 1  | 0.510779000  | -3.481923000 | 1.830470000  |
| 1  | -0.307720000 | -1.931570000 | 2.033957000  |
| 6  | 3.004292000  | -1.659696000 | 2.140203000  |
| 1  | 3.030925000  | -2.645963000 | 2.611755000  |
| 1  | 4.019490000  | -1.411644000 | 1.828179000  |
| 1  | 2.703200000  | -0.939561000 | 2.903868000  |
| 6  | 3.083888000  | 0.195555000  | -2.565008000 |
| 1  | 3.908919000  | 0.746618000  | -3.025138000 |
| 1  | 3.360065000  | -0.859961000 | -2.547416000 |
| 1  | 2.215939000  | 0.304966000  | -3.219304000 |
| 6  | 2.437533000  | 2.726162000  | -1.019846000 |
| 1  | 1.567311000  | 2.939100000  | -1.643322000 |
| 1  | 2.291207000  | 3.218939000  | -0.055749000 |
| 1  | 3.309040000  | 3.187626000  | -1.493813000 |
| 6  | 4.379990000  | 0.768666000  | 0.127688000  |
| 1  | 4.826001000  | -0.227404000 | 0.094545000  |
| 1  | 5.106848000  | 1.469461000  | -0.292149000 |
| 1  | 4.229228000  | 1.035173000  | 1.177362000  |
| 6  | -2.781772000 | -0.131719000 | -0.417157000 |
| 6  | -3.843645000 | 0.742661000  | -0.183345000 |
| 6  | -3.085514000 | -1.415564000 | -0.875394000 |
| 6  | -5.154010000 | 0.343225000  | -0.378934000 |
| 1  | -3.635071000 | 1.757102000  | 0.139588000  |
| 6  | -4.394638000 | -1.806914000 | -1.079528000 |
| 1  | -2.277172000 | -2.112788000 | -1.073004000 |

|    |              |              |              |
|----|--------------|--------------|--------------|
| 6  | -5.441567000 | -0.933837000 | -0.828333000 |
| 1  | -5.956773000 | 1.046475000  | -0.187270000 |
| 1  | -4.598443000 | -2.811760000 | -1.432436000 |
| 1  | -6.467260000 | -1.244517000 | -0.985986000 |
| 1  | -0.081356000 | 0.205822000  | -2.541349000 |
| 1  | 0.160758000  | 1.179713000  | -1.989375000 |
| 14 | -0.942371000 | 1.385181000  | 1.061169000  |
| 6  | -1.870749000 | 1.102522000  | 2.653563000  |
| 1  | -2.890282000 | 1.489676000  | 2.629435000  |
| 1  | -1.919182000 | 0.033726000  | 2.878379000  |
| 1  | -1.346442000 | 1.595396000  | 3.476402000  |
| 6  | -1.054175000 | 3.169697000  | 0.521921000  |
| 1  | -0.480253000 | 3.804506000  | 1.202632000  |
| 1  | -0.634364000 | 3.292397000  | -0.479648000 |
| 1  | -2.081673000 | 3.538788000  | 0.507828000  |

**5SiTS<sup>H-H</sup>** (T.E.= -1585.698680 )

|    |              |              |              |
|----|--------------|--------------|--------------|
| 6  | 0.562347000  | -0.517495000 | 1.481947000  |
| 6  | 1.231011000  | -0.148513000 | 0.138199000  |
| 1  | 0.720094000  | -1.576575000 | 1.722773000  |
| 1  | 0.959056000  | 0.048919000  | 2.329959000  |
| 14 | -0.205662000 | -0.391572000 | -1.039402000 |
| 7  | -1.464754000 | -0.344503000 | 0.203605000  |
| 14 | 2.706465000  | -1.256049000 | -0.287091000 |
| 14 | 1.599567000  | 1.719744000  | 0.093487000  |
| 6  | 2.450710000  | -2.993338000 | 0.366784000  |
| 1  | 1.509313000  | -3.444676000 | 0.048007000  |
| 1  | 3.265967000  | -3.617468000 | -0.010440000 |
| 1  | 2.494480000  | -3.027134000 | 1.457992000  |
| 6  | 4.287031000  | -0.646371000 | 0.511745000  |
| 1  | 5.072994000  | -1.387555000 | 0.342174000  |
| 1  | 4.637504000  | 0.306112000  | 0.110473000  |
| 1  | 4.162756000  | -0.538243000 | 1.592656000  |
| 6  | 2.633089000  | 2.251494000  | 1.560927000  |
| 1  | 3.634820000  | 1.821433000  | 1.563680000  |
| 1  | 2.736352000  | 3.339696000  | 1.525069000  |
| 1  | 2.152642000  | 2.005967000  | 2.510726000  |
| 6  | 2.461472000  | 2.197527000  | -1.496501000 |
| 1  | 2.543414000  | 3.286941000  | -1.537643000 |
| 1  | 3.471498000  | 1.789165000  | -1.574156000 |

|   |              |              |              |
|---|--------------|--------------|--------------|
| 1 | 1.894557000  | 1.876999000  | -2.374597000 |
| 6 | 2.953682000  | -1.345020000 | -2.141444000 |
| 1 | 3.069120000  | -0.361972000 | -2.601451000 |
| 1 | 3.861777000  | -1.917115000 | -2.350648000 |
| 1 | 2.128810000  | -1.857435000 | -2.643259000 |
| 6 | 0.002846000  | 2.700463000  | 0.196266000  |
| 1 | -0.665768000 | 2.532258000  | -0.652393000 |
| 1 | -0.556320000 | 2.498977000  | 1.113409000  |
| 1 | 0.258260000  | 3.764189000  | 0.197692000  |
| 6 | -2.854121000 | -0.240178000 | -0.050463000 |
| 6 | -3.781859000 | -0.950971000 | 0.702225000  |
| 6 | -3.298072000 | 0.562646000  | -1.095040000 |
| 6 | -5.130312000 | -0.847968000 | 0.411866000  |
| 1 | -3.442569000 | -1.576381000 | 1.516543000  |
| 6 | -4.647194000 | 0.654941000  | -1.384573000 |
| 1 | -2.575481000 | 1.117392000  | -1.685562000 |
| 6 | -5.570637000 | -0.048526000 | -0.630179000 |
| 1 | -5.844668000 | -1.404907000 | 1.007166000  |
| 1 | -4.976254000 | 1.285505000  | -2.202347000 |
| 1 | -6.628287000 | 0.024877000  | -0.853634000 |
| 6 | -0.946512000 | -0.335682000 | 1.483161000  |
| 8 | -1.587961000 | -0.211388000 | 2.499741000  |
| 1 | -0.375120000 | -1.534641000 | -2.012207000 |
| 1 | -0.078066000 | -2.119501000 | -1.030585000 |

**8SiTS<sup>H-H</sup> (T.E.= -1154.306988)**

|    |              |              |              |
|----|--------------|--------------|--------------|
| 6  | 0.522609000  | -1.629363000 | -0.060486000 |
| 6  | -0.985722000 | -1.614945000 | 0.190593000  |
| 6  | -1.529154000 | -0.242258000 | -0.183783000 |
| 1  | 1.009516000  | -2.375879000 | 0.576036000  |
| 1  | 0.717560000  | -1.905133000 | -1.111331000 |
| 1  | -1.172326000 | -1.841434000 | 1.250528000  |
| 1  | -1.437297000 | -2.432317000 | -0.387084000 |
| 7  | 1.061859000  | -0.301945000 | 0.201881000  |
| 14 | -0.141403000 | 0.869011000  | -0.315735000 |
| 6  | 2.429459000  | -0.100109000 | 0.131056000  |
| 6  | 3.331501000  | -1.132407000 | -0.146492000 |
| 6  | 2.955843000  | 1.180838000  | 0.349627000  |
| 6  | 4.694819000  | -0.887820000 | -0.188832000 |
| 1  | 2.970330000  | -2.134674000 | -0.336355000 |

|    |              |              |              |
|----|--------------|--------------|--------------|
| 6  | 4.313587000  | 1.413045000  | 0.298548000  |
| 1  | 2.273414000  | 1.994628000  | 0.577124000  |
| 6  | 5.201336000  | 0.379593000  | 0.030524000  |
| 1  | 5.368680000  | -1.709903000 | -0.405026000 |
| 1  | 4.686009000  | 2.416180000  | 0.475595000  |
| 1  | 6.268248000  | 0.563329000  | -0.006525000 |
| 1  | 0.314698000  | 1.763021000  | -1.440053000 |
| 1  | 0.427039000  | 0.715983000  | -2.091897000 |
| 15 | -3.143550000 | 0.145539000  | 0.022381000  |
| 6  | -3.459913000 | 1.892760000  | -0.250936000 |
| 1  | -3.179653000 | 2.162198000  | -1.269691000 |
| 1  | -4.520298000 | 2.101926000  | -0.101457000 |
| 1  | -2.869663000 | 2.487529000  | 0.447223000  |
| 6  | -4.277311000 | -0.731819000 | -1.083145000 |
| 1  | -4.136021000 | -1.807127000 | -0.957013000 |
| 1  | -5.317929000 | -0.483818000 | -0.864204000 |
| 1  | -4.044931000 | -0.472086000 | -2.116260000 |
| 6  | -3.827853000 | -0.241753000 | 1.655563000  |
| 1  | -3.308560000 | 0.344755000  | 2.414304000  |
| 1  | -4.898997000 | -0.036350000 | 1.698837000  |
| 1  | -3.665149000 | -1.301023000 | 1.865236000  |

**9SiTS<sup>H-H</sup> (T.E.= -1153.120910)**

|    |              |              |              |
|----|--------------|--------------|--------------|
| 6  | -0.429144000 | -1.535915000 | -0.254590000 |
| 6  | 0.910248000  | -1.549524000 | -0.133485000 |
| 6  | 1.528901000  | -0.315742000 | 0.332567000  |
| 14 | 0.178730000  | 0.869728000  | 0.429156000  |
| 7  | -1.053992000 | -0.312905000 | 0.046970000  |
| 15 | 3.141721000  | 0.061382000  | 0.022940000  |
| 6  | 4.309309000  | -1.127817000 | 0.706389000  |
| 1  | 4.049063000  | -2.123857000 | 0.343285000  |
| 1  | 5.329954000  | -0.893897000 | 0.398478000  |
| 1  | 4.238602000  | -1.124812000 | 1.794048000  |
| 6  | 3.555120000  | 1.676124000  | 0.689488000  |
| 1  | 4.620171000  | 1.874102000  | 0.561424000  |
| 1  | 2.988719000  | 2.442672000  | 0.155958000  |
| 1  | 3.301273000  | 1.713797000  | 1.748943000  |
| 6  | 3.558223000  | 0.135035000  | -1.733832000 |
| 1  | 2.887102000  | 0.846544000  | -2.219419000 |
| 1  | 4.596195000  | 0.432192000  | -1.893879000 |

|   |              |              |              |
|---|--------------|--------------|--------------|
| 1 | 3.390670000  | -0.850054000 | -2.173806000 |
| 6 | -2.432493000 | -0.133897000 | 0.015109000  |
| 6 | -2.953343000 | 1.143708000  | -0.200167000 |
| 6 | -3.324326000 | -1.192716000 | 0.196302000  |
| 6 | -4.318724000 | 1.355629000  | -0.219237000 |
| 1 | -2.273746000 | 1.971002000  | -0.379372000 |
| 6 | -4.688545000 | -0.971895000 | 0.162504000  |
| 1 | -2.945842000 | -2.189524000 | 0.387882000  |
| 6 | -5.198883000 | 0.300370000  | -0.041389000 |
| 1 | -4.698094000 | 2.356910000  | -0.389948000 |
| 1 | -5.363036000 | -1.808310000 | 0.308961000  |
| 1 | -6.269137000 | 0.466446000  | -0.063611000 |
| 1 | -1.039556000 | -2.374220000 | -0.558533000 |
| 1 | 1.482008000  | -2.449226000 | -0.339172000 |
| 1 | 0.073023000  | 2.259663000  | -0.131726000 |
| 1 | 0.284471000  | 1.843817000  | -1.348547000 |

**14SiTS<sup>H-H</sup>** (T.E.= -1348.475296)

|    |              |              |              |
|----|--------------|--------------|--------------|
| 6  | 1.670935000  | -0.316999000 | 0.028498000  |
| 7  | -0.981012000 | -0.248114000 | -0.141993000 |
| 14 | 0.280476000  | -1.461441000 | -0.136428000 |
| 6  | -2.328184000 | -0.613124000 | 0.036949000  |
| 6  | -3.074682000 | -0.093898000 | 1.092774000  |
| 6  | -2.930092000 | -1.529800000 | -0.820121000 |
| 6  | -4.394340000 | -0.465430000 | 1.268546000  |
| 1  | -2.602644000 | 0.607553000  | 1.772805000  |
| 6  | -4.249528000 | -1.907381000 | -0.634359000 |
| 1  | -2.358066000 | -1.924178000 | -1.654404000 |
| 6  | -4.990161000 | -1.373921000 | 0.406276000  |
| 1  | -4.961312000 | -0.048528000 | 2.093305000  |
| 1  | -4.702705000 | -2.619019000 | -1.315215000 |
| 1  | -6.023798000 | -1.666012000 | 0.548580000  |
| 1  | 0.173267000  | -2.599273000 | -1.124162000 |
| 1  | 0.379625000  | -1.769233000 | -1.952625000 |
| 15 | 3.351860000  | -0.585540000 | 0.097107000  |
| 6  | 4.134146000  | -0.028262000 | 1.617802000  |
| 1  | 5.213899000  | -0.181843000 | 1.573742000  |
| 1  | 3.912611000  | 1.032101000  | 1.739069000  |
| 1  | 3.718144000  | -0.580093000 | 2.461079000  |
| 6  | 3.698178000  | -2.342218000 | -0.052035000 |

|   |              |              |              |
|---|--------------|--------------|--------------|
| 1 | 3.294494000  | -2.711030000 | -0.997202000 |
| 1 | 4.774613000  | -2.518165000 | -0.027742000 |
| 1 | 3.225857000  | -2.882571000 | 0.769456000  |
| 6 | 4.252613000  | 0.219539000  | -1.235775000 |
| 1 | 4.062663000  | 1.291129000  | -1.178623000 |
| 1 | 5.323413000  | 0.026029000  | -1.149292000 |
| 1 | 3.885134000  | -0.158678000 | -2.190573000 |
| 6 | 1.194634000  | 1.031764000  | 0.097537000  |
| 8 | 1.953227000  | 2.004307000  | 0.274715000  |
| 5 | -0.412715000 | 1.089586000  | -0.110145000 |
| 7 | -1.132040000 | 2.279471000  | -0.318845000 |
| 6 | -2.478531000 | 2.366088000  | -0.834262000 |
| 1 | -2.813007000 | 1.419057000  | -1.252782000 |
| 1 | -3.195770000 | 2.667064000  | -0.059292000 |
| 1 | -2.517015000 | 3.120020000  | -1.628248000 |
| 6 | -0.578378000 | 3.590162000  | -0.047441000 |
| 1 | -1.192961000 | 4.115488000  | 0.694556000  |
| 1 | 0.441072000  | 3.499741000  | 0.320804000  |
| 1 | -0.572613000 | 4.202699000  | -0.957311000 |

**1GeTS<sup>H-H</sup>** (T.E.= -3299.096076)

|    |              |              |              |
|----|--------------|--------------|--------------|
| 6  | -0.946325000 | 0.572631000  | 1.565920000  |
| 6  | 0.521227000  | 0.179289000  | 1.665527000  |
| 6  | 1.212156000  | 0.049671000  | 0.277019000  |
| 1  | -1.432887000 | 0.400037000  | 2.532842000  |
| 1  | -1.043032000 | 1.647333000  | 1.334670000  |
| 1  | 0.562503000  | -0.776833000 | 2.200398000  |
| 1  | 1.052691000  | 0.899207000  | 2.298738000  |
| 32 | -0.340137000 | -0.379368000 | -0.870473000 |
| 7  | -1.567793000 | -0.235773000 | 0.537804000  |
| 14 | 2.064074000  | 1.649852000  | -0.256225000 |
| 14 | 2.300468000  | -1.499246000 | 0.277850000  |
| 6  | 1.219002000  | -3.024650000 | 0.448178000  |
| 1  | 0.634866000  | -3.215020000 | -0.456614000 |
| 1  | 1.857584000  | -3.896895000 | 0.613054000  |
| 1  | 0.523336000  | -2.960778000 | 1.288094000  |
| 6  | 3.274869000  | -1.670010000 | -1.310274000 |
| 1  | 4.044663000  | -0.901521000 | -1.411103000 |
| 1  | 3.774220000  | -2.642383000 | -1.321751000 |
| 1  | 2.625957000  | -1.621212000 | -2.189166000 |



|   |              |              |              |
|---|--------------|--------------|--------------|
| 6 | 3.482082000  | -1.484616000 | 1.732829000  |
| 1 | 2.967027000  | -1.292139000 | 2.676829000  |
| 1 | 3.956553000  | -2.466478000 | 1.813521000  |
| 1 | 4.273336000  | -0.741380000 | 1.624101000  |
| 6 | 2.346992000  | 1.707254000  | -2.106331000 |
| 1 | 1.411415000  | 1.699250000  | -2.670350000 |
| 1 | 2.865071000  | 2.638523000  | -2.352192000 |
| 1 | 2.967644000  | 0.882108000  | -2.459824000 |
| 6 | 1.092683000  | 3.166253000  | 0.259666000  |
| 1 | 0.950878000  | 3.212942000  | 1.342279000  |
| 1 | 1.661402000  | 4.053079000  | -0.034966000 |
| 1 | 0.113109000  | 3.219511000  | -0.217927000 |
| 6 | 3.733570000  | 1.800819000  | 0.590106000  |
| 1 | 3.650094000  | 1.694618000  | 1.675094000  |
| 1 | 4.455873000  | 1.063685000  | 0.232180000  |
| 1 | 4.145280000  | 2.793072000  | 0.386194000  |
| 6 | -2.928202000 | -0.119566000 | 0.305647000  |
| 6 | -3.527678000 | -0.867161000 | -0.717560000 |
| 6 | -3.751464000 | 0.713329000  | 1.070241000  |
| 6 | -4.881602000 | -0.782714000 | -0.962507000 |
| 1 | -2.910505000 | -1.536014000 | -1.310640000 |
| 6 | -5.112409000 | 0.784287000  | 0.818363000  |
| 1 | -3.329352000 | 1.312686000  | 1.866533000  |
| 6 | -5.691073000 | 0.045043000  | -0.196190000 |
| 1 | -5.313481000 | -1.377670000 | -1.759680000 |
| 1 | -5.725443000 | 1.437952000  | 1.429416000  |
| 1 | -6.755156000 | 0.107753000  | -0.388396000 |
| 1 | -0.821472000 | 0.295669000  | -2.190675000 |
| 1 | -0.669777000 | 1.333455000  | -1.406702000 |

**2GeTS<sup>H-H</sup> (T.E.= -3296.726623)**

|    |              |              |              |
|----|--------------|--------------|--------------|
| 6  | 0.822604000  | 0.134214000  | -1.648380000 |
| 6  | -0.500834000 | -0.060413000 | -1.597745000 |
| 6  | -1.215517000 | -0.003178000 | -0.274159000 |
| 32 | 0.226036000  | 0.704129000  | 0.876031000  |
| 7  | 1.505809000  | 0.462706000  | -0.486745000 |
| 14 | -2.734529000 | 1.118564000  | -0.310416000 |
| 14 | -1.477166000 | -1.798489000 | 0.303334000  |
| 6  | 0.190019000  | -2.601825000 | 0.612331000  |
| 1  | 0.706110000  | -2.189567000 | 1.484388000  |

|   |              |              |              |
|---|--------------|--------------|--------------|
| 1 | 0.042842000  | -3.669386000 | 0.798090000  |
| 1 | 0.851896000  | -2.502309000 | -0.252013000 |
| 6 | -2.460568000 | -1.856624000 | 1.895865000  |
| 1 | -3.493307000 | -1.526381000 | 1.763535000  |
| 1 | -2.487361000 | -2.882771000 | 2.271596000  |
| 1 | -2.002131000 | -1.234643000 | 2.669932000  |
| 6 | -2.332565000 | -2.797148000 | -1.027418000 |
| 1 | -1.751651000 | -2.788055000 | -1.952491000 |
| 1 | -2.409036000 | -3.836572000 | -0.697080000 |
| 1 | -3.339596000 | -2.442950000 | -1.251609000 |
| 6 | -3.147714000 | 1.718104000  | 1.415120000  |
| 1 | -2.370171000 | 2.372723000  | 1.817498000  |
| 1 | -4.074115000 | 2.297961000  | 1.385877000  |
| 1 | -3.295157000 | 0.894054000  | 2.116279000  |
| 6 | -2.435804000 | 2.579270000  | -1.437611000 |
| 1 | -2.329883000 | 2.255999000  | -2.475899000 |
| 1 | -3.290545000 | 3.259143000  | -1.383119000 |
| 1 | -1.537462000 | 3.135844000  | -1.164515000 |
| 6 | -4.215406000 | 0.206468000  | -1.012119000 |
| 1 | -3.979630000 | -0.234055000 | -1.984843000 |
| 1 | -4.586650000 | -0.586797000 | -0.359902000 |
| 1 | -5.031509000 | 0.918630000  | -1.162707000 |
| 6 | 2.869144000  | 0.278394000  | -0.321127000 |
| 6 | 3.527777000  | 0.918697000  | 0.732100000  |
| 6 | 3.619682000  | -0.539686000 | -1.170188000 |
| 6 | 4.884837000  | 0.752009000  | 0.924045000  |
| 1 | 2.959800000  | 1.565784000  | 1.393713000  |
| 6 | 4.981430000  | -0.687589000 | -0.976836000 |
| 1 | 3.128694000  | -1.080388000 | -1.970947000 |
| 6 | 5.626934000  | -0.046846000 | 0.067648000  |
| 1 | 5.370660000  | 1.262555000  | 1.748088000  |
| 1 | 5.542513000  | -1.328296000 | -1.648159000 |
| 1 | 6.692694000  | -0.171014000 | 0.215370000  |
| 1 | 0.326765000  | 2.052754000  | 1.646987000  |
| 1 | -0.063746000 | 2.433643000  | 0.449290000  |
| 1 | 1.389288000  | 0.082920000  | -2.571764000 |
| 1 | -1.063531000 | -0.274022000 | -2.501378000 |

**3GeTS<sup>H-H</sup>** (T.E.= -3419.198949)

|    |              |              |              |
|----|--------------|--------------|--------------|
| 6  | -0.745157000 | 1.389664000  | -0.381767000 |
| 6  | -1.445303000 | 0.046782000  | -0.020476000 |
| 32 | 0.016724000  | -1.263649000 | -0.265291000 |
| 7  | 1.390361000  | 0.006008000  | -0.379078000 |
| 14 | -1.986785000 | 0.096107000  | 1.785389000  |
| 14 | -2.771974000 | -0.348839000 | -1.299563000 |
| 6  | -1.947184000 | -0.633368000 | -2.963247000 |
| 1  | -1.418978000 | -1.590266000 | -2.991446000 |
| 1  | -2.702619000 | -0.651596000 | -3.753357000 |
| 1  | -1.229180000 | 0.152624000  | -3.212525000 |
| 6  | -3.726979000 | -1.893173000 | -0.846585000 |
| 1  | -4.396072000 | -1.719722000 | -0.000634000 |
| 1  | -4.339506000 | -2.214100000 | -1.692955000 |
| 1  | -3.059875000 | -2.720011000 | -0.586341000 |
| 6  | -3.966628000 | 1.082459000  | -1.496675000 |
| 1  | -3.444426000 | 2.029040000  | -1.655325000 |
| 1  | -4.601088000 | 0.905063000  | -2.369112000 |
| 1  | -4.617821000 | 1.200247000  | -0.629314000 |
| 6  | -2.469064000 | -1.587548000 | 2.453785000  |
| 1  | -1.727424000 | -2.361546000 | 2.246026000  |
| 1  | -2.576478000 | -1.521479000 | 3.539859000  |
| 1  | -3.427697000 | -1.915375000 | 2.047228000  |
| 6  | -0.631716000 | 0.854473000  | 2.837881000  |
| 1  | -0.415889000 | 1.884026000  | 2.539270000  |
| 1  | -0.959062000 | 0.875638000  | 3.881035000  |
| 1  | 0.296520000  | 0.281334000  | 2.788755000  |
| 6  | -3.491543000 | 1.208101000  | 1.966402000  |
| 1  | -3.354462000 | 2.172427000  | 1.470402000  |
| 1  | -4.391030000 | 0.741978000  | 1.556430000  |
| 1  | -3.674812000 | 1.402674000  | 3.026700000  |
| 6  | 2.692430000  | -0.447448000 | -0.116253000 |
| 6  | 3.306380000  | -1.373860000 | -0.955807000 |
| 6  | 3.377679000  | -0.016350000 | 1.018811000  |
| 6  | 4.581248000  | -1.837797000 | -0.680697000 |
| 1  | 2.772700000  | -1.711656000 | -1.838693000 |
| 6  | 4.655760000  | -0.473292000 | 1.283568000  |
| 1  | 2.892369000  | 0.692169000  | 1.682634000  |
| 6  | 5.264583000  | -1.386500000 | 0.436275000  |
| 1  | 5.046401000  | -2.552571000 | -1.350093000 |

|   |              |              |              |
|---|--------------|--------------|--------------|
| 1 | 5.178039000  | -0.119508000 | 2.165352000  |
| 1 | 6.264279000  | -1.746613000 | 0.648102000  |
| 1 | 0.444529000  | -2.508326000 | 0.578098000  |
| 1 | 0.389021000  | -1.621936000 | 1.502300000  |
| 5 | 0.854302000  | 1.332180000  | -0.417606000 |
| 7 | 1.615601000  | 2.516994000  | -0.582544000 |
| 6 | 1.055357000  | 3.842772000  | -0.480365000 |
| 1 | 1.634121000  | 4.454021000  | 0.223401000  |
| 1 | 1.074010000  | 4.360745000  | -1.448341000 |
| 1 | 0.026048000  | 3.818238000  | -0.128684000 |
| 6 | 3.010847000  | 2.567771000  | -0.951683000 |
| 1 | 3.641334000  | 2.930056000  | -0.128855000 |
| 1 | 3.381633000  | 1.592070000  | -1.256994000 |
| 1 | 3.147058000  | 3.256225000  | -1.794249000 |
| 1 | -1.065919000 | 1.742227000  | -1.373638000 |
| 1 | -1.088085000 | 2.177923000  | 0.298969000  |

**4GeTS<sup>H-H</sup>** (T.E.= -3629.106442)

|    |              |              |              |
|----|--------------|--------------|--------------|
| 6  | 0.906607000  | 0.089016000  | 1.586081000  |
| 6  | 1.441697000  | -0.010062000 | 0.126068000  |
| 1  | 1.226310000  | -0.783860000 | 2.171371000  |
| 1  | 1.337398000  | 0.955658000  | 2.105500000  |
| 7  | -1.479917000 | 0.047455000  | 0.065329000  |
| 14 | 2.887925000  | -1.233279000 | 0.076356000  |
| 14 | 1.864714000  | 1.719414000  | -0.546992000 |
| 6  | 2.378031000  | -2.969916000 | 0.568118000  |
| 1  | 1.804917000  | -3.473875000 | -0.211796000 |
| 1  | 3.289862000  | -3.549281000 | 0.742986000  |
| 1  | 1.785981000  | -2.997232000 | 1.485785000  |
| 6  | 4.208341000  | -0.730953000 | 1.312519000  |
| 1  | 4.922337000  | -1.553155000 | 1.409952000  |
| 1  | 4.761795000  | 0.157289000  | 1.009087000  |
| 1  | 3.786463000  | -0.543170000 | 2.302833000  |
| 6  | 3.443705000  | 2.393781000  | 0.203459000  |
| 1  | 4.334757000  | 1.910408000  | -0.201808000 |
| 1  | 3.508212000  | 3.459389000  | -0.033777000 |
| 1  | 3.463982000  | 2.293045000  | 1.291017000  |
| 6  | 2.046854000  | 1.735221000  | -2.412090000 |
| 1  | 2.354222000  | 2.740719000  | -2.714689000 |
| 1  | 2.796979000  | 1.033633000  | -2.779662000 |

|    |              |              |              |
|----|--------------|--------------|--------------|
| 1  | 1.104104000  | 1.516486000  | -2.920081000 |
| 6  | 3.656181000  | -1.343718000 | -1.629623000 |
| 1  | 4.202961000  | -0.437184000 | -1.899022000 |
| 1  | 4.366036000  | -2.174965000 | -1.649782000 |
| 1  | 2.906798000  | -1.529585000 | -2.404480000 |
| 6  | 0.511694000  | 2.947212000  | -0.125991000 |
| 1  | -0.469291000 | 2.637764000  | -0.495102000 |
| 1  | 0.433501000  | 3.119982000  | 0.949850000  |
| 1  | 0.762870000  | 3.903785000  | -0.593099000 |
| 14 | -0.984577000 | 0.118369000  | 1.733612000  |
| 6  | -1.616507000 | 1.614250000  | 2.654482000  |
| 1  | -1.414524000 | 2.547961000  | 2.126844000  |
| 1  | -2.693479000 | 1.539820000  | 2.822039000  |
| 1  | -1.134503000 | 1.666298000  | 3.634717000  |
| 6  | -1.592218000 | -1.411149000 | 2.614995000  |
| 1  | -1.259733000 | -2.312262000 | 2.091798000  |
| 1  | -1.224850000 | -1.457220000 | 3.643151000  |
| 1  | -2.685150000 | -1.421844000 | 2.645871000  |
| 32 | -0.086600000 | -0.593101000 | -0.998267000 |
| 6  | -2.824779000 | -0.062907000 | -0.310237000 |
| 6  | -3.317621000 | -1.198720000 | -0.954088000 |
| 6  | -3.716092000 | 0.977008000  | -0.035366000 |
| 6  | -4.650651000 | -1.286724000 | -1.316572000 |
| 1  | -2.646741000 | -2.028708000 | -1.152694000 |
| 6  | -5.049607000 | 0.877899000  | -0.386721000 |
| 1  | -3.338470000 | 1.875874000  | 0.441228000  |
| 6  | -5.526078000 | -0.252396000 | -1.033046000 |
| 1  | -5.008612000 | -2.178962000 | -1.818166000 |
| 1  | -5.721464000 | 1.699733000  | -0.165418000 |
| 1  | -6.569570000 | -0.323921000 | -1.315365000 |
| 1  | -0.272436000 | -2.037896000 | -1.571099000 |
| 1  | -0.130245000 | -2.277784000 | -0.314365000 |

**5GeTS<sup>H-H</sup>** (T.E.= -3373.163675)

|    |              |              |              |
|----|--------------|--------------|--------------|
| 6  | -0.606013000 | 0.138125000  | 1.641190000  |
| 6  | -1.284934000 | 0.005557000  | 0.264250000  |
| 1  | -0.995999000 | 0.982358000  | 2.218648000  |
| 1  | -0.781657000 | -0.755765000 | 2.252860000  |
| 7  | 1.471039000  | -0.239118000 | 0.473317000  |
| 14 | -1.532136000 | 1.723805000  | -0.518326000 |

|    |              |              |              |
|----|--------------|--------------|--------------|
| 14 | -2.814188000 | -1.113166000 | 0.274656000  |
| 6  | 0.122358000  | 2.578307000  | -0.747412000 |
| 1  | 0.818649000  | 2.037080000  | -1.394419000 |
| 1  | -0.055982000 | 3.555232000  | -1.205873000 |
| 1  | 0.620476000  | 2.754046000  | 0.210050000  |
| 6  | -2.542566000 | 2.834173000  | 0.597678000  |
| 1  | -2.576696000 | 3.830235000  | 0.147454000  |
| 1  | -3.569595000 | 2.493915000  | 0.730934000  |
| 1  | -2.085771000 | 2.941930000  | 1.584035000  |
| 6  | -4.360729000 | -0.164322000 | 0.740118000  |
| 1  | -4.666413000 | 0.561188000  | -0.016347000 |
| 1  | -5.181581000 | -0.875690000 | 0.866794000  |
| 1  | -4.232745000 | 0.363235000  | 1.689201000  |
| 6  | -3.065787000 | -1.884385000 | -1.414298000 |
| 1  | -3.990137000 | -2.468397000 | -1.404446000 |
| 1  | -3.155318000 | -1.139058000 | -2.207535000 |
| 1  | -2.257397000 | -2.569832000 | -1.682862000 |
| 6  | -2.358774000 | 1.580023000  | -2.190847000 |
| 1  | -3.402409000 | 1.264665000  | -2.122850000 |
| 1  | -2.345524000 | 2.559817000  | -2.675693000 |
| 1  | -1.834112000 | 0.882360000  | -2.849269000 |
| 6  | -2.640981000 | -2.474441000 | 1.548340000  |
| 1  | -1.727578000 | -3.060912000 | 1.432395000  |
| 1  | -2.669862000 | -2.080926000 | 2.567123000  |
| 1  | -3.491782000 | -3.152668000 | 1.436946000  |
| 6  | 2.854720000  | -0.212190000 | 0.205024000  |
| 6  | 3.639812000  | 0.901391000  | 0.489134000  |
| 6  | 3.438372000  | -1.315463000 | -0.407896000 |
| 6  | 4.983677000  | 0.897821000  | 0.162324000  |
| 1  | 3.194379000  | 1.761811000  | 0.969449000  |
| 6  | 4.781664000  | -1.308481000 | -0.738186000 |
| 1  | 2.832223000  | -2.192906000 | -0.610712000 |
| 6  | 5.561781000  | -0.201260000 | -0.452530000 |
| 1  | 5.585321000  | 1.770863000  | 0.388018000  |
| 1  | 5.220266000  | -2.177120000 | -1.215614000 |
| 1  | 6.614757000  | -0.193921000 | -0.707421000 |
| 6  | 0.909741000  | 0.293005000  | 1.603242000  |
| 8  | 1.518984000  | 0.800453000  | 2.519804000  |
| 32 | 0.174926000  | -0.802680000 | -0.779937000 |
| 1  | 0.365252000  | -2.266103000 | -1.272625000 |

1 -0.023048000 -2.425606000 -0.031304000

**8GeTS<sup>H-H</sup>** (T.E.= -2940.803130)

6 0.547546000 1.729960000 0.129110000  
6 -0.961274000 1.737207000 -0.097606000  
6 -1.558424000 0.414190000 0.366322000  
1 1.013289000 2.532408000 -0.453919000  
1 0.755582000 1.924852000 1.196559000  
1 -1.147396000 1.925453000 -1.167364000  
1 -1.380955000 2.591996000 0.447449000  
32 -0.154409000 -0.845110000 0.310258000  
7 1.089121000 0.441021000 -0.258539000  
6 2.452276000 0.231724000 -0.187888000  
6 2.979491000 -1.035286000 -0.480715000  
6 3.358045000 1.244231000 0.151704000  
6 4.336370000 -1.272899000 -0.440019000  
1 2.297574000 -1.833428000 -0.760377000  
6 4.720482000 0.994646000 0.181970000  
1 2.998523000 2.234819000 0.398386000  
6 5.225805000 -0.258896000 -0.109879000  
1 4.707251000 -2.264810000 -0.674700000  
1 5.395345000 1.801500000 0.447376000  
1 6.292212000 -0.446793000 -0.081020000  
1 0.419548000 -1.877275000 1.311673000  
1 0.543799000 -0.768901000 2.074129000  
15 -3.126443000 0.003381000 -0.072313000  
6 -3.512565000 -0.148700000 -1.843582000  
1 -4.575140000 -0.331046000 -2.017799000  
1 -3.222836000 0.774054000 -2.350585000  
1 -2.928173000 -0.969729000 -2.263292000  
6 -4.318496000 1.237556000 0.486775000  
1 -5.332105000 0.968385000 0.184859000  
1 -4.263968000 1.328468000 1.571543000  
1 -4.063922000 2.201800000 0.042288000  
6 -3.624287000 -1.572498000 0.632971000  
1 -2.959918000 -2.359247000 0.269680000  
1 -3.556957000 -1.525866000 1.719556000  
1 -4.647699000 -1.808381000 0.336783000

**9GeTS<sup>H-H</sup>** (T.E.= -2940.584042)

|    |              |              |              |
|----|--------------|--------------|--------------|
| 6  | -0.454401000 | 1.659359000  | -0.110415000 |
| 6  | 0.880998000  | 1.681426000  | 0.060509000  |
| 6  | 1.549036000  | 0.444372000  | 0.434508000  |
| 7  | -1.099233000 | 0.429080000  | 0.032308000  |
| 15 | 3.119781000  | 0.091653000  | -0.073352000 |
| 6  | 3.360763000  | 0.106901000  | -1.864667000 |
| 1  | 3.166624000  | 1.115788000  | -2.234244000 |
| 1  | 4.372340000  | -0.193738000 | -2.142802000 |
| 1  | 2.632095000  | -0.572014000 | -2.315298000 |
| 6  | 3.604232000  | -1.550923000 | 0.464362000  |
| 1  | 4.642136000  | -1.745827000 | 0.191169000  |
| 1  | 3.486001000  | -1.637409000 | 1.544452000  |
| 1  | 2.967070000  | -2.287872000 | -0.030411000 |
| 6  | 4.337029000  | 1.260391000  | 0.554270000  |
| 1  | 4.366288000  | 1.206530000  | 1.642426000  |
| 1  | 5.326227000  | 1.051963000  | 0.143161000  |
| 1  | 4.037185000  | 2.268491000  | 0.261995000  |
| 32 | 0.190857000  | -0.867472000 | 0.404406000  |
| 6  | -2.470568000 | 0.256303000  | -0.034825000 |
| 6  | -3.368486000 | 1.307105000  | 0.178477000  |
| 6  | -2.993547000 | -1.008837000 | -0.320714000 |
| 6  | -4.731744000 | 1.090370000  | 0.107214000  |
| 1  | -2.995259000 | 2.293671000  | 0.424778000  |
| 6  | -4.357754000 | -1.216008000 | -0.377092000 |
| 1  | -2.312645000 | -1.829907000 | -0.523853000 |
| 6  | -5.241462000 | -0.169021000 | -0.166365000 |
| 1  | -5.407158000 | 1.921004000  | 0.280823000  |
| 1  | -4.734256000 | -2.207706000 | -0.602222000 |
| 1  | -6.311205000 | -0.331677000 | -0.216372000 |
| 1  | -1.047415000 | 2.529605000  | -0.355820000 |
| 1  | 1.429904000  | 2.613087000  | -0.038350000 |
| 1  | 0.068510000  | -2.278660000 | -0.202782000 |
| 1  | 0.419470000  | -1.703219000 | -1.445091000 |

**14GeTS<sup>H-H</sup>** (T.E.= -3134.759421)

|    |              |              |              |
|----|--------------|--------------|--------------|
| 6  | -1.672499000 | -0.146826000 | -0.108534000 |
| 32 | -0.271241000 | -1.407146000 | 0.050702000  |
| 7  | 1.051177000  | -0.088726000 | 0.112246000  |
| 6  | 2.395246000  | -0.453205000 | -0.050785000 |



|    |              |              |              |
|----|--------------|--------------|--------------|
| 6  | 3.169765000  | 0.099300000  | -1.070860000 |
| 6  | 2.977625000  | -1.403206000 | 0.785516000  |
| 6  | 4.491904000  | -0.271008000 | -1.229474000 |
| 1  | 2.716177000  | 0.826748000  | -1.736033000 |
| 6  | 4.299480000  | -1.778498000 | 0.616906000  |
| 1  | 2.385015000  | -1.824911000 | 1.592129000  |
| 6  | 5.065975000  | -1.211550000 | -0.387298000 |
| 1  | 5.078439000  | 0.172770000  | -2.026181000 |
| 1  | 4.734943000  | -2.515096000 | 1.282780000  |
| 1  | 6.101566000  | -1.502675000 | -0.516738000 |
| 1  | -0.107946000 | -2.654358000 | 0.955939000  |
| 1  | -0.379227000 | -1.786085000 | 1.912028000  |
| 15 | -3.361336000 | -0.372880000 | -0.100780000 |
| 6  | -4.210660000 | 0.250396000  | -1.558608000 |
| 1  | -5.286946000 | 0.091041000  | -1.469430000 |
| 1  | -3.997398000 | 1.315712000  | -1.645183000 |
| 1  | -3.834393000 | -0.263354000 | -2.443511000 |
| 6  | -4.177713000 | 0.400043000  | 1.304221000  |
| 1  | -5.256518000 | 0.239530000  | 1.258873000  |
| 1  | -3.778487000 | -0.029719000 | 2.223969000  |
| 1  | -3.959762000 | 1.467561000  | 1.284026000  |
| 6  | -3.738744000 | -2.126160000 | 0.008305000  |
| 1  | -3.310437000 | -2.652193000 | -0.846120000 |
| 1  | -3.311605000 | -2.530945000 | 0.928209000  |
| 1  | -4.819059000 | -2.278045000 | 0.019448000  |
| 5  | 0.459800000  | 1.229159000  | 0.087853000  |
| 6  | -1.151387000 | 1.182045000  | -0.124656000 |
| 8  | -1.897679000 | 2.173352000  | -0.248815000 |
| 7  | 1.165695000  | 2.426808000  | 0.323743000  |
| 6  | 0.626782000  | 3.740144000  | 0.039997000  |
| 1  | 0.592491000  | 4.350124000  | 0.951262000  |
| 1  | 1.268614000  | 4.266157000  | -0.678576000 |
| 1  | -0.380302000 | 3.657418000  | -0.360951000 |
| 6  | 2.497188000  | 2.508899000  | 0.876061000  |
| 1  | 2.818336000  | 1.559270000  | 1.299427000  |
| 1  | 3.237738000  | 2.812416000  | 0.123837000  |
| 1  | 2.515080000  | 3.259090000  | 1.674644000  |

Cartesian coordinates of the intermediates involved in the activation of N – H bond of NH<sub>3</sub> by CAASis (**1Si-5Si**, **8Si-9Si** and **14Si**), CAAGes (**1Ge-5Ge**, **8Ge-9Ge** and **14Ge**) and NacNacSi (**IIa**), along with their total energies (in hartrees) including zero point vibrational correction.

**1SiInt<sup>N-H</sup>** (T.E.= -1567.044271)

|    |              |              |              |
|----|--------------|--------------|--------------|
| 6  | -0.917348000 | -0.398974000 | -1.589565000 |
| 6  | 0.535800000  | 0.016472000  | -1.657411000 |
| 6  | 1.145499000  | 0.032785000  | -0.227167000 |
| 1  | -1.456606000 | -0.091262000 | -2.493409000 |
| 1  | -0.999828000 | -1.503105000 | -1.547784000 |
| 1  | 0.569318000  | 1.017044000  | -2.106085000 |
| 1  | 1.087701000  | -0.631363000 | -2.350159000 |
| 7  | -1.483097000 | 0.229668000  | -0.411717000 |
| 14 | -0.351474000 | 0.202796000  | 0.994721000  |
| 14 | 2.268813000  | -1.431934000 | 0.065388000  |
| 14 | 2.039764000  | 1.687391000  | -0.023042000 |
| 6  | 3.021919000  | 1.795716000  | 1.569830000  |
| 1  | 3.883639000  | 1.123567000  | 1.561332000  |
| 1  | 3.399894000  | 2.814522000  | 1.691525000  |
| 1  | 2.409860000  | 1.557879000  | 2.443178000  |
| 6  | 0.794306000  | 3.096807000  | -0.041126000 |
| 1  | 0.125943000  | 3.075502000  | 0.823181000  |
| 1  | 1.336566000  | 4.046757000  | -0.021501000 |
| 1  | 0.176191000  | 3.085729000  | -0.942100000 |
| 6  | 3.215207000  | 2.027077000  | -1.450325000 |
| 1  | 3.481555000  | 3.087786000  | -1.439988000 |
| 1  | 4.139325000  | 1.452398000  | -1.375955000 |
| 1  | 2.763041000  | 1.812173000  | -2.421336000 |
| 6  | 2.643002000  | -1.712505000 | 1.886077000  |
| 1  | 3.114847000  | -2.691011000 | 2.013091000  |
| 1  | 3.336918000  | -0.961139000 | 2.267880000  |
| 1  | 1.759934000  | -1.679907000 | 2.528446000  |
| 6  | 1.533055000  | -3.028741000 | -0.624030000 |
| 1  | 0.716253000  | -3.449786000 | -0.034171000 |
| 1  | 1.177899000  | -2.906466000 | -1.650368000 |
| 1  | 2.323621000  | -3.784375000 | -0.644567000 |
| 6  | 3.920236000  | -1.274256000 | -0.815713000 |
| 1  | 4.555944000  | -0.503375000 | -0.374012000 |
| 1  | 4.457015000  | -2.224886000 | -0.750685000 |
| 1  | 3.790439000  | -1.036563000 | -1.874948000 |

|   |              |              |              |
|---|--------------|--------------|--------------|
| 6 | -2.858979000 | 0.186775000  | -0.240593000 |
| 6 | -3.702414000 | -0.570127000 | -1.063569000 |
| 6 | -3.456670000 | 0.916402000  | 0.800099000  |
| 6 | -5.072477000 | -0.593608000 | -0.848928000 |
| 1 | -3.289342000 | -1.146735000 | -1.882046000 |
| 6 | -4.818884000 | 0.877588000  | 1.008026000  |
| 1 | -2.824611000 | 1.530018000  | 1.433607000  |
| 6 | -5.644819000 | 0.120730000  | 0.186431000  |
| 1 | -5.697117000 | -1.187224000 | -1.507969000 |
| 1 | -5.246178000 | 1.459282000  | 1.817642000  |
| 1 | -6.715685000 | 0.099095000  | 0.348079000  |
| 7 | -0.899709000 | -1.834532000 | 1.325986000  |
| 1 | -1.806080000 | -1.763458000 | 1.780790000  |
| 1 | -1.025721000 | -2.389044000 | 0.482538000  |
| 1 | -0.289118000 | -2.346374000 | 1.954734000  |

**2SiInt<sup>N-H</sup>** (T.E.= -1565.858236)

|    |              |              |              |
|----|--------------|--------------|--------------|
| 6  | -1.152884000 | -0.031200000 | -0.196675000 |
| 6  | -0.509047000 | -0.009394000 | -1.552711000 |
| 6  | 0.823929000  | -0.133153000 | -1.573546000 |
| 1  | -1.073623000 | 0.141564000  | -2.469287000 |
| 1  | 1.421767000  | -0.090718000 | -2.478110000 |
| 14 | 0.239390000  | -0.698108000 | 0.974191000  |
| 7  | 1.452700000  | -0.359145000 | -0.352640000 |
| 14 | -2.789675000 | -0.942484000 | -0.148809000 |
| 14 | -1.302964000 | 1.798836000  | 0.307944000  |
| 6  | -4.209107000 | 0.049831000  | -0.872947000 |
| 1  | -5.103343000 | -0.579078000 | -0.903305000 |
| 1  | -4.447954000 | 0.941768000  | -0.290784000 |
| 1  | -3.988792000 | 0.363514000  | -1.897064000 |
| 6  | -3.255130000 | -1.448030000 | 1.596099000  |
| 1  | -4.212792000 | -1.975989000 | 1.580124000  |
| 1  | -2.515934000 | -2.115729000 | 2.046421000  |
| 1  | -3.358799000 | -0.587208000 | 2.259088000  |
| 6  | -2.731766000 | -2.506703000 | -1.201679000 |
| 1  | -3.757299000 | -2.823420000 | -1.409608000 |
| 1  | -2.242652000 | -2.332558000 | -2.163646000 |
| 1  | -2.238881000 | -3.351620000 | -0.716231000 |
| 6  | -2.260881000 | 2.012244000  | 1.906873000  |
| 1  | -2.250932000 | 3.069264000  | 2.187284000  |

|   |              |              |              |
|---|--------------|--------------|--------------|
| 1 | -3.304541000 | 1.700981000  | 1.827809000  |
| 1 | -1.795956000 | 1.447150000  | 2.719111000  |
| 6 | 0.378593000  | 2.593759000  | 0.575191000  |
| 1 | 0.939302000  | 2.157593000  | 1.405519000  |
| 1 | 1.001124000  | 2.544578000  | -0.321505000 |
| 1 | 0.214148000  | 3.650826000  | 0.806819000  |
| 6 | -2.117459000 | 2.816962000  | -1.041424000 |
| 1 | -3.145633000 | 2.522102000  | -1.253597000 |
| 1 | -2.126295000 | 3.864957000  | -0.728078000 |
| 1 | -1.544979000 | 2.756624000  | -1.970020000 |
| 6 | 2.825035000  | -0.216367000 | -0.196344000 |
| 6 | 3.463758000  | -0.781321000 | 0.914892000  |
| 6 | 3.615813000  | 0.490165000  | -1.109172000 |
| 6 | 4.826892000  | -0.655328000 | 1.094351000  |
| 1 | 2.868563000  | -1.312122000 | 1.651757000  |
| 6 | 4.982906000  | 0.598519000  | -0.926699000 |
| 1 | 3.152546000  | 0.982040000  | -1.956201000 |
| 6 | 5.604094000  | 0.027446000  | 0.171105000  |
| 1 | 5.288920000  | -1.102981000 | 1.967575000  |
| 1 | 5.568215000  | 1.153194000  | -1.652054000 |
| 1 | 6.674243000  | 0.119914000  | 0.310324000  |
| 7 | 0.196230000  | -2.667512000 | 0.290895000  |
| 1 | 1.124847000  | -3.049958000 | 0.444280000  |
| 1 | -0.467779000 | -3.277610000 | 0.756290000  |
| 1 | 0.017006000  | -2.690473000 | -0.711153000 |

**3SiInt<sup>N-H</sup>** (T.E.= -1687.144782)

|    |              |              |              |
|----|--------------|--------------|--------------|
| 6  | 0.743155000  | 1.195556000  | 0.789183000  |
| 6  | 1.386897000  | 0.014438000  | 0.008733000  |
| 1  | 1.012834000  | 1.179227000  | 1.854179000  |
| 1  | 1.135042000  | 2.165090000  | 0.446559000  |
| 14 | 0.065254000  | -0.591634000 | -1.272558000 |
| 7  | -1.282135000 | 0.186274000  | -0.341419000 |
| 5  | -0.835333000 | 1.200582000  | 0.580576000  |
| 7  | -1.651416000 | 2.205737000  | 1.163795000  |
| 6  | -1.171054000 | 3.097282000  | 2.191721000  |
| 1  | -1.149549000 | 4.137908000  | 1.841733000  |
| 1  | -1.826705000 | 3.067537000  | 3.071351000  |
| 1  | -0.168219000 | 2.825450000  | 2.514672000  |
| 6  | -3.004717000 | 2.527530000  | 0.779594000  |

|    |              |              |              |
|----|--------------|--------------|--------------|
| 1  | -3.092448000 | 3.605373000  | 0.595780000  |
| 1  | -3.296935000 | 2.006219000  | -0.129656000 |
| 1  | -3.729584000 | 2.270595000  | 1.563436000  |
| 14 | 1.523423000  | -1.466401000 | 1.181278000  |
| 14 | 3.046171000  | 0.451517000  | -0.740966000 |
| 6  | -0.170047000 | -2.118465000 | 1.674958000  |
| 1  | -0.762817000 | -2.483545000 | 0.832328000  |
| 1  | -0.030422000 | -2.948779000 | 2.373955000  |
| 1  | -0.758978000 | -1.350162000 | 2.183885000  |
| 6  | 2.336055000  | -1.023046000 | 2.818759000  |
| 1  | 2.363672000  | -1.929522000 | 3.431241000  |
| 1  | 3.357303000  | -0.654911000 | 2.720895000  |
| 1  | 1.757043000  | -0.279626000 | 3.371617000  |
| 6  | 4.453032000  | 0.493119000  | 0.504727000  |
| 1  | 4.704800000  | -0.490033000 | 0.906664000  |
| 1  | 5.348714000  | 0.895364000  | 0.022790000  |
| 1  | 4.204447000  | 1.148636000  | 1.344463000  |
| 6  | 3.530411000  | -0.701301000 | -2.141870000 |
| 1  | 4.484851000  | -0.376298000 | -2.566095000 |
| 1  | 3.645806000  | -1.734054000 | -1.809702000 |
| 1  | 2.791260000  | -0.704598000 | -2.947599000 |
| 6  | 2.467114000  | -2.907545000 | 0.437261000  |
| 1  | 3.533339000  | -2.704090000 | 0.314595000  |
| 1  | 2.372470000  | -3.767515000 | 1.106437000  |
| 1  | 2.058255000  | -3.194797000 | -0.534594000 |
| 6  | 3.087064000  | 2.197920000  | -1.466830000 |
| 1  | 2.470595000  | 2.355856000  | -2.354042000 |
| 1  | 2.824990000  | 2.963039000  | -0.732236000 |
| 1  | 4.120525000  | 2.390734000  | -1.769946000 |
| 6  | -2.580661000 | -0.331436000 | -0.442641000 |
| 6  | -3.323828000 | -0.634906000 | 0.700983000  |
| 6  | -3.161995000 | -0.603083000 | -1.682226000 |
| 6  | -4.600073000 | -1.154967000 | 0.606182000  |
| 1  | -2.880304000 | -0.455045000 | 1.674752000  |
| 6  | -4.437451000 | -1.133513000 | -1.775097000 |
| 1  | -2.601634000 | -0.393335000 | -2.587572000 |
| 6  | -5.169785000 | -1.406533000 | -0.632835000 |
| 1  | -5.152744000 | -1.377387000 | 1.512365000  |
| 1  | -4.862452000 | -1.329979000 | -2.753235000 |
| 1  | -6.169654000 | -1.817423000 | -0.705605000 |

|   |              |             |              |
|---|--------------|-------------|--------------|
| 7 | 0.184090000  | 1.079974000 | -2.533187000 |
| 1 | -0.715540000 | 1.159752000 | -2.997172000 |
| 1 | 0.891265000  | 0.983886000 | -3.255268000 |
| 1 | 0.351071000  | 1.954576000 | -2.040337000 |

**4SiInt<sup>N-H</sup>** (T.E.= -1897.053880)

|    |              |              |              |
|----|--------------|--------------|--------------|
| 6  | -0.903131000 | -0.348673000 | 1.534840000  |
| 6  | -1.354233000 | 0.036067000  | 0.083641000  |
| 1  | -1.104693000 | 0.459873000  | 2.249222000  |
| 1  | -1.458016000 | -1.206925000 | 1.934220000  |
| 14 | 0.130395000  | 0.195217000  | -1.180470000 |
| 7  | 1.411341000  | -0.063520000 | 0.038814000  |
| 14 | -1.959507000 | 1.830341000  | 0.163697000  |
| 14 | -2.705836000 | -1.126070000 | -0.489221000 |
| 6  | -0.515319000 | 2.990120000  | 0.500850000  |
| 1  | 0.163707000  | 3.061657000  | -0.352123000 |
| 1  | -0.908667000 | 3.992181000  | 0.695907000  |
| 1  | 0.068727000  | 2.687979000  | 1.374462000  |
| 6  | -3.169863000 | 2.139459000  | 1.570815000  |
| 1  | -3.396615000 | 3.210033000  | 1.579824000  |
| 1  | -4.111605000 | 1.601516000  | 1.455430000  |
| 1  | -2.756260000 | 1.888482000  | 2.549861000  |
| 6  | -4.309907000 | -0.917569000 | 0.467300000  |
| 1  | -4.827414000 | 0.007775000  | 0.206647000  |
| 1  | -4.980043000 | -1.749424000 | 0.233506000  |
| 1  | -4.141680000 | -0.917060000 | 1.547505000  |
| 6  | -3.122122000 | -0.945078000 | -2.314011000 |
| 1  | -3.713143000 | -1.806859000 | -2.637247000 |
| 1  | -3.716357000 | -0.048670000 | -2.500316000 |
| 1  | -2.240990000 | -0.878942000 | -2.957069000 |
| 6  | -2.793251000 | 2.415532000  | -1.411822000 |
| 1  | -3.785234000 | 1.975976000  | -1.541611000 |
| 1  | -2.920811000 | 3.500651000  | -1.359316000 |
| 1  | -2.197170000 | 2.188408000  | -2.298379000 |
| 6  | -2.228893000 | -2.936065000 | -0.214486000 |
| 1  | -1.609442000 | -3.349538000 | -1.013244000 |
| 1  | -1.719082000 | -3.110642000 | 0.736280000  |
| 1  | -3.145988000 | -3.531432000 | -0.199116000 |
| 14 | 0.940513000  | -0.695102000 | 1.583325000  |
| 6  | 1.245056000  | -2.536762000 | 1.814181000  |

|   |              |              |              |
|---|--------------|--------------|--------------|
| 1 | 0.835712000  | -3.143173000 | 1.000683000  |
| 1 | 2.309137000  | -2.767734000 | 1.902772000  |
| 1 | 0.760308000  | -2.871317000 | 2.736363000  |
| 6 | 1.845125000  | 0.203232000  | 2.947276000  |
| 1 | 1.689611000  | 1.281924000  | 2.864014000  |
| 1 | 1.501612000  | -0.118153000 | 3.933341000  |
| 1 | 2.920372000  | 0.014813000  | 2.890316000  |
| 6 | 2.756182000  | 0.151629000  | -0.309137000 |
| 6 | 3.697562000  | -0.878967000 | -0.258146000 |
| 6 | 3.189595000  | 1.411979000  | -0.723943000 |
| 6 | 5.022469000  | -0.652827000 | -0.594913000 |
| 1 | 3.376310000  | -1.871433000 | 0.045057000  |
| 6 | 4.509762000  | 1.631843000  | -1.070313000 |
| 1 | 2.468248000  | 2.221050000  | -0.760071000 |
| 6 | 5.436581000  | 0.602353000  | -1.005537000 |
| 1 | 5.734024000  | -1.469524000 | -0.542023000 |
| 1 | 4.820177000  | 2.621403000  | -1.387072000 |
| 1 | 6.471750000  | 0.778409000  | -1.272773000 |
| 7 | 0.390937000  | -1.827388000 | -1.820192000 |
| 1 | -0.212905000 | -2.139893000 | -2.574620000 |
| 1 | 1.342019000  | -1.817068000 | -2.179773000 |
| 1 | 0.356853000  | -2.517016000 | -1.073209000 |

**5SiInt<sup>N-H</sup>** (T.E.= -1641.116260)

|    |              |              |              |
|----|--------------|--------------|--------------|
| 6  | 0.576199000  | -0.163737000 | 1.568805000  |
| 6  | 1.208568000  | -0.048933000 | 0.171108000  |
| 1  | 0.720550000  | -1.154749000 | 2.020029000  |
| 1  | 0.989498000  | 0.529186000  | 2.310090000  |
| 14 | -0.237339000 | -0.286854000 | -1.092466000 |
| 7  | -1.418706000 | -0.001705000 | 0.264203000  |
| 14 | 2.647848000  | -1.223471000 | -0.090731000 |
| 14 | 1.711680000  | 1.767007000  | -0.092016000 |
| 6  | 2.283815000  | -2.952218000 | 0.583641000  |
| 1  | 1.720114000  | -3.573525000 | -0.116204000 |
| 1  | 3.241169000  | -3.457959000 | 0.736152000  |
| 1  | 1.767576000  | -2.960926000 | 1.546333000  |
| 6  | 4.208746000  | -0.682335000 | 0.798530000  |
| 1  | 4.965933000  | -1.465648000 | 0.704743000  |
| 1  | 4.631639000  | 0.238657000  | 0.391920000  |
| 1  | 4.022053000  | -0.525759000 | 1.864786000  |

|   |              |              |              |
|---|--------------|--------------|--------------|
| 6 | 2.702761000  | 2.430133000  | 1.357665000  |
| 1 | 3.606486000  | 1.857179000  | 1.567788000  |
| 1 | 3.003059000  | 3.454495000  | 1.118095000  |
| 1 | 2.106267000  | 2.476239000  | 2.271493000  |
| 6 | 2.708675000  | 2.020322000  | -1.658677000 |
| 1 | 2.837657000  | 3.095371000  | -1.813488000 |
| 1 | 3.704940000  | 1.575888000  | -1.606324000 |
| 1 | 2.197925000  | 1.616860000  | -2.536434000 |
| 6 | 3.049772000  | -1.459694000 | -1.908388000 |
| 1 | 3.443223000  | -0.554642000 | -2.373030000 |
| 1 | 3.809344000  | -2.240893000 | -2.004850000 |
| 1 | 2.178844000  | -1.771580000 | -2.492157000 |
| 6 | 0.208085000  | 2.887587000  | -0.210647000 |
| 1 | -0.386249000 | 2.701864000  | -1.108437000 |
| 1 | -0.449656000 | 2.800481000  | 0.657658000  |
| 1 | 0.560025000  | 3.922623000  | -0.257559000 |
| 6 | -2.815587000 | 0.016836000  | 0.038151000  |
| 6 | -3.652722000 | -0.894127000 | 0.675751000  |
| 6 | -3.359584000 | 0.910688000  | -0.876155000 |
| 6 | -5.008664000 | -0.905998000 | 0.402028000  |
| 1 | -3.231462000 | -1.583695000 | 1.398542000  |
| 6 | -4.716238000 | 0.892646000  | -1.149959000 |
| 1 | -2.706384000 | 1.620791000  | -1.370753000 |
| 6 | -5.546047000 | -0.014314000 | -0.512350000 |
| 1 | -5.650430000 | -1.618010000 | 0.908278000  |
| 1 | -5.126837000 | 1.596028000  | -1.865190000 |
| 1 | -6.608321000 | -0.025812000 | -0.725938000 |
| 6 | -0.924373000 | 0.047950000  | 1.543514000  |
| 8 | -1.580743000 | 0.220173000  | 2.549043000  |
| 7 | -0.572037000 | -2.334129000 | -0.863182000 |
| 1 | -0.105921000 | -2.899047000 | -1.566609000 |
| 1 | -0.337172000 | -2.711286000 | 0.052559000  |
| 1 | -1.573812000 | -2.455069000 | -0.996091000 |

**8SiInt<sup>N-H</sup>** (T.E.= -1209.726611)

|   |              |             |              |
|---|--------------|-------------|--------------|
| 6 | 0.409002000  | 1.643624000 | 0.221310000  |
| 6 | -1.070782000 | 1.698391000 | -0.116077000 |
| 6 | -1.556414000 | 0.263203000 | -0.150760000 |
| 1 | 0.935829000  | 2.534192000 | -0.142329000 |
| 1 | 0.534435000  | 1.619752000 | 1.317854000  |



|    |              |              |              |
|----|--------------|--------------|--------------|
| 1  | -1.205806000 | 2.189927000  | -1.090976000 |
| 1  | -1.589335000 | 2.328754000  | 0.619617000  |
| 14 | -0.223445000 | -0.918018000 | -0.424325000 |
| 7  | 0.958891000  | 0.435480000  | -0.372467000 |
| 15 | -3.196750000 | -0.090024000 | -0.100307000 |
| 6  | -4.030618000 | 0.389513000  | 1.435220000  |
| 1  | -3.860638000 | 1.453220000  | 1.613262000  |
| 1  | -5.105622000 | 0.205369000  | 1.383606000  |
| 1  | -3.599293000 | -0.172954000 | 2.263917000  |
| 6  | -4.190759000 | 0.746835000  | -1.362835000 |
| 1  | -3.836561000 | 0.452216000  | -2.351351000 |
| 1  | -5.250664000 | 0.505100000  | -1.262981000 |
| 1  | -4.063605000 | 1.826259000  | -1.256088000 |
| 6  | -3.537811000 | -1.844704000 | -0.292139000 |
| 1  | -3.178983000 | -2.190887000 | -1.261481000 |
| 1  | -3.029611000 | -2.406976000 | 0.491638000  |
| 1  | -4.613387000 | -2.014325000 | -0.219621000 |
| 6  | 2.328636000  | 0.252501000  | -0.330199000 |
| 6  | 3.188755000  | 1.108136000  | 0.372188000  |
| 6  | 2.915036000  | -0.832467000 | -1.003943000 |
| 6  | 4.555210000  | 0.876455000  | 0.406187000  |
| 1  | 2.788724000  | 1.960856000  | 0.906440000  |
| 6  | 4.274189000  | -1.056270000 | -0.956153000 |
| 1  | 2.276118000  | -1.496681000 | -1.576059000 |
| 6  | 5.114202000  | -0.204794000 | -0.249228000 |
| 1  | 5.189347000  | 1.560251000  | 0.960834000  |
| 1  | 4.688275000  | -1.904281000 | -1.491259000 |
| 1  | 6.183039000  | -0.378850000 | -0.220757000 |
| 7  | 0.994117000  | -1.297316000 | 2.273123000  |
| 1  | 1.833632000  | -1.721873000 | 1.895391000  |
| 1  | 0.640170000  | -1.917266000 | 2.990703000  |
| 1  | 1.280490000  | -0.438873000 | 2.728769000  |

**9SiInt<sup>N-H</sup>** (T.E.= -1208.554177)

|    |              |              |              |
|----|--------------|--------------|--------------|
| 6  | 0.515383000  | 0.530845000  | 1.441555000  |
| 6  | -0.838438000 | 0.514328000  | 1.435448000  |
| 6  | -1.393145000 | -0.245717000 | 0.347718000  |
| 14 | -0.080745000 | -0.973167000 | -0.692020000 |
| 7  | 1.099650000  | -0.202258000 | 0.424739000  |
| 15 | -3.067648000 | -0.277971000 | 0.037772000  |

|   |              |              |              |
|---|--------------|--------------|--------------|
| 6 | -4.022617000 | -1.255510000 | 1.216641000  |
| 1 | -3.841283000 | -0.867646000 | 2.220814000  |
| 1 | -5.090864000 | -1.204602000 | 0.997534000  |
| 1 | -3.686457000 | -2.292217000 | 1.179211000  |
| 6 | -3.418887000 | -0.966910000 | -1.581472000 |
| 1 | -4.497559000 | -1.049636000 | -1.722006000 |
| 1 | -2.999620000 | -0.315073000 | -2.348901000 |
| 1 | -2.963877000 | -1.954262000 | -1.669340000 |
| 6 | -3.820775000 | 1.355994000  | 0.079173000  |
| 1 | -3.289006000 | 2.000592000  | -0.625870000 |
| 1 | -4.881554000 | 1.300025000  | -0.171374000 |
| 1 | -3.712755000 | 1.773053000  | 1.082167000  |
| 6 | 2.488686000  | -0.166090000 | 0.223237000  |
| 6 | 3.158238000  | -1.304883000 | -0.220413000 |
| 6 | 3.222906000  | 1.000225000  | 0.432952000  |
| 6 | 4.520211000  | -1.273665000 | -0.454357000 |
| 1 | 2.593811000  | -2.219331000 | -0.368143000 |
| 6 | 4.588360000  | 1.020100000  | 0.211958000  |
| 1 | 2.709102000  | 1.902089000  | 0.747201000  |
| 6 | 5.246636000  | -0.113829000 | -0.234831000 |
| 1 | 5.021601000  | -2.171241000 | -0.798711000 |
| 1 | 5.141016000  | 1.938000000  | 0.379441000  |
| 1 | 6.315655000  | -0.094224000 | -0.410056000 |
| 1 | 1.140168000  | 1.014210000  | 2.183326000  |
| 1 | -1.418529000 | 1.020911000  | 2.201860000  |
| 7 | -0.970505000 | 2.605259000  | -1.422854000 |
| 1 | -0.600022000 | 1.996596000  | -2.144057000 |
| 1 | -0.442947000 | 3.468634000  | -1.470456000 |
| 1 | -0.735105000 | 2.157696000  | -0.539785000 |

**14SiInt<sup>N-H</sup>** (T.E.= -1403.894695)

|   |              |              |              |
|---|--------------|--------------|--------------|
| 6 | 1.208790000  | 1.097724000  | 0.168912000  |
| 6 | 1.632082000  | -0.257602000 | -0.014638000 |
| 7 | -0.954381000 | -0.091344000 | -0.314465000 |
| 6 | -2.296173000 | -0.461480000 | -0.182260000 |
| 6 | -3.034886000 | -0.082685000 | 0.943034000  |
| 6 | -4.352780000 | -0.473253000 | 1.097416000  |
| 6 | -4.965160000 | -1.272179000 | 0.144306000  |
| 6 | -4.238715000 | -1.671971000 | -0.965775000 |
| 6 | -2.923024000 | -1.273994000 | -1.130087000 |

|    |              |              |              |
|----|--------------|--------------|--------------|
| 1  | -2.554627000 | 0.538036000  | 1.694041000  |
| 1  | -4.904641000 | -0.155284000 | 1.975281000  |
| 1  | -5.997136000 | -1.579312000 | 0.265571000  |
| 1  | -4.704208000 | -2.294713000 | -1.721916000 |
| 1  | -2.361800000 | -1.575686000 | -2.007842000 |
| 5  | -0.384650000 | 1.209022000  | -0.075565000 |
| 7  | -1.079119000 | 2.437880000  | -0.162537000 |
| 6  | -0.524075000 | 3.693210000  | 0.292459000  |
| 1  | -0.485877000 | 4.421644000  | -0.527583000 |
| 1  | -1.153564000 | 4.127366000  | 1.081014000  |
| 1  | 0.485072000  | 3.543444000  | 0.670631000  |
| 6  | -2.405877000 | 2.602809000  | -0.702585000 |
| 1  | -3.146555000 | 2.823065000  | 0.078978000  |
| 1  | -2.415873000 | 3.443393000  | -1.406617000 |
| 1  | -2.735114000 | 1.713835000  | -1.237432000 |
| 15 | 3.317963000  | -0.495595000 | -0.086702000 |
| 6  | 4.191675000  | -0.093423000 | 1.439106000  |
| 1  | 5.267726000  | -0.232683000 | 1.317095000  |
| 1  | 3.974313000  | 0.945868000  | 1.685223000  |
| 1  | 3.829278000  | -0.736145000 | 2.242387000  |
| 6  | 4.164782000  | 0.454742000  | -1.364029000 |
| 1  | 5.243948000  | 0.297095000  | -1.317075000 |
| 1  | 3.790649000  | 0.148444000  | -2.341613000 |
| 1  | 3.934500000  | 1.508291000  | -1.205603000 |
| 6  | 3.716293000  | -2.217981000 | -0.424328000 |
| 1  | 3.305396000  | -2.852701000 | 0.362797000  |
| 1  | 3.275993000  | -2.518803000 | -1.375732000 |
| 1  | 4.798772000  | -2.350945000 | -0.464864000 |
| 8  | 1.992295000  | 2.043794000  | 0.398163000  |
| 14 | 0.268130000  | -1.427857000 | -0.512547000 |
| 7  | -0.156960000 | -2.059550000 | 1.441893000  |
| 1  | -0.100680000 | -1.248450000 | 2.054187000  |
| 1  | -1.091529000 | -2.453448000 | 1.514013000  |
| 1  | 0.503210000  | -2.756255000 | 1.770336000  |

**1GeInt<sup>N-H</sup> (T.E.= -3354.527709)**

|   |              |             |             |
|---|--------------|-------------|-------------|
| 6 | -0.888441000 | 0.424249000 | 1.672830000 |
| 6 | 0.582508000  | 0.060239000 | 1.731999000 |
| 6 | 1.208455000  | 0.073268000 | 0.323530000 |
| 1 | -1.393646000 | 0.107279000 | 2.595920000 |

|    |              |              |              |
|----|--------------|--------------|--------------|
| 1  | -1.009067000 | 1.520014000  | 1.628011000  |
| 1  | 0.669849000  | -0.939473000 | 2.177156000  |
| 1  | 1.101288000  | 0.732189000  | 2.429141000  |
| 32 | -0.237966000 | -0.702280000 | -0.881552000 |
| 7  | -1.477285000 | -0.220515000 | 0.518696000  |
| 14 | 1.369340000  | 1.834534000  | -0.355063000 |
| 14 | 2.834222000  | -0.855075000 | 0.275348000  |
| 6  | 2.861063000  | -2.307959000 | 1.477591000  |
| 1  | 2.083157000  | -3.059506000 | 1.328927000  |
| 1  | 3.823632000  | -2.814632000 | 1.358917000  |
| 1  | 2.802804000  | -1.969119000 | 2.514872000  |
| 6  | 3.198963000  | -1.559226000 | -1.426765000 |
| 1  | 3.247449000  | -0.791343000 | -2.200081000 |
| 1  | 4.162610000  | -2.076100000 | -1.408162000 |
| 1  | 2.441422000  | -2.284581000 | -1.737371000 |
| 6  | 4.305294000  | 0.175133000  | 0.834922000  |
| 1  | 4.153952000  | 0.526999000  | 1.859812000  |
| 1  | 5.204199000  | -0.448351000 | 0.832181000  |
| 1  | 4.501728000  | 1.046043000  | 0.207757000  |
| 6  | 2.448305000  | 1.893347000  | -1.890377000 |
| 1  | 2.025105000  | 1.267865000  | -2.681772000 |
| 1  | 2.462064000  | 2.922187000  | -2.261387000 |
| 1  | 3.482427000  | 1.585744000  | -1.729919000 |
| 6  | -0.263773000 | 2.582599000  | -0.928638000 |
| 1  | -1.014698000 | 2.666624000  | -0.140745000 |
| 1  | -0.053535000 | 3.592869000  | -1.294215000 |
| 1  | -0.712965000 | 2.029451000  | -1.758803000 |
| 6  | 2.054547000  | 2.996305000  | 0.949018000  |
| 1  | 1.355367000  | 3.119306000  | 1.779939000  |
| 1  | 3.007770000  | 2.656544000  | 1.357845000  |
| 1  | 2.209917000  | 3.983391000  | 0.504583000  |
| 6  | -2.834837000 | -0.098935000 | 0.319535000  |
| 6  | -3.464173000 | -0.791703000 | -0.730551000 |
| 6  | -3.655801000 | 0.688295000  | 1.141886000  |
| 6  | -4.822255000 | -0.696436000 | -0.944840000 |
| 1  | -2.860869000 | -1.408770000 | -1.390050000 |
| 6  | -5.020754000 | 0.770472000  | 0.918946000  |
| 1  | -3.224632000 | 1.246392000  | 1.963286000  |
| 6  | -5.621599000 | 0.084796000  | -0.120965000 |
| 1  | -5.266488000 | -1.246476000 | -1.767657000 |

|   |              |              |              |
|---|--------------|--------------|--------------|
| 1 | -5.621806000 | 1.389435000  | 1.576912000  |
| 1 | -6.689553000 | 0.153712000  | -0.287903000 |
| 7 | -0.217833000 | -2.797630000 | -0.015263000 |
| 1 | 0.535420000  | -3.406827000 | -0.316783000 |
| 1 | -1.093795000 | -3.219559000 | -0.306102000 |
| 1 | -0.223221000 | -2.760425000 | 0.998612000  |

**2GeInt<sup>N-H</sup>** (T.E.= -3353.341754)

|    |              |              |              |
|----|--------------|--------------|--------------|
| 6  | -1.214032000 | 0.016636000  | -0.299534000 |
| 6  | -0.520598000 | 0.065362000  | -1.624373000 |
| 6  | 0.811503000  | -0.089170000 | -1.641570000 |
| 1  | -1.075984000 | 0.147949000  | -2.555821000 |
| 1  | 1.383693000  | -0.151867000 | -2.562883000 |
| 32 | 0.288434000  | 0.095139000  | 1.072101000  |
| 7  | 1.468776000  | -0.254592000 | -0.436049000 |
| 14 | -1.854940000 | -1.757432000 | -0.107084000 |
| 14 | -2.534970000 | 1.327040000  | -0.090265000 |
| 6  | -2.931435000 | -1.952147000 | 1.418776000  |
| 1  | -3.209479000 | -3.004397000 | 1.526381000  |
| 1  | -2.390412000 | -1.659142000 | 2.323159000  |
| 1  | -3.854103000 | -1.369368000 | 1.371787000  |
| 6  | -4.136529000 | 0.908863000  | -0.979545000 |
| 1  | -4.642519000 | 0.027391000  | -0.580874000 |
| 1  | -4.824022000 | 1.754871000  | -0.889337000 |
| 1  | -3.958628000 | 0.741180000  | -2.045829000 |
| 6  | -2.921206000 | 1.635396000  | 1.720319000  |
| 1  | -2.038801000 | 1.967716000  | 2.274765000  |
| 1  | -3.679955000 | 2.418169000  | 1.807548000  |
| 1  | -3.304532000 | 0.743888000  | 2.220512000  |
| 6  | -2.000978000 | 2.966290000  | -0.848260000 |
| 1  | -1.292201000 | 3.524740000  | -0.233588000 |
| 1  | -1.558155000 | 2.827487000  | -1.837844000 |
| 1  | -2.883111000 | 3.601024000  | -0.968020000 |
| 6  | -2.816452000 | -2.309637000 | -1.618270000 |
| 1  | -3.160734000 | -3.336209000 | -1.463406000 |
| 1  | -3.689766000 | -1.689104000 | -1.821224000 |
| 1  | -2.179207000 | -2.304196000 | -2.505456000 |
| 6  | -0.442542000 | -2.985826000 | 0.074874000  |
| 1  | -0.860938000 | -3.996617000 | 0.043708000  |
| 1  | 0.283484000  | -2.896356000 | -0.735891000 |

|   |             |              |              |
|---|-------------|--------------|--------------|
| 1 | 0.094427000 | -2.884465000 | 1.022147000  |
| 6 | 2.849432000 | -0.169871000 | -0.330814000 |
| 6 | 3.485793000 | -0.724115000 | 0.787233000  |
| 6 | 3.647612000 | 0.481427000  | -1.278922000 |
| 6 | 4.853424000 | -0.626956000 | 0.948773000  |
| 1 | 2.882727000 | -1.252636000 | 1.518965000  |
| 6 | 5.020073000 | 0.558219000  | -1.115416000 |
| 1 | 3.185747000 | 0.944560000  | -2.143695000 |
| 6 | 5.636318000 | 0.010481000  | -0.003039000 |
| 1 | 5.316681000 | -1.069928000 | 1.823673000  |
| 1 | 5.613650000 | 1.066399000  | -1.867710000 |
| 1 | 6.710431000 | 0.075911000  | 0.120332000  |
| 7 | 0.875297000 | 2.285808000  | 0.665946000  |
| 1 | 0.421216000 | 3.010104000  | 1.210227000  |
| 1 | 1.871807000 | 2.331687000  | 0.854348000  |
| 1 | 0.736732000 | 2.484012000  | -0.321008000 |

**3GeInt<sup>N-H</sup>** (T.E.= -3474.625509)

|    |              |              |              |
|----|--------------|--------------|--------------|
| 6  | 0.690545000  | 1.050297000  | -1.116657000 |
| 6  | 1.407144000  | 0.014019000  | -0.202002000 |
| 1  | 1.186818000  | 2.029041000  | -1.078545000 |
| 1  | 0.762003000  | 0.768489000  | -2.179292000 |
| 7  | -1.347696000 | 0.120987000  | 0.092359000  |
| 5  | -0.847612000 | 1.178652000  | -0.743738000 |
| 7  | -1.613410000 | 2.307046000  | -1.145205000 |
| 6  | -1.160443000 | 3.246165000  | -2.141777000 |
| 1  | -1.876762000 | 3.313698000  | -2.970849000 |
| 1  | -1.056802000 | 4.255998000  | -1.723143000 |
| 1  | -0.199471000 | 2.948494000  | -2.557247000 |
| 6  | -2.913828000 | 2.659196000  | -0.630266000 |
| 1  | -3.716905000 | 2.466215000  | -1.354388000 |
| 1  | -3.145179000 | 2.104232000  | 0.278303000  |
| 1  | -2.940842000 | 3.728622000  | -0.388916000 |
| 14 | 2.834565000  | 0.781035000  | 0.714424000  |
| 14 | 1.888078000  | -1.478319000 | -1.239430000 |
| 6  | 2.400238000  | 2.553847000  | 1.225039000  |
| 1  | 1.328188000  | 2.763751000  | 1.208326000  |
| 1  | 2.780963000  | 2.777657000  | 2.226255000  |
| 1  | 2.868056000  | 3.265249000  | 0.539870000  |
| 6  | 4.403014000  | 0.949910000  | -0.305943000 |

|    |              |              |              |
|----|--------------|--------------|--------------|
| 1  | 5.126687000  | 1.563691000  | 0.238489000  |
| 1  | 4.874361000  | -0.012104000 | -0.519495000 |
| 1  | 4.196089000  | 1.445063000  | -1.259237000 |
| 6  | 2.926916000  | -1.019789000 | -2.736775000 |
| 1  | 2.937282000  | -1.863601000 | -3.432719000 |
| 1  | 2.530497000  | -0.155404000 | -3.274376000 |
| 1  | 3.960789000  | -0.800512000 | -2.465482000 |
| 6  | 2.845913000  | -2.766724000 | -0.265965000 |
| 1  | 2.985976000  | -3.656469000 | -0.886210000 |
| 1  | 3.838320000  | -2.408651000 | 0.020529000  |
| 1  | 2.319174000  | -3.074125000 | 0.641205000  |
| 6  | 3.289345000  | -0.192735000 | 2.257584000  |
| 1  | 3.573065000  | -1.218708000 | 2.012539000  |
| 1  | 4.144450000  | 0.278836000  | 2.750312000  |
| 1  | 2.476445000  | -0.250724000 | 2.986193000  |
| 6  | 0.338388000  | -2.305565000 | -1.914693000 |
| 1  | -0.329602000 | -2.674242000 | -1.130329000 |
| 1  | -0.236036000 | -1.620107000 | -2.543275000 |
| 1  | 0.623774000  | -3.161955000 | -2.532458000 |
| 32 | 0.028867000  | -0.798908000 | 1.072246000  |
| 6  | -2.659635000 | -0.344276000 | 0.164893000  |
| 6  | -3.430846000 | -0.500364000 | -0.992130000 |
| 6  | -3.238930000 | -0.714570000 | 1.381883000  |
| 6  | -4.723062000 | -0.983932000 | -0.928657000 |
| 1  | -2.991302000 | -0.236726000 | -1.949133000 |
| 6  | -4.529937000 | -1.210224000 | 1.440030000  |
| 1  | -2.661849000 | -0.605541000 | 2.295004000  |
| 6  | -5.284916000 | -1.344489000 | 0.287382000  |
| 1  | -5.296055000 | -1.092152000 | -1.843149000 |
| 1  | -4.950510000 | -1.489459000 | 2.399913000  |
| 1  | -6.296712000 | -1.728990000 | 0.333626000  |
| 7  | -0.082521000 | 0.943645000  | 2.643756000  |
| 1  | 0.762972000  | 1.429501000  | 2.923495000  |
| 1  | -0.718426000 | 1.626522000  | 2.241383000  |
| 1  | -0.516186000 | 0.571830000  | 3.481653000  |

**4GeInt<sup>N-H</sup>** (T.E.= -3684.535597)

|   |              |              |             |
|---|--------------|--------------|-------------|
| 6 | -0.917221000 | -0.452773000 | 1.608341000 |
| 6 | -1.413392000 | 0.024432000  | 0.207699000 |
| 1 | -1.042690000 | 0.330713000  | 2.368351000 |

|    |              |              |              |
|----|--------------|--------------|--------------|
| 1  | -1.503167000 | -1.297236000 | 1.993331000  |
| 7  | 1.454213000  | 0.010416000  | 0.219469000  |
| 14 | -2.131173000 | 1.753786000  | 0.446166000  |
| 14 | -2.641144000 | -1.179258000 | -0.518844000 |
| 6  | -0.740444000 | 2.939210000  | 0.904417000  |
| 1  | -0.084092000 | 3.147803000  | 0.054716000  |
| 1  | -1.167598000 | 3.892788000  | 1.227140000  |
| 1  | -0.117660000 | 2.558805000  | 1.718160000  |
| 6  | -3.388641000 | 1.842250000  | 1.840554000  |
| 1  | -3.542185000 | 2.893303000  | 2.102000000  |
| 1  | -4.354416000 | 1.429024000  | 1.546866000  |
| 1  | -3.061991000 | 1.323283000  | 2.743980000  |
| 6  | -4.358769000 | -1.054004000 | 0.234771000  |
| 1  | -4.883233000 | -0.143126000 | -0.061915000 |
| 1  | -4.958575000 | -1.905959000 | -0.099089000 |
| 1  | -4.318379000 | -1.083044000 | 1.327181000  |
| 6  | -2.846599000 | -0.968703000 | -2.375461000 |
| 1  | -3.600961000 | -1.674440000 | -2.734961000 |
| 1  | -3.187088000 | 0.036867000  | -2.631458000 |
| 1  | -1.927637000 | -1.152540000 | -2.936081000 |
| 6  | -2.957414000 | 2.442379000  | -1.092785000 |
| 1  | -3.871044000 | 1.901072000  | -1.350851000 |
| 1  | -3.235703000 | 3.484263000  | -0.909457000 |
| 1  | -2.293335000 | 2.424625000  | -1.960719000 |
| 6  | -2.154765000 | -2.972053000 | -0.175220000 |
| 1  | -1.117150000 | -3.241737000 | -0.380155000 |
| 1  | -2.340768000 | -3.221398000 | 0.872894000  |
| 1  | -2.793576000 | -3.625884000 | -0.776426000 |
| 14 | 0.911955000  | -0.874490000 | 1.606561000  |
| 6  | 1.175359000  | -2.737120000 | 1.507800000  |
| 1  | 0.952742000  | -3.147124000 | 0.519273000  |
| 1  | 2.204276000  | -3.009893000 | 1.755724000  |
| 1  | 0.523266000  | -3.243806000 | 2.225257000  |
| 6  | 1.771642000  | -0.271270000 | 3.151800000  |
| 1  | 1.621265000  | 0.803319000  | 3.280321000  |
| 1  | 1.384368000  | -0.779074000 | 4.038677000  |
| 1  | 2.847380000  | -0.457617000 | 3.104951000  |
| 32 | 0.130995000  | 0.437472000  | -1.095074000 |
| 6  | 2.794997000  | 0.224620000  | -0.107031000 |
| 6  | 3.222835000  | 1.462468000  | -0.600476000 |



|   |              |              |              |
|---|--------------|--------------|--------------|
| 6 | 3.759950000  | -0.779599000 | 0.032030000  |
| 6 | 4.545076000  | 1.680864000  | -0.937549000 |
| 1 | 2.495226000  | 2.261481000  | -0.699818000 |
| 6 | 5.086484000  | -0.552217000 | -0.293988000 |
| 1 | 3.456667000  | -1.754771000 | 0.400125000  |
| 6 | 5.490142000  | 0.677362000  | -0.784829000 |
| 1 | 4.843757000  | 2.653307000  | -1.313590000 |
| 1 | 5.809523000  | -1.350891000 | -0.168251000 |
| 1 | 6.527393000  | 0.853868000  | -1.043024000 |
| 7 | 0.561362000  | -1.689537000 | -2.045894000 |
| 1 | -0.023360000 | -2.478985000 | -1.792991000 |
| 1 | 0.580119000  | -1.623497000 | -3.057149000 |
| 1 | 1.507392000  | -1.884399000 | -1.730465000 |

**5GeInt<sup>N-H</sup>** (T.E.= -3428.596519)

|    |              |              |              |
|----|--------------|--------------|--------------|
| 6  | 0.673241000  | -0.047319000 | 1.677848000  |
| 6  | 1.289555000  | -0.054959000 | 0.264615000  |
| 1  | 0.856026000  | -0.993867000 | 2.206775000  |
| 1  | 1.085948000  | 0.721215000  | 2.341613000  |
| 7  | -1.402449000 | -0.323638000 | 0.524946000  |
| 14 | 2.618679000  | -1.381441000 | 0.167948000  |
| 14 | 1.877297000  | 1.674110000  | -0.131695000 |
| 6  | 1.813478000  | -3.075898000 | 0.311334000  |
| 1  | 1.277023000  | -3.346293000 | -0.602103000 |
| 1  | 2.579893000  | -3.837460000 | 0.479389000  |
| 1  | 1.105961000  | -3.134949000 | 1.143182000  |
| 6  | 3.851437000  | -1.234027000 | 1.572558000  |
| 1  | 4.501694000  | -2.113097000 | 1.580554000  |
| 1  | 4.483043000  | -0.350251000 | 1.473399000  |
| 1  | 3.355001000  | -1.183232000 | 2.544692000  |
| 6  | 3.445130000  | 2.149556000  | 0.786955000  |
| 1  | 4.327981000  | 1.642598000  | 0.390504000  |
| 1  | 3.608425000  | 3.226365000  | 0.684878000  |
| 1  | 3.376835000  | 1.924881000  | 1.854521000  |
| 6  | 2.243277000  | 1.918370000  | -1.962509000 |
| 1  | 2.233033000  | 2.984216000  | -2.208013000 |
| 1  | 3.240745000  | 1.542226000  | -2.201571000 |
| 1  | 1.544993000  | 1.411938000  | -2.632032000 |
| 6  | 3.534998000  | -1.324993000 | -1.466072000 |
| 1  | 4.171601000  | -0.441640000 | -1.552141000 |

|    |              |              |              |
|----|--------------|--------------|--------------|
| 1  | 4.176962000  | -2.204593000 | -1.560662000 |
| 1  | 2.844369000  | -1.326610000 | -2.314168000 |
| 6  | 0.596418000  | 2.925984000  | 0.458763000  |
| 1  | -0.431671000 | 2.744847000  | 0.138250000  |
| 1  | 0.578651000  | 2.944319000  | 1.552052000  |
| 1  | 0.883353000  | 3.927000000  | 0.123974000  |
| 6  | -2.796441000 | -0.269867000 | 0.332358000  |
| 6  | -3.458758000 | -1.371695000 | -0.200585000 |
| 6  | -3.520235000 | 0.893597000  | 0.589028000  |
| 6  | -4.814554000 | -1.313495000 | -0.471697000 |
| 1  | -2.895143000 | -2.278217000 | -0.395276000 |
| 6  | -4.877481000 | 0.942768000  | 0.322392000  |
| 1  | -3.009400000 | 1.752347000  | 1.009132000  |
| 6  | -5.530898000 | -0.157226000 | -0.209805000 |
| 1  | -5.314939000 | -2.181512000 | -0.885643000 |
| 1  | -5.429256000 | 1.851896000  | 0.533464000  |
| 1  | -6.593354000 | -0.113510000 | -0.417774000 |
| 6  | -0.832454000 | 0.107676000  | 1.692209000  |
| 8  | -1.434953000 | 0.508720000  | 2.667622000  |
| 32 | -0.216587000 | -0.705737000 | -0.964918000 |
| 7  | -1.042367000 | 1.217139000  | -1.961049000 |
| 1  | -0.587507000 | 2.112216000  | -1.813480000 |
| 1  | -1.997240000 | 1.296949000  | -1.615807000 |
| 1  | -1.092844000 | 1.053338000  | -2.960459000 |

**8GeInt<sup>N-H</sup>** (T.E.= -2997.207170)

|    |              |              |              |
|----|--------------|--------------|--------------|
| 6  | 0.525512000  | -1.736474000 | 0.421462000  |
| 6  | -0.913493000 | -1.515317000 | 0.852185000  |
| 6  | -1.492406000 | -0.424674000 | -0.020205000 |
| 1  | 1.088858000  | -2.242466000 | 1.216730000  |
| 1  | 0.549279000  | -2.401824000 | -0.458905000 |
| 1  | -0.921649000 | -1.233971000 | 1.919323000  |
| 1  | -1.459637000 | -2.467025000 | 0.788849000  |
| 32 | -0.166539000 | 0.831550000  | -0.576435000 |
| 7  | 1.110331000  | -0.446693000 | 0.116476000  |
| 15 | -3.145654000 | -0.198461000 | -0.140843000 |
| 6  | -4.064133000 | -1.603049000 | -0.824525000 |
| 1  | -3.846957000 | -2.493548000 | -0.231617000 |
| 1  | -5.140860000 | -1.422621000 | -0.810275000 |
| 1  | -3.732675000 | -1.780446000 | -1.848037000 |

|   |              |              |              |
|---|--------------|--------------|--------------|
| 6 | -3.575931000 | 1.205452000  | -1.181016000 |
| 1 | -3.180823000 | 2.125117000  | -0.747841000 |
| 1 | -3.150228000 | 1.073041000  | -2.175940000 |
| 1 | -4.661523000 | 1.283919000  | -1.259208000 |
| 6 | -4.020750000 | 0.101802000  | 1.425112000  |
| 1 | -5.098735000 | 0.201444000  | 1.281092000  |
| 1 | -3.830419000 | -0.735313000 | 2.100644000  |
| 1 | -3.628457000 | 1.011873000  | 1.883024000  |
| 6 | 2.471373000  | -0.333892000 | -0.009843000 |
| 6 | 3.061691000  | 0.932708000  | -0.186864000 |
| 6 | 3.342478000  | -1.435858000 | 0.043887000  |
| 6 | 4.426837000  | 1.080687000  | -0.304955000 |
| 1 | 2.418802000  | 1.806530000  | -0.231496000 |
| 6 | 4.712800000  | -1.270493000 | -0.067799000 |
| 1 | 2.941801000  | -2.435045000 | 0.160793000  |
| 6 | 5.274396000  | -0.018248000 | -0.243376000 |
| 1 | 4.839423000  | 2.074891000  | -0.442550000 |
| 1 | 5.350986000  | -2.147137000 | -0.022405000 |
| 1 | 6.347271000  | 0.102491000  | -0.331150000 |
| 7 | 0.123414000  | 1.914666000  | 1.846179000  |
| 1 | -0.621291000 | 1.464984000  | 2.365343000  |
| 1 | 0.999776000  | 1.511823000  | 2.156903000  |
| 1 | 0.124651000  | 2.898931000  | 2.082317000  |

**9GeInt<sup>N-H</sup>** (T.E.= -2996.035431)

|    |              |              |              |
|----|--------------|--------------|--------------|
| 6  | 0.582921000  | -1.331509000 | -0.907578000 |
| 6  | -0.770100000 | -1.392463000 | -0.828685000 |
| 6  | -1.368630000 | -0.422567000 | 0.040554000  |
| 7  | 1.186159000  | -0.350730000 | -0.158535000 |
| 15 | -3.056186000 | -0.288630000 | 0.221624000  |
| 6  | -3.952139000 | -0.353463000 | -1.339158000 |
| 1  | -3.769537000 | -1.316827000 | -1.818743000 |
| 1  | -5.024363000 | -0.237164000 | -1.171548000 |
| 1  | -3.574556000 | 0.444161000  | -1.984716000 |
| 6  | -3.504211000 | 1.265774000  | 1.000038000  |
| 1  | -4.580053000 | 1.295933000  | 1.178760000  |
| 1  | -2.977994000 | 1.369111000  | 1.950189000  |
| 1  | -3.220966000 | 2.088586000  | 0.342313000  |
| 6  | -3.801937000 | -1.585329000 | 1.233309000  |
| 1  | -3.378357000 | -1.543138000 | 2.237409000  |

|    |              |              |              |
|----|--------------|--------------|--------------|
| 1  | -4.886880000 | -1.474581000 | 1.284170000  |
| 1  | -3.557289000 | -2.554480000 | 0.794602000  |
| 32 | -0.057106000 | 0.698592000  | 0.877496000  |
| 6  | 2.578387000  | -0.241987000 | -0.088498000 |
| 6  | 3.166382000  | 1.006176000  | 0.124010000  |
| 6  | 3.415885000  | -1.352542000 | -0.208363000 |
| 6  | 4.538091000  | 1.136424000  | 0.221287000  |
| 1  | 2.525749000  | 1.878812000  | 0.197874000  |
| 6  | 4.790018000  | -1.211740000 | -0.126860000 |
| 1  | 2.981979000  | -2.336888000 | -0.340883000 |
| 6  | 5.363106000  | 0.029799000  | 0.090649000  |
| 1  | 4.968600000  | 2.117859000  | 0.386639000  |
| 1  | 5.419057000  | -2.089992000 | -0.222099000 |
| 1  | 6.439322000  | 0.134921000  | 0.156862000  |
| 1  | 1.186331000  | -1.963722000 | -1.549351000 |
| 1  | -1.329528000 | -2.118147000 | -1.413474000 |
| 7  | -1.523408000 | 1.741415000  | -2.560797000 |
| 1  | -1.137856000 | 1.795463000  | -3.495918000 |
| 1  | -1.167583000 | 2.543824000  | -2.053821000 |
| 1  | -1.111776000 | 0.926539000  | -2.111399000 |

**$^{14}\text{GeInt}^{\text{N-H}}$  (T.E.= -3191.373558)**

|   |              |              |              |
|---|--------------|--------------|--------------|
| 6 | 1.173142000  | 1.246956000  | 0.129193000  |
| 6 | 1.640675000  | -0.094160000 | -0.033684000 |
| 7 | -1.020244000 | 0.056855000  | -0.320130000 |
| 6 | -2.350998000 | -0.312952000 | -0.146627000 |
| 6 | -3.076469000 | 0.099714000  | 0.977709000  |
| 6 | -4.387021000 | -0.298124000 | 1.170547000  |
| 6 | -5.009869000 | -1.138072000 | 0.260022000  |
| 6 | -4.299533000 | -1.570595000 | -0.848203000 |
| 6 | -2.991720000 | -1.165918000 | -1.051163000 |
| 1 | -2.589616000 | 0.749408000  | 1.699404000  |
| 1 | -4.925281000 | 0.046350000  | 2.047008000  |
| 1 | -6.035871000 | -1.451007000 | 0.412678000  |
| 1 | -4.771823000 | -2.225638000 | -1.572255000 |
| 1 | -2.447578000 | -1.492837000 | -1.931225000 |
| 5 | -0.426741000 | 1.345679000  | -0.112343000 |
| 7 | -1.115219000 | 2.579880000  | -0.212128000 |
| 6 | -0.567143000 | 3.843559000  | 0.226786000  |
| 1 | -0.524404000 | 4.559589000  | -0.604110000 |

|    |              |              |              |
|----|--------------|--------------|--------------|
| 1  | -1.205333000 | 4.288068000  | 1.002700000  |
| 1  | 0.438532000  | 3.703482000  | 0.616584000  |
| 6  | -2.444619000 | 2.733453000  | -0.748886000 |
| 1  | -3.185057000 | 2.953252000  | 0.033096000  |
| 1  | -2.462068000 | 3.569965000  | -1.457752000 |
| 1  | -2.769447000 | 1.839014000  | -1.277417000 |
| 15 | 3.329547000  | -0.306415000 | -0.005290000 |
| 6  | 4.111884000  | 0.078907000  | 1.575523000  |
| 1  | 5.194111000  | -0.054359000 | 1.517656000  |
| 1  | 3.877907000  | 1.113138000  | 1.827189000  |
| 1  | 3.704361000  | -0.577434000 | 2.345705000  |
| 6  | 4.246981000  | 0.662569000  | -1.218739000 |
| 1  | 5.321409000  | 0.499767000  | -1.114133000 |
| 1  | 3.927623000  | 0.374179000  | -2.220828000 |
| 1  | 4.009787000  | 1.713720000  | -1.055945000 |
| 6  | 3.762445000  | -2.022493000 | -0.336789000 |
| 1  | 3.301830000  | -2.671264000 | 0.410344000  |
| 1  | 3.395706000  | -2.312121000 | -1.322547000 |
| 1  | 4.845817000  | -2.149197000 | -0.303080000 |
| 8  | 1.935980000  | 2.207774000  | 0.368688000  |
| 32 | 0.259745000  | -1.398219000 | -0.489373000 |
| 7  | -0.235780000 | -1.829348000 | 1.725589000  |
| 1  | -0.074676000 | -0.940468000 | 2.189140000  |
| 1  | -1.213057000 | -2.078127000 | 1.843878000  |
| 1  | 0.330111000  | -2.537597000 | 2.177956000  |

**IIa-Int<sup>N-H</sup> (T.E.= -1112.372365)**

|    |              |              |              |
|----|--------------|--------------|--------------|
| 6  | -0.025928000 | 2.359471000  | 0.338925000  |
| 6  | -1.215791000 | 1.723213000  | 0.378288000  |
| 1  | -0.045212000 | 3.436250000  | 0.454862000  |
| 14 | 0.042803000  | -0.759188000 | -0.084494000 |
| 6  | 2.381680000  | 2.585394000  | 0.348287000  |
| 6  | 1.301824000  | 1.778920000  | 0.283434000  |
| 1  | 3.396610000  | 2.215075000  | 0.352950000  |
| 1  | 2.237463000  | 3.654296000  | 0.431228000  |
| 6  | -2.602099000 | -0.269391000 | 0.177745000  |
| 6  | -3.437914000 | -0.015676000 | -0.907494000 |
| 6  | -3.004254000 | -1.203209000 | 1.126973000  |
| 6  | -4.658035000 | -0.658303000 | -1.023658000 |
| 1  | -3.122310000 | 0.697825000  | -1.662994000 |

|   |              |              |              |
|---|--------------|--------------|--------------|
| 6 | -4.219222000 | -1.854191000 | 1.002985000  |
| 1 | -2.347354000 | -1.405677000 | 1.965599000  |
| 6 | -5.053550000 | -1.580567000 | -0.068264000 |
| 1 | -5.299075000 | -0.443940000 | -1.871145000 |
| 1 | -4.518073000 | -2.577063000 | 1.753264000  |
| 1 | -6.006988000 | -2.086845000 | -0.161267000 |
| 7 | -1.328389000 | 0.344121000  | 0.291622000  |
| 6 | 2.658080000  | -0.222963000 | 0.159239000  |
| 6 | 3.110423000  | -1.007615000 | 1.210932000  |
| 6 | 3.454360000  | -0.090214000 | -0.974707000 |
| 6 | 4.333403000  | -1.653968000 | 1.129057000  |
| 1 | 2.484763000  | -1.107388000 | 2.091082000  |
| 6 | 4.678801000  | -0.728473000 | -1.052585000 |
| 1 | 3.109016000  | 0.540174000  | -1.788399000 |
| 6 | 5.121554000  | -1.515478000 | -0.000112000 |
| 1 | 4.671378000  | -2.268462000 | 1.955601000  |
| 1 | 5.289055000  | -0.616095000 | -1.941454000 |
| 1 | 6.078867000  | -2.019542000 | -0.062189000 |
| 7 | 1.372740000  | 0.382863000  | 0.225021000  |
| 6 | -2.460163000 | 2.518354000  | 0.618668000  |
| 1 | -3.132702000 | 2.530040000  | -0.241330000 |
| 1 | -3.028997000 | 2.096564000  | 1.451995000  |
| 1 | -2.203479000 | 3.548136000  | 0.861352000  |
| 7 | -0.061286000 | -0.192942000 | -2.146388000 |
| 1 | 0.762969000  | -0.513638000 | -2.644528000 |
| 1 | -0.872150000 | -0.600355000 | -2.601763000 |
| 1 | -0.113487000 | 0.819166000  | -2.238003000 |

Cartesian coordinates of the transition states involved in the activation of N – H bond of NH<sub>3</sub> by CAASis (**1Si-5Si**, **8Si-9Si** and **14Si**), CAAGes (**1Ge-5Ge**, **8Ge-9Ge** and **14Ge**) and NacNacSi (**IIa**), along with their total energies (in hartrees) including zero point vibrational correction.

**1SiTS<sup>N-H</sup>** (T.E.= -1566.991204)

|   |              |              |              |
|---|--------------|--------------|--------------|
| 6 | -0.922725000 | -0.385463000 | -1.624122000 |
| 6 | 0.524770000  | 0.067713000  | -1.667177000 |
| 6 | 1.156723000  | 0.054185000  | -0.240339000 |
| 1 | -1.454484000 | -0.054250000 | -2.523051000 |
| 1 | -0.987100000 | -1.485288000 | -1.599077000 |
| 1 | 0.540185000  | 1.083460000  | -2.080410000 |

|    |              |              |              |
|----|--------------|--------------|--------------|
| 1  | 1.091814000  | -0.545228000 | -2.377669000 |
| 7  | -1.517662000 | 0.203373000  | -0.434925000 |
| 14 | -0.351806000 | 0.255196000  | 0.884165000  |
| 14 | 2.134392000  | -1.526290000 | 0.032628000  |
| 14 | 2.175474000  | 1.639681000  | -0.056399000 |
| 6  | 3.171315000  | 1.679285000  | 1.527972000  |
| 1  | 4.003300000  | 0.972130000  | 1.514177000  |
| 1  | 3.591839000  | 2.680202000  | 1.658309000  |
| 1  | 2.551361000  | 1.463271000  | 2.401739000  |
| 6  | 1.033711000  | 3.131021000  | -0.049320000 |
| 1  | 0.477271000  | 3.202623000  | 0.888030000  |
| 1  | 1.632002000  | 4.040615000  | -0.154236000 |
| 1  | 0.309083000  | 3.114557000  | -0.867334000 |
| 6  | 3.345262000  | 1.856155000  | -1.506919000 |
| 1  | 3.817221000  | 2.840121000  | -1.437352000 |
| 1  | 4.136527000  | 1.105933000  | -1.518878000 |
| 1  | 2.824153000  | 1.810589000  | -2.466027000 |
| 6  | 2.667984000  | -1.756103000 | 1.820714000  |
| 1  | 2.907685000  | -2.809669000 | 1.990847000  |
| 1  | 3.571041000  | -1.179851000 | 2.031246000  |
| 1  | 1.918266000  | -1.461729000 | 2.557236000  |
| 6  | 1.126515000  | -3.020674000 | -0.503453000 |
| 1  | 0.145693000  | -3.087628000 | -0.027804000 |
| 1  | 0.968917000  | -3.015868000 | -1.585019000 |
| 1  | 1.682487000  | -3.931084000 | -0.261597000 |
| 6  | 3.695133000  | -1.577700000 | -1.007938000 |
| 1  | 4.469125000  | -0.911066000 | -0.621341000 |
| 1  | 4.098008000  | -2.594474000 | -0.992879000 |
| 1  | 3.508332000  | -1.310355000 | -2.050876000 |
| 6  | -2.895112000 | 0.163643000  | -0.265779000 |
| 6  | -3.738551000 | -0.533115000 | -1.135955000 |
| 6  | -3.485654000 | 0.841572000  | 0.810167000  |
| 6  | -5.109458000 | -0.547232000 | -0.932070000 |
| 1  | -3.324331000 | -1.075334000 | -1.976746000 |
| 6  | -4.850229000 | 0.813844000  | 1.006655000  |
| 1  | -2.849986000 | 1.409730000  | 1.482776000  |
| 6  | -5.679534000 | 0.118831000  | 0.136873000  |
| 1  | -5.737526000 | -1.096169000 | -1.625365000 |
| 1  | -5.274427000 | 1.353443000  | 1.846319000  |
| 1  | -6.751671000 | 0.103036000  | 0.290036000  |

|   |              |              |             |
|---|--------------|--------------|-------------|
| 1 | -0.391219000 | -0.063071000 | 2.490515000 |
| 7 | -0.665817000 | -1.284532000 | 1.949145000 |
| 1 | -1.649360000 | -1.399565000 | 2.175750000 |
| 1 | -0.193577000 | -2.186966000 | 1.977777000 |

**2SiTS<sup>N-H</sup>** (T.E.= -1564.723377)

|    |              |              |              |
|----|--------------|--------------|--------------|
| 6  | -1.159133000 | 0.003669000  | -0.222613000 |
| 6  | -0.494388000 | -0.006170000 | -1.575967000 |
| 6  | 0.840208000  | -0.073544000 | -1.595812000 |
| 1  | -1.072431000 | -0.015195000 | -2.494660000 |
| 1  | 1.430703000  | -0.149764000 | -2.501413000 |
| 14 | 0.317663000  | 0.174305000  | 0.943467000  |
| 7  | 1.492381000  | -0.114471000 | -0.363727000 |
| 14 | -1.823839000 | -1.754192000 | 0.063274000  |
| 14 | -2.443349000 | 1.371652000  | -0.099173000 |
| 6  | -2.823983000 | -2.348105000 | -1.405287000 |
| 1  | -3.156156000 | -3.371758000 | -1.210762000 |
| 1  | -3.708835000 | -1.740627000 | -1.597684000 |
| 1  | -2.216095000 | -2.366619000 | -2.312589000 |
| 6  | -2.877711000 | -1.845733000 | 1.608959000  |
| 1  | -3.150574000 | -2.887643000 | 1.796923000  |
| 1  | -2.332537000 | -1.480123000 | 2.483033000  |
| 1  | -3.803192000 | -1.272071000 | 1.517235000  |
| 6  | -0.405399000 | -2.968508000 | 0.249675000  |
| 1  | -0.816469000 | -3.979647000 | 0.324282000  |
| 1  | 0.257204000  | -2.941690000 | -0.618281000 |
| 1  | 0.195556000  | -2.788013000 | 1.144634000  |
| 6  | -2.881883000 | 1.768500000  | 1.680260000  |
| 1  | -3.653645000 | 2.543251000  | 1.694100000  |
| 1  | -3.280827000 | 0.895289000  | 2.200562000  |
| 1  | -2.032439000 | 2.138037000  | 2.258106000  |
| 6  | -1.767289000 | 2.904656000  | -0.946275000 |
| 1  | -0.721574000 | 3.105263000  | -0.701901000 |
| 1  | -1.819895000 | 2.784953000  | -2.031242000 |
| 1  | -2.359942000 | 3.783792000  | -0.679537000 |
| 6  | -4.033009000 | 0.943786000  | -0.995038000 |
| 1  | -4.592535000 | 0.141368000  | -0.509492000 |
| 1  | -4.674494000 | 1.829538000  | -1.017122000 |
| 1  | -3.840561000 | 0.648946000  | -2.029962000 |
| 6  | 2.880367000  | -0.071388000 | -0.239391000 |



|   |             |              |              |
|---|-------------|--------------|--------------|
| 6 | 3.478308000 | -0.554099000 | 0.927963000  |
| 6 | 3.705298000 | 0.457594000  | -1.233434000 |
| 6 | 4.848213000 | -0.500893000 | 1.095364000  |
| 1 | 2.847765000 | -0.990122000 | 1.697067000  |
| 6 | 5.078078000 | 0.492567000  | -1.062045000 |
| 1 | 3.269119000 | 0.864479000  | -2.137906000 |
| 6 | 5.662130000 | 0.020049000  | 0.100872000  |
| 1 | 5.285878000 | -0.885902000 | 2.009705000  |
| 1 | 5.697451000 | 0.909460000  | -1.848502000 |
| 1 | 6.736940000 | 0.054315000  | 0.230517000  |
| 1 | 0.285874000 | 0.945973000  | 2.385453000  |
| 7 | 0.584584000 | 1.950782000  | 1.501010000  |
| 1 | 1.552062000 | 2.135570000  | 1.750100000  |
| 1 | 0.129400000 | 2.815752000  | 1.209000000  |

**3SiTS<sup>N-H</sup> (T.E.= -1687.094651)**

|    |              |              |              |
|----|--------------|--------------|--------------|
| 6  | -0.695083000 | 1.033668000  | -1.076354000 |
| 6  | -1.397492000 | -0.078192000 | -0.214941000 |
| 1  | -0.699829000 | 0.744917000  | -2.138135000 |
| 1  | -1.250655000 | 1.974662000  | -1.032392000 |
| 14 | 0.010873000  | -1.334027000 | -0.142934000 |
| 7  | 1.320228000  | -0.148792000 | -0.172126000 |
| 5  | 0.825271000  | 1.133368000  | -0.625329000 |
| 7  | 1.568473000  | 2.335736000  | -0.643879000 |
| 6  | 1.087013000  | 3.541420000  | -1.274897000 |
| 1  | 0.921408000  | 4.338587000  | -0.538220000 |
| 1  | 1.818085000  | 3.918212000  | -2.001024000 |
| 1  | 0.153236000  | 3.364990000  | -1.805422000 |
| 6  | 2.850943000  | 2.542552000  | -0.012598000 |
| 1  | 2.823868000  | 3.459461000  | 0.588141000  |
| 1  | 3.107426000  | 1.718394000  | 0.650214000  |
| 1  | 3.658931000  | 2.653079000  | -0.747491000 |
| 14 | -2.867506000 | -0.809918000 | -1.130918000 |
| 14 | -1.812399000 | 0.703999000  | 1.448257000  |
| 6  | -2.396578000 | -1.209636000 | -2.903712000 |
| 1  | -1.501918000 | -1.834776000 | -2.958236000 |
| 1  | -3.218621000 | -1.758850000 | -3.371723000 |
| 1  | -2.222958000 | -0.310380000 | -3.499051000 |
| 6  | -4.309177000 | 0.390222000  | -1.232016000 |
| 1  | -5.076235000 | -0.021867000 | -1.893850000 |

|   |              |              |              |
|---|--------------|--------------|--------------|
| 1 | -4.777806000 | 0.586788000  | -0.264978000 |
| 1 | -3.990159000 | 1.347406000  | -1.654198000 |
| 6 | -2.591157000 | 2.399288000  | 1.222432000  |
| 1 | -3.415105000 | 2.410619000  | 0.507098000  |
| 1 | -2.979352000 | 2.734456000  | 2.188824000  |
| 1 | -1.848065000 | 3.133121000  | 0.898136000  |
| 6 | -3.016244000 | -0.318358000 | 2.468969000  |
| 1 | -3.088147000 | 0.129282000  | 3.464503000  |
| 1 | -4.019363000 | -0.310826000 | 2.036161000  |
| 1 | -2.725067000 | -1.363445000 | 2.596305000  |
| 6 | -3.460510000 | -2.408620000 | -0.347354000 |
| 1 | -3.810035000 | -2.282645000 | 0.678516000  |
| 1 | -4.292112000 | -2.808405000 | -0.934391000 |
| 1 | -2.668860000 | -3.163087000 | -0.349519000 |
| 6 | -0.307102000 | 1.026888000  | 2.531643000  |
| 1 | 0.167681000  | 0.114233000  | 2.895615000  |
| 1 | 0.456325000  | 1.611853000  | 2.010839000  |
| 1 | -0.636851000 | 1.606333000  | 3.399645000  |
| 6 | 2.665904000  | -0.556685000 | -0.109395000 |
| 6 | 3.464838000  | -0.541487000 | -1.250111000 |
| 6 | 3.221030000  | -1.006755000 | 1.085984000  |
| 6 | 4.785520000  | -0.946095000 | -1.192190000 |
| 1 | 3.029208000  | -0.202593000 | -2.184533000 |
| 6 | 4.542100000  | -1.420579000 | 1.139757000  |
| 1 | 2.612645000  | -0.990255000 | 1.984264000  |
| 6 | 5.331357000  | -1.389572000 | 0.003057000  |
| 1 | 5.392753000  | -0.923207000 | -2.090061000 |
| 1 | 4.958758000  | -1.760721000 | 2.081208000  |
| 1 | 6.365608000  | -1.709397000 | 0.046449000  |
| 1 | -0.291772000 | -2.890223000 | 0.321955000  |
| 7 | -0.095371000 | -2.266136000 | 1.487378000  |
| 1 | 0.768569000  | -2.719139000 | 1.767795000  |
| 1 | -0.686978000 | -2.098192000 | 2.303273000  |

**4SiTS<sup>N-H</sup> (T.E.= -1897.003615)**

|    |              |              |              |
|----|--------------|--------------|--------------|
| 6  | -0.895056000 | -0.104570000 | 1.580937000  |
| 6  | -1.372395000 | 0.065069000  | 0.092255000  |
| 1  | -1.094418000 | 0.801204000  | 2.166647000  |
| 1  | -1.448915000 | -0.893870000 | 2.102544000  |
| 14 | 0.130241000  | 0.042842000  | -1.079316000 |

|    |              |              |              |
|----|--------------|--------------|--------------|
| 7  | 1.424463000  | -0.022271000 | 0.080154000  |
| 14 | -2.067079000 | 1.817595000  | -0.082203000 |
| 14 | -2.615952000 | -1.285266000 | -0.302112000 |
| 6  | -0.671569000 | 3.059055000  | 0.127524000  |
| 1  | 0.036491000  | 3.023522000  | -0.704426000 |
| 1  | -1.088043000 | 4.069467000  | 0.168531000  |
| 1  | -0.112018000 | 2.893325000  | 1.052675000  |
| 6  | -3.333158000 | 2.221401000  | 1.245992000  |
| 1  | -3.593636000 | 3.279863000  | 1.151890000  |
| 1  | -4.252431000 | 1.643282000  | 1.138784000  |
| 1  | -2.955504000 | 2.068658000  | 2.259128000  |
| 6  | -4.218263000 | -1.076530000 | 0.651180000  |
| 1  | -4.830058000 | -0.272192000 | 0.235922000  |
| 1  | -4.798254000 | -2.001472000 | 0.587289000  |
| 1  | -4.046447000 | -0.860726000 | 1.708624000  |
| 6  | -3.086109000 | -1.372197000 | -2.119786000 |
| 1  | -3.595284000 | -2.323070000 | -2.303345000 |
| 1  | -3.784359000 | -0.575744000 | -2.383149000 |
| 1  | -2.243673000 | -1.309361000 | -2.810342000 |
| 6  | -2.893581000 | 2.116206000  | -1.736085000 |
| 1  | -3.854469000 | 1.599382000  | -1.799715000 |
| 1  | -3.088443000 | 3.186228000  | -1.849589000 |
| 1  | -2.272957000 | 1.796107000  | -2.575808000 |
| 6  | -1.922524000 | -2.957091000 | 0.215594000  |
| 1  | -0.925019000 | -3.157757000 | -0.182658000 |
| 1  | -1.864526000 | -3.049236000 | 1.302887000  |
| 1  | -2.591211000 | -3.746713000 | -0.139048000 |
| 14 | 0.954324000  | -0.431561000 | 1.701550000  |
| 6  | 1.326488000  | -2.210858000 | 2.136060000  |
| 1  | 0.910222000  | -2.889760000 | 1.386884000  |
| 1  | 2.402961000  | -2.388031000 | 2.198403000  |
| 1  | 0.890672000  | -2.470711000 | 3.104695000  |
| 6  | 1.825896000  | 0.688618000  | 2.912118000  |
| 1  | 1.613755000  | 1.737721000  | 2.689367000  |
| 1  | 1.518980000  | 0.486698000  | 3.940816000  |
| 1  | 2.908295000  | 0.546103000  | 2.852418000  |
| 6  | 2.777735000  | 0.103459000  | -0.299894000 |
| 6  | 3.586439000  | -1.019134000 | -0.464802000 |
| 6  | 3.331180000  | 1.363512000  | -0.513278000 |
| 6  | 4.915961000  | -0.882284000 | -0.829804000 |

|   |              |              |              |
|---|--------------|--------------|--------------|
| 1 | 3.153388000  | -2.002261000 | -0.305312000 |
| 6 | 4.657775000  | 1.496889000  | -0.881421000 |
| 1 | 2.697820000  | 2.234737000  | -0.378605000 |
| 6 | 5.456740000  | 0.374902000  | -1.039592000 |
| 1 | 5.531659000  | -1.765985000 | -0.953925000 |
| 1 | 5.072607000  | 2.485278000  | -1.043959000 |
| 1 | 6.496134000  | 0.480814000  | -1.327028000 |
| 1 | 0.098703000  | -0.366948000 | -2.668694000 |
| 7 | 0.246806000  | -1.581728000 | -2.083543000 |
| 1 | -0.336094000 | -2.416960000 | -2.093940000 |
| 1 | 1.210355000  | -1.822815000 | -2.297083000 |

**5SiTS<sup>N-H</sup>** (T.E.= -1639.897650)

|    |              |              |              |
|----|--------------|--------------|--------------|
| 6  | 0.625186000  | -0.195040000 | 1.598627000  |
| 6  | 1.246319000  | -0.105144000 | 0.182991000  |
| 1  | 0.816163000  | -1.169647000 | 2.067053000  |
| 1  | 1.030082000  | 0.536337000  | 2.306650000  |
| 14 | -0.220164000 | -0.467198000 | -0.956508000 |
| 7  | -1.410973000 | -0.284526000 | 0.352086000  |
| 14 | 2.527038000  | -1.477814000 | -0.017341000 |
| 14 | 1.882534000  | 1.650824000  | -0.092577000 |
| 6  | 1.647538000  | -3.135083000 | 0.014037000  |
| 1  | 1.069284000  | -3.296485000 | -0.898860000 |
| 1  | 2.379888000  | -3.942700000 | 0.096479000  |
| 1  | 0.963251000  | -3.225730000 | 0.862057000  |
| 6  | 3.758225000  | -1.476680000 | 1.396272000  |
| 1  | 4.374351000  | -2.377407000 | 1.327142000  |
| 1  | 4.424462000  | -0.613359000 | 1.371407000  |
| 1  | 3.265277000  | -1.492115000 | 2.371381000  |
| 6  | 3.424808000  | 1.959595000  | 0.927199000  |
| 1  | 4.290736000  | 1.439657000  | 0.510673000  |
| 1  | 3.647969000  | 3.030162000  | 0.918806000  |
| 1  | 3.311794000  | 1.649549000  | 1.968636000  |
| 6  | 2.305292000  | 2.000571000  | -1.896407000 |
| 1  | 1.587315000  | 2.697830000  | -2.335197000 |
| 1  | 3.293382000  | 2.462432000  | -1.966426000 |
| 1  | 2.326828000  | 1.102131000  | -2.516854000 |
| 6  | 3.459507000  | -1.334147000 | -1.633625000 |
| 1  | 4.076968000  | -0.433746000 | -1.679095000 |
| 1  | 4.123367000  | -2.195485000 | -1.744960000 |

|   |              |              |              |
|---|--------------|--------------|--------------|
| 1 | 2.781325000  | -1.327993000 | -2.491280000 |
| 6 | 0.584375000  | 2.883135000  | 0.473056000  |
| 1 | -0.301114000 | 2.866962000  | -0.166634000 |
| 1 | 0.259950000  | 2.709281000  | 1.501977000  |
| 1 | 1.005228000  | 3.891380000  | 0.428542000  |
| 6 | -2.812880000 | -0.261684000 | 0.145908000  |
| 6 | -3.440733000 | -1.353416000 | -0.438013000 |
| 6 | -3.558520000 | 0.861423000  | 0.482133000  |
| 6 | -4.801990000 | -1.320692000 | -0.686877000 |
| 1 | -2.851001000 | -2.227529000 | -0.692370000 |
| 6 | -4.920277000 | 0.884663000  | 0.239475000  |
| 1 | -3.063629000 | 1.708270000  | 0.943728000  |
| 6 | -5.546293000 | -0.203364000 | -0.347401000 |
| 1 | -5.283691000 | -2.177523000 | -1.143710000 |
| 1 | -5.496566000 | 1.761894000  | 0.510103000  |
| 1 | -6.612665000 | -0.180328000 | -0.538291000 |
| 6 | -0.881568000 | -0.054688000 | 1.601449000  |
| 8 | -1.521022000 | 0.177020000  | 2.602045000  |
| 1 | -1.019522000 | -0.437672000 | -2.374114000 |
| 7 | -0.828829000 | 0.892203000  | -2.089155000 |
| 1 | -0.233969000 | 1.173709000  | -2.860350000 |
| 1 | -1.504314000 | 1.620170000  | -1.856332000 |

**8SiTS<sup>N-H</sup> (T.E.= -1209.672068)**

|    |              |              |              |
|----|--------------|--------------|--------------|
| 6  | 0.504465000  | -1.694022000 | -0.376965000 |
| 6  | -0.986711000 | -1.737979000 | -0.077435000 |
| 6  | -1.531450000 | -0.326921000 | -0.246061000 |
| 1  | 1.015968000  | -2.555875000 | 0.066435000  |
| 1  | 0.665605000  | -1.745615000 | -1.466784000 |
| 1  | -1.125733000 | -2.126181000 | 0.944261000  |
| 1  | -1.462447000 | -2.463175000 | -0.750083000 |
| 14 | -0.179728000 | 0.836939000  | 0.068314000  |
| 7  | 1.040101000  | -0.450302000 | 0.158675000  |
| 15 | -3.131245000 | 0.001547000  | 0.129448000  |
| 6  | -4.299891000 | -1.037115000 | -0.776849000 |
| 1  | -4.103314000 | -2.084516000 | -0.539159000 |
| 1  | -5.330195000 | -0.801374000 | -0.504228000 |
| 1  | -4.157773000 | -0.891088000 | -1.847921000 |
| 6  | -3.653402000 | -0.229287000 | 1.856092000  |
| 1  | -3.080215000 | 0.453782000  | 2.485925000  |

|   |              |              |              |
|---|--------------|--------------|--------------|
| 1 | -4.721413000 | -0.047097000 | 1.993906000  |
| 1 | -3.425813000 | -1.252296000 | 2.162660000  |
| 6 | -3.561396000 | 1.707156000  | -0.242460000 |
| 1 | -2.898135000 | 2.370914000  | 0.316414000  |
| 1 | -3.431621000 | 1.894222000  | -1.308774000 |
| 1 | -4.595365000 | 1.908338000  | 0.042411000  |
| 6 | 2.407179000  | -0.253074000 | 0.174654000  |
| 6 | 3.314404000  | -1.191721000 | -0.333283000 |
| 6 | 2.939917000  | 0.927527000  | 0.718046000  |
| 6 | 4.679245000  | -0.955135000 | -0.292908000 |
| 1 | 2.953397000  | -2.113654000 | -0.771134000 |
| 6 | 4.299239000  | 1.152867000  | 0.747182000  |
| 1 | 2.257629000  | 1.663279000  | 1.134019000  |
| 6 | 5.188728000  | 0.213774000  | 0.241530000  |
| 1 | 5.352884000  | -1.704497000 | -0.695179000 |
| 1 | 4.672329000  | 2.075473000  | 1.179070000  |
| 1 | 6.256861000  | 0.392034000  | 0.268447000  |
| 1 | -0.223410000 | 2.422966000  | -0.349249000 |
| 7 | 0.149295000  | 1.820375000  | -1.519690000 |
| 1 | 1.093868000  | 2.152298000  | -1.689520000 |
| 1 | -0.355959000 | 1.664783000  | -2.391795000 |

**9SiTS<sup>N-H</sup>** (T.E.= -1208.485093)

|    |              |              |              |
|----|--------------|--------------|--------------|
| 6  | 0.414962000  | -1.653299000 | 0.139086000  |
| 6  | -0.920360000 | -1.602352000 | 0.286347000  |
| 6  | -1.519977000 | -0.278755000 | 0.193891000  |
| 14 | -0.163732000 | 0.897247000  | -0.128373000 |
| 7  | 1.042713000  | -0.426330000 | -0.125185000 |
| 15 | -3.157864000 | -0.061551000 | -0.122423000 |
| 6  | -3.760071000 | -0.668056000 | -1.721502000 |
| 1  | -3.504757000 | -1.725843000 | -1.811008000 |
| 1  | -4.840809000 | -0.547713000 | -1.821586000 |
| 1  | -3.252422000 | -0.123558000 | -2.519110000 |
| 6  | -3.610398000 | 1.676068000  | -0.081194000 |
| 1  | -4.662052000 | 1.796753000  | -0.346046000 |
| 1  | -3.436284000 | 2.079765000  | 0.916636000  |
| 1  | -2.992400000 | 2.224239000  | -0.794906000 |
| 6  | -4.232931000 | -0.907626000 | 1.057469000  |
| 1  | -4.056830000 | -0.509057000 | 2.056693000  |
| 1  | -5.283896000 | -0.784879000 | 0.788681000  |

|   |              |              |              |
|---|--------------|--------------|--------------|
| 1 | -3.990612000 | -1.971997000 | 1.060555000  |
| 6 | 2.420744000  | -0.278713000 | -0.146457000 |
| 6 | 2.990369000  | 0.867394000  | -0.717288000 |
| 6 | 3.289892000  | -1.230646000 | 0.398212000  |
| 6 | 4.357377000  | 1.052438000  | -0.735674000 |
| 1 | 2.335147000  | 1.608486000  | -1.166192000 |
| 6 | 4.659999000  | -1.038165000 | 0.366658000  |
| 1 | 2.888965000  | -2.117772000 | 0.872539000  |
| 6 | 5.210669000  | 0.100680000  | -0.195157000 |
| 1 | 4.763068000  | 1.950363000  | -1.189393000 |
| 1 | 5.306365000  | -1.793694000 | 0.800513000  |
| 1 | 6.284015000  | 0.245166000  | -0.214413000 |
| 1 | 1.002007000  | -2.561758000 | 0.137685000  |
| 1 | -1.499469000 | -2.510136000 | 0.431764000  |
| 1 | -0.256451000 | 2.492924000  | 0.259039000  |
| 7 | 0.144504000  | 1.906409000  | 1.438342000  |
| 1 | 1.082036000  | 2.267869000  | 1.589305000  |
| 1 | -0.337583000 | 1.748294000  | 2.324357000  |

**<sup>14</sup>SiTS<sup>N-H</sup> (T.E.= -1403.840992)**

|   |              |              |              |
|---|--------------|--------------|--------------|
| 6 | 1.218971000  | 1.140347000  | 0.122096000  |
| 6 | 1.669953000  | -0.212328000 | -0.040210000 |
| 7 | -0.952332000 | -0.082631000 | -0.274037000 |
| 6 | -2.301048000 | -0.452293000 | -0.138427000 |
| 6 | -3.012508000 | -0.112237000 | 1.011919000  |
| 6 | -4.336275000 | -0.484392000 | 1.161127000  |
| 6 | -4.972992000 | -1.220565000 | 0.174223000  |
| 6 | -4.268343000 | -1.580047000 | -0.963157000 |
| 6 | -2.946642000 | -1.199948000 | -1.121355000 |
| 1 | -2.507581000 | 0.462630000  | 1.782242000  |
| 1 | -4.873585000 | -0.201528000 | 2.059577000  |
| 1 | -6.009479000 | -1.513644000 | 0.291938000  |
| 1 | -4.754743000 | -2.155952000 | -1.742627000 |
| 1 | -2.396960000 | -1.468478000 | -2.017310000 |
| 5 | -0.386146000 | 1.230864000  | -0.076985000 |
| 7 | -1.096947000 | 2.447209000  | -0.149560000 |
| 6 | -0.541160000 | 3.712117000  | 0.281092000  |
| 1 | -0.538982000 | 4.435037000  | -0.544202000 |
| 1 | -1.150890000 | 4.141557000  | 1.086831000  |
| 1 | 0.480686000  | 3.577753000  | 0.628388000  |

|    |              |              |              |
|----|--------------|--------------|--------------|
| 6  | -2.444820000 | 2.599607000  | -0.642661000 |
| 1  | -3.155719000 | 2.822238000  | 0.164733000  |
| 1  | -2.483915000 | 3.435278000  | -1.351034000 |
| 1  | -2.789852000 | 1.706408000  | -1.159528000 |
| 15 | 3.353320000  | -0.472784000 | -0.050914000 |
| 6  | 4.163914000  | -0.072888000 | 1.507031000  |
| 1  | 5.241751000  | -0.229584000 | 1.431791000  |
| 1  | 3.955628000  | 0.970791000  | 1.741956000  |
| 1  | 3.754859000  | -0.705110000 | 2.295735000  |
| 6  | 4.242368000  | 0.469389000  | -1.301512000 |
| 1  | 5.317957000  | 0.301797000  | -1.221788000 |
| 1  | 3.894657000  | 0.168456000  | -2.290281000 |
| 1  | 4.015795000  | 1.524601000  | -1.147259000 |
| 6  | 3.727991000  | -2.202882000 | -0.366342000 |
| 1  | 3.276969000  | -2.822697000 | 0.410555000  |
| 1  | 3.317550000  | -2.499317000 | -1.332534000 |
| 1  | 4.808146000  | -2.357648000 | -0.366965000 |
| 8  | 1.992718000  | 2.094274000  | 0.328760000  |
| 14 | 0.287242000  | -1.344047000 | -0.389867000 |
| 1  | -0.363842000 | -2.843199000 | -0.273845000 |
| 7  | -0.244132000 | -2.465095000 | 1.036366000  |
| 1  | 0.447805000  | -3.104185000 | 1.410648000  |
| 1  | -0.961012000 | -2.244961000 | 1.727341000  |

**1GeTS<sup>N-H</sup> (T.E.= -3353.205377)**

|    |              |              |              |
|----|--------------|--------------|--------------|
| 6  | 0.849842000  | 0.485795000  | -1.744810000 |
| 6  | -0.622404000 | 0.108998000  | -1.803739000 |
| 6  | -1.242147000 | 0.028810000  | -0.383707000 |
| 1  | 1.329077000  | 0.278644000  | -2.710000000 |
| 1  | 0.958109000  | 1.566267000  | -1.565634000 |
| 1  | -0.699370000 | -0.862859000 | -2.306425000 |
| 1  | -1.161094000 | 0.822702000  | -2.436041000 |
| 32 | 0.212844000  | -0.967369000 | 0.522419000  |
| 7  | 1.474183000  | -0.287672000 | -0.693020000 |
| 14 | -1.485252000 | 1.756769000  | 0.351280000  |
| 14 | -2.777064000 | -1.068913000 | -0.384148000 |
| 6  | -2.408864000 | -2.662915000 | -1.305256000 |
| 1  | -1.525410000 | -3.175128000 | -0.914297000 |
| 1  | -3.260772000 | -3.337954000 | -1.185657000 |
| 1  | -2.263954000 | -2.505358000 | -2.376023000 |



|   |              |              |              |
|---|--------------|--------------|--------------|
| 6 | -3.293966000 | -1.545893000 | 1.353928000  |
| 1 | -3.787193000 | -0.730151000 | 1.882761000  |
| 1 | -3.998714000 | -2.379881000 | 1.298777000  |
| 1 | -2.444650000 | -1.876465000 | 1.959165000  |
| 6 | -4.222651000 | -0.255893000 | -1.257020000 |
| 1 | -3.934735000 | 0.105781000  | -2.247935000 |
| 1 | -5.026373000 | -0.984858000 | -1.391067000 |
| 1 | -4.629770000 | 0.586741000  | -0.694547000 |
| 6 | -2.467227000 | 1.702178000  | 1.950725000  |
| 1 | -2.107372000 | 0.954854000  | 2.661577000  |
| 1 | -2.395290000 | 2.681788000  | 2.431347000  |
| 1 | -3.527183000 | 1.504289000  | 1.775925000  |
| 6 | 0.112726000  | 2.687563000  | 0.710156000  |
| 1 | 0.517860000  | 3.141425000  | -0.197039000 |
| 1 | -0.113669000 | 3.502824000  | 1.403953000  |
| 1 | 0.896534000  | 2.075186000  | 1.158804000  |
| 6 | -2.420049000 | 2.841587000  | -0.862232000 |
| 1 | -1.842251000 | 3.005969000  | -1.775432000 |
| 1 | -3.394240000 | 2.438390000  | -1.144609000 |
| 1 | -2.581668000 | 3.820651000  | -0.401709000 |
| 6 | 2.830613000  | -0.194976000 | -0.469971000 |
| 6 | 3.454018000  | -1.028650000 | 0.471429000  |
| 6 | 3.638291000  | 0.718511000  | -1.159293000 |
| 6 | 4.808312000  | -0.943274000 | 0.715479000  |
| 1 | 2.859438000  | -1.773793000 | 0.993341000  |
| 6 | 4.997528000  | 0.794078000  | -0.904146000 |
| 1 | 3.199652000  | 1.378214000  | -1.896995000 |
| 6 | 5.597393000  | -0.026955000 | 0.033048000  |
| 1 | 5.256767000  | -1.608409000 | 1.445359000  |
| 1 | 5.594608000  | 1.514304000  | -1.453187000 |
| 1 | 6.660927000  | 0.038417000  | 0.226923000  |
| 1 | 0.340297000  | -1.668657000 | 2.008316000  |
| 7 | 0.608890000  | -0.245180000 | 2.360646000  |
| 1 | 0.092616000  | 0.459294000  | 2.881870000  |
| 1 | 1.599246000  | -0.170210000 | 2.570314000  |

**2GeTS<sup>N-H</sup>** (T.E.= -3353.260612)

|   |              |              |             |
|---|--------------|--------------|-------------|
| 6 | 1.249769000  | -0.056741000 | 0.336154000 |
| 6 | 0.527498000  | -0.164417000 | 1.650183000 |
| 6 | -0.807493000 | -0.260833000 | 1.657093000 |

|    |              |              |              |
|----|--------------|--------------|--------------|
| 1  | 1.083364000  | -0.196865000 | 2.582301000  |
| 1  | -1.378381000 | -0.391796000 | 2.569487000  |
| 32 | -0.257963000 | 0.035723000  | -0.952256000 |
| 7  | -1.490884000 | -0.259101000 | 0.451739000  |
| 14 | 2.126566000  | -1.701882000 | 0.006229000  |
| 14 | 2.298972000  | 1.507733000  | 0.255138000  |
| 6  | 3.137054000  | -1.632495000 | -1.569587000 |
| 1  | 3.497729000  | -2.635265000 | -1.813424000 |
| 1  | 2.542730000  | -1.279070000 | -2.416945000 |
| 1  | 4.009824000  | -0.982932000 | -1.473652000 |
| 6  | 3.865763000  | 1.336509000  | 1.269440000  |
| 1  | 4.571336000  | 0.627858000  | 0.830005000  |
| 1  | 4.364327000  | 2.307961000  | 1.329340000  |
| 1  | 3.648104000  | 1.012271000  | 2.290528000  |
| 6  | 2.795219000  | 1.907244000  | -1.511140000 |
| 1  | 1.951816000  | 1.907836000  | -2.206344000 |
| 1  | 3.250505000  | 2.900817000  | -1.544831000 |
| 1  | 3.530211000  | 1.194756000  | -1.890625000 |
| 6  | 1.323308000  | 2.933477000  | 0.974962000  |
| 1  | 0.357275000  | 3.056946000  | 0.479241000  |
| 1  | 1.134702000  | 2.771891000  | 2.038713000  |
| 1  | 1.886265000  | 3.864795000  | 0.869324000  |
| 6  | 3.235868000  | -2.173352000 | 1.438953000  |
| 1  | 3.643331000  | -3.172164000 | 1.259386000  |
| 1  | 4.075955000  | -1.489709000 | 1.571897000  |
| 1  | 2.674714000  | -2.210287000 | 2.375580000  |
| 6  | 0.851104000  | -3.064169000 | -0.175218000 |
| 1  | 1.359954000  | -4.029549000 | -0.245454000 |
| 1  | 0.182669000  | -3.101593000 | 0.688081000  |
| 1  | 0.239820000  | -2.950021000 | -1.074756000 |
| 6  | -2.876874000 | -0.194161000 | 0.359650000  |
| 6  | -3.508611000 | -0.585460000 | -0.824608000 |
| 6  | -3.677015000 | 0.267398000  | 1.408340000  |
| 6  | -4.881259000 | -0.517730000 | -0.953211000 |
| 1  | -2.903008000 | -0.962767000 | -1.642843000 |
| 6  | -5.053427000 | 0.318319000  | 1.273627000  |
| 1  | -3.219395000 | 0.610432000  | 2.328245000  |
| 6  | -5.669370000 | -0.069870000 | 0.096349000  |
| 1  | -5.341964000 | -0.831318000 | -1.883376000 |
| 1  | -5.650299000 | 0.681561000  | 2.103033000  |

|   |              |              |              |
|---|--------------|--------------|--------------|
| 1 | -6.746730000 | -0.022777000 | -0.004112000 |
| 1 | -0.922711000 | 0.574806000  | -2.341713000 |
| 7 | -0.893143000 | 1.858788000  | -1.529011000 |
| 1 | -0.256791000 | 2.531944000  | -1.940356000 |
| 1 | -1.669074000 | 2.327065000  | -1.068685000 |

**3GeTS<sup>N-H</sup>** (T.E.= -3474.555890)

|    |              |              |              |
|----|--------------|--------------|--------------|
| 6  | 0.713937000  | 0.881374000  | -1.223122000 |
| 6  | 1.457803000  | 0.050772000  | -0.135886000 |
| 1  | 1.253231000  | 1.813757000  | -1.421048000 |
| 1  | 0.719712000  | 0.337220000  | -2.179088000 |
| 7  | -1.344349000 | -0.000583000 | -0.057837000 |
| 5  | -0.813154000 | 1.094436000  | -0.822281000 |
| 7  | -1.528920000 | 2.272342000  | -1.152747000 |
| 6  | -1.039806000 | 3.256923000  | -2.086695000 |
| 1  | -1.785445000 | 3.454024000  | -2.867192000 |
| 1  | -0.830830000 | 4.213979000  | -1.589586000 |
| 1  | -0.128988000 | 2.920317000  | -2.578442000 |
| 6  | -2.791137000 | 2.668013000  | -0.574708000 |
| 1  | -3.615574000 | 2.609220000  | -1.297795000 |
| 1  | -3.049542000 | 2.048811000  | 0.282774000  |
| 1  | -2.730621000 | 3.707885000  | -0.231335000 |
| 14 | 1.884316000  | 1.170600000  | 1.326404000  |
| 14 | 2.904573000  | -0.920146000 | -0.842893000 |
| 6  | 0.368264000  | 1.703561000  | 2.302858000  |
| 1  | -0.147266000 | 0.864467000  | 2.777959000  |
| 1  | 0.703485000  | 2.373949000  | 3.100570000  |
| 1  | -0.360442000 | 2.248965000  | 1.697306000  |
| 6  | 2.681228000  | 2.762732000  | 0.735936000  |
| 1  | 3.001624000  | 3.341102000  | 1.607111000  |
| 1  | 3.551704000  | 2.604865000  | 0.097317000  |
| 1  | 1.961566000  | 3.375481000  | 0.185698000  |
| 6  | 4.419617000  | 0.158434000  | -1.094983000 |
| 1  | 5.185724000  | -0.413524000 | -1.626098000 |
| 1  | 4.167993000  | 1.025077000  | -1.713284000 |
| 1  | 4.860916000  | 0.522339000  | -0.165015000 |
| 6  | 3.355462000  | -2.379254000 | 0.247771000  |
| 1  | 4.182745000  | -2.932533000 | -0.205186000 |
| 1  | 3.668377000  | -2.073709000 | 1.247339000  |
| 1  | 2.520838000  | -3.076642000 | 0.364017000  |

|    |              |              |              |
|----|--------------|--------------|--------------|
| 6  | 3.009432000  | 0.309235000  | 2.554075000  |
| 1  | 3.994397000  | 0.072341000  | 2.146572000  |
| 1  | 3.156524000  | 0.962513000  | 3.418450000  |
| 1  | 2.559318000  | -0.619903000 | 2.915476000  |
| 6  | 2.475835000  | -1.588301000 | -2.543590000 |
| 1  | 1.514434000  | -2.106101000 | -2.557077000 |
| 1  | 2.440125000  | -0.791754000 | -3.290334000 |
| 1  | 3.249594000  | -2.295637000 | -2.855036000 |
| 32 | 0.024818000  | -1.155430000 | 0.508789000  |
| 6  | -2.683768000 | -0.371425000 | 0.114004000  |
| 6  | -3.531812000 | -0.503346000 | -0.986351000 |
| 6  | -3.199627000 | -0.641241000 | 1.381349000  |
| 6  | -4.856969000 | -0.863225000 | -0.819878000 |
| 1  | -3.131907000 | -0.307148000 | -1.976619000 |
| 6  | -4.523093000 | -1.011173000 | 1.542961000  |
| 1  | -2.548475000 | -0.540881000 | 2.243822000  |
| 6  | -5.361922000 | -1.118418000 | 0.445357000  |
| 1  | -5.499831000 | -0.952196000 | -1.688553000 |
| 1  | -4.904371000 | -1.209542000 | 2.538422000  |
| 1  | -6.399290000 | -1.403579000 | 0.573933000  |
| 1  | -0.561121000 | -2.656613000 | 0.791143000  |
| 7  | -0.398324000 | -2.696802000 | -0.713640000 |
| 1  | 0.292137000  | -3.399792000 | -0.947448000 |
| 1  | -1.123123000 | -2.634183000 | -1.422807000 |

**4GeTS<sup>N-H</sup> (T.E.= -3684.463761)**

|    |              |              |              |
|----|--------------|--------------|--------------|
| 6  | -0.920252000 | -0.518146000 | 1.585668000  |
| 6  | -1.447963000 | 0.022860000  | 0.218820000  |
| 1  | -1.069773000 | 0.219923000  | 2.384626000  |
| 1  | -1.489764000 | -1.396753000 | 1.913510000  |
| 7  | 1.471960000  | -0.026006000 | 0.234873000  |
| 14 | -2.160632000 | 1.750464000  | 0.504017000  |
| 14 | -2.630754000 | -1.206570000 | -0.572043000 |
| 6  | -0.761665000 | 2.904839000  | 0.996589000  |
| 1  | -0.109904000 | 3.127404000  | 0.146902000  |
| 1  | -1.174422000 | 3.853889000  | 1.349233000  |
| 1  | -0.137662000 | 2.495022000  | 1.794729000  |
| 6  | -3.426436000 | 1.770705000  | 1.887572000  |
| 1  | -3.653001000 | 2.811139000  | 2.137328000  |
| 1  | -4.359998000 | 1.290352000  | 1.591886000  |

|    |              |              |              |
|----|--------------|--------------|--------------|
| 1  | -3.071363000 | 1.284164000  | 2.798190000  |
| 6  | -4.256952000 | -1.295805000 | 0.358378000  |
| 1  | -4.871369000 | -0.406406000 | 0.201690000  |
| 1  | -4.827255000 | -2.158887000 | 0.003925000  |
| 1  | -4.104231000 | -1.417769000 | 1.433891000  |
| 6  | -3.019389000 | -0.775894000 | -2.359507000 |
| 1  | -3.439243000 | -1.656942000 | -2.853308000 |
| 1  | -3.762318000 | 0.020562000  | -2.428288000 |
| 1  | -2.149308000 | -0.458787000 | -2.939509000 |
| 6  | -2.968357000 | 2.461202000  | -1.029937000 |
| 1  | -3.906190000 | 1.955121000  | -1.270748000 |
| 1  | -3.197975000 | 3.516254000  | -0.857468000 |
| 1  | -2.315819000 | 2.401635000  | -1.904863000 |
| 6  | -1.893832000 | -2.931128000 | -0.533805000 |
| 1  | -0.962954000 | -2.982422000 | -1.102797000 |
| 1  | -1.688478000 | -3.275002000 | 0.482603000  |
| 1  | -2.604295000 | -3.632389000 | -0.980578000 |
| 14 | 0.922667000  | -0.931738000 | 1.609320000  |
| 6  | 1.186444000  | -2.782896000 | 1.473586000  |
| 1  | 0.930623000  | -3.143820000 | 0.474258000  |
| 1  | 2.221563000  | -3.062798000 | 1.683047000  |
| 1  | 0.551831000  | -3.310681000 | 2.191401000  |
| 6  | 1.751354000  | -0.320562000 | 3.164365000  |
| 1  | 1.585130000  | 0.750665000  | 3.298860000  |
| 1  | 1.363801000  | -0.841087000 | 4.043496000  |
| 1  | 2.829867000  | -0.492475000 | 3.125789000  |
| 32 | 0.110921000  | 0.336773000  | -0.990469000 |
| 6  | 2.808706000  | 0.210035000  | -0.109439000 |
| 6  | 3.215315000  | 1.461853000  | -0.578026000 |
| 6  | 3.778558000  | -0.788450000 | 0.005255000  |
| 6  | 4.533686000  | 1.701567000  | -0.916239000 |
| 1  | 2.476730000  | 2.252540000  | -0.663308000 |
| 6  | 5.100932000  | -0.539598000 | -0.321098000 |
| 1  | 3.481475000  | -1.775918000 | 0.343137000  |
| 6  | 5.488733000  | 0.704766000  | -0.786771000 |
| 1  | 4.820305000  | 2.683665000  | -1.275830000 |
| 1  | 5.832423000  | -1.333687000 | -0.219044000 |
| 1  | 6.522578000  | 0.896889000  | -1.047363000 |
| 1  | 0.650229000  | 0.343443000  | -2.533436000 |
| 7  | 0.533762000  | -1.153021000 | -2.306328000 |

|   |              |              |              |
|---|--------------|--------------|--------------|
| 1 | -0.143804000 | -1.606162000 | -2.908243000 |
| 1 | 1.331813000  | -1.756496000 | -2.129087000 |

**5GeTS<sup>N-H</sup>** (T.E.= -3428.518791)

|    |              |              |              |
|----|--------------|--------------|--------------|
| 6  | 0.671103000  | -0.067570000 | 1.684714000  |
| 6  | 1.314064000  | -0.043465000 | 0.279979000  |
| 1  | 0.871743000  | -1.011873000 | 2.209547000  |
| 1  | 1.071255000  | 0.708198000  | 2.346255000  |
| 7  | -1.416053000 | -0.305869000 | 0.519661000  |
| 14 | 2.703539000  | -1.318555000 | 0.201503000  |
| 14 | 1.779732000  | 1.731632000  | -0.167709000 |
| 6  | 1.949783000  | -3.032969000 | 0.335385000  |
| 1  | 1.418931000  | -3.304607000 | -0.581211000 |
| 1  | 2.735736000  | -3.775912000 | 0.494437000  |
| 1  | 1.244796000  | -3.119132000 | 1.166720000  |
| 6  | 3.894960000  | -1.096159000 | 1.628525000  |
| 1  | 4.566413000  | -1.957677000 | 1.675059000  |
| 1  | 4.509205000  | -0.201107000 | 1.520971000  |
| 1  | 3.375195000  | -1.032564000 | 2.587446000  |
| 6  | 3.267035000  | 2.284026000  | 0.830973000  |
| 1  | 4.180041000  | 1.773629000  | 0.515571000  |
| 1  | 3.418009000  | 3.356268000  | 0.677490000  |
| 1  | 3.136190000  | 2.118257000  | 1.903033000  |
| 6  | 2.203573000  | 1.911286000  | -1.994942000 |
| 1  | 1.573272000  | 2.672457000  | -2.461303000 |
| 1  | 3.243441000  | 2.223436000  | -2.118153000 |
| 1  | 2.077384000  | 0.983751000  | -2.557375000 |
| 6  | 3.633797000  | -1.228555000 | -1.419887000 |
| 1  | 4.185374000  | -0.293307000 | -1.540502000 |
| 1  | 4.356454000  | -2.047109000 | -1.470330000 |
| 1  | 2.956727000  | -1.336112000 | -2.272277000 |
| 6  | 0.368477000  | 2.887188000  | 0.267207000  |
| 1  | -0.525107000 | 2.695142000  | -0.330272000 |
| 1  | 0.090308000  | 2.827037000  | 1.322460000  |
| 1  | 0.682839000  | 3.916121000  | 0.070905000  |
| 6  | -2.812698000 | -0.247739000 | 0.317908000  |
| 6  | -3.477451000 | -1.349983000 | -0.203769000 |
| 6  | -3.522042000 | 0.919459000  | 0.579581000  |
| 6  | -4.835283000 | -1.286615000 | -0.463871000 |
| 1  | -2.917578000 | -2.258279000 | -0.401771000 |

|    |              |              |              |
|----|--------------|--------------|--------------|
| 6  | -4.880854000 | 0.973223000  | 0.326543000  |
| 1  | -2.998630000 | 1.777070000  | 0.986027000  |
| 6  | -5.542491000 | -0.126353000 | -0.197055000 |
| 1  | -5.343515000 | -2.152463000 | -0.872401000 |
| 1  | -5.427296000 | 1.885353000  | 0.537749000  |
| 1  | -6.606405000 | -0.078011000 | -0.396557000 |
| 6  | -0.841055000 | 0.069216000  | 1.703038000  |
| 8  | -1.441517000 | 0.423583000  | 2.694746000  |
| 32 | -0.186141000 | -0.644382000 | -0.875776000 |
| 1  | -0.992940000 | -0.874637000 | -2.281605000 |
| 7  | -0.938512000 | 0.636066000  | -2.204555000 |
| 1  | -0.355795000 | 0.934374000  | -2.977709000 |
| 1  | -1.666729000 | 1.318861000  | -2.010172000 |

**8GeTS<sup>N-H</sup>** (T.E.= -2997.127166)

|    |              |              |              |
|----|--------------|--------------|--------------|
| 6  | -0.538280000 | 1.761765000  | 0.420046000  |
| 6  | 0.916360000  | 1.582092000  | 0.829689000  |
| 6  | 1.513451000  | 0.473673000  | -0.010468000 |
| 1  | -1.078539000 | 2.325150000  | 1.190463000  |
| 1  | -0.590685000 | 2.351207000  | -0.510481000 |
| 1  | 0.946379000  | 1.348960000  | 1.905998000  |
| 1  | 1.440312000  | 2.538593000  | 0.704122000  |
| 32 | 0.161494000  | -0.808724000 | -0.281991000 |
| 7  | -1.139803000 | 0.452202000  | 0.243863000  |
| 15 | 3.157083000  | 0.228683000  | -0.169555000 |
| 6  | 4.042924000  | 1.611983000  | -0.928039000 |
| 1  | 3.829056000  | 2.521819000  | -0.363947000 |
| 1  | 5.121315000  | 1.442691000  | -0.929891000 |
| 1  | 3.686476000  | 1.746924000  | -1.949468000 |
| 6  | 3.524592000  | -1.213470000 | -1.179903000 |
| 1  | 3.162686000  | -2.115584000 | -0.683678000 |
| 1  | 3.034047000  | -1.120932000 | -2.149111000 |
| 1  | 4.602882000  | -1.297092000 | -1.323796000 |
| 6  | 4.087144000  | -0.036340000 | 1.368424000  |
| 1  | 5.158101000  | -0.151448000 | 1.187629000  |
| 1  | 3.927302000  | 0.820216000  | 2.027008000  |
| 1  | 3.698540000  | -0.927504000 | 1.864832000  |
| 6  | -2.497135000 | 0.340543000  | 0.051798000  |
| 6  | -3.090958000 | -0.925186000 | -0.089408000 |
| 6  | -3.348457000 | 1.454717000  | 0.005114000  |

|   |              |              |              |
|---|--------------|--------------|--------------|
| 6 | -4.450790000 | -1.062802000 | -0.269126000 |
| 1 | -2.466650000 | -1.811813000 | -0.049513000 |
| 6 | -4.713880000 | 1.300957000  | -0.168141000 |
| 1 | -2.939208000 | 2.452696000  | 0.097519000  |
| 6 | -5.282760000 | 0.048061000  | -0.308588000 |
| 1 | -4.870162000 | -2.057735000 | -0.374936000 |
| 1 | -5.340545000 | 2.186209000  | -0.198251000 |
| 1 | -6.351505000 | -0.064531000 | -0.444101000 |
| 1 | -0.247707000 | -2.390831000 | -0.293861000 |
| 7 | -0.044853000 | -2.232944000 | 1.195695000  |
| 1 | 0.797640000  | -2.707699000 | 1.504323000  |
| 1 | -0.724454000 | -2.191142000 | 1.950886000  |

**9GeTS<sup>N-H</sup>** (T.E.= -2995.943007)

|    |              |              |              |
|----|--------------|--------------|--------------|
| 6  | -0.449012000 | -1.774827000 | 0.064845000  |
| 6  | 0.891349000  | -1.731980000 | 0.186468000  |
| 6  | 1.529872000  | -0.433191000 | 0.092781000  |
| 7  | -1.105095000 | -0.565988000 | -0.166017000 |
| 15 | 3.189437000  | -0.203677000 | -0.044150000 |
| 6  | 4.136291000  | -0.847698000 | 1.354807000  |
| 1  | 3.929568000  | -1.914353000 | 1.461469000  |
| 1  | 5.208398000  | -0.707678000 | 1.203349000  |
| 1  | 3.819688000  | -0.341441000 | 2.266891000  |
| 6  | 3.590282000  | 1.543162000  | -0.165641000 |
| 1  | 4.667299000  | 1.670299000  | -0.283941000 |
| 1  | 3.079695000  | 1.975335000  | -1.027816000 |
| 1  | 3.262376000  | 2.061213000  | 0.736504000  |
| 6  | 3.990625000  | -0.993399000 | -1.464185000 |
| 1  | 3.588166000  | -0.568458000 | -2.384426000 |
| 1  | 5.074630000  | -0.864096000 | -1.440011000 |
| 1  | 3.756206000  | -2.059790000 | -1.446356000 |
| 32 | 0.165099000  | 0.843091000  | -0.244955000 |
| 6  | -2.477499000 | -0.418049000 | -0.132224000 |
| 6  | -3.334551000 | -1.408603000 | 0.364498000  |
| 6  | -3.063126000 | 0.770363000  | -0.591376000 |
| 6  | -4.703670000 | -1.211708000 | 0.391545000  |
| 1  | -2.924657000 | -2.331046000 | 0.755809000  |
| 6  | -4.428908000 | 0.957959000  | -0.552525000 |
| 1  | -2.422909000 | 1.548401000  | -0.998475000 |
| 6  | -5.268821000 | -0.031783000 | -0.061416000 |



|   |              |              |              |
|---|--------------|--------------|--------------|
| 1 | -5.338238000 | -1.997981000 | 0.786646000  |
| 1 | -4.844361000 | 1.890529000  | -0.919012000 |
| 1 | -6.341463000 | 0.115772000  | -0.033313000 |
| 1 | -1.019901000 | -2.694128000 | 0.056608000  |
| 1 | 1.457201000  | -2.651816000 | 0.306620000  |
| 1 | 0.006993000  | 2.466866000  | -0.005424000 |
| 7 | -0.268692000 | 1.978404000  | 1.401605000  |
| 1 | 0.305956000  | 1.996487000  | 2.241766000  |
| 1 | -1.249855000 | 2.073739000  | 1.649355000  |

**14GeTS<sup>N-H</sup> (T.E.= -3191.295920)**

|    |              |              |              |
|----|--------------|--------------|--------------|
| 6  | 1.170319000  | 1.290853000  | 0.105922000  |
| 6  | 1.656027000  | -0.047585000 | -0.031905000 |
| 7  | -1.044262000 | 0.100026000  | -0.315173000 |
| 6  | -2.372350000 | -0.292307000 | -0.116835000 |
| 6  | -3.075383000 | 0.102277000  | 1.023029000  |
| 6  | -4.377917000 | -0.313150000 | 1.231220000  |
| 6  | -5.004445000 | -1.151635000 | 0.321926000  |
| 6  | -4.308814000 | -1.568498000 | -0.800971000 |
| 6  | -3.009832000 | -1.143640000 | -1.020620000 |
| 1  | -2.578195000 | 0.740235000  | 1.746305000  |
| 1  | -4.904936000 | 0.011387000  | 2.121709000  |
| 1  | -6.023167000 | -1.480077000 | 0.489932000  |
| 1  | -4.783722000 | -2.226000000 | -1.520704000 |
| 1  | -2.471012000 | -1.458392000 | -1.908967000 |
| 5  | -0.437811000 | 1.390375000  | -0.109690000 |
| 7  | -1.130633000 | 2.618204000  | -0.182861000 |
| 6  | -0.578086000 | 3.881629000  | 0.254891000  |
| 1  | -0.566848000 | 4.605507000  | -0.569527000 |
| 1  | -1.196301000 | 4.310580000  | 1.054440000  |
| 1  | 0.439383000  | 3.745424000  | 0.613107000  |
| 6  | -2.476282000 | 2.769317000  | -0.681253000 |
| 1  | -3.192934000 | 2.983476000  | 0.123301000  |
| 1  | -2.515365000 | 3.608800000  | -1.385088000 |
| 1  | -2.813244000 | 1.876244000  | -1.204100000 |
| 15 | 3.339980000  | -0.297062000 | 0.027478000  |
| 6  | 4.080207000  | 0.104774000  | 1.619620000  |
| 1  | 5.161479000  | -0.043297000 | 1.591931000  |
| 1  | 3.854122000  | 1.146262000  | 1.847652000  |
| 1  | 3.641171000  | -0.532256000 | 2.388131000  |

|    |              |              |              |
|----|--------------|--------------|--------------|
| 6  | 4.281276000  | 0.646177000  | -1.183502000 |
| 1  | 5.352285000  | 0.476440000  | -1.058629000 |
| 1  | 3.975633000  | 0.348657000  | -2.187034000 |
| 1  | 4.049622000  | 1.701237000  | -1.036532000 |
| 6  | 3.721684000  | -2.028299000 | -0.271883000 |
| 1  | 3.219261000  | -2.649628000 | 0.471953000  |
| 1  | 3.370871000  | -2.316329000 | -1.264012000 |
| 1  | 4.798539000  | -2.191827000 | -0.208630000 |
| 8  | 1.932528000  | 2.252921000  | 0.325875000  |
| 32 | 0.251179000  | -1.267867000 | -0.413563000 |
| 1  | 0.161256000  | -2.901467000 | -0.219142000 |
| 7  | -0.105124000 | -2.448161000 | 1.179691000  |
| 1  | 0.420443000  | -2.445768000 | 2.050870000  |
| 1  | -1.085207000 | -2.646712000 | 1.356910000  |

**IIa-TS<sup>N-H</sup> (T.E.= -1112.312055)**

|    |              |              |              |
|----|--------------|--------------|--------------|
| 6  | -0.003396000 | 2.467974000  | -0.036005000 |
| 6  | -1.196998000 | 1.853626000  | 0.075028000  |
| 1  | -0.014135000 | 3.548701000  | -0.101823000 |
| 14 | 0.044588000  | -0.604073000 | 0.382460000  |
| 6  | 2.411601000  | 2.636565000  | -0.198011000 |
| 6  | 1.315940000  | 1.870307000  | -0.044592000 |
| 1  | 3.415532000  | 2.235980000  | -0.191173000 |
| 1  | 2.295799000  | 3.703661000  | -0.329922000 |
| 6  | -2.607382000 | -0.147420000 | 0.142793000  |
| 6  | -3.312374000 | -0.163477000 | -1.057264000 |
| 6  | -3.132196000 | -0.811332000 | 1.244949000  |
| 6  | -4.530943000 | -0.811489000 | -1.145196000 |
| 1  | -2.887831000 | 0.336824000  | -1.922300000 |
| 6  | -4.345736000 | -1.472150000 | 1.149632000  |
| 1  | -2.576508000 | -0.799438000 | 2.176053000  |
| 6  | -5.051036000 | -1.470250000 | -0.041680000 |
| 1  | -5.072758000 | -0.811231000 | -2.084007000 |
| 1  | -4.745204000 | -1.985375000 | 2.016694000  |
| 1  | -6.002794000 | -1.983213000 | -0.112597000 |
| 7  | -1.334240000 | 0.475882000  | 0.227751000  |
| 6  | 2.661761000  | -0.142991000 | 0.092500000  |
| 6  | 3.331032000  | -0.457093000 | 1.266107000  |
| 6  | 3.236407000  | -0.460686000 | -1.132426000 |
| 6  | 4.565298000  | -1.084664000 | 1.216042000  |

|   |              |              |              |
|---|--------------|--------------|--------------|
| 1 | 2.869791000  | -0.202025000 | 2.214086000  |
| 6 | 4.471507000  | -1.083097000 | -1.180611000 |
| 1 | 2.701115000  | -0.202749000 | -2.040806000 |
| 6 | 5.138208000  | -1.395194000 | -0.005835000 |
| 1 | 5.081499000  | -1.330757000 | 2.136739000  |
| 1 | 4.915410000  | -1.327221000 | -2.138880000 |
| 1 | 6.104650000  | -1.884096000 | -0.043893000 |
| 7 | 1.382364000  | 0.481208000  | 0.137274000  |
| 6 | -2.448585000 | 2.667883000  | 0.115282000  |
| 1 | -3.083965000 | 2.498396000  | -0.756589000 |
| 1 | -3.048760000 | 2.416520000  | 0.994430000  |
| 1 | -2.202569000 | 3.727425000  | 0.153443000  |
| 1 | -0.371185000 | -2.173333000 | 0.206202000  |
| 7 | -0.172376000 | -1.730346000 | -1.088011000 |
| 1 | 0.655993000  | -2.254151000 | -1.354173000 |
| 1 | -0.807201000 | -1.623185000 | -1.879296000 |

Cartesian coordinates of the transition states involved in the activation of C – H bond of CH<sub>3</sub>Ph by CAASis (**1Si-5Si**, **8Si-9Si** and **14Si**) and CAAGes (**1Ge-5Ge**, **8Ge-9Ge** and **14Ge**), along with their total energies (in hartrees) including zero point vibrational correction.

**1SiTS<sup>C-H</sup>** (T.E.= -1781.754661)

|   |              |              |              |
|---|--------------|--------------|--------------|
| 7 | 0.761380000  | 0.550529000  | -0.419433000 |
| 1 | 0.020029000  | -2.972574000 | 1.186767000  |
| 6 | 1.925899000  | -2.096181000 | 0.652544000  |
| 6 | 2.029647000  | -2.489598000 | -0.679697000 |
| 1 | 1.133784000  | -2.797401000 | -1.214241000 |
| 6 | 3.245283000  | -2.458662000 | -1.331275000 |
| 1 | 3.308653000  | -2.758388000 | -2.370843000 |
| 6 | 4.383726000  | -2.034817000 | -0.658498000 |
| 1 | 5.336475000  | -1.997138000 | -1.173381000 |
| 6 | 4.296523000  | -1.655722000 | 0.668110000  |
| 1 | 5.178618000  | -1.315438000 | 1.197561000  |
| 6 | 3.072270000  | -1.680675000 | 1.316381000  |
| 1 | 2.998532000  | -1.358503000 | 2.350402000  |
| 1 | 0.711997000  | -1.907705000 | 2.410846000  |
| 1 | -0.285466000 | -1.574832000 | 0.042184000  |

|    |              |              |              |
|----|--------------|--------------|--------------|
| 6  | 0.612597000  | -2.068338000 | 1.337840000  |
| 14 | -0.282726000 | -0.178793000 | 0.813347000  |
| 6  | -1.858218000 | 0.019868000  | -0.288062000 |
| 6  | 0.165811000  | 0.591984000  | -1.741388000 |
| 6  | -1.232087000 | -0.040017000 | -1.701446000 |
| 1  | -1.138775000 | -1.087446000 | -2.006149000 |
| 1  | -1.870061000 | 0.445184000  | -2.449951000 |
| 1  | 0.782348000  | 0.053756000  | -2.475755000 |
| 1  | 0.112513000  | 1.637049000  | -2.084538000 |
| 6  | 1.958023000  | 1.203576000  | -0.200417000 |
| 6  | 2.777691000  | 1.624031000  | -1.254968000 |
| 6  | 2.398453000  | 1.476337000  | 1.104083000  |
| 6  | 3.979849000  | 2.267062000  | -1.008164000 |
| 1  | 2.484034000  | 1.429982000  | -2.278660000 |
| 6  | 3.592847000  | 2.121961000  | 1.337416000  |
| 1  | 1.778313000  | 1.171689000  | 1.942778000  |
| 6  | 4.403682000  | 2.521802000  | 0.283296000  |
| 1  | 4.593659000  | 2.571128000  | -1.849272000 |
| 1  | 3.895891000  | 2.318273000  | 2.360305000  |
| 1  | 5.343913000  | 3.026693000  | 0.468945000  |
| 14 | -3.114994000 | -1.358291000 | -0.020470000 |
| 14 | -2.506064000 | 1.759480000  | 0.126198000  |
| 6  | -3.291808000 | -1.784350000 | 1.795757000  |
| 1  | -4.035737000 | -2.577616000 | 1.911008000  |
| 1  | -2.351213000 | -2.150359000 | 2.215763000  |
| 1  | -3.612713000 | -0.934078000 | 2.399152000  |
| 6  | -4.797473000 | -0.913236000 | -0.721541000 |
| 1  | -5.468371000 | -1.770644000 | -0.618475000 |
| 1  | -5.266176000 | -0.062846000 | -0.222225000 |
| 1  | -4.722991000 | -0.680923000 | -1.787792000 |
| 6  | -2.618328000 | -2.935294000 | -0.915422000 |
| 1  | -3.347192000 | -3.708832000 | -0.655969000 |
| 1  | -2.644195000 | -2.815755000 | -2.000853000 |
| 1  | -1.629438000 | -3.311156000 | -0.642006000 |

|   |              |             |              |
|---|--------------|-------------|--------------|
| 6 | -3.526246000 | 2.416118000 | -1.306077000 |
| 1 | -4.328246000 | 1.740910000 | -1.608712000 |
| 1 | -3.978421000 | 3.368705000 | -1.016731000 |
| 1 | -2.894405000 | 2.607098000 | -2.177365000 |
| 6 | -3.534573000 | 1.761886000 | 1.692631000  |
| 1 | -3.825085000 | 2.793569000 | 1.909710000  |
| 1 | -4.447667000 | 1.168631000 | 1.621188000  |
| 1 | -2.953618000 | 1.398278000 | 2.544082000  |
| 6 | -1.140683000 | 3.016532000 | 0.406911000  |
| 1 | -0.464463000 | 2.741185000 | 1.220278000  |
| 1 | -0.535840000 | 3.190645000 | -0.485502000 |
| 1 | -1.612669000 | 3.966004000 | 0.678344000  |

**2SiTS<sup>C-H</sup>** (T.E.= -1780.562541)

|    |              |              |              |
|----|--------------|--------------|--------------|
| 7  | -0.690635000 | -0.726841000 | -0.466389000 |
| 1  | -0.083679000 | 2.675147000  | 1.457095000  |
| 6  | -1.988911000 | 1.852681000  | 0.848619000  |
| 6  | -2.125696000 | 2.488814000  | -0.382010000 |
| 1  | -1.248048000 | 2.910452000  | -0.864998000 |
| 6  | -3.357759000 | 2.566508000  | -1.000768000 |
| 1  | -3.450777000 | 3.067115000  | -1.957465000 |
| 6  | -4.471544000 | 1.992154000  | -0.404142000 |
| 1  | -5.436149000 | 2.038760000  | -0.896053000 |
| 6  | -4.345699000 | 1.351555000  | 0.815217000  |
| 1  | -5.209499000 | 0.891896000  | 1.280778000  |
| 6  | -3.110333000 | 1.280964000  | 1.435875000  |
| 1  | -3.006488000 | 0.767154000  | 2.386678000  |
| 1  | -0.769407000 | 1.487633000  | 2.568470000  |
| 1  | 0.213945000  | 1.394979000  | 0.143359000  |
| 6  | -0.672390000 | 1.759007000  | 1.518393000  |
| 14 | 0.320499000  | -0.032846000 | 0.849995000  |
| 6  | 1.909763000  | -0.059599000 | -0.276053000 |
| 6  | -0.012142000 | -0.612941000 | -1.674012000 |
| 6  | 1.279493000  | -0.261228000 | -1.629935000 |
| 6  | -1.963403000 | -1.282522000 | -0.357996000 |
| 6  | -2.899699000 | -1.205305000 | -1.390617000 |
| 6  | -2.338477000 | -1.930756000 | 0.822117000  |
| 6  | -4.156245000 | -1.765284000 | -1.244754000 |

|    |              |              |              |
|----|--------------|--------------|--------------|
| 1  | -2.653662000 | -0.668721000 | -2.299896000 |
| 6  | -3.596564000 | -2.481083000 | 0.961732000  |
| 1  | -1.622681000 | -1.995370000 | 1.636373000  |
| 6  | -4.518171000 | -2.407387000 | -0.072442000 |
| 1  | -4.868450000 | -1.682107000 | -2.058513000 |
| 1  | -3.857204000 | -2.981883000 | 1.887656000  |
| 1  | -5.504573000 | -2.841877000 | 0.035886000  |
| 14 | 2.925038000  | 1.522214000  | -0.172635000 |
| 14 | 2.812870000  | -1.666116000 | 0.182686000  |
| 6  | 3.188609000  | 2.055634000  | 1.605065000  |
| 1  | 3.675225000  | 3.034769000  | 1.621392000  |
| 1  | 2.245917000  | 2.146362000  | 2.150434000  |
| 1  | 3.822601000  | 1.359417000  | 2.156358000  |
| 6  | 4.601044000  | 1.301197000  | -0.984899000 |
| 1  | 5.121401000  | 2.262556000  | -1.007879000 |
| 1  | 5.235523000  | 0.592323000  | -0.448277000 |
| 1  | 4.502024000  | 0.953168000  | -2.016770000 |
| 6  | 2.076154000  | 2.928672000  | -1.080411000 |
| 1  | 2.802093000  | 3.730371000  | -1.244054000 |
| 1  | 1.696189000  | 2.612858000  | -2.054553000 |
| 1  | 1.242774000  | 3.355650000  | -0.517953000 |
| 6  | 3.973344000  | -2.185930000 | -1.196699000 |
| 1  | 4.765994000  | -1.462648000 | -1.393659000 |
| 1  | 4.445830000  | -3.133943000 | -0.924612000 |
| 1  | 3.420658000  | -2.348248000 | -2.125066000 |
| 6  | 3.777629000  | -1.473864000 | 1.776944000  |
| 1  | 4.180751000  | -2.446705000 | 2.071363000  |
| 1  | 4.618976000  | -0.783774000 | 1.682063000  |
| 1  | 3.134945000  | -1.122132000 | 2.588471000  |
| 6  | 1.608077000  | -3.081869000 | 0.422096000  |
| 1  | 1.001782000  | -2.964504000 | 1.323505000  |
| 1  | 0.937011000  | -3.204769000 | -0.430463000 |
| 1  | 2.182275000  | -4.006567000 | 0.532434000  |
| 1  | -0.533022000 | -0.861083000 | -2.591961000 |
| 1  | 1.872764000  | -0.190709000 | -2.536870000 |

**3SiTS<sup>C-H</sup>** (T.E.= -1901.857353)

|   |              |              |              |
|---|--------------|--------------|--------------|
| 7 | -0.622422000 | 0.774315000  | -0.073750000 |
| 1 | -0.161959000 | -3.111436000 | -0.867611000 |
| 6 | -2.040795000 | -2.202098000 | -0.278154000 |

|    |              |              |              |
|----|--------------|--------------|--------------|
| 6  | -2.055500000 | -2.345233000 | 1.106335000  |
| 1  | -1.114498000 | -2.422550000 | 1.645898000  |
| 6  | -3.249167000 | -2.373952000 | 1.800470000  |
| 1  | -3.243178000 | -2.491445000 | 2.877928000  |
| 6  | -4.452550000 | -2.245248000 | 1.121531000  |
| 1  | -5.389026000 | -2.257849000 | 1.667004000  |
| 6  | -4.449536000 | -2.084067000 | -0.252296000 |
| 1  | -5.383095000 | -1.962058000 | -0.789236000 |
| 6  | -3.250803000 | -2.060452000 | -0.945279000 |
| 1  | -3.248639000 | -1.910230000 | -2.020645000 |
| 1  | -0.997643000 | -2.221395000 | -2.127748000 |
| 1  | 0.113661000  | -1.552108000 | 0.100788000  |
| 6  | -0.773330000 | -2.226386000 | -1.059987000 |
| 14 | 0.346402000  | -0.408206000 | -1.006629000 |
| 6  | 1.945926000  | -0.205483000 | 0.067076000  |
| 6  | 1.384570000  | 0.382444000  | 1.392907000  |
| 6  | -1.932008000 | 1.086116000  | -0.464907000 |
| 6  | -2.960115000 | 1.160138000  | 0.475520000  |
| 6  | -2.252405000 | 1.292934000  | -1.806958000 |
| 6  | -4.254187000 | 1.449930000  | 0.088176000  |
| 1  | -2.726079000 | 0.975295000  | 1.518594000  |
| 6  | -3.551770000 | 1.573188000  | -2.192213000 |
| 1  | -1.463139000 | 1.231753000  | -2.550628000 |
| 6  | -4.562075000 | 1.657154000  | -1.247961000 |
| 1  | -5.035761000 | 1.497088000  | 0.838678000  |
| 1  | -3.773569000 | 1.734670000  | -3.241417000 |
| 1  | -5.579022000 | 1.878058000  | -1.549561000 |
| 14 | 2.889626000  | -1.810526000 | 0.326989000  |
| 14 | 2.921950000  | 1.140291000  | -0.852677000 |
| 6  | 3.039625000  | -2.805410000 | -1.255439000 |
| 1  | 3.541495000  | -3.753444000 | -1.041918000 |
| 1  | 2.061683000  | -3.039089000 | -1.684099000 |
| 1  | 3.617672000  | -2.286400000 | -2.020815000 |
| 6  | 4.607988000  | -1.492215000 | 1.013104000  |
| 1  | 5.078336000  | -2.446402000 | 1.265962000  |
| 1  | 5.263800000  | -0.974354000 | 0.310157000  |
| 1  | 4.555288000  | -0.896116000 | 1.928547000  |
| 6  | 2.058289000  | -2.927686000 | 1.590274000  |
| 1  | 2.706361000  | -3.796852000 | 1.737620000  |
| 1  | 1.934482000  | -2.444854000 | 2.562089000  |

|   |              |              |              |
|---|--------------|--------------|--------------|
| 1 | 1.082821000  | -3.301038000 | 1.270864000  |
| 6 | 4.141140000  | 1.983166000  | 0.301611000  |
| 1 | 4.795321000  | 1.286988000  | 0.828275000  |
| 1 | 4.770296000  | 2.662421000  | -0.280637000 |
| 1 | 3.616033000  | 2.585378000  | 1.048189000  |
| 6 | 3.838931000  | 0.458399000  | -2.338538000 |
| 1 | 4.289106000  | 1.294556000  | -2.881037000 |
| 1 | 4.642334000  | -0.232344000 | -2.074394000 |
| 1 | 3.160147000  | -0.053913000 | -3.025191000 |
| 6 | 1.824724000  | 2.526010000  | -1.493904000 |
| 1 | 1.066083000  | 2.182380000  | -2.201505000 |
| 1 | 1.319667000  | 3.064183000  | -0.687311000 |
| 1 | 2.465995000  | 3.240900000  | -2.018830000 |
| 5 | 0.117560000  | 1.288183000  | 1.052153000  |
| 1 | 1.044821000  | -0.434031000 | 2.049047000  |
| 1 | 2.171786000  | 0.911586000  | 1.941244000  |
| 7 | -0.151076000 | 2.508252000  | 1.721634000  |
| 6 | 0.488992000  | 2.876841000  | 2.960965000  |
| 1 | 1.082373000  | 2.056050000  | 3.359671000  |
| 1 | 1.145185000  | 3.748248000  | 2.831709000  |
| 1 | -0.258590000 | 3.144110000  | 3.718081000  |
| 6 | -1.014796000 | 3.557303000  | 1.235155000  |
| 1 | -0.489573000 | 4.518857000  | 1.288156000  |
| 1 | -1.298858000 | 3.391265000  | 0.197415000  |
| 1 | -1.934003000 | 3.651061000  | 1.828221000  |

**4SiTS<sup>C-H</sup>** (T.E.= -2111.771804)

|   |              |              |              |
|---|--------------|--------------|--------------|
| 7 | 0.780904000  | 0.576311000  | -0.377358000 |
| 1 | -0.012424000 | -3.076118000 | 0.820589000  |
| 6 | 1.886621000  | -2.095189000 | 0.913053000  |
| 6 | 2.370392000  | -2.631482000 | -0.275168000 |
| 1 | 1.677204000  | -3.111522000 | -0.960751000 |
| 6 | 3.715539000  | -2.552748000 | -0.587943000 |
| 1 | 4.079108000  | -2.972604000 | -1.518821000 |
| 6 | 4.594468000  | -1.935906000 | 0.287958000  |
| 1 | 5.647351000  | -1.864869000 | 0.041080000  |
| 6 | 4.123952000  | -1.405636000 | 1.478822000  |
| 1 | 4.806513000  | -0.916407000 | 2.163727000  |
| 6 | 2.778979000  | -1.479865000 | 1.785428000  |
| 1 | 2.403622000  | -1.043004000 | 2.706158000  |



|    |              |              |              |
|----|--------------|--------------|--------------|
| 1  | 0.242997000  | -2.149523000 | 2.298469000  |
| 1  | -0.315707000 | -1.556274000 | -0.062244000 |
| 6  | 0.447317000  | -2.173329000 | 1.230101000  |
| 14 | -0.313862000 | -0.188720000 | 0.787782000  |
| 6  | -2.029652000 | 0.069376000  | -0.111869000 |
| 6  | -1.745159000 | 0.442233000  | -1.600663000 |
| 6  | 1.994525000  | 1.171259000  | -0.015047000 |
| 6  | 3.085580000  | 1.151288000  | -0.885826000 |
| 6  | 2.166413000  | 1.801498000  | 1.220309000  |
| 6  | 4.288316000  | 1.742548000  | -0.543234000 |
| 1  | 2.990849000  | 0.635571000  | -1.836401000 |
| 6  | 3.371942000  | 2.382852000  | 1.563718000  |
| 1  | 1.339391000  | 1.819272000  | 1.923842000  |
| 6  | 4.444630000  | 2.361257000  | 0.685326000  |
| 1  | 5.116786000  | 1.702898000  | -1.241999000 |
| 1  | 3.472094000  | 2.863859000  | 2.530677000  |
| 1  | 5.388521000  | 2.818577000  | 0.956748000  |
| 14 | -3.080236000 | -1.488263000 | -0.021946000 |
| 14 | -2.755919000 | 1.580304000  | 0.765785000  |
| 6  | -3.101969000 | -2.272184000 | 1.682837000  |
| 1  | -3.776859000 | -3.132762000 | 1.655589000  |
| 1  | -2.125708000 | -2.635261000 | 2.008539000  |
| 1  | -3.472948000 | -1.585644000 | 2.445458000  |
| 6  | -4.862501000 | -1.143745000 | -0.496361000 |
| 1  | -5.381941000 | -2.092879000 | -0.655082000 |
| 1  | -5.397246000 | -0.600221000 | 0.285637000  |
| 1  | -4.931687000 | -0.564720000 | -1.420962000 |
| 6  | -2.484475000 | -2.798022000 | -1.235677000 |
| 1  | -3.100173000 | -3.691380000 | -1.094578000 |
| 1  | -2.606545000 | -2.481738000 | -2.274372000 |
| 1  | -1.440730000 | -3.092041000 | -1.099716000 |
| 6  | -4.291239000 | 2.239221000  | -0.097620000 |
| 1  | -5.169080000 | 1.614397000  | 0.071654000  |
| 1  | -4.511063000 | 3.233022000  | 0.303100000  |
| 1  | -4.156832000 | 2.345075000  | -1.176277000 |
| 6  | -3.223204000 | 1.223730000  | 2.544115000  |
| 1  | -3.490958000 | 2.162488000  | 3.036777000  |
| 1  | -4.089930000 | 0.560887000  | 2.605515000  |
| 1  | -2.401992000 | 0.772158000  | 3.105385000  |
| 6  | -1.517754000 | 2.991136000  | 0.738651000  |

|    |              |              |              |
|----|--------------|--------------|--------------|
| 1  | -0.594952000 | 2.768998000  | 1.278444000  |
| 1  | -1.245585000 | 3.268875000  | -0.283132000 |
| 1  | -1.974087000 | 3.867835000  | 1.207045000  |
| 14 | 0.104308000  | 0.579705000  | -1.980673000 |
| 1  | -2.186288000 | -0.284246000 | -2.294358000 |
| 1  | -2.208099000 | 1.402322000  | -1.863620000 |
| 6  | 0.489905000  | 2.170675000  | -2.879565000 |
| 1  | 1.515379000  | 2.207089000  | -3.250480000 |
| 1  | -0.179861000 | 2.282507000  | -3.736245000 |
| 1  | 0.341487000  | 3.029920000  | -2.220259000 |
| 6  | 0.624466000  | -0.881589000 | -3.028176000 |
| 1  | 0.070571000  | -0.869074000 | -3.971465000 |
| 1  | 1.690610000  | -0.869120000 | -3.266036000 |
| 1  | 0.399273000  | -1.827146000 | -2.528405000 |

**5SiTS<sup>C-H</sup>** (T.E.= -1855.825374)

|    |              |              |              |
|----|--------------|--------------|--------------|
| 7  | 0.673585000  | -0.680017000 | 0.445452000  |
| 1  | 0.107111000  | 2.947512000  | -1.054669000 |
| 6  | 2.008202000  | 1.996938000  | -0.717801000 |
| 6  | 2.266609000  | 2.534281000  | 0.539994000  |
| 1  | 1.448317000  | 2.953806000  | 1.119196000  |
| 6  | 3.547992000  | 2.526505000  | 1.055888000  |
| 1  | 3.738303000  | 2.948901000  | 2.035488000  |
| 6  | 4.587843000  | 1.975874000  | 0.321402000  |
| 1  | 5.591968000  | 1.964328000  | 0.728925000  |
| 6  | 4.339945000  | 1.432559000  | -0.927647000 |
| 1  | 5.147247000  | 0.991201000  | -1.499722000 |
| 6  | 3.055304000  | 1.436463000  | -1.440239000 |
| 1  | 2.853358000  | 0.993973000  | -2.411375000 |
| 1  | 0.642465000  | 1.896328000  | -2.366262000 |
| 1  | -0.229369000 | 1.526014000  | 0.026588000  |
| 6  | 0.644125000  | 2.026264000  | -1.285683000 |
| 14 | -0.321038000 | 0.159507000  | -0.801944000 |
| 6  | -1.936986000 | -0.006529000 | 0.247001000  |
| 6  | -1.348713000 | -0.217250000 | 1.653697000  |
| 6  | 1.945493000  | -1.252300000 | 0.204469000  |
| 6  | 2.966920000  | -1.162651000 | 1.142450000  |
| 6  | 2.192802000  | -1.890283000 | -1.006141000 |
| 6  | 4.208561000  | -1.707256000 | 0.869448000  |
| 1  | 2.783295000  | -0.655897000 | 2.080478000  |

|    |              |              |              |
|----|--------------|--------------|--------------|
| 6  | 3.438303000  | -2.427324000 | -1.277026000 |
| 1  | 1.398256000  | -1.957753000 | -1.742948000 |
| 6  | 4.452675000  | -2.341422000 | -0.338026000 |
| 1  | 4.997300000  | -1.626204000 | 1.608944000  |
| 1  | 3.612896000  | -2.921674000 | -2.225857000 |
| 1  | 5.428432000  | -2.764309000 | -0.546332000 |
| 14 | -3.016905000 | 1.533111000  | 0.110436000  |
| 14 | -2.757924000 | -1.614279000 | -0.356135000 |
| 6  | -3.067693000 | 2.163370000  | -1.654325000 |
| 1  | -3.742195000 | 3.022646000  | -1.705663000 |
| 1  | -2.090059000 | 2.494849000  | -2.012018000 |
| 1  | -3.436323000 | 1.409059000  | -2.351510000 |
| 6  | -4.776339000 | 1.229864000  | 0.681141000  |
| 1  | -5.308665000 | 2.185124000  | 0.698872000  |
| 1  | -5.334593000 | 0.552839000  | 0.031787000  |
| 1  | -4.795631000 | 0.822505000  | 1.695751000  |
| 6  | -2.387122000 | 2.920855000  | 1.208402000  |
| 1  | -3.004341000 | 3.803336000  | 1.016298000  |
| 1  | -2.493038000 | 2.676795000  | 2.268068000  |
| 1  | -1.346911000 | 3.202705000  | 1.031729000  |
| 6  | -4.055521000 | -2.200705000 | 0.864453000  |
| 1  | -4.875197000 | -1.494099000 | 0.998421000  |
| 1  | -4.479663000 | -3.136395000 | 0.488612000  |
| 1  | -3.624163000 | -2.414658000 | 1.844911000  |
| 6  | -3.551373000 | -1.391091000 | -2.036512000 |
| 1  | -3.879808000 | -2.367956000 | -2.401752000 |
| 1  | -4.427601000 | -0.739761000 | -2.005862000 |
| 1  | -2.845133000 | -0.985221000 | -2.765181000 |
| 6  | -1.506071000 | -3.004380000 | -0.494646000 |
| 1  | -0.792125000 | -2.845907000 | -1.306360000 |
| 1  | -0.940475000 | -3.164236000 | 0.427095000  |
| 1  | -2.048654000 | -3.928520000 | -0.714394000 |
| 1  | -1.991110000 | -0.820494000 | 2.303669000  |
| 6  | 0.016973000  | -0.885468000 | 1.635475000  |
| 8  | 0.438425000  | -1.522893000 | 2.575955000  |
| 1  | -1.195830000 | 0.739784000  | 2.171626000  |

**8SiTS<sup>C-H</sup>** (T.E.= -1424.429259)

|   |              |             |             |
|---|--------------|-------------|-------------|
| 6 | -1.824113000 | 1.701474000 | 1.113801000 |
| 6 | -0.338938000 | 1.990427000 | 1.364138000 |

|    |              |              |              |
|----|--------------|--------------|--------------|
| 6  | 0.447804000  | 1.372003000  | 0.233191000  |
| 1  | -2.385512000 | 1.735314000  | 2.057578000  |
| 1  | -2.238716000 | 2.484764000  | 0.460475000  |
| 1  | -0.054997000 | 1.567701000  | 2.340582000  |
| 1  | -0.207976000 | 3.077493000  | 1.435601000  |
| 14 | -0.409404000 | -0.190222000 | -0.159987000 |
| 7  | -1.975030000 | 0.404236000  | 0.466152000  |
| 15 | 1.870232000  | 1.938699000  | -0.423605000 |
| 6  | 1.859298000  | 3.727965000  | -0.702323000 |
| 1  | 1.686265000  | 4.242030000  | 0.244574000  |
| 1  | 2.816809000  | 4.059606000  | -1.108008000 |
| 1  | 1.055465000  | 3.984694000  | -1.392181000 |
| 6  | 3.415302000  | 1.711624000  | 0.510176000  |
| 1  | 3.600503000  | 0.640831000  | 0.625432000  |
| 1  | 4.266085000  | 2.176332000  | 0.005867000  |
| 1  | 3.303542000  | 2.151963000  | 1.502982000  |
| 6  | 2.242819000  | 1.165711000  | -2.005904000 |
| 1  | 2.478245000  | 0.111269000  | -1.848702000 |
| 1  | 1.384816000  | 1.247052000  | -2.672753000 |
| 1  | 3.108478000  | 1.656945000  | -2.453960000 |
| 6  | -3.223569000 | -0.028650000 | 0.099314000  |
| 6  | -3.381836000 | -1.243205000 | -0.591601000 |
| 6  | -4.390030000 | 0.697442000  | 0.388351000  |
| 6  | -4.625407000 | -1.688300000 | -0.986219000 |
| 1  | -2.501313000 | -1.835730000 | -0.821043000 |
| 6  | -5.632555000 | 0.234719000  | -0.009114000 |
| 1  | -4.324167000 | 1.634800000  | 0.925397000  |
| 6  | -5.769881000 | -0.956068000 | -0.700825000 |
| 1  | -4.703086000 | -2.627933000 | -1.523034000 |
| 1  | -6.511015000 | 0.825409000  | 0.229171000  |
| 1  | -6.746079000 | -1.311157000 | -1.007786000 |
| 1  | -0.008589000 | -0.614988000 | 1.357351000  |
| 6  | 0.157601000  | -2.080486000 | 0.606740000  |
| 1  | -0.337581000 | -2.712297000 | -0.133818000 |
| 1  | -0.175084000 | -2.417077000 | 1.590489000  |
| 6  | 1.631814000  | -2.131343000 | 0.466623000  |
| 6  | 2.218525000  | -2.403422000 | -0.765799000 |
| 6  | 2.455564000  | -1.898083000 | 1.562116000  |
| 6  | 3.594584000  | -2.455673000 | -0.897695000 |
| 1  | 1.577580000  | -2.570460000 | -1.626871000 |

|   |             |              |              |
|---|-------------|--------------|--------------|
| 6 | 3.834062000 | -1.951223000 | 1.434074000  |
| 1 | 2.003701000 | -1.673705000 | 2.523976000  |
| 6 | 4.407263000 | -2.227385000 | 0.203535000  |
| 1 | 4.036221000 | -2.677244000 | -1.862565000 |
| 1 | 4.462979000 | -1.775939000 | 2.299303000  |
| 1 | 5.485379000 | -2.268975000 | 0.102340000  |

**9SiTS<sup>C-H</sup>** (T.E.= -1423.239610)

|    |              |              |              |
|----|--------------|--------------|--------------|
| 7  | -2.007142000 | 0.429637000  | 0.420587000  |
| 14 | -0.438645000 | -0.209570000 | -0.188942000 |
| 6  | 0.385900000  | 1.424988000  | 0.131726000  |
| 6  | -1.763206000 | 1.619406000  | 1.129417000  |
| 6  | -0.530804000 | 2.146137000  | 0.993878000  |
| 6  | -3.272496000 | -0.029061000 | 0.128154000  |
| 6  | -3.443183000 | -1.298079000 | -0.443913000 |
| 6  | -4.426822000 | 0.729423000  | 0.370889000  |
| 6  | -4.697215000 | -1.776009000 | -0.765924000 |
| 1  | -2.567264000 | -1.909964000 | -0.636482000 |
| 6  | -5.678039000 | 0.233201000  | 0.056090000  |
| 1  | -4.338985000 | 1.726890000  | 0.782782000  |
| 6  | -5.832485000 | -1.020071000 | -0.514810000 |
| 1  | -4.788524000 | -2.760604000 | -1.212068000 |
| 1  | -6.549967000 | 0.848220000  | 0.252448000  |
| 1  | -6.816772000 | -1.400175000 | -0.759701000 |
| 15 | 1.863199000  | 2.010189000  | -0.401579000 |
| 6  | 1.754784000  | 3.703954000  | -1.026902000 |
| 1  | 1.323822000  | 4.336940000  | -0.249043000 |
| 1  | 2.740123000  | 4.089822000  | -1.294533000 |
| 1  | 1.096051000  | 3.726916000  | -1.894939000 |
| 6  | 3.191491000  | 2.135499000  | 0.828235000  |
| 1  | 3.410022000  | 1.138383000  | 1.214014000  |
| 1  | 4.097143000  | 2.569481000  | 0.398028000  |
| 1  | 2.849837000  | 2.762957000  | 1.653881000  |
| 6  | 2.559714000  | 1.002029000  | -1.714484000 |
| 1  | 2.825958000  | 0.015872000  | -1.328254000 |
| 1  | 1.828739000  | 0.883839000  | -2.515061000 |
| 1  | 3.457269000  | 1.485613000  | -2.103620000 |
| 1  | -2.529737000 | 2.010833000  | 1.786291000  |
| 1  | -0.253017000 | 3.047746000  | 1.534713000  |
| 1  | -0.018821000 | -0.503372000 | 1.335684000  |

|   |              |              |              |
|---|--------------|--------------|--------------|
| 6 | 0.181595000  | -2.071645000 | 0.651272000  |
| 1 | -0.095170000 | -2.324417000 | 1.674625000  |
| 1 | -0.356634000 | -2.739228000 | -0.022121000 |
| 6 | 1.640324000  | -2.110856000 | 0.426801000  |
| 6 | 2.158178000  | -2.561545000 | -0.785714000 |
| 6 | 2.524201000  | -1.684313000 | 1.412688000  |
| 6 | 3.523081000  | -2.608160000 | -0.997808000 |
| 1 | 1.470188000  | -2.872495000 | -1.566464000 |
| 6 | 3.892875000  | -1.724204000 | 1.200229000  |
| 1 | 2.127706000  | -1.319601000 | 2.355910000  |
| 6 | 4.396280000  | -2.185751000 | -0.004860000 |
| 1 | 3.910155000  | -2.972292000 | -1.942506000 |
| 1 | 4.569259000  | -1.397223000 | 1.982029000  |
| 1 | 5.466618000  | -2.220113000 | -0.170635000 |

**14SiTS<sup>C-H</sup>** (T.E.= -1618.593725)

|   |              |              |              |
|---|--------------|--------------|--------------|
| 6 | -0.306734000 | 1.950248000  | 0.142685000  |
| 6 | 0.644733000  | 1.027552000  | -0.389671000 |
| 7 | -1.706918000 | -0.179110000 | 0.081276000  |
| 6 | -2.830396000 | -0.891388000 | -0.331558000 |
| 6 | -2.835538000 | -2.287975000 | -0.338509000 |
| 6 | -3.934917000 | -2.997215000 | -0.790534000 |
| 6 | -5.064541000 | -2.335387000 | -1.240142000 |
| 6 | -5.072589000 | -0.948238000 | -1.238280000 |
| 6 | -3.974646000 | -0.235265000 | -0.798243000 |
| 1 | -1.964785000 | -2.819568000 | 0.031727000  |
| 1 | -3.907855000 | -4.081297000 | -0.781432000 |
| 1 | -5.926548000 | -2.890822000 | -1.589439000 |
| 1 | -5.943568000 | -0.411067000 | -1.597715000 |
| 1 | -3.983079000 | 0.849321000  | -0.821315000 |
| 5 | -1.655927000 | 1.175847000  | 0.612431000  |
| 7 | -2.613337000 | 1.726659000  | 1.480419000  |
| 6 | -2.627766000 | 3.122267000  | 1.865609000  |
| 1 | -3.584180000 | 3.583543000  | 1.589403000  |
| 1 | -2.519430000 | 3.224009000  | 2.952217000  |
| 1 | -1.817966000 | 3.654112000  | 1.370102000  |
| 6 | -3.672941000 | 0.975914000  | 2.109154000  |
| 1 | -3.693348000 | 1.194732000  | 3.182676000  |
| 1 | -4.657656000 | 1.237878000  | 1.700392000  |
| 1 | -3.528092000 | -0.095156000 | 1.981020000  |

|    |              |              |              |
|----|--------------|--------------|--------------|
| 15 | 2.051941000  | 1.645675000  | -1.126667000 |
| 6  | 3.202263000  | 2.427901000  | 0.018992000  |
| 1  | 4.063724000  | 2.835496000  | -0.513601000 |
| 1  | 2.678029000  | 3.228411000  | 0.541502000  |
| 1  | 3.536920000  | 1.681777000  | 0.742229000  |
| 6  | 1.720948000  | 2.892352000  | -2.386271000 |
| 1  | 2.658285000  | 3.297085000  | -2.773127000 |
| 1  | 1.155905000  | 2.435232000  | -3.199256000 |
| 1  | 1.125010000  | 3.685283000  | -1.936143000 |
| 6  | 2.989655000  | 0.359074000  | -1.954838000 |
| 1  | 3.384337000  | -0.349415000 | -1.225646000 |
| 1  | 2.340205000  | -0.176160000 | -2.649097000 |
| 1  | 3.818461000  | 0.810420000  | -2.503213000 |
| 8  | -0.131604000 | 3.185905000  | 0.146282000  |
| 14 | -0.044921000 | -0.704555000 | -0.322847000 |
| 1  | 0.359710000  | -0.530550000 | 1.218887000  |
| 6  | 0.757800000  | -2.142580000 | 0.989559000  |
| 1  | 0.396925000  | -2.181227000 | 2.019084000  |
| 1  | 0.415710000  | -3.050486000 | 0.488911000  |
| 6  | 2.231794000  | -2.012114000 | 0.910039000  |
| 6  | 2.953332000  | -2.744892000 | -0.027037000 |
| 6  | 2.920771000  | -1.156721000 | 1.764349000  |
| 6  | 4.331528000  | -2.643031000 | -0.095887000 |
| 1  | 2.417197000  | -3.398753000 | -0.708662000 |
| 6  | 4.299207000  | -1.047247000 | 1.692900000  |
| 1  | 2.364142000  | -0.570354000 | 2.489924000  |
| 6  | 5.009030000  | -1.790757000 | 0.763053000  |
| 1  | 4.879522000  | -3.228186000 | -0.825243000 |
| 1  | 4.822464000  | -0.381956000 | 2.370338000  |
| 1  | 6.088034000  | -1.707957000 | 0.708842000  |

**1GeTS<sup>C-H</sup>** (T.E.= -3569.223137)

|   |              |              |              |
|---|--------------|--------------|--------------|
| 7 | -0.819611000 | 0.634325000  | 0.466037000  |
| 1 | -0.158515000 | -2.892275000 | -1.406131000 |
| 6 | -2.034444000 | -2.114019000 | -0.627295000 |
| 6 | -2.007982000 | -2.635285000 | 0.665847000  |
| 1 | -1.063358000 | -2.978926000 | 1.080615000  |
| 6 | -3.153924000 | -2.681945000 | 1.430903000  |
| 1 | -3.115751000 | -3.083669000 | 2.436682000  |
| 6 | -4.352503000 | -2.199784000 | 0.919235000  |

|    |              |              |              |
|----|--------------|--------------|--------------|
| 1  | -5.248793000 | -2.218634000 | 1.527894000  |
| 6  | -4.395114000 | -1.688128000 | -0.364114000 |
| 1  | -5.323648000 | -1.302725000 | -0.768474000 |
| 6  | -3.242289000 | -1.646370000 | -1.130867000 |
| 1  | -3.274874000 | -1.229478000 | -2.132154000 |
| 1  | -1.012958000 | -1.756951000 | -2.477483000 |
| 1  | 0.245178000  | -1.567786000 | -0.046100000 |
| 6  | -0.810412000 | -2.021655000 | -1.441387000 |
| 6  | 1.865671000  | 0.036664000  | 0.368344000  |
| 6  | -0.174801000 | 0.720208000  | 1.754014000  |
| 6  | 1.163593000  | -0.020513000 | 1.737160000  |
| 1  | 0.978778000  | -1.066407000 | 2.004074000  |
| 1  | 1.805601000  | 0.394946000  | 2.524321000  |
| 1  | -0.803637000 | 0.291496000  | 2.548256000  |
| 1  | -0.016847000 | 1.777798000  | 2.025928000  |
| 6  | -1.991810000 | 1.311038000  | 0.250588000  |
| 6  | -2.740003000 | 1.866686000  | 1.301416000  |
| 6  | -2.502012000 | 1.478148000  | -1.049451000 |
| 6  | -3.939389000 | 2.513992000  | 1.057494000  |
| 1  | -2.391093000 | 1.771021000  | 2.321598000  |
| 6  | -3.693434000 | 2.130448000  | -1.278635000 |
| 1  | -1.940157000 | 1.081331000  | -1.891250000 |
| 6  | -4.435860000 | 2.650800000  | -0.226560000 |
| 1  | -4.494846000 | 2.918517000  | 1.897175000  |
| 1  | -4.049165000 | 2.235636000  | -2.298289000 |
| 1  | -5.374500000 | 3.159868000  | -0.408359000 |
| 14 | 3.078636000  | -1.387611000 | 0.129205000  |
| 14 | 2.560977000  | 1.761746000  | -0.027509000 |
| 6  | 3.281981000  | -1.813405000 | -1.684229000 |
| 1  | 4.004634000  | -2.627402000 | -1.788731000 |
| 1  | 2.336481000  | -2.156518000 | -2.114703000 |
| 1  | 3.633534000  | -0.973921000 | -2.285279000 |
| 6  | 4.749123000  | -0.982273000 | 0.883408000  |
| 1  | 5.411726000  | -1.846821000 | 0.788402000  |
| 1  | 5.243270000  | -0.129586000 | 0.413394000  |
| 1  | 4.644280000  | -0.764215000 | 1.950248000  |
| 6  | 2.507287000  | -2.955636000 | 0.991049000  |
| 1  | 3.246373000  | -3.735690000 | 0.785496000  |
| 1  | 2.446525000  | -2.840790000 | 2.075231000  |
| 1  | 1.539752000  | -3.315321000 | 0.631582000  |



|    |             |              |              |
|----|-------------|--------------|--------------|
| 6  | 3.522216000 | 2.388817000  | 1.457106000  |
| 1  | 4.293209000 | 1.692178000  | 1.791226000  |
| 1  | 4.008367000 | 3.333520000  | 1.199269000  |
| 1  | 2.852280000 | 2.584210000  | 2.298499000  |
| 6  | 3.663050000 | 1.724084000  | -1.542510000 |
| 1  | 4.013038000 | 2.740996000  | -1.740637000 |
| 1  | 4.541389000 | 1.085349000  | -1.436900000 |
| 1  | 3.102189000 | 1.393963000  | -2.421162000 |
| 6  | 1.245253000 | 3.048245000  | -0.393661000 |
| 1  | 0.650898000 | 2.809460000  | -1.279385000 |
| 1  | 0.559069000 | 3.210024000  | 0.439523000  |
| 1  | 1.757234000 | 3.995309000  | -0.591642000 |
| 32 | 0.268495000 | -0.135231000 | -0.900184000 |

**2GeTSC<sup>C-H</sup>** (T.E.= -3568.034593)

|   |              |              |              |
|---|--------------|--------------|--------------|
| 7 | 0.731493000  | -0.745670000 | 0.531204000  |
| 1 | 0.224366000  | 2.690840000  | -1.548837000 |
| 6 | 2.097927000  | 1.868588000  | -0.825439000 |
| 6 | 2.175555000  | 2.546390000  | 0.390431000  |
| 1 | 1.283518000  | 3.016872000  | 0.794937000  |
| 6 | 3.362900000  | 2.600981000  | 1.090440000  |
| 1 | 3.409512000  | 3.132918000  | 2.033415000  |
| 6 | 4.492336000  | 1.961547000  | 0.595539000  |
| 1 | 5.419703000  | 1.987809000  | 1.155825000  |
| 6 | 4.427082000  | 1.277685000  | -0.604983000 |
| 1 | 5.297814000  | 0.755856000  | -0.984020000 |
| 6 | 3.237218000  | 1.232137000  | -1.309191000 |
| 1 | 3.179117000  | 0.678288000  | -2.241199000 |
| 1 | 0.977373000  | 1.468589000  | -2.609010000 |
| 1 | -0.226645000 | 1.436027000  | -0.102978000 |
| 6 | 0.842577000  | 1.797274000  | -1.581616000 |
| 6 | -1.938186000 | -0.060391000 | 0.375385000  |
| 6 | 0.041968000  | -0.622273000 | 1.717251000  |
| 6 | -1.250987000 | -0.263713000 | 1.691216000  |
| 6 | 2.001207000  | -1.288284000 | 0.428977000  |
| 6 | 2.918117000  | -1.275349000 | 1.485111000  |
| 6 | 2.405010000  | -1.873276000 | -0.777624000 |
| 6 | 4.181878000  | -1.814154000 | 1.327816000  |
| 1 | 2.649809000  | -0.810672000 | 2.426748000  |
| 6 | 3.669914000  | -2.403259000 | -0.926471000 |

|    |              |              |              |
|----|--------------|--------------|--------------|
| 1  | 1.700390000  | -1.906727000 | -1.604239000 |
| 6  | 4.574958000  | -2.378245000 | 0.124993000  |
| 1  | 4.876251000  | -1.778649000 | 2.160475000  |
| 1  | 3.950281000  | -2.849769000 | -1.874340000 |
| 1  | 5.567994000  | -2.795330000 | 0.009400000  |
| 14 | -2.935685000 | 1.534645000  | 0.284418000  |
| 14 | -2.820688000 | -1.677095000 | -0.083442000 |
| 6  | -3.202556000 | 2.064396000  | -1.494016000 |
| 1  | -3.708174000 | 3.033659000  | -1.515270000 |
| 1  | -2.255152000 | 2.176883000  | -2.028727000 |
| 1  | -3.816198000 | 1.356051000  | -2.053145000 |
| 6  | -4.606997000 | 1.309470000  | 1.106655000  |
| 1  | -5.131102000 | 2.268368000  | 1.140157000  |
| 1  | -5.242311000 | 0.601061000  | 0.570089000  |
| 1  | -4.498455000 | 0.954385000  | 2.135254000  |
| 6  | -2.069890000 | 2.936108000  | 1.181706000  |
| 1  | -2.793677000 | 3.729860000  | 1.387616000  |
| 1  | -1.643728000 | 2.610067000  | 2.133050000  |
| 1  | -1.264271000 | 3.372381000  | 0.586210000  |
| 6  | -3.959570000 | -2.198351000 | 1.312753000  |
| 1  | -4.755505000 | -1.479302000 | 1.512669000  |
| 1  | -4.427412000 | -3.152453000 | 1.054397000  |
| 1  | -3.392738000 | -2.346522000 | 2.234777000  |
| 6  | -3.810110000 | -1.490759000 | -1.663449000 |
| 1  | -4.227479000 | -2.461895000 | -1.943117000 |
| 1  | -4.643636000 | -0.792777000 | -1.556645000 |
| 1  | -3.182029000 | -1.150168000 | -2.491101000 |
| 6  | -1.598730000 | -3.076102000 | -0.331404000 |
| 1  | -0.982552000 | -2.943704000 | -1.224379000 |
| 1  | -0.934097000 | -3.195513000 | 0.526760000  |
| 1  | -2.159656000 | -4.007123000 | -0.454929000 |
| 32 | -0.327367000 | -0.014853000 | -0.915858000 |
| 1  | -1.812543000 | -0.161661000 | 2.615774000  |
| 1  | 0.556013000  | -0.850873000 | 2.645267000  |

**3GeTS<sup>C-H</sup>** (T.E.= -3689.327728)

|   |              |              |              |
|---|--------------|--------------|--------------|
| 7 | -0.698908000 | 0.760293000  | 0.004171000  |
| 1 | -0.247485000 | -3.244491000 | -0.590259000 |
| 6 | -2.113101000 | -2.237972000 | -0.136534000 |
| 6 | -2.133153000 | -2.239453000 | 1.256066000  |

|    |              |              |              |
|----|--------------|--------------|--------------|
| 1  | -1.193807000 | -2.287544000 | 1.801729000  |
| 6  | -3.326664000 | -2.156603000 | 1.944588000  |
| 1  | -3.325181000 | -2.161951000 | 3.028351000  |
| 6  | -4.524342000 | -2.051781000 | 1.251389000  |
| 1  | -5.460332000 | -1.972927000 | 1.792177000  |
| 6  | -4.517520000 | -2.033574000 | -0.131768000 |
| 1  | -5.447001000 | -1.938595000 | -0.680839000 |
| 6  | -3.319467000 | -2.121100000 | -0.819210000 |
| 1  | -3.314270000 | -2.103866000 | -1.904382000 |
| 1  | -1.049857000 | -2.478938000 | -1.970351000 |
| 1  | 0.168716000  | -1.583040000 | 0.302496000  |
| 6  | -0.859353000 | -2.398833000 | -0.901286000 |
| 6  | 1.986572000  | -0.149714000 | 0.169727000  |
| 6  | 1.364454000  | 0.465705000  | 1.443212000  |
| 1  | 1.047168000  | -0.332463000 | 2.132330000  |
| 1  | 2.121579000  | 1.050918000  | 1.977963000  |
| 6  | -1.999524000 | 1.060675000  | -0.400437000 |
| 6  | -3.030480000 | 1.200221000  | 0.532084000  |
| 6  | -2.320057000 | 1.210515000  | -1.752324000 |
| 6  | -4.317404000 | 1.499912000  | 0.128739000  |
| 1  | -2.800790000 | 1.072495000  | 1.584727000  |
| 6  | -3.611980000 | 1.500973000  | -2.152840000 |
| 1  | -1.533334000 | 1.101738000  | -2.493600000 |
| 6  | -4.621521000 | 1.650978000  | -1.215813000 |
| 1  | -5.097511000 | 1.601475000  | 0.875747000  |
| 1  | -3.828812000 | 1.617810000  | -3.209108000 |
| 1  | -5.633212000 | 1.880180000  | -1.528671000 |
| 14 | 2.965407000  | -1.724665000 | 0.486399000  |
| 14 | 2.895102000  | 1.198165000  | -0.810392000 |
| 6  | 3.109565000  | -2.766430000 | -1.066095000 |
| 1  | 3.661075000  | -3.683960000 | -0.842742000 |
| 1  | 2.129893000  | -3.058916000 | -1.453529000 |
| 1  | 3.637014000  | -2.245370000 | -1.866518000 |
| 6  | 4.688876000  | -1.336385000 | 1.122879000  |
| 1  | 5.187793000  | -2.266983000 | 1.407072000  |
| 1  | 5.319080000  | -0.833388000 | 0.386519000  |
| 1  | 4.637777000  | -0.703750000 | 2.013558000  |
| 6  | 2.187025000  | -2.806982000 | 1.810104000  |
| 1  | 2.850603000  | -3.661966000 | 1.971023000  |
| 1  | 2.084749000  | -2.288169000 | 2.765773000  |

|    |              |              |              |
|----|--------------|--------------|--------------|
| 1  | 1.206996000  | -3.201044000 | 1.532168000  |
| 6  | 4.088390000  | 2.116880000  | 0.312866000  |
| 1  | 4.809781000  | 1.467270000  | 0.810416000  |
| 1  | 4.644802000  | 2.845690000  | -0.283262000 |
| 1  | 3.543369000  | 2.671121000  | 1.082329000  |
| 6  | 3.825432000  | 0.496974000  | -2.278660000 |
| 1  | 4.256101000  | 1.326456000  | -2.846459000 |
| 1  | 4.644400000  | -0.167732000 | -1.996407000 |
| 1  | 3.158454000  | -0.050331000 | -2.950001000 |
| 6  | 1.747104000  | 2.524898000  | -1.481837000 |
| 1  | 0.986386000  | 2.140383000  | -2.165370000 |
| 1  | 1.240438000  | 3.073589000  | -0.683511000 |
| 1  | 2.359572000  | 3.241050000  | -2.038548000 |
| 32 | 0.329516000  | -0.525767000 | -0.991569000 |
| 5  | 0.066522000  | 1.325240000  | 1.073366000  |
| 7  | -0.194026000 | 2.575035000  | 1.700704000  |
| 6  | -1.059647000 | 3.604836000  | 1.178416000  |
| 1  | -1.379754000 | 3.380962000  | 0.162166000  |
| 1  | -1.958992000 | 3.746657000  | 1.792346000  |
| 1  | -0.522198000 | 4.561499000  | 1.156665000  |
| 6  | 0.491629000  | 3.013931000  | 2.891284000  |
| 1  | 1.037444000  | 2.197963000  | 3.361287000  |
| 1  | 1.200823000  | 3.826340000  | 2.675985000  |
| 1  | -0.224200000 | 3.397849000  | 3.628611000  |

**4GeTS<sup>C-H</sup>** (T.E.= -3899.242269)

|   |             |              |              |
|---|-------------|--------------|--------------|
| 7 | 0.848274000 | -0.629077000 | 0.408556000  |
| 1 | 0.064589000 | 3.018821000  | -1.124388000 |
| 6 | 1.990640000 | 2.072624000  | -0.953676000 |
| 6 | 2.338560000 | 2.645906000  | 0.266485000  |
| 1 | 1.571260000 | 3.138081000  | 0.857321000  |
| 6 | 3.639485000 | 2.587554000  | 0.726709000  |
| 1 | 3.895282000 | 3.034298000  | 1.680653000  |
| 6 | 4.614694000 | 1.956603000  | -0.030810000 |
| 1 | 5.634395000 | 1.903622000  | 0.332462000  |
| 6 | 4.283337000 | 1.390385000  | -1.251312000 |
| 1 | 5.041375000 | 0.892352000  | -1.843952000 |
| 6 | 2.978493000 | 1.438206000  | -1.703275000 |
| 1 | 2.709889000 | 0.971842000  | -2.646648000 |
| 1 | 0.505786000 | 1.988323000  | -2.505753000 |

|    |              |              |              |
|----|--------------|--------------|--------------|
| 1  | -0.294761000 | 1.546960000  | -0.004304000 |
| 6  | 0.606542000  | 2.127649000  | -1.432661000 |
| 6  | -2.070666000 | -0.087298000 | 0.205812000  |
| 6  | -1.686565000 | -0.440007000 | 1.662739000  |
| 1  | -2.119862000 | 0.267141000  | 2.382286000  |
| 1  | -2.093446000 | -1.418951000 | 1.948400000  |
| 6  | 2.052248000  | -1.227619000 | 0.057220000  |
| 6  | 3.142946000  | -1.218370000 | 0.934160000  |
| 6  | 2.230759000  | -1.866063000 | -1.176253000 |
| 6  | 4.341701000  | -1.820868000 | 0.598766000  |
| 1  | 3.050587000  | -0.704459000 | 1.886155000  |
| 6  | 3.433677000  | -2.456438000 | -1.511672000 |
| 1  | 1.405373000  | -1.890371000 | -1.882000000 |
| 6  | 4.502736000  | -2.442353000 | -0.628250000 |
| 1  | 5.165449000  | -1.788372000 | 1.303799000  |
| 1  | 3.534073000  | -2.942040000 | -2.476524000 |
| 1  | 5.444344000  | -2.908061000 | -0.893044000 |
| 14 | -3.059821000 | 1.510003000  | 0.115113000  |
| 14 | -2.858291000 | -1.600187000 | -0.610903000 |
| 6  | -3.112224000 | 2.216380000  | -1.621794000 |
| 1  | -3.618636000 | 3.185371000  | -1.596260000 |
| 1  | -2.121236000 | 2.376559000  | -2.052191000 |
| 1  | -3.667077000 | 1.570878000  | -2.304463000 |
| 6  | -4.829889000 | 1.228567000  | 0.675349000  |
| 1  | -5.330327000 | 2.191663000  | 0.807670000  |
| 1  | -5.405096000 | 0.653655000  | -0.053664000 |
| 1  | -4.869659000 | 0.697085000  | 1.630121000  |
| 6  | -2.374931000 | 2.844056000  | 1.250194000  |
| 1  | -3.061756000 | 3.695260000  | 1.219044000  |
| 1  | -2.307364000 | 2.517446000  | 2.290582000  |
| 1  | -1.388461000 | 3.206082000  | 0.949821000  |
| 6  | -4.339616000 | -2.220823000 | 0.364863000  |
| 1  | -5.188923000 | -1.538217000 | 0.317209000  |
| 1  | -4.656038000 | -3.176862000 | -0.062078000 |
| 1  | -4.105470000 | -2.394076000 | 1.417382000  |
| 6  | -3.436235000 | -1.257448000 | -2.359975000 |
| 1  | -3.730729000 | -2.201604000 | -2.826492000 |
| 1  | -4.307474000 | -0.598043000 | -2.376439000 |
| 1  | -2.654640000 | -0.809845000 | -2.978403000 |
| 6  | -1.633505000 | -3.021883000 | -0.654387000 |

|    |              |              |              |
|----|--------------|--------------|--------------|
| 1  | -0.783512000 | -2.833857000 | -1.314116000 |
| 1  | -1.239374000 | -3.255994000 | 0.338000000  |
| 1  | -2.146192000 | -3.914466000 | -1.024207000 |
| 32 | -0.320298000 | 0.123037000  | -0.900717000 |
| 14 | 0.178397000  | -0.536737000 | 1.998683000  |
| 6  | 0.696987000  | 0.973526000  | 2.976215000  |
| 1  | 0.201735000  | 0.965332000  | 3.951646000  |
| 1  | 1.776283000  | 1.006999000  | 3.143393000  |
| 1  | 0.406137000  | 1.894334000  | 2.465786000  |
| 6  | 0.549349000  | -2.073850000 | 2.996464000  |
| 1  | -0.126175000 | -2.124957000 | 3.854785000  |
| 1  | 0.393891000  | -2.970229000 | 2.390268000  |
| 1  | 1.572249000  | -2.099064000 | 3.375242000  |

**5GeTSC<sup>C-H</sup>** (T.E.= -3643.295995)

|   |              |              |              |
|---|--------------|--------------|--------------|
| 7 | -0.731248000 | 0.737311000  | 0.475628000  |
| 1 | -0.216129000 | -2.882854000 | -1.282545000 |
| 6 | -2.099283000 | -1.991186000 | -0.697498000 |
| 6 | -2.218754000 | -2.562248000 | 0.567897000  |
| 1 | -1.336261000 | -2.974299000 | 1.050651000  |
| 6 | -3.438460000 | -2.592131000 | 1.212429000  |
| 1 | -3.519457000 | -3.040605000 | 2.195441000  |
| 6 | -4.557896000 | -2.039509000 | 0.604724000  |
| 1 | -5.514001000 | -2.053702000 | 1.114643000  |
| 6 | -4.449328000 | -1.460144000 | -0.647280000 |
| 1 | -5.319740000 | -1.024741000 | -1.123172000 |
| 6 | -3.225486000 | -1.429879000 | -1.291064000 |
| 1 | -3.134100000 | -0.964280000 | -2.267539000 |
| 1 | -0.916924000 | -1.755996000 | -2.469167000 |
| 1 | 0.217676000  | -1.524902000 | 0.004073000  |
| 6 | -0.815904000 | -1.984921000 | -1.411165000 |
| 6 | 1.954284000  | 0.022896000  | 0.330678000  |
| 6 | 1.279801000  | 0.202173000  | 1.694518000  |
| 1 | 1.087758000  | -0.766515000 | 2.176981000  |
| 1 | 1.900167000  | 0.774626000  | 2.392544000  |
| 6 | -1.998146000 | 1.304937000  | 0.237148000  |
| 6 | -3.007477000 | 1.282577000  | 1.196555000  |
| 6 | -2.268594000 | 1.875445000  | -1.004277000 |
| 6 | -4.250966000 | 1.815924000  | 0.910343000  |
| 1 | -2.809174000 | 0.845760000  | 2.165379000  |

|    |              |              |              |
|----|--------------|--------------|--------------|
| 6  | -3.515743000 | 2.402403000  | -1.286363000 |
| 1  | -1.486800000 | 1.901213000  | -1.757437000 |
| 6  | -4.515920000 | 2.376818000  | -0.328755000 |
| 1  | -5.026196000 | 1.785109000  | 1.667817000  |
| 1  | -3.702447000 | 2.841757000  | -2.259758000 |
| 1  | -5.493325000 | 2.791490000  | -0.545468000 |
| 14 | 2.999103000  | -1.543104000 | 0.195982000  |
| 14 | 2.797275000  | 1.637560000  | -0.215534000 |
| 6  | 3.081757000  | -2.131561000 | -1.581959000 |
| 1  | 3.722754000  | -3.015498000 | -1.639711000 |
| 1  | 2.100974000  | -2.415417000 | -1.972577000 |
| 1  | 3.497603000  | -1.374659000 | -2.249333000 |
| 6  | 4.747298000  | -1.277112000 | 0.818199000  |
| 1  | 5.265710000  | -2.239705000 | 0.842599000  |
| 1  | 5.330908000  | -0.603453000 | 0.187763000  |
| 1  | 4.746700000  | -0.875897000 | 1.835362000  |
| 6  | 2.307973000  | -2.941985000 | 1.239621000  |
| 1  | 2.939437000  | -3.820796000 | 1.079773000  |
| 1  | 2.338591000  | -2.709598000 | 2.306596000  |
| 1  | 1.282862000  | -3.221090000 | 0.984705000  |
| 6  | 4.066415000  | 2.174010000  | 1.056330000  |
| 1  | 4.882406000  | 1.460126000  | 1.174286000  |
| 1  | 4.498813000  | 3.124569000  | 0.731075000  |
| 1  | 3.614537000  | 2.343166000  | 2.036203000  |
| 6  | 3.638825000  | 1.440083000  | -1.875842000 |
| 1  | 3.994010000  | 2.419242000  | -2.208441000 |
| 1  | 4.503910000  | 0.774528000  | -1.833063000 |
| 1  | 2.951308000  | 1.062372000  | -2.637005000 |
| 6  | 1.554479000  | 3.033972000  | -0.359937000 |
| 1  | 0.855685000  | 2.886768000  | -1.187370000 |
| 1  | 0.970656000  | 3.178406000  | 0.552885000  |
| 1  | 2.100973000  | 3.961115000  | -0.555433000 |
| 32 | 0.324293000  | -0.123151000 | -0.901808000 |
| 6  | -0.076628000 | 0.895568000  | 1.660733000  |
| 8  | -0.486287000 | 1.509281000  | 2.627656000  |

**8GeTSC-H** (T.E.= -3211.890618)

|   |              |              |             |
|---|--------------|--------------|-------------|
| 6 | -0.785812000 | 0.686229000  | 2.121307000 |
| 6 | -1.950572000 | -0.313950000 | 2.128558000 |
| 6 | -2.376175000 | -0.705517000 | 0.728070000 |

|    |              |              |              |
|----|--------------|--------------|--------------|
| 7  | 0.134853000  | 0.412053000  | 1.035902000  |
| 15 | -3.527078000 | 0.247859000  | -0.068324000 |
| 6  | -5.081486000 | 0.299703000  | 0.850298000  |
| 1  | -4.916736000 | 0.762839000  | 1.824326000  |
| 1  | -5.825530000 | 0.884453000  | 0.306637000  |
| 1  | -5.446454000 | -0.716275000 | 0.999919000  |
| 6  | -3.926942000 | -0.431276000 | -1.686386000 |
| 1  | -4.700293000 | 0.171295000  | -2.165887000 |
| 1  | -3.033317000 | -0.428816000 | -2.313043000 |
| 1  | -4.274632000 | -1.457535000 | -1.570478000 |
| 6  | -3.207749000 | 2.011441000  | -0.413613000 |
| 1  | -2.284168000 | 2.098127000  | -0.991670000 |
| 1  | -4.026156000 | 2.481026000  | -0.964687000 |
| 1  | -3.067696000 | 2.538385000  | 0.532697000  |
| 32 | -0.681408000 | -0.787511000 | -0.241334000 |
| 6  | 1.098891000  | 1.338885000  | 0.740389000  |
| 6  | 1.354241000  | 2.453376000  | 1.560667000  |
| 6  | 1.894085000  | 1.209222000  | -0.411455000 |
| 6  | 2.339360000  | 3.370038000  | 1.234031000  |
| 1  | 0.784030000  | 2.598225000  | 2.468787000  |
| 6  | 2.871251000  | 2.128739000  | -0.724068000 |
| 1  | 1.743973000  | 0.349994000  | -1.056507000 |
| 6  | 3.109553000  | 3.226038000  | 0.093256000  |
| 1  | 2.504941000  | 4.215057000  | 1.894536000  |
| 1  | 3.463208000  | 1.978360000  | -1.621550000 |
| 1  | 3.881370000  | 3.945477000  | -0.151699000 |
| 1  | -1.197907000 | 1.704176000  | 2.006458000  |
| 1  | -1.630155000 | -1.219180000 | 2.660984000  |
| 1  | -0.359849000 | -1.975791000 | 0.908167000  |
| 6  | 0.447716000  | -2.682531000 | -0.530495000 |
| 1  | 0.075971000  | -2.879714000 | -1.532883000 |
| 1  | 0.202638000  | -3.523729000 | 0.111578000  |
| 6  | 1.872244000  | -2.318775000 | -0.501464000 |
| 6  | 2.537865000  | -1.995025000 | -1.681358000 |
| 6  | 2.578037000  | -2.291505000 | 0.697379000  |
| 6  | 3.879414000  | -1.662454000 | -1.664258000 |
| 1  | 1.985913000  | -1.996145000 | -2.616991000 |
| 6  | 3.917503000  | -1.950329000 | 0.716448000  |
| 1  | 2.058062000  | -2.521876000 | 1.622244000  |
| 6  | 4.571645000  | -1.634399000 | -0.463781000 |



|   |              |              |              |
|---|--------------|--------------|--------------|
| 1 | 4.385926000  | -1.415158000 | -2.590106000 |
| 1 | 4.453137000  | -1.923208000 | 1.657999000  |
| 1 | 5.619539000  | -1.359632000 | -0.447209000 |
| 1 | -2.767841000 | 0.124681000  | 2.717539000  |
| 1 | -0.270745000 | 0.667964000  | 3.092826000  |

**9GeTS<sup>C-H</sup>** (T.E.= -3210.702466)

|    |              |              |              |
|----|--------------|--------------|--------------|
| 6  | -0.517582000 | 0.688102000  | 1.690105000  |
| 6  | -1.721809000 | 0.090584000  | 1.793231000  |
| 6  | -2.323576000 | -0.537484000 | 0.608221000  |
| 7  | 0.103683000  | 0.721772000  | 0.451480000  |
| 15 | -3.807534000 | 0.086642000  | 0.072156000  |
| 6  | -5.043168000 | -0.001333000 | 1.383219000  |
| 1  | -4.728650000 | 0.625949000  | 2.218708000  |
| 1  | -6.008047000 | 0.355171000  | 1.018833000  |
| 1  | -5.134535000 | -1.031293000 | 1.727501000  |
| 6  | -4.463791000 | -0.839153000 | -1.321258000 |
| 1  | -5.418442000 | -0.415293000 | -1.637432000 |
| 1  | -3.756149000 | -0.786495000 | -2.151314000 |
| 1  | -4.596349000 | -1.882817000 | -1.036963000 |
| 6  | -3.885251000 | 1.823443000  | -0.465123000 |
| 1  | -3.257143000 | 1.949571000  | -1.349475000 |
| 1  | -4.903455000 | 2.143832000  | -0.697397000 |
| 1  | -3.481921000 | 2.448003000  | 0.335001000  |
| 32 | -0.878247000 | -0.435845000 | -0.750345000 |
| 6  | 1.286187000  | 1.372648000  | 0.186200000  |
| 6  | 2.183682000  | 1.770243000  | 1.188119000  |
| 6  | 1.635397000  | 1.663554000  | -1.141652000 |
| 6  | 3.358978000  | 2.423865000  | 0.866509000  |
| 1  | 1.972839000  | 1.536054000  | 2.224650000  |
| 6  | 2.809990000  | 2.315982000  | -1.449896000 |
| 1  | 0.954434000  | 1.367477000  | -1.935771000 |
| 6  | 3.689292000  | 2.706400000  | -0.449011000 |
| 1  | 4.035063000  | 2.709442000  | 1.665681000  |
| 1  | 3.041835000  | 2.525981000  | -2.488798000 |
| 1  | 4.611732000  | 3.220245000  | -0.690767000 |
| 1  | -0.035987000 | 1.172103000  | 2.531994000  |
| 1  | -2.240686000 | 0.090557000  | 2.748507000  |
| 1  | -0.449752000 | -1.648276000 | 0.313738000  |
| 6  | 0.566048000  | -2.018286000 | -1.193566000 |

|   |             |              |              |
|---|-------------|--------------|--------------|
| 1 | 0.699442000 | -1.819789000 | -2.256659000 |
| 1 | 0.076038000 | -2.982599000 | -1.071479000 |
| 6 | 1.840032000 | -1.868237000 | -0.455048000 |
| 6 | 2.965273000 | -1.383990000 | -1.112887000 |
| 6 | 1.954201000 | -2.205413000 | 0.891234000  |
| 6 | 4.176745000 | -1.256892000 | -0.453031000 |
| 1 | 2.886079000 | -1.096524000 | -2.156666000 |
| 6 | 3.158585000 | -2.081576000 | 1.552762000  |
| 1 | 1.070323000 | -2.537508000 | 1.429690000  |
| 6 | 4.275899000 | -1.603205000 | 0.882091000  |
| 1 | 5.039218000 | -0.868627000 | -0.982064000 |
| 1 | 3.226311000 | -2.345218000 | 2.601861000  |
| 1 | 5.218147000 | -1.490433000 | 1.405648000  |

**$^{14}\text{GeTS}^{\text{C-H}}$  (T.E.= -3406.060625)**

|    |              |              |              |
|----|--------------|--------------|--------------|
| 7  | -1.785412000 | 0.085321000  | -0.420288000 |
| 1  | 0.303305000  | -2.907610000 | -0.706024000 |
| 1  | 0.239748000  | -0.628760000 | 0.841914000  |
| 6  | 0.592258000  | -2.255230000 | 0.117014000  |
| 6  | 0.608660000  | 1.428422000  | -0.307039000 |
| 6  | -2.631261000 | -0.997512000 | -0.180481000 |
| 6  | -3.216700000 | -1.191424000 | 1.073594000  |
| 6  | -2.858972000 | -1.961037000 | -1.165838000 |
| 6  | -4.016774000 | -2.292003000 | 1.320800000  |
| 1  | -3.024669000 | -0.463633000 | 1.855600000  |
| 6  | -3.649912000 | -3.067060000 | -0.910086000 |
| 1  | -2.409555000 | -1.819221000 | -2.144485000 |
| 6  | -4.238089000 | -3.239151000 | 0.332890000  |
| 1  | -4.462045000 | -2.417600000 | 2.301763000  |
| 1  | -3.815194000 | -3.798225000 | -1.693888000 |
| 1  | -4.860643000 | -4.103531000 | 0.530679000  |
| 32 | 0.029124000  | -0.362899000 | -0.836166000 |
| 15 | 2.180200000  | 2.083638000  | -0.242980000 |
| 6  | 2.328884000  | 3.698731000  | -1.024243000 |
| 1  | 1.613123000  | 4.371321000  | -0.553753000 |
| 1  | 3.345164000  | 4.079919000  | -0.907176000 |
| 1  | 2.091113000  | 3.604640000  | -2.084265000 |
| 6  | 2.825825000  | 2.287561000  | 1.427930000  |
| 1  | 3.817841000  | 2.743396000  | 1.411968000  |
| 1  | 2.137475000  | 2.917456000  | 1.991576000  |

|   |              |              |              |
|---|--------------|--------------|--------------|
| 1 | 2.881707000  | 1.304181000  | 1.899349000  |
| 6 | 3.354235000  | 1.016597000  | -1.084178000 |
| 1 | 3.410587000  | 0.051447000  | -0.577784000 |
| 1 | 3.030953000  | 0.855727000  | -2.113749000 |
| 1 | 4.342331000  | 1.479867000  | -1.081287000 |
| 6 | -0.483975000 | 2.199778000  | 0.178821000  |
| 8 | -0.317632000 | 3.362929000  | 0.611594000  |
| 5 | -1.911399000 | 1.444994000  | 0.027595000  |
| 7 | -3.152626000 | 2.094059000  | 0.227547000  |
| 6 | -3.298868000 | 3.382615000  | 0.867248000  |
| 1 | -3.930629000 | 3.297747000  | 1.761645000  |
| 1 | -2.324163000 | 3.776705000  | 1.145706000  |
| 1 | -3.789559000 | 4.096328000  | 0.192925000  |
| 6 | -4.425107000 | 1.545129000  | -0.171081000 |
| 1 | -5.017651000 | 2.316365000  | -0.677050000 |
| 1 | -4.302116000 | 0.710021000  | -0.858897000 |
| 1 | -5.012059000 | 1.191914000  | 0.688187000  |
| 6 | 2.053627000  | -2.227316000 | 0.325353000  |
| 6 | 2.916371000  | -2.600479000 | -0.700929000 |
| 6 | 2.596301000  | -1.822300000 | 1.542363000  |
| 6 | 4.287647000  | -2.587922000 | -0.512047000 |
| 1 | 2.497938000  | -2.900842000 | -1.657126000 |
| 6 | 3.966437000  | -1.807553000 | 1.733075000  |
| 1 | 1.928472000  | -1.516991000 | 2.342757000  |
| 6 | 4.816359000  | -2.188919000 | 0.705391000  |
| 1 | 4.946048000  | -2.887183000 | -1.319118000 |
| 1 | 4.374306000  | -1.498351000 | 2.688626000  |
| 1 | 5.889604000  | -2.175430000 | 0.854324000  |
| 1 | 0.020683000  | -2.530735000 | 1.000181000  |

Cartesian coordinates of the van der Waals complexes involved in the activation of Si – H bond of SiEt<sub>3</sub>H by CAASis (**1Si-5Si**, **8Si-9Si** and **14Si**), CAAGes (**1Ge-5Ge**, **8Ge-9Ge** and **14Ge**) and **IX**, along with their total energies (in hartrees) including zero point vibrational correction.

**1Si<sub>v</sub>** (T.E.= -2038.010412)

|   |             |              |             |
|---|-------------|--------------|-------------|
| 6 | 0.531510000 | -1.523809000 | 1.691105000 |
| 6 | 2.004570000 | -1.229691000 | 1.490294000 |
| 6 | 2.193918000 | -0.315588000 | 0.253960000 |
| 1 | 0.385279000 | -2.460693000 | 2.240239000 |
| 1 | 0.045156000 | -0.732750000 | 2.279226000 |

|    |              |              |              |
|----|--------------|--------------|--------------|
| 1  | 2.521505000  | -2.185696000 | 1.337801000  |
| 1  | 2.437928000  | -0.802860000 | 2.403424000  |
| 7  | -0.072115000 | -1.615610000 | 0.365142000  |
| 14 | 0.723036000  | -0.696025000 | -0.892678000 |
| 14 | 2.201066000  | 1.513548000  | 0.714872000  |
| 14 | 3.740737000  | -0.864965000 | -0.681542000 |
| 6  | 4.202443000  | 0.288915000  | -2.082597000 |
| 1  | 4.537901000  | 1.269146000  | -1.736844000 |
| 1  | 5.023362000  | -0.157619000 | -2.650534000 |
| 1  | 3.367020000  | 0.437539000  | -2.772018000 |
| 6  | 3.423981000  | -2.555997000 | -1.440089000 |
| 1  | 2.707155000  | -2.498416000 | -2.264467000 |
| 1  | 4.355853000  | -2.961475000 | -1.843929000 |
| 1  | 3.038904000  | -3.275251000 | -0.712843000 |
| 6  | 5.202942000  | -1.045274000 | 0.478809000  |
| 1  | 6.026355000  | -1.527268000 | -0.055620000 |
| 1  | 5.561764000  | -0.083957000 | 0.849677000  |
| 1  | 4.961019000  | -1.670010000 | 1.341782000  |
| 6  | 1.791825000  | 2.602350000  | -0.753276000 |
| 1  | 1.885708000  | 3.652538000  | -0.462282000 |
| 1  | 2.439219000  | 2.431915000  | -1.614576000 |
| 1  | 0.759260000  | 2.441878000  | -1.076312000 |
| 6  | 0.903578000  | 1.881015000  | 2.021245000  |
| 1  | -0.096595000 | 1.598107000  | 1.684310000  |
| 1  | 1.101334000  | 1.378669000  | 2.971235000  |
| 1  | 0.896657000  | 2.958650000  | 2.213089000  |
| 6  | 3.842655000  | 2.052437000  | 1.445865000  |
| 1  | 4.649698000  | 2.065967000  | 0.710559000  |
| 1  | 3.736597000  | 3.066516000  | 1.841712000  |
| 1  | 4.146676000  | 1.403897000  | 2.271814000  |
| 6  | -1.368278000 | -2.133044000 | 0.264617000  |
| 6  | -2.207826000 | -2.241145000 | 1.374645000  |
| 6  | -1.861588000 | -2.554786000 | -0.974190000 |
| 6  | -3.496378000 | -2.732585000 | 1.241293000  |
| 1  | -1.863160000 | -1.925247000 | 2.351065000  |
| 6  | -3.147911000 | -3.036758000 | -1.098680000 |
| 1  | -1.213070000 | -2.511391000 | -1.842814000 |
| 6  | -3.980144000 | -3.128624000 | 0.007816000  |
| 1  | -4.128340000 | -2.798780000 | 2.120091000  |
| 1  | -3.502345000 | -3.355084000 | -2.072751000 |

|    |              |              |              |
|----|--------------|--------------|--------------|
| 1  | -4.987629000 | -3.514069000 | -0.091466000 |
| 14 | -2.590900000 | 1.756853000  | -0.103558000 |
| 6  | -4.005369000 | 0.666277000  | -0.671172000 |
| 1  | -3.969286000 | -0.233898000 | -0.043492000 |
| 1  | -4.951317000 | 1.164614000  | -0.428503000 |
| 6  | -3.969091000 | 0.268363000  | -2.139347000 |
| 1  | -4.713376000 | -0.498057000 | -2.370553000 |
| 1  | -4.166853000 | 1.121347000  | -2.792814000 |
| 1  | -2.991176000 | -0.138901000 | -2.418172000 |
| 6  | -2.256751000 | 3.253239000  | -1.188673000 |
| 1  | -3.161726000 | 3.868150000  | -1.250267000 |
| 1  | -1.528785000 | 3.860285000  | -0.633827000 |
| 6  | -1.720446000 | 2.944568000  | -2.580652000 |
| 1  | -2.488792000 | 2.507355000  | -3.220396000 |
| 1  | -1.349192000 | 3.840242000  | -3.084453000 |
| 1  | -0.895803000 | 2.225394000  | -2.545921000 |
| 6  | -2.896382000 | 2.326510000  | 1.659665000  |
| 1  | -2.099421000 | 3.023952000  | 1.941730000  |
| 1  | -3.821438000 | 2.915464000  | 1.659100000  |
| 6  | -2.989399000 | 1.193843000  | 2.670372000  |
| 1  | -3.178213000 | 1.555915000  | 3.683797000  |
| 1  | -3.790834000 | 0.493395000  | 2.419094000  |
| 1  | -2.058788000 | 0.617456000  | 2.700108000  |
| 1  | -1.345723000 | 0.929236000  | -0.136353000 |

**2Si<sub>v</sub>** (T.E.= -2036.820683)

|    |             |              |              |
|----|-------------|--------------|--------------|
| 6  | 2.236531000 | -0.078393000 | -0.235941000 |
| 6  | 2.090183000 | -0.907749000 | -1.461567000 |
| 6  | 1.047276000 | -1.744913000 | -1.466078000 |
| 1  | 2.774323000 | -0.840548000 | -2.302723000 |
| 1  | 0.799209000 | -2.431365000 | -2.267667000 |
| 7  | 0.264612000 | -1.742558000 | -0.311593000 |
| 14 | 2.087554000 | 1.758729000  | -0.665338000 |
| 14 | 3.826033000 | -0.588936000 | 0.656450000  |
| 6  | 3.693943000 | 2.474318000  | -1.313436000 |
| 1  | 3.510389000 | 3.495029000  | -1.661115000 |
| 1  | 4.483251000 | 2.516814000  | -0.559809000 |
| 1  | 4.063914000 | 1.897470000  | -2.165489000 |
| 6  | 1.524885000 | 2.767951000  | 0.810142000  |
| 1  | 2.169593000 | 2.635168000  | 1.680973000  |

|   |              |              |              |
|---|--------------|--------------|--------------|
| 1 | 1.528588000  | 3.829609000  | 0.546940000  |
| 1 | 0.506112000  | 2.502401000  | 1.106912000  |
| 6 | 0.832930000  | 1.959958000  | -2.042324000 |
| 1 | 0.581648000  | 3.018674000  | -2.157044000 |
| 1 | 1.235591000  | 1.604514000  | -2.993552000 |
| 1 | -0.090779000 | 1.411089000  | -1.844209000 |
| 6 | 4.193485000  | 0.529494000  | 2.113238000  |
| 1 | 5.080746000  | 0.157683000  | 2.633070000  |
| 1 | 4.393909000  | 1.562380000  | 1.818938000  |
| 1 | 3.368367000  | 0.533736000  | 2.830581000  |
| 6 | 3.628759000  | -2.342425000 | 1.295978000  |
| 1 | 2.953140000  | -2.394382000 | 2.154053000  |
| 1 | 3.239359000  | -3.001546000 | 0.515332000  |
| 1 | 4.597430000  | -2.737969000 | 1.613447000  |
| 6 | 5.289829000  | -0.603942000 | -0.510868000 |
| 1 | 5.133458000  | -1.313520000 | -1.326546000 |
| 1 | 5.506338000  | 0.373350000  | -0.943972000 |
| 1 | 6.175686000  | -0.929413000 | 0.042119000  |
| 6 | -0.977766000 | -2.398941000 | -0.279269000 |
| 6 | -1.744878000 | -2.562664000 | -1.431592000 |
| 6 | -1.491791000 | -2.852462000 | 0.934795000  |
| 6 | -2.987763000 | -3.168004000 | -1.367005000 |
| 1 | -1.379967000 | -2.186869000 | -2.380449000 |
| 6 | -2.741277000 | -3.440693000 | 0.993897000  |
| 1 | -0.893303000 | -2.746421000 | 1.833329000  |
| 6 | -3.497027000 | -3.606812000 | -0.156678000 |
| 1 | -3.570579000 | -3.278486000 | -2.274737000 |
| 1 | -3.121608000 | -3.785788000 | 1.948542000  |
| 1 | -4.472913000 | -4.074558000 | -0.109368000 |
| 6 | -2.471042000 | 3.098600000  | 0.041808000  |
| 1 | -1.933185000 | 3.547604000  | 0.885580000  |
| 1 | -1.848284000 | 3.291923000  | -0.839573000 |
| 6 | -3.771929000 | 0.414830000  | -0.804329000 |
| 1 | -3.819517000 | -0.644939000 | -0.524446000 |
| 1 | -4.769953000 | 0.826554000  | -0.618594000 |
| 6 | -2.801015000 | 0.796563000  | 2.117620000  |
| 1 | -2.821704000 | -0.298409000 | 2.182024000  |
| 1 | -1.917397000 | 1.110288000  | 2.685807000  |
| 6 | -4.065044000 | 1.394759000  | 2.717568000  |
| 1 | -4.953905000 | 1.114057000  | 2.144480000  |

|    |              |              |              |
|----|--------------|--------------|--------------|
| 1  | -4.227825000 | 1.068863000  | 3.747589000  |
| 1  | -4.020249000 | 2.487297000  | 2.728375000  |
| 6  | -3.392346000 | 0.555466000  | -2.271665000 |
| 1  | -4.099702000 | 0.052348000  | -2.936014000 |
| 1  | -3.344661000 | 1.604914000  | -2.578606000 |
| 1  | -2.404786000 | 0.121259000  | -2.460349000 |
| 6  | -3.835948000 | 3.753712000  | -0.125891000 |
| 1  | -3.758510000 | 4.836912000  | -0.245899000 |
| 1  | -4.356861000 | 3.368047000  | -1.005916000 |
| 1  | -4.485488000 | 3.568323000  | 0.734013000  |
| 1  | -1.184450000 | 0.703056000  | -0.076761000 |
| 14 | -2.518738000 | 1.236957000  | 0.318884000  |
| 14 | 0.816746000  | -0.593119000 | 0.923681000  |

**3Si<sub>v</sub>** (T.E.= -2158.109607)

|    |              |              |              |
|----|--------------|--------------|--------------|
| 6  | -2.630284000 | 0.893171000  | 0.583560000  |
| 6  | -2.188474000 | -0.419373000 | -0.119267000 |
| 1  | -3.510370000 | 1.326066000  | 0.084356000  |
| 1  | -2.979533000 | 0.713124000  | 1.608720000  |
| 14 | -0.629676000 | -0.032274000 | -1.130205000 |
| 7  | -0.361849000 | 1.504540000  | -0.316356000 |
| 5  | -1.470125000 | 1.971531000  | 0.503802000  |
| 7  | -1.590912000 | 3.253438000  | 1.086540000  |
| 6  | -2.678820000 | 3.581642000  | 1.979960000  |
| 1  | -2.294207000 | 4.016191000  | 2.910608000  |
| 1  | -3.353362000 | 4.321838000  | 1.530977000  |
| 1  | -3.262964000 | 2.701345000  | 2.239043000  |
| 6  | -0.769614000 | 4.417055000  | 0.834113000  |
| 1  | -0.184780000 | 4.698379000  | 1.719370000  |
| 1  | -0.078468000 | 4.259981000  | 0.010183000  |
| 1  | -1.408353000 | 5.270423000  | 0.578578000  |
| 14 | -3.522192000 | -1.011928000 | -1.301894000 |
| 14 | -1.690056000 | -1.659016000 | 1.211696000  |
| 6  | -3.612524000 | 0.217461000  | -2.722605000 |
| 1  | -3.661260000 | 1.250611000  | -2.366709000 |
| 1  | -2.734646000 | 0.128737000  | -3.369496000 |
| 1  | -4.496503000 | 0.037973000  | -3.340132000 |
| 6  | -5.210342000 | -1.061876000 | -0.486453000 |
| 1  | -5.453367000 | -0.115442000 | 0.002147000  |
| 1  | -5.974290000 | -1.248002000 | -1.246427000 |

|    |              |              |              |
|----|--------------|--------------|--------------|
| 1  | -5.281576000 | -1.853476000 | 0.261212000  |
| 6  | -3.183325000 | -2.349783000 | 2.113863000  |
| 1  | -3.754999000 | -3.042401000 | 1.491879000  |
| 1  | -2.843863000 | -2.900577000 | 2.995837000  |
| 1  | -3.860069000 | -1.561863000 | 2.453983000  |
| 6  | -0.694339000 | -3.102293000 | 0.547090000  |
| 1  | -0.282666000 | -3.670736000 | 1.387167000  |
| 1  | -1.301763000 | -3.784160000 | -0.050480000 |
| 1  | 0.145448000  | -2.774922000 | -0.071109000 |
| 6  | -3.145929000 | -2.698430000 | -2.026504000 |
| 1  | -3.252545000 | -3.496331000 | -1.287690000 |
| 1  | -3.840601000 | -2.910338000 | -2.843663000 |
| 1  | -2.130978000 | -2.744414000 | -2.430635000 |
| 6  | -0.636668000 | -0.795800000 | 2.509147000  |
| 1  | 0.283569000  | -0.383040000 | 2.086787000  |
| 1  | -1.169812000 | 0.013519000  | 3.013637000  |
| 1  | -0.353593000 | -1.527090000 | 3.272290000  |
| 6  | 0.896900000  | 2.136901000  | -0.420644000 |
| 6  | 1.387807000  | 2.580703000  | -1.642961000 |
| 6  | 1.673036000  | 2.316978000  | 0.723087000  |
| 6  | 2.608767000  | 3.231957000  | -1.712500000 |
| 1  | 0.787463000  | 2.432120000  | -2.534395000 |
| 6  | 2.887172000  | 2.973839000  | 0.651390000  |
| 1  | 1.290300000  | 1.957821000  | 1.674192000  |
| 6  | 3.358237000  | 3.441691000  | -0.566755000 |
| 1  | 2.973073000  | 3.583301000  | -2.671222000 |
| 1  | 3.472471000  | 3.118490000  | 1.552555000  |
| 1  | 4.308973000  | 3.958175000  | -0.622880000 |
| 1  | 1.600083000  | -0.797555000 | 0.217715000  |
| 14 | 3.009014000  | -1.276232000 | 0.106898000  |
| 6  | 3.929707000  | -0.220492000 | -1.135689000 |
| 1  | 4.996628000  | -0.465673000 | -1.072138000 |
| 1  | 3.841286000  | 0.823856000  | -0.816279000 |
| 6  | 3.774947000  | -1.135007000 | 1.814670000  |
| 1  | 4.855412000  | -1.302932000 | 1.743002000  |
| 1  | 3.655307000  | -0.093904000 | 2.138353000  |
| 6  | 2.973222000  | -3.065349000 | -0.462885000 |
| 1  | 2.420756000  | -3.662315000 | 0.270891000  |
| 1  | 2.390289000  | -3.121387000 | -1.389824000 |
| 6  | 3.425349000  | -0.380959000 | -2.562859000 |



|   |             |              |              |
|---|-------------|--------------|--------------|
| 1 | 2.352308000 | -0.173272000 | -2.629220000 |
| 1 | 3.931659000 | 0.296273000  | -3.255862000 |
| 1 | 3.579928000 | -1.398787000 | -2.931777000 |
| 6 | 3.148943000 | -2.085990000 | 2.824826000  |
| 1 | 3.359177000 | -3.129005000 | 2.573440000  |
| 1 | 3.516587000 | -1.918183000 | 3.839945000  |
| 1 | 2.059265000 | -1.978570000 | 2.852269000  |
| 6 | 4.369091000 | -3.635786000 | -0.674423000 |
| 1 | 4.347266000 | -4.684693000 | -0.979085000 |
| 1 | 4.910781000 | -3.085238000 | -1.448732000 |
| 1 | 4.970047000 | -3.576685000 | 0.238418000  |

**4Si<sub>v</sub>** (T.E.= -2368.023230)

|    |              |              |              |
|----|--------------|--------------|--------------|
| 6  | -2.291023000 | 0.444322000  | 1.520203000  |
| 6  | -2.215059000 | -0.169196000 | 0.086702000  |
| 1  | -3.080857000 | 1.204312000  | 1.586697000  |
| 1  | -2.558472000 | -0.299632000 | 2.280016000  |
| 14 | -0.732710000 | 0.477570000  | -0.933600000 |
| 7  | -0.025877000 | 1.456656000  | 0.316233000  |
| 14 | -3.702572000 | 0.470812000  | -0.898158000 |
| 14 | -2.142596000 | -2.052100000 | 0.145838000  |
| 6  | -3.476230000 | 2.320386000  | -1.163447000 |
| 1  | -2.680674000 | 2.533100000  | -1.883999000 |
| 1  | -4.397750000 | 2.759352000  | -1.555230000 |
| 1  | -3.230395000 | 2.840761000  | -0.233508000 |
| 6  | -5.314657000 | 0.239158000  | 0.032146000  |
| 1  | -6.098458000 | 0.797669000  | -0.487683000 |
| 1  | -5.619008000 | -0.807645000 | 0.070598000  |
| 1  | -5.266584000 | 0.614541000  | 1.056257000  |
| 6  | -3.804168000 | -2.835516000 | 0.529227000  |
| 1  | -4.507513000 | -2.760780000 | -0.303075000 |
| 1  | -3.652513000 | -3.897659000 | 0.741893000  |
| 1  | -4.269968000 | -2.382870000 | 1.408536000  |
| 6  | -1.489088000 | -2.798665000 | -1.446586000 |
| 1  | -1.532831000 | -3.889105000 | -1.366176000 |
| 1  | -2.058241000 | -2.503971000 | -2.329692000 |
| 1  | -0.445237000 | -2.522283000 | -1.622189000 |
| 6  | -3.879013000 | -0.332703000 | -2.581572000 |
| 1  | -4.099257000 | -1.400373000 | -2.509835000 |
| 1  | -4.707630000 | 0.139958000  | -3.116357000 |

|    |              |              |              |
|----|--------------|--------------|--------------|
| 1  | -2.977807000 | -0.212601000 | -3.187833000 |
| 6  | -0.970711000 | -2.603957000 | 1.501792000  |
| 1  | 0.022153000  | -2.169936000 | 1.361603000  |
| 1  | -1.317925000 | -2.348858000 | 2.505214000  |
| 1  | -0.864595000 | -3.692319000 | 1.456168000  |
| 14 | -0.683764000 | 1.320618000  | 1.938811000  |
| 6  | 0.424925000  | 0.358925000  | 3.100777000  |
| 1  | 0.856262000  | -0.522526000 | 2.619445000  |
| 1  | 1.244156000  | 0.982623000  | 3.466819000  |
| 1  | -0.144932000 | 0.020345000  | 3.970470000  |
| 6  | -0.947479000 | 3.027793000  | 2.643353000  |
| 1  | -1.583441000 | 3.625640000  | 1.985799000  |
| 1  | -1.420512000 | 2.981235000  | 3.627019000  |
| 1  | 0.005909000  | 3.550327000  | 2.757155000  |
| 6  | 1.097481000  | 2.261443000  | 0.030012000  |
| 6  | 2.305569000  | 2.086247000  | 0.703583000  |
| 6  | 1.021177000  | 3.244864000  | -0.954453000 |
| 6  | 3.403297000  | 2.870651000  | 0.395693000  |
| 1  | 2.388553000  | 1.307655000  | 1.454513000  |
| 6  | 2.125143000  | 4.018396000  | -1.267457000 |
| 1  | 0.075872000  | 3.398033000  | -1.465909000 |
| 6  | 3.321947000  | 3.836544000  | -0.594193000 |
| 1  | 4.335296000  | 2.715269000  | 0.928286000  |
| 1  | 2.045183000  | 4.775140000  | -2.039469000 |
| 1  | 4.184569000  | 4.445242000  | -0.837183000 |
| 1  | 1.553737000  | -0.890437000 | 0.193479000  |
| 14 | 2.716798000  | -1.616427000 | -0.394950000 |
| 6  | 2.754187000  | -1.298220000 | -2.241413000 |
| 1  | 3.477300000  | -1.983205000 | -2.699625000 |
| 1  | 1.774608000  | -1.586502000 | -2.641791000 |
| 6  | 4.275063000  | -0.990089000 | 0.443058000  |
| 1  | 4.146043000  | -1.088897000 | 1.527717000  |
| 1  | 4.360658000  | 0.084921000  | 0.250942000  |
| 6  | 2.482554000  | -3.447381000 | -0.043820000 |
| 1  | 3.206905000  | -4.016817000 | -0.637403000 |
| 1  | 1.496283000  | -3.739673000 | -0.424630000 |
| 6  | 3.068364000  | 0.144061000  | -2.612740000 |
| 1  | 4.068183000  | 0.437892000  | -2.280430000 |
| 1  | 3.023061000  | 0.309796000  | -3.691516000 |
| 1  | 2.361397000  | 0.838518000  | -2.147794000 |

|   |             |              |              |
|---|-------------|--------------|--------------|
| 6 | 5.526476000 | -1.721309000 | -0.021038000 |
| 1 | 5.668830000 | -1.620579000 | -1.101047000 |
| 1 | 6.431915000 | -1.344408000 | 0.460374000  |
| 1 | 5.467407000 | -2.792252000 | 0.193334000  |
| 6 | 2.611898000 | -3.796220000 | 1.432613000  |
| 1 | 2.353919000 | -4.837843000 | 1.638403000  |
| 1 | 3.632830000 | -3.637679000 | 1.789243000  |
| 1 | 1.958630000 | -3.173892000 | 2.052951000  |

**5Si<sub>v</sub>** (T.E.= -2112.069434)

|    |              |              |              |
|----|--------------|--------------|--------------|
| 6  | 2.485043000  | -1.259179000 | 1.100697000  |
| 6  | 2.307009000  | -0.086203000 | 0.125087000  |
| 1  | 3.254439000  | -1.963980000 | 0.757689000  |
| 1  | 2.804103000  | -0.972912000 | 2.108801000  |
| 14 | 0.768067000  | -0.476876000 | -0.910342000 |
| 7  | 0.348759000  | -1.811309000 | 0.178841000  |
| 14 | 3.760047000  | 0.006931000  | -1.077215000 |
| 14 | 1.982085000  | 1.502417000  | 1.105027000  |
| 6  | 3.695397000  | -1.518192000 | -2.172799000 |
| 1  | 2.859241000  | -1.467144000 | -2.876808000 |
| 1  | 4.612460000  | -1.604395000 | -2.761447000 |
| 1  | 3.589659000  | -2.440337000 | -1.594799000 |
| 6  | 5.400857000  | -0.003734000 | -0.174720000 |
| 1  | 6.208813000  | -0.129848000 | -0.900599000 |
| 1  | 5.579635000  | 0.925647000  | 0.368833000  |
| 1  | 5.469272000  | -0.828334000 | 0.538930000  |
| 6  | 3.561878000  | 2.152392000  | 1.873783000  |
| 1  | 4.237719000  | 2.586923000  | 1.133927000  |
| 1  | 3.315089000  | 2.933874000  | 2.597536000  |
| 1  | 4.103077000  | 1.364604000  | 2.404213000  |
| 6  | 1.223969000  | 2.855929000  | 0.052427000  |
| 1  | 1.034227000  | 3.728903000  | 0.683942000  |
| 1  | 1.875792000  | 3.171495000  | -0.764796000 |
| 1  | 0.266863000  | 2.555015000  | -0.383173000 |
| 6  | 3.654025000  | 1.517082000  | -2.176031000 |
| 1  | 3.857717000  | 2.441581000  | -1.631116000 |
| 1  | 4.393968000  | 1.436357000  | -2.976517000 |
| 1  | 2.668781000  | 1.606871000  | -2.641634000 |
| 6  | 0.802622000  | 1.124244000  | 2.514393000  |
| 1  | -0.173593000 | 0.780252000  | 2.163322000  |

|    |              |              |              |
|----|--------------|--------------|--------------|
| 1  | 1.201009000  | 0.370839000  | 3.198154000  |
| 1  | 0.639542000  | 2.039030000  | 3.091850000  |
| 6  | -0.891100000 | -2.496861000 | 0.091040000  |
| 6  | -1.290873000 | -3.031833000 | -1.126556000 |
| 6  | -1.737298000 | -2.588155000 | 1.190604000  |
| 6  | -2.522721000 | -3.653522000 | -1.245080000 |
| 1  | -0.623194000 | -2.964821000 | -1.979067000 |
| 6  | -2.959329000 | -3.223330000 | 1.069294000  |
| 1  | -1.434767000 | -2.156450000 | 2.136528000  |
| 6  | -3.358251000 | -3.757130000 | -0.146204000 |
| 1  | -2.824041000 | -4.066764000 | -2.200486000 |
| 1  | -3.612391000 | -3.290362000 | 1.931758000  |
| 1  | -4.319380000 | -4.249299000 | -0.236237000 |
| 6  | 1.227265000  | -2.084412000 | 1.226299000  |
| 8  | 1.041540000  | -2.899733000 | 2.094604000  |
| 1  | -1.324029000 | 0.467712000  | 0.289101000  |
| 14 | -2.537129000 | 1.257480000  | -0.085515000 |
| 6  | -2.305280000 | 1.823462000  | -1.863508000 |
| 1  | -2.509254000 | 0.962639000  | -2.512487000 |
| 1  | -1.241065000 | 2.042492000  | -2.008092000 |
| 6  | -4.011597000 | 0.108772000  | 0.078647000  |
| 1  | -4.201408000 | -0.057806000 | 1.145919000  |
| 1  | -3.688750000 | -0.863850000 | -0.312204000 |
| 6  | -5.281736000 | 0.553652000  | -0.632961000 |
| 1  | -6.089718000 | -0.171301000 | -0.508277000 |
| 1  | -5.649002000 | 1.515015000  | -0.262994000 |
| 1  | -5.113627000 | 0.664785000  | -1.707426000 |
| 6  | -3.142734000 | 3.025529000  | -2.276476000 |
| 1  | -2.966833000 | 3.307267000  | -3.317297000 |
| 1  | -4.213940000 | 2.835098000  | -2.169068000 |
| 1  | -2.907854000 | 3.898987000  | -1.662068000 |
| 6  | -2.608148000 | 2.700391000  | 1.121713000  |
| 1  | -1.858556000 | 3.440660000  | 0.815691000  |
| 1  | -2.262289000 | 2.318731000  | 2.089458000  |
| 6  | -3.973044000 | 3.354359000  | 1.286951000  |
| 1  | -3.951039000 | 4.165469000  | 2.018588000  |
| 1  | -4.341209000 | 3.774860000  | 0.347692000  |
| 1  | -4.717782000 | 2.630627000  | 1.628975000  |

8Si<sub>v</sub> (T.E.= -1680.699519)

|    |              |              |              |
|----|--------------|--------------|--------------|
| 6  | -0.439447000 | -1.688363000 | -1.596725000 |
| 6  | -1.953744000 | -1.668866000 | -1.474517000 |
| 6  | -2.268411000 | -0.906823000 | -0.201718000 |
| 1  | -0.093318000 | -2.529012000 | -2.209789000 |
| 1  | -0.099557000 | -0.761861000 | -2.091939000 |
| 1  | -2.334088000 | -2.699468000 | -1.426314000 |
| 1  | -2.386523000 | -1.222569000 | -2.379496000 |
| 14 | -0.908287000 | -0.954274000 | 0.971033000  |
| 7  | 0.114372000  | -1.762564000 | -0.252064000 |
| 15 | -3.786653000 | -0.236859000 | 0.080738000  |
| 6  | -4.323217000 | 0.961288000  | -1.165512000 |
| 1  | -4.307777000 | 0.491839000  | -2.150495000 |
| 1  | -5.335709000 | 1.312950000  | -0.957933000 |
| 1  | -3.636080000 | 1.808672000  | -1.172499000 |
| 6  | -5.155189000 | -1.422321000 | 0.110482000  |
| 1  | -4.995947000 | -2.129375000 | 0.925398000  |
| 1  | -6.118130000 | -0.923598000 | 0.236536000  |
| 1  | -5.161512000 | -1.975377000 | -0.831329000 |
| 6  | -3.864334000 | 0.642767000  | 1.646571000  |
| 1  | -3.644541000 | -0.035675000 | 2.470968000  |
| 1  | -3.133526000 | 1.452856000  | 1.649262000  |
| 1  | -4.864787000 | 1.058369000  | 1.777799000  |
| 6  | 1.484545000  | -1.926103000 | -0.110261000 |
| 6  | 2.374500000  | -1.822673000 | -1.185928000 |
| 6  | 2.030135000  | -2.183141000 | 1.156220000  |
| 6  | 3.741749000  | -1.937811000 | -0.991377000 |
| 1  | 2.001116000  | -1.628956000 | -2.183611000 |
| 6  | 3.392394000  | -2.288035000 | 1.340215000  |
| 1  | 1.358220000  | -2.296731000 | 2.000586000  |
| 6  | 4.267057000  | -2.161204000 | 0.268455000  |
| 1  | 4.403590000  | -1.840206000 | -1.845465000 |
| 1  | 3.778386000  | -2.477443000 | 2.336149000  |
| 1  | 5.336930000  | -2.247499000 | 0.414540000  |
| 1  | 0.767003000  | 0.762600000  | -0.560076000 |
| 14 | 1.447163000  | 1.967379000  | -0.015925000 |
| 6  | 2.208974000  | 2.857094000  | -1.484656000 |
| 1  | 1.408338000  | 3.190241000  | -2.153990000 |
| 1  | 2.709348000  | 3.766127000  | -1.131765000 |
| 6  | 2.801621000  | 1.452425000  | 1.181012000  |

|   |              |             |              |
|---|--------------|-------------|--------------|
| 1 | 3.570548000  | 2.234386000 | 1.182311000  |
| 1 | 3.281519000  | 0.558196000 | 0.763003000  |
| 6 | 0.101409000  | 2.996893000 | 0.799708000  |
| 1 | 0.504276000  | 3.963471000 | 1.121188000  |
| 1 | -0.211514000 | 2.477587000 | 1.713003000  |
| 6 | 2.330460000  | 1.166134000 | 2.599283000  |
| 1 | 1.525778000  | 0.424151000 | 2.608376000  |
| 1 | 3.137860000  | 0.778092000 | 3.225958000  |
| 1 | 1.943622000  | 2.066804000 | 3.083637000  |
| 6 | 3.187909000  | 1.964449000 | -2.236176000 |
| 1 | 3.602570000  | 2.450560000 | -3.122770000 |
| 1 | 4.028930000  | 1.672412000 | -1.600846000 |
| 1 | 2.704645000  | 1.037751000 | -2.562310000 |
| 6 | -1.093790000 | 3.181565000 | -0.125160000 |
| 1 | -1.471179000 | 2.206452000 | -0.457148000 |
| 1 | -1.920222000 | 3.713666000 | 0.355818000  |
| 1 | -0.829083000 | 3.744295000 | -1.024385000 |

**9Si<sub>v</sub>** (T.E.= -1679.521595)

|    |              |              |              |
|----|--------------|--------------|--------------|
| 6  | 0.426605000  | -1.657788000 | -1.567444000 |
| 6  | 1.712585000  | -1.242961000 | -1.539022000 |
| 6  | 2.198253000  | -0.975699000 | -0.210600000 |
| 14 | 0.905557000  | -1.279984000 | 1.038363000  |
| 7  | -0.174616000 | -1.759667000 | -0.324043000 |
| 15 | 3.747764000  | -0.336668000 | 0.064736000  |
| 6  | 5.097248000  | -1.427129000 | -0.431199000 |
| 1  | 4.978913000  | -1.678384000 | -1.486902000 |
| 1  | 6.066070000  | -0.946535000 | -0.282076000 |
| 1  | 5.046511000  | -2.347562000 | 0.151213000  |
| 6  | 4.021790000  | 0.048899000  | 1.795666000  |
| 1  | 5.034516000  | 0.434071000  | 1.924097000  |
| 1  | 3.303080000  | 0.802748000  | 2.120087000  |
| 1  | 3.896382000  | -0.847043000 | 2.404027000  |
| 6  | 4.063353000  | 1.191042000  | -0.842944000 |
| 1  | 3.361087000  | 1.958196000  | -0.512576000 |
| 1  | 5.087395000  | 1.534635000  | -0.686764000 |
| 1  | 3.900882000  | 1.011718000  | -1.907355000 |
| 6  | -1.530014000 | -2.104822000 | -0.203878000 |
| 6  | -1.993490000 | -2.700005000 | 0.970481000  |
| 6  | -2.450690000 | -1.854368000 | -1.221919000 |

|    |              |              |              |
|----|--------------|--------------|--------------|
| 6  | -3.328813000 | -3.019941000 | 1.124062000  |
| 1  | -1.285543000 | -2.917744000 | 1.762893000  |
| 6  | -3.782619000 | -2.198652000 | -1.069623000 |
| 1  | -2.127871000 | -1.360110000 | -2.130073000 |
| 6  | -4.234929000 | -2.778446000 | 0.103164000  |
| 1  | -3.661129000 | -3.479105000 | 2.048386000  |
| 1  | -4.477299000 | -1.993241000 | -1.876597000 |
| 1  | -5.279566000 | -3.040486000 | 0.220674000  |
| 1  | -0.117762000 | -1.946113000 | -2.457549000 |
| 1  | 2.299948000  | -1.149050000 | -2.448362000 |
| 1  | -1.575898000 | 0.952477000  | -1.557509000 |
| 14 | -1.373633000 | 1.979480000  | -0.500083000 |
| 6  | -2.093966000 | 1.350314000  | 1.115641000  |
| 1  | -1.538641000 | 0.451850000  | 1.415514000  |
| 1  | -1.899277000 | 2.092032000  | 1.899176000  |
| 6  | -2.266900000 | 3.545744000  | -1.038680000 |
| 1  | -1.859557000 | 3.842598000  | -2.011656000 |
| 1  | -3.322230000 | 3.311776000  | -1.215956000 |
| 6  | 0.473334000  | 2.319892000  | -0.333446000 |
| 1  | 0.746852000  | 3.074266000  | -1.081337000 |
| 1  | 0.995236000  | 1.398109000  | -0.618684000 |
| 6  | -2.134888000 | 4.688355000  | -0.041881000 |
| 1  | -1.085837000 | 4.952807000  | 0.122082000  |
| 1  | -2.647270000 | 5.594293000  | -0.375175000 |
| 1  | -2.554280000 | 4.420841000  | 0.932824000  |
| 6  | 0.920180000  | 2.754950000  | 1.055553000  |
| 1  | 1.987156000  | 3.001139000  | 1.091745000  |
| 1  | 0.379979000  | 3.638669000  | 1.406831000  |
| 1  | 0.746399000  | 1.960500000  | 1.787857000  |
| 6  | -3.582308000 | 1.050024000  | 1.024894000  |
| 1  | -4.159874000 | 1.953955000  | 0.809566000  |
| 1  | -3.792576000 | 0.330742000  | 0.227582000  |
| 1  | -3.975275000 | 0.626245000  | 1.952417000  |

**14Si<sub>v</sub>** (T.E.= -1874.856906)

|   |              |             |              |
|---|--------------|-------------|--------------|
| 6 | -2.029393000 | 1.416152000 | -0.313233000 |
| 6 | -2.127757000 | 0.363244000 | 0.666468000  |
| 7 | 0.208044000  | 1.499366000 | 0.838772000  |
| 6 | 1.610486000  | 1.529061000 | 0.865772000  |
| 6 | 2.337355000  | 1.497624000 | -0.326909000 |

|    |              |              |              |
|----|--------------|--------------|--------------|
| 6  | 3.719278000  | 1.493745000  | -0.316854000 |
| 6  | 4.412669000  | 1.494059000  | 0.884574000  |
| 6  | 3.701652000  | 1.501663000  | 2.073155000  |
| 6  | 2.316668000  | 1.522200000  | 2.067143000  |
| 1  | 1.793426000  | 1.469720000  | -1.267191000 |
| 1  | 4.259893000  | 1.474778000  | -1.257149000 |
| 1  | 5.495937000  | 1.485755000  | 0.893071000  |
| 1  | 4.229405000  | 1.501201000  | 3.020355000  |
| 1  | 1.763585000  | 1.545656000  | 3.000208000  |
| 5  | -0.634186000 | 2.207883000  | -0.105377000 |
| 7  | -0.338045000 | 3.447544000  | -0.694536000 |
| 6  | -1.135823000 | 4.032354000  | -1.752343000 |
| 1  | -1.533313000 | 5.006067000  | -1.441741000 |
| 1  | -0.518517000 | 4.202085000  | -2.643268000 |
| 1  | -1.963993000 | 3.375220000  | -2.008624000 |
| 6  | 0.773707000  | 4.293555000  | -0.328666000 |
| 1  | 1.544427000  | 4.311184000  | -1.109895000 |
| 1  | 0.421938000  | 5.321697000  | -0.189203000 |
| 1  | 1.238929000  | 3.965479000  | 0.598841000  |
| 15 | -3.469275000 | -0.685366000 | 0.524279000  |
| 6  | -3.554928000 | -1.483382000 | -1.088304000 |
| 1  | -4.412973000 | -2.155551000 | -1.146918000 |
| 1  | -3.630850000 | -0.709558000 | -1.852205000 |
| 1  | -2.632596000 | -2.047651000 | -1.244256000 |
| 6  | -5.073019000 | 0.096208000  | 0.765641000  |
| 1  | -5.875370000 | -0.631931000 | 0.631235000  |
| 1  | -5.122808000 | 0.513808000  | 1.771695000  |
| 1  | -5.177706000 | 0.901085000  | 0.038358000  |
| 6  | -3.385053000 | -2.025926000 | 1.718744000  |
| 1  | -2.509094000 | -2.644815000 | 1.514192000  |
| 1  | -3.304492000 | -1.625966000 | 2.730084000  |
| 1  | -4.282524000 | -2.641792000 | 1.643052000  |
| 8  | -2.897805000 | 1.647471000  | -1.168494000 |
| 14 | -0.620352000 | 0.153310000  | 1.673821000  |
| 1  | 0.523294000  | -0.917681000 | -0.247282000 |
| 14 | 1.359660000  | -2.054785000 | -0.713547000 |
| 6  | 2.902575000  | -2.185099000 | 0.336960000  |
| 1  | 3.460670000  | -1.247507000 | 0.234599000  |
| 1  | 2.605829000  | -2.235944000 | 1.390344000  |
| 6  | 0.297864000  | -3.596524000 | -0.522780000 |



|   |              |              |              |
|---|--------------|--------------|--------------|
| 1 | -0.661284000 | -3.405275000 | -1.019996000 |
| 1 | 0.751804000  | -4.432365000 | -1.066747000 |
| 6 | 1.745545000  | -1.718843000 | -2.518098000 |
| 1 | 2.157794000  | -2.623737000 | -2.978599000 |
| 1 | 2.539264000  | -0.964241000 | -2.567605000 |
| 6 | 3.770597000  | -3.375557000 | -0.045444000 |
| 1 | 4.676854000  | -3.439858000 | 0.561208000  |
| 1 | 3.232295000  | -4.320467000 | 0.075217000  |
| 1 | 4.084867000  | -3.318123000 | -1.091870000 |
| 6 | 0.074338000  | -3.964453000 | 0.938057000  |
| 1 | 1.001030000  | -4.306347000 | 1.406042000  |
| 1 | -0.264488000 | -3.100503000 | 1.521757000  |
| 1 | -0.664946000 | -4.760199000 | 1.062238000  |
| 6 | 0.509509000  | -1.245280000 | -3.272091000 |
| 1 | 0.107370000  | -0.326564000 | -2.831759000 |
| 1 | 0.712084000  | -1.042284000 | -4.326281000 |
| 1 | -0.291166000 | -1.990585000 | -3.235499000 |

**1GeV** (T.E.= -3825.485721)

|    |             |              |              |
|----|-------------|--------------|--------------|
| 6  | 1.244953000 | -2.037944000 | 1.378990000  |
| 6  | 2.588101000 | -1.496466000 | 0.943241000  |
| 6  | 2.410688000 | -0.156693000 | 0.191703000  |
| 1  | 1.312426000 | -3.101759000 | 1.635215000  |
| 1  | 0.896469000 | -1.518505000 | 2.284603000  |
| 1  | 3.047090000 | -2.238363000 | 0.279369000  |
| 1  | 3.256600000 | -1.409750000 | 1.807541000  |
| 32 | 0.733663000 | -0.435206000 | -0.887365000 |
| 7  | 0.318810000 | -1.845805000 | 0.273218000  |
| 14 | 2.069399000 | 1.265132000  | 1.391783000  |
| 14 | 3.851587000 | 0.136662000  | -0.979572000 |
| 6  | 4.156877000 | -1.429597000 | -1.974863000 |
| 1  | 3.243624000 | -1.784774000 | -2.463479000 |
| 1  | 4.888189000 | -1.218547000 | -2.759807000 |
| 1  | 4.551098000 | -2.248992000 | -1.370672000 |
| 6  | 3.519508000 | 1.487741000  | -2.238285000 |
| 1  | 3.525978000 | 2.489343000  | -1.808026000 |
| 1  | 4.300698000 | 1.450698000  | -3.002736000 |
| 1  | 2.560540000 | 1.346158000  | -2.744651000 |
| 6  | 5.429248000 | 0.534680000  | -0.046680000 |
| 1  | 5.639223000 | -0.225921000 | 0.710680000  |

|    |              |              |              |
|----|--------------|--------------|--------------|
| 1  | 6.279235000  | 0.562828000  | -0.733699000 |
| 1  | 5.375973000  | 1.504063000  | 0.455568000  |
| 6  | 2.313644000  | 2.948444000  | 0.606617000  |
| 1  | 1.693908000  | 3.068566000  | -0.286615000 |
| 1  | 2.001270000  | 3.709409000  | 1.327549000  |
| 1  | 3.350332000  | 3.155019000  | 0.334276000  |
| 6  | 0.294204000  | 1.299666000  | 2.021937000  |
| 1  | -0.037472000 | 0.368813000  | 2.488353000  |
| 1  | 0.211178000  | 2.094178000  | 2.770293000  |
| 1  | -0.408354000 | 1.541102000  | 1.218718000  |
| 6  | 3.178818000  | 1.120890000  | 2.896700000  |
| 1  | 2.915839000  | 0.253270000  | 3.506901000  |
| 1  | 4.235296000  | 1.041911000  | 2.631192000  |
| 1  | 3.051546000  | 2.010697000  | 3.519318000  |
| 6  | -0.917312000 | -2.488902000 | 0.315369000  |
| 6  | -1.662501000 | -2.657814000 | -0.857168000 |
| 6  | -1.464526000 | -2.959792000 | 1.511498000  |
| 6  | -2.912661000 | -3.241592000 | -0.825848000 |
| 1  | -1.242587000 | -2.328285000 | -1.802329000 |
| 6  | -2.716758000 | -3.552030000 | 1.531273000  |
| 1  | -0.917737000 | -2.845686000 | 2.439345000  |
| 6  | -3.453457000 | -3.693695000 | 0.369288000  |
| 1  | -3.466914000 | -3.355777000 | -1.751178000 |
| 1  | -3.119713000 | -3.902663000 | 2.474967000  |
| 1  | -4.432791000 | -4.155955000 | 0.390005000  |
| 1  | -1.330642000 | 1.964090000  | -0.810193000 |
| 14 | -2.783916000 | 1.929190000  | -0.470556000 |
| 6  | -3.721397000 | 1.643841000  | -2.070291000 |
| 1  | -4.795448000 | 1.605797000  | -1.856420000 |
| 1  | -3.572398000 | 2.513391000  | -2.718987000 |
| 6  | -3.094523000 | 0.511559000  | 0.730213000  |
| 1  | -2.407455000 | -0.309058000 | 0.491659000  |
| 1  | -2.805954000 | 0.854377000  | 1.731512000  |
| 6  | -3.218268000 | 3.579013000  | 0.314790000  |
| 1  | -2.492012000 | 3.763224000  | 1.115569000  |
| 1  | -3.048343000 | 4.365474000  | -0.428809000 |
| 6  | -4.635477000 | 3.659531000  | 0.863382000  |
| 1  | -4.790044000 | 2.930783000  | 1.663540000  |
| 1  | -4.864794000 | 4.645353000  | 1.274944000  |
| 1  | -5.379776000 | 3.449919000  | 0.089342000  |

|   |              |              |              |
|---|--------------|--------------|--------------|
| 6 | -4.524022000 | -0.013834000 | 0.742025000  |
| 1 | -5.253463000 | 0.776049000  | 0.940300000  |
| 1 | -4.789095000 | -0.461368000 | -0.219472000 |
| 1 | -4.663666000 | -0.785575000 | 1.502779000  |
| 6 | -3.268458000 | 0.368517000  | -2.768663000 |
| 1 | -3.430244000 | -0.509475000 | -2.135302000 |
| 1 | -3.797516000 | 0.195158000  | -3.708894000 |
| 1 | -2.198034000 | 0.401086000  | -2.993658000 |

**2Ge<sub>v</sub>** (T.E.= -3824.303231)

|    |             |              |              |
|----|-------------|--------------|--------------|
| 6  | 2.294582000 | -0.103399000 | 0.318688000  |
| 6  | 2.096523000 | -1.026363000 | 1.463404000  |
| 6  | 0.973175000 | -1.759576000 | 1.469299000  |
| 1  | 2.831293000 | -1.129029000 | 2.256942000  |
| 1  | 0.717514000 | -2.487367000 | 2.233512000  |
| 32 | 0.669594000 | -0.291097000 | -0.844691000 |
| 7  | 0.120169000 | -1.612077000 | 0.392087000  |
| 14 | 3.726758000 | -0.736156000 | -0.742241000 |
| 14 | 2.434272000 | 1.653387000  | 0.987516000  |
| 6  | 3.931376000 | 0.232556000  | -2.334977000 |
| 1  | 4.646297000 | -0.292976000 | -2.974500000 |
| 1  | 2.992841000 | 0.315579000  | -2.889595000 |
| 1  | 4.315430000 | 1.240485000  | -2.171051000 |
| 6  | 3.790897000 | 1.788130000  | 2.273569000  |
| 1  | 4.779034000 | 1.559107000  | 1.871450000  |
| 1  | 3.813279000 | 2.813111000  | 2.654688000  |
| 1  | 3.608391000 | 1.126823000  | 3.123687000  |
| 6  | 2.765658000 | 2.902161000  | -0.368288000 |
| 1  | 2.090774000 | 2.772229000  | -1.219211000 |
| 1  | 2.615081000 | 3.911169000  | 0.025139000  |
| 1  | 3.791583000 | 2.841444000  | -0.738162000 |
| 6  | 0.826102000 | 2.120682000  | 1.832192000  |
| 1  | 0.060916000 | 2.396145000  | 1.102495000  |
| 1  | 0.433172000 | 1.297737000  | 2.435646000  |
| 1  | 0.982140000 | 2.979174000  | 2.490758000  |
| 6  | 5.345161000 | -0.672187000 | 0.199069000  |
| 1  | 6.106749000 | -1.246636000 | -0.335083000 |
| 1  | 5.707733000 | 0.354490000  | 0.293097000  |
| 1  | 5.250467000 | -1.090812000 | 1.204043000  |
| 6  | 3.379499000 | -2.517367000 | -1.219017000 |

|    |              |              |              |
|----|--------------|--------------|--------------|
| 1  | 4.261591000  | -2.953629000 | -1.695530000 |
| 1  | 3.124987000  | -3.130552000 | -0.352190000 |
| 1  | 2.553656000  | -2.584939000 | -1.933626000 |
| 6  | -1.134020000 | -2.237642000 | 0.368192000  |
| 6  | -1.603144000 | -2.801151000 | -0.815663000 |
| 6  | -1.948193000 | -2.266850000 | 1.498901000  |
| 6  | -2.859068000 | -3.377583000 | -0.867724000 |
| 1  | -0.960724000 | -2.792567000 | -1.690506000 |
| 6  | -3.200167000 | -2.852203000 | 1.442380000  |
| 1  | -1.600925000 | -1.797726000 | 2.413932000  |
| 6  | -3.663379000 | -3.408993000 | 0.260572000  |
| 1  | -3.209159000 | -3.812562000 | -1.796756000 |
| 1  | -3.826038000 | -2.858395000 | 2.327809000  |
| 1  | -4.645568000 | -3.864243000 | 0.219443000  |
| 1  | -1.569860000 | 0.685998000  | 0.570957000  |
| 14 | -2.687152000 | 1.445476000  | -0.059138000 |
| 6  | -1.957757000 | 2.945580000  | -0.928249000 |
| 1  | -1.547065000 | 3.611235000  | -0.159651000 |
| 1  | -1.099881000 | 2.611190000  | -1.524632000 |
| 6  | -3.576997000 | 0.301863000  | -1.256635000 |
| 1  | -2.944367000 | 0.187759000  | -2.145793000 |
| 1  | -3.612872000 | -0.692613000 | -0.797687000 |
| 6  | -3.828453000 | 1.966717000  | 1.336923000  |
| 1  | -4.679547000 | 2.526446000  | 0.932057000  |
| 1  | -3.278571000 | 2.671195000  | 1.971686000  |
| 6  | -4.980959000 | 0.742011000  | -1.650225000 |
| 1  | -5.442755000 | 0.044300000  | -2.353073000 |
| 1  | -5.639054000 | 0.801526000  | -0.779218000 |
| 1  | -4.987207000 | 1.728260000  | -2.121252000 |
| 6  | -2.945111000 | 3.701447000  | -1.804995000 |
| 1  | -2.509145000 | 4.607405000  | -2.232657000 |
| 1  | -3.286090000 | 3.081218000  | -2.637600000 |
| 1  | -3.833721000 | 4.002126000  | -1.241972000 |
| 6  | -4.309348000 | 0.776622000  | 2.155988000  |
| 1  | -3.464819000 | 0.222056000  | 2.576479000  |
| 1  | -4.956083000 | 1.073097000  | 2.985183000  |
| 1  | -4.870216000 | 0.067749000  | 1.539883000  |

**3Ge<sub>v</sub>** (T.E.= -3945.589486)

|    |              |              |              |
|----|--------------|--------------|--------------|
| 6  | -2.291402000 | -0.604214000 | -1.199600000 |
| 6  | -2.135842000 | 0.465321000  | -0.084251000 |
| 1  | -3.306716000 | -1.024916000 | -1.216085000 |
| 1  | -2.189578000 | -0.151680000 | -2.196176000 |
| 7  | -0.271000000 | -1.560064000 | -0.001696000 |
| 5  | -1.246742000 | -1.788541000 | -1.043725000 |
| 7  | -1.347164000 | -2.965489000 | -1.827260000 |
| 6  | -2.234182000 | -3.054837000 | -2.963029000 |
| 1  | -1.681106000 | -3.353158000 | -3.862612000 |
| 1  | -3.017194000 | -3.807174000 | -2.800925000 |
| 1  | -2.715025000 | -2.101135000 | -3.170511000 |
| 6  | -0.654707000 | -4.214990000 | -1.611385000 |
| 1  | 0.098049000  | -4.405501000 | -2.387931000 |
| 1  | -0.156158000 | -4.241245000 | -0.645437000 |
| 1  | -1.371677000 | -5.043887000 | -1.640961000 |
| 14 | -3.596238000 | 0.342504000  | 1.092021000  |
| 14 | -1.829937000 | 2.163188000  | -0.816613000 |
| 6  | -3.549884000 | -1.351758000 | 1.911254000  |
| 1  | -2.692028000 | -1.461445000 | 2.583427000  |
| 1  | -4.452426000 | -1.512776000 | 2.506865000  |
| 1  | -3.491572000 | -2.152714000 | 1.168784000  |
| 6  | -5.251963000 | 0.484281000  | 0.221973000  |
| 1  | -6.046894000 | 0.295650000  | 0.949462000  |
| 1  | -5.411180000 | 1.478954000  | -0.197394000 |
| 1  | -5.364563000 | -0.243751000 | -0.584060000 |
| 6  | -3.391411000 | 2.930049000  | -1.519959000 |
| 1  | -3.140329000 | 3.813345000  | -2.113731000 |
| 1  | -3.910459000 | 2.222798000  | -2.173293000 |
| 1  | -4.086962000 | 3.239831000  | -0.736226000 |
| 6  | -1.107483000 | 3.365314000  | 0.432449000  |
| 1  | -0.806815000 | 4.283524000  | -0.080733000 |
| 1  | -1.835197000 | 3.636628000  | 1.199292000  |
| 1  | -0.225342000 | 2.971177000  | 0.945791000  |
| 6  | -3.548094000 | 1.640640000  | 2.445408000  |
| 1  | -3.732967000 | 2.644597000  | 2.054583000  |
| 1  | -4.329600000 | 1.424762000  | 3.179033000  |
| 1  | -2.590536000 | 1.655088000  | 2.973236000  |
| 6  | -0.628819000 | 2.004251000  | -2.258041000 |
| 1  | 0.186890000  | 1.306310000  | -2.048368000 |

|    |              |              |              |
|----|--------------|--------------|--------------|
| 1  | -1.137864000 | 1.659028000  | -3.161162000 |
| 1  | -0.191082000 | 2.980830000  | -2.483772000 |
| 32 | -0.559361000 | -0.034244000 | 1.058197000  |
| 6  | 0.916586000  | -2.279955000 | 0.213353000  |
| 6  | 1.893264000  | -2.335293000 | -0.779473000 |
| 6  | 1.159719000  | -2.919319000 | 1.426354000  |
| 6  | 3.067399000  | -3.036052000 | -0.573589000 |
| 1  | 1.707100000  | -1.823444000 | -1.719642000 |
| 6  | 2.339942000  | -3.614092000 | 1.631969000  |
| 1  | 0.397516000  | -2.877708000 | 2.198580000  |
| 6  | 3.297219000  | -3.680073000 | 0.633265000  |
| 1  | 3.813151000  | -3.074664000 | -1.360078000 |
| 1  | 2.509957000  | -4.110109000 | 2.580886000  |
| 1  | 4.218313000  | -4.227262000 | 0.794195000  |
| 1  | 1.555706000  | 0.809304000  | -0.309559000 |
| 14 | 2.837213000  | 1.553739000  | -0.098541000 |
| 6  | 2.521568000  | 3.353590000  | -0.534313000 |
| 1  | 1.995142000  | 3.390209000  | -1.494600000 |
| 1  | 1.814439000  | 3.746872000  | 0.205180000  |
| 6  | 3.296680000  | 1.386582000  | 1.710532000  |
| 1  | 4.142248000  | 2.049789000  | 1.927739000  |
| 1  | 2.452454000  | 1.774387000  | 2.293538000  |
| 6  | 4.131085000  | 0.760886000  | -1.207937000 |
| 1  | 3.901640000  | 1.036430000  | -2.244018000 |
| 1  | 3.984029000  | -0.323177000 | -1.148874000 |
| 6  | 3.768884000  | 4.225068000  | -0.582007000 |
| 1  | 3.526875000  | 5.279363000  | -0.735317000 |
| 1  | 4.345519000  | 4.156424000  | 0.345262000  |
| 1  | 4.432208000  | 3.924491000  | -1.396934000 |
| 6  | 3.614103000  | -0.043827000 | 2.121805000  |
| 1  | 4.484605000  | -0.430120000 | 1.584296000  |
| 1  | 3.827319000  | -0.129910000 | 3.189850000  |
| 1  | 2.781395000  | -0.719645000 | 1.901315000  |
| 6  | 5.575322000  | 1.106816000  | -0.869262000 |
| 1  | 6.280614000  | 0.611464000  | -1.540868000 |
| 1  | 5.766275000  | 2.180197000  | -0.934364000 |
| 1  | 5.830642000  | 0.799706000  | 0.148288000  |

4Ge<sub>v</sub> (T.E.= -4155.501359)

|    |              |              |              |
|----|--------------|--------------|--------------|
| 6  | 2.460727000  | -0.873487000 | 1.211216000  |
| 6  | 2.206207000  | 0.220088000  | 0.134187000  |
| 1  | 3.275759000  | -1.545016000 | 0.908837000  |
| 1  | 2.801200000  | -0.446313000 | 2.163871000  |
| 7  | 0.026151000  | -1.621447000 | 0.050261000  |
| 14 | 3.612887000  | 0.125068000  | -1.118391000 |
| 14 | 1.977439000  | 1.907546000  | 0.928536000  |
| 6  | 3.469513000  | -1.517344000 | -2.029808000 |
| 1  | 2.576408000  | -1.558499000 | -2.662300000 |
| 1  | 4.334171000  | -1.660699000 | -2.683645000 |
| 1  | 3.429659000  | -2.368887000 | -1.345059000 |
| 6  | 5.302354000  | 0.156765000  | -0.304856000 |
| 1  | 6.060618000  | -0.066925000 | -1.060737000 |
| 1  | 5.535538000  | 1.132960000  | 0.122322000  |
| 1  | 5.395934000  | -0.589342000 | 0.486977000  |
| 6  | 3.589051000  | 2.618218000  | 1.576457000  |
| 1  | 4.263220000  | 2.918193000  | 0.771289000  |
| 1  | 3.374277000  | 3.505011000  | 2.179471000  |
| 1  | 4.118157000  | 1.903265000  | 2.212113000  |
| 6  | 1.215099000  | 3.161758000  | -0.242256000 |
| 1  | 1.150694000  | 4.126355000  | 0.270156000  |
| 1  | 1.797303000  | 3.305688000  | -1.153637000 |
| 1  | 0.199359000  | 2.882512000  | -0.535691000 |
| 6  | 3.555870000  | 1.483035000  | -2.410404000 |
| 1  | 3.769225000  | 2.467337000  | -1.987170000 |
| 1  | 4.313158000  | 1.281375000  | -3.173098000 |
| 1  | 2.584748000  | 1.531860000  | -2.910382000 |
| 6  | 0.828782000  | 1.782349000  | 2.409494000  |
| 1  | -0.124835000 | 1.311294000  | 2.153526000  |
| 1  | 1.274544000  | 1.221065000  | 3.233897000  |
| 1  | 0.614909000  | 2.791410000  | 2.774320000  |
| 14 | 0.967316000  | -1.982362000 | 1.482303000  |
| 6  | 0.117311000  | -1.616554000 | 3.114664000  |
| 1  | -0.497910000 | -0.715274000 | 3.074873000  |
| 1  | -0.511707000 | -2.447591000 | 3.441953000  |
| 1  | 0.877882000  | -1.460252000 | 3.885425000  |
| 6  | 1.448935000  | -3.786973000 | 1.475918000  |
| 1  | 2.009687000  | -4.034216000 | 0.571151000  |
| 1  | 2.074453000  | -4.023724000 | 2.340402000  |

|    |              |              |              |
|----|--------------|--------------|--------------|
| 1  | 0.569033000  | -4.433717000 | 1.516040000  |
| 32 | 0.577312000  | -0.163351000 | -1.002678000 |
| 6  | -1.159097000 | -2.284024000 | -0.299309000 |
| 6  | -1.488320000 | -2.509661000 | -1.640313000 |
| 6  | -2.064133000 | -2.729330000 | 0.668559000  |
| 6  | -2.682590000 | -3.109973000 | -1.993423000 |
| 1  | -0.784347000 | -2.213422000 | -2.411544000 |
| 6  | -3.250236000 | -3.345608000 | 0.311377000  |
| 1  | -1.846403000 | -2.566585000 | 1.717708000  |
| 6  | -3.576121000 | -3.531734000 | -1.021296000 |
| 1  | -2.909098000 | -3.263328000 | -3.042683000 |
| 1  | -3.932272000 | -3.670639000 | 1.089602000  |
| 1  | -4.508272000 | -4.008295000 | -1.299463000 |
| 1  | -1.296252000 | 1.034840000  | 0.233824000  |
| 14 | -2.644545000 | 1.581106000  | -0.114120000 |
| 6  | -2.770790000 | 1.654428000  | -1.982111000 |
| 1  | -1.903608000 | 2.202178000  | -2.368535000 |
| 1  | -2.656221000 | 0.626689000  | -2.347893000 |
| 6  | -3.895126000 | 0.392589000  | 0.611995000  |
| 1  | -4.909868000 | 0.772255000  | 0.449546000  |
| 1  | -3.824408000 | -0.545458000 | 0.048251000  |
| 6  | -2.763683000 | 3.278827000  | 0.687836000  |
| 1  | -2.247791000 | 3.232821000  | 1.654058000  |
| 1  | -2.181842000 | 3.978687000  | 0.076161000  |
| 6  | -4.065129000 | 2.266233000  | -2.498567000 |
| 1  | -4.142536000 | 2.207292000  | -3.586623000 |
| 1  | -4.942172000 | 1.760878000  | -2.083317000 |
| 1  | -4.142277000 | 3.322388000  | -2.227086000 |
| 6  | -3.642381000 | 0.137662000  | 2.090358000  |
| 1  | -3.749525000 | 1.052073000  | 2.681008000  |
| 1  | -4.325299000 | -0.606205000 | 2.509065000  |
| 1  | -2.623865000 | -0.230495000 | 2.252677000  |
| 6  | -4.184525000 | 3.793522000  | 0.880216000  |
| 1  | -4.200823000 | 4.794520000  | 1.317571000  |
| 1  | -4.732186000 | 3.843695000  | -0.064542000 |
| 1  | -4.757154000 | 3.141889000  | 1.545006000  |

**5Ge<sub>v</sub>** (T.E.= -3899.556518)

|   |             |              |              |
|---|-------------|--------------|--------------|
| 6 | 2.247520000 | -1.202787000 | -1.333430000 |
| 6 | 2.244251000 | -0.116700000 | -0.250938000 |



|    |              |              |              |
|----|--------------|--------------|--------------|
| 1  | 2.565990000  | -0.850109000 | -2.320766000 |
| 1  | 2.950667000  | -2.012841000 | -1.094114000 |
| 7  | 0.098702000  | -1.739627000 | -0.402452000 |
| 14 | 2.003500000  | 1.588842000  | -1.022216000 |
| 14 | 3.755664000  | -0.302105000 | 0.857838000  |
| 6  | 0.776069000  | 1.476507000  | -2.437909000 |
| 1  | -0.198375000 | 1.091246000  | -2.124075000 |
| 1  | 0.617350000  | 2.479152000  | -2.846168000 |
| 1  | 1.140923000  | 0.847096000  | -3.252796000 |
| 6  | 3.601514000  | 2.257537000  | -1.734863000 |
| 1  | 3.395022000  | 3.172222000  | -2.297237000 |
| 1  | 4.328016000  | 2.501045000  | -0.956407000 |
| 1  | 4.064643000  | 1.541709000  | -2.419225000 |
| 6  | 5.336216000  | -0.401522000 | -0.142070000 |
| 1  | 5.600201000  | 0.559625000  | -0.586260000 |
| 1  | 6.158839000  | -0.705667000 | 0.510925000  |
| 1  | 5.267478000  | -1.135277000 | -0.948522000 |
| 6  | 3.903756000  | 1.089913000  | 2.101849000  |
| 1  | 4.714601000  | 0.862519000  | 2.798991000  |
| 1  | 4.137301000  | 2.045571000  | 1.626465000  |
| 1  | 2.990776000  | 1.216880000  | 2.690160000  |
| 6  | 1.353851000  | 2.824669000  | 0.233883000  |
| 1  | 2.021651000  | 2.931537000  | 1.090723000  |
| 1  | 1.260179000  | 3.807121000  | -0.238457000 |
| 1  | 0.364824000  | 2.555649000  | 0.617929000  |
| 6  | 3.576505000  | -1.907991000 | 1.820346000  |
| 1  | 2.779505000  | -1.840536000 | 2.568291000  |
| 1  | 3.356437000  | -2.761892000 | 1.173951000  |
| 1  | 4.501922000  | -2.133997000 | 2.356890000  |
| 6  | -1.189170000 | -2.319373000 | -0.354147000 |
| 6  | -2.068577000 | -2.229630000 | -1.429869000 |
| 6  | -1.615969000 | -2.924347000 | 0.822445000  |
| 6  | -3.344576000 | -2.751153000 | -1.324430000 |
| 1  | -1.746268000 | -1.745036000 | -2.343073000 |
| 6  | -2.901462000 | -3.426228000 | 0.928382000  |
| 1  | -0.924994000 | -3.002318000 | 1.656180000  |
| 6  | -3.769942000 | -3.346491000 | -0.147064000 |
| 1  | -4.020689000 | -2.676065000 | -2.168646000 |
| 1  | -3.220150000 | -3.890494000 | 1.854449000  |
| 1  | -4.773781000 | -3.746845000 | -0.069116000 |

|    |              |              |              |
|----|--------------|--------------|--------------|
| 6  | 0.916613000  | -1.901403000 | -1.506800000 |
| 8  | 0.647742000  | -2.563565000 | -2.482336000 |
| 32 | 0.651522000  | -0.480905000 | 0.908556000  |
| 1  | -1.390657000 | 0.607072000  | -0.273216000 |
| 14 | -2.555356000 | 1.474430000  | 0.091042000  |
| 6  | -2.602505000 | 1.605543000  | 1.963631000  |
| 1  | -3.354438000 | 2.352240000  | 2.242016000  |
| 1  | -1.643052000 | 2.010902000  | 2.307810000  |
| 6  | -4.113400000 | 0.660209000  | -0.555729000 |
| 1  | -4.193857000 | -0.345879000 | -0.128130000 |
| 1  | -3.990479000 | 0.509124000  | -1.634372000 |
| 6  | -2.296486000 | 3.155527000  | -0.723765000 |
| 1  | -1.235664000 | 3.263564000  | -0.971253000 |
| 1  | -2.821082000 | 3.138679000  | -1.686385000 |
| 6  | -2.893604000 | 0.279724000  | 2.653016000  |
| 1  | -2.915695000 | 0.379837000  | 3.740642000  |
| 1  | -3.858036000 | -0.133055000 | 2.344260000  |
| 1  | -2.135797000 | -0.471364000 | 2.410448000  |
| 6  | -5.361409000 | 1.482238000  | -0.266666000 |
| 1  | -5.297019000 | 2.476498000  | -0.718713000 |
| 1  | -6.266802000 | 1.009297000  | -0.653870000 |
| 1  | -5.507234000 | 1.627924000  | 0.807942000  |
| 6  | -2.748965000 | 4.346361000  | 0.110102000  |
| 1  | -2.624414000 | 5.290463000  | -0.425214000 |
| 1  | -3.802134000 | 4.270853000  | 0.394928000  |
| 1  | -2.171930000 | 4.418461000  | 1.035953000  |

**8Ge<sub>v</sub>** (T.E.= -3468.175521)

|    |              |              |              |
|----|--------------|--------------|--------------|
| 6  | -0.253176000 | -1.849651000 | -1.620073000 |
| 6  | 1.082048000  | -1.128267000 | -1.714891000 |
| 6  | 1.797147000  | -1.292340000 | -0.391519000 |
| 1  | -0.959069000 | -1.440309000 | -2.354447000 |
| 1  | -0.119572000 | -2.917062000 | -1.860626000 |
| 1  | 0.891836000  | -0.059920000 | -1.922847000 |
| 1  | 1.647090000  | -1.516580000 | -2.573157000 |
| 32 | 0.594326000  | -1.505255000 | 1.051586000  |
| 7  | -0.767443000 | -1.673394000 | -0.274872000 |
| 15 | 3.400541000  | -0.798451000 | -0.241458000 |
| 6  | 4.583304000  | -1.765139000 | -1.211344000 |
| 1  | 4.271722000  | -1.759098000 | -2.257504000 |

|    |              |              |              |
|----|--------------|--------------|--------------|
| 1  | 5.590910000  | -1.351244000 | -1.137501000 |
| 1  | 4.580463000  | -2.795746000 | -0.855132000 |
| 6  | 3.994762000  | -0.870624000 | 1.453958000  |
| 1  | 3.448165000  | -0.158606000 | 2.073983000  |
| 1  | 3.848855000  | -1.874653000 | 1.853730000  |
| 1  | 5.057388000  | -0.624250000 | 1.478281000  |
| 6  | 3.704388000  | 0.898459000  | -0.798580000 |
| 1  | 4.764142000  | 1.156419000  | -0.756261000 |
| 1  | 3.354244000  | 0.998241000  | -1.828351000 |
| 1  | 3.132686000  | 1.585336000  | -0.170660000 |
| 6  | -2.123098000 | -1.685053000 | -0.053134000 |
| 6  | -3.035837000 | -2.225160000 | -0.972827000 |
| 6  | -2.655618000 | -1.101966000 | 1.109727000  |
| 6  | -4.399653000 | -2.163756000 | -0.744529000 |
| 1  | -2.669779000 | -2.703030000 | -1.873607000 |
| 6  | -4.015777000 | -1.055814000 | 1.330016000  |
| 1  | -1.976813000 | -0.654543000 | 1.830490000  |
| 6  | -4.907459000 | -1.577754000 | 0.402177000  |
| 1  | -5.075546000 | -2.586769000 | -1.480357000 |
| 1  | -4.388485000 | -0.585240000 | 2.233885000  |
| 1  | -5.975992000 | -1.527055000 | 0.572267000  |
| 1  | -0.295620000 | 0.886576000  | -0.025849000 |
| 14 | -0.704183000 | 2.305849000  | 0.103609000  |
| 6  | -2.564281000 | 2.413648000  | -0.102548000 |
| 1  | -3.028133000 | 1.971179000  | 0.786311000  |
| 1  | -2.869518000 | 3.466200000  | -0.113718000 |
| 6  | 0.181861000  | 3.263846000  | -1.250976000 |
| 1  | 1.255022000  | 3.051247000  | -1.176223000 |
| 1  | -0.129477000 | 2.850093000  | -2.216900000 |
| 6  | -0.157496000 | 2.890567000  | 1.802922000  |
| 1  | -0.488013000 | 3.921310000  | 1.971577000  |
| 1  | -0.690622000 | 2.278647000  | 2.540501000  |
| 6  | -3.047350000 | 1.690002000  | -1.352019000 |
| 1  | -2.789821000 | 0.626121000  | -1.306556000 |
| 1  | -4.131397000 | 1.751947000  | -1.474388000 |
| 1  | -2.593323000 | 2.101560000  | -2.258951000 |
| 6  | -0.072134000 | 4.762792000  | -1.201961000 |
| 1  | -1.136788000 | 4.989565000  | -1.309498000 |
| 1  | 0.250540000  | 5.191135000  | -0.248192000 |
| 1  | 0.453559000  | 5.302888000  | -1.993186000 |

|   |             |             |             |
|---|-------------|-------------|-------------|
| 6 | 1.345294000 | 2.766247000 | 2.005529000 |
| 1 | 1.898314000 | 3.416057000 | 1.319874000 |
| 1 | 1.656870000 | 3.027825000 | 3.019590000 |
| 1 | 1.678737000 | 1.738324000 | 1.818561000 |

**9Ge<sub>v</sub>** (T.E.= -3467.001277)

|    |              |              |              |
|----|--------------|--------------|--------------|
| 6  | 0.490885000  | -1.309821000 | -1.746491000 |
| 6  | 1.733940000  | -0.770190000 | -1.738244000 |
| 6  | 2.348691000  | -0.676144000 | -0.446855000 |
| 7  | -0.011572000 | -1.691980000 | -0.524801000 |
| 15 | 3.748901000  | 0.245524000  | -0.189871000 |
| 6  | 5.138135000  | -0.202880000 | -1.250431000 |
| 1  | 4.830375000  | -0.115133000 | -2.293901000 |
| 1  | 5.993778000  | 0.451413000  | -1.074066000 |
| 1  | 5.418736000  | -1.238408000 | -1.056700000 |
| 6  | 4.337035000  | 0.109124000  | 1.501194000  |
| 1  | 5.221359000  | 0.733511000  | 1.635502000  |
| 1  | 3.556435000  | 0.439837000  | 2.187785000  |
| 1  | 4.587042000  | -0.928575000 | 1.722874000  |
| 6  | 3.510151000  | 2.010667000  | -0.489437000 |
| 1  | 2.765089000  | 2.386516000  | 0.214208000  |
| 1  | 4.441830000  | 2.568985000  | -0.379492000 |
| 1  | 3.122329000  | 2.143610000  | -1.501365000 |
| 32 | 1.189278000  | -1.307792000 | 0.939134000  |
| 6  | -1.343145000 | -2.076656000 | -0.368806000 |
| 6  | -1.729991000 | -2.795224000 | 0.766802000  |
| 6  | -2.336560000 | -1.729972000 | -1.289072000 |
| 6  | -3.052414000 | -3.124212000 | 0.985142000  |
| 1  | -0.970404000 | -3.091703000 | 1.482536000  |
| 6  | -3.658299000 | -2.080653000 | -1.071896000 |
| 1  | -2.079966000 | -1.151610000 | -2.168504000 |
| 6  | -4.031977000 | -2.771716000 | 0.067314000  |
| 1  | -3.320272000 | -3.675013000 | 1.880004000  |
| 1  | -4.406901000 | -1.790956000 | -1.801610000 |
| 1  | -5.068343000 | -3.037247000 | 0.237038000  |
| 1  | -0.080500000 | -1.498673000 | -2.648239000 |
| 1  | 2.215892000  | -0.470156000 | -2.665695000 |
| 1  | 0.040573000  | 1.253939000  | -0.142635000 |
| 14 | -1.262166000 | 1.965189000  | -0.043332000 |
| 6  | -2.036396000 | 2.096873000  | -1.761217000 |

|   |              |             |              |
|---|--------------|-------------|--------------|
| 1 | -1.717515000 | 3.051853000 | -2.196234000 |
| 1 | -1.586328000 | 1.322750000 | -2.391566000 |
| 6 | -0.899266000 | 3.686706000 | 0.626281000  |
| 1 | -0.367407000 | 3.588391000 | 1.579472000  |
| 1 | -0.194621000 | 4.169535000 | -0.060969000 |
| 6 | -2.394614000 | 1.048523000 | 1.142180000  |
| 1 | -3.356608000 | 1.573353000 | 1.175502000  |
| 1 | -2.611428000 | 0.061912000 | 0.719245000  |
| 6 | -3.553378000 | 1.978971000 | -1.800092000 |
| 1 | -3.948679000 | 2.104583000 | -2.811332000 |
| 1 | -3.880659000 | 0.999198000 | -1.441463000 |
| 1 | -4.038229000 | 2.727526000 | -1.167274000 |
| 6 | -2.144415000 | 4.544469000 | 0.794781000  |
| 1 | -2.675078000 | 4.663183000 | -0.154955000 |
| 1 | -2.847747000 | 4.093153000 | 1.501058000  |
| 1 | -1.916168000 | 5.547529000 | 1.163806000  |
| 6 | -1.822369000 | 0.901218000 | 2.543878000  |
| 1 | -2.486674000 | 0.330385000 | 3.197850000  |
| 1 | -0.860632000 | 0.376519000 | 2.526604000  |
| 1 | -1.654440000 | 1.873017000 | 3.018350000  |

**14Ge<sub>v</sub>** (T.E.= -3662.335067)

|   |              |              |              |
|---|--------------|--------------|--------------|
| 6 | -2.424852000 | 0.823386000  | -0.709260000 |
| 6 | -2.356510000 | -0.220253000 | 0.279415000  |
| 7 | -0.321263000 | 1.499894000  | 0.538399000  |
| 6 | 1.007190000  | 1.903261000  | 0.682157000  |
| 6 | 1.826632000  | 2.084737000  | -0.437364000 |
| 6 | 3.156372000  | 2.435354000  | -0.297918000 |
| 6 | 3.714428000  | 2.596432000  | 0.961825000  |
| 6 | 2.917633000  | 2.407054000  | 2.079371000  |
| 6 | 1.581731000  | 2.069967000  | 1.943510000  |
| 1 | 1.397256000  | 1.938588000  | -1.424073000 |
| 1 | 3.767301000  | 2.571295000  | -1.184130000 |
| 1 | 4.758177000  | 2.865904000  | 1.070063000  |
| 1 | 3.337347000  | 2.530638000  | 3.071635000  |
| 1 | 0.959429000  | 1.938165000  | 2.822950000  |
| 5 | -1.271176000 | 1.936969000  | -0.453862000 |
| 7 | -1.285443000 | 3.211019000  | -1.055999000 |
| 6 | -2.147353000 | 3.565159000  | -2.163306000 |
| 1 | -2.806027000 | 4.398489000  | -1.888841000 |

|    |              |              |              |
|----|--------------|--------------|--------------|
| 1  | -1.547559000 | 3.895184000  | -3.021079000 |
| 1  | -2.756412000 | 2.712653000  | -2.455061000 |
| 6  | -0.467780000 | 4.325411000  | -0.639032000 |
| 1  | 0.302726000  | 4.566373000  | -1.383265000 |
| 1  | -1.094699000 | 5.216027000  | -0.516863000 |
| 1  | 0.028500000  | 4.127158000  | 0.308955000  |
| 15 | -3.484221000 | -1.498007000 | 0.155412000  |
| 6  | -3.364675000 | -2.434514000 | -1.379569000 |
| 1  | -4.108788000 | -3.233007000 | -1.402291000 |
| 1  | -3.525475000 | -1.753115000 | -2.214587000 |
| 1  | -2.363827000 | -2.863040000 | -1.454963000 |
| 6  | -5.206167000 | -0.984398000 | 0.271374000  |
| 1  | -5.872854000 | -1.841292000 | 0.158530000  |
| 1  | -5.375688000 | -0.512585000 | 1.239698000  |
| 1  | -5.396025000 | -0.257837000 | -0.518794000 |
| 6  | -3.232075000 | -2.701228000 | 1.468187000  |
| 1  | -2.233356000 | -3.133978000 | 1.386280000  |
| 1  | -3.327331000 | -2.217793000 | 2.441266000  |
| 1  | -3.973888000 | -3.497568000 | 1.387748000  |
| 8  | -3.276626000 | 0.840060000  | -1.612780000 |
| 32 | -0.848232000 | -0.101604000 | 1.449192000  |
| 1  | 0.847094000  | -0.832820000 | -0.477897000 |
| 14 | 2.105770000  | -1.605454000 | -0.677607000 |
| 6  | 3.307805000  | -1.264540000 | 0.721776000  |
| 1  | 3.528035000  | -0.190693000 | 0.731175000  |
| 1  | 4.254825000  | -1.761552000 | 0.480393000  |
| 6  | 1.615915000  | -3.421039000 | -0.669649000 |
| 1  | 0.922286000  | -3.585607000 | -1.502152000 |
| 1  | 1.040841000  | -3.617882000 | 0.243860000  |
| 6  | 2.839386000  | -1.111892000 | -2.342033000 |
| 1  | 2.341414000  | -1.711385000 | -3.113154000 |
| 1  | 2.550880000  | -0.074370000 | -2.541053000 |
| 6  | 4.351038000  | -1.255535000 | -2.451534000 |
| 1  | 4.713944000  | -1.002991000 | -3.450848000 |
| 1  | 4.862979000  | -0.597279000 | -1.744679000 |
| 1  | 4.682255000  | -2.275376000 | -2.234970000 |
| 6  | 2.802252000  | -4.368613000 | -0.770648000 |
| 1  | 3.494877000  | -4.229307000 | 0.064683000  |
| 1  | 2.501664000  | -5.419146000 | -0.770500000 |
| 1  | 3.370338000  | -4.195703000 | -1.689540000 |

|   |             |              |             |
|---|-------------|--------------|-------------|
| 6 | 2.814970000 | -1.718849000 | 2.087855000 |
| 1 | 2.646953000 | -2.799680000 | 2.114028000 |
| 1 | 3.530735000 | -1.481724000 | 2.879167000 |
| 1 | 1.868216000 | -1.238071000 | 2.353272000 |

**IX<sub>v</sub>** (T.E.= -2608.085414)

|    |              |              |              |
|----|--------------|--------------|--------------|
| 6  | 3.076129000  | 0.174319000  | 0.483316000  |
| 6  | 2.665337000  | 1.464780000  | -0.216656000 |
| 6  | 1.139696000  | 1.670412000  | -0.045598000 |
| 6  | 2.041264000  | -0.930167000 | 0.158206000  |
| 1  | 4.099400000  | -0.114106000 | 0.207319000  |
| 1  | 3.107999000  | 0.354905000  | 1.565150000  |
| 1  | 2.919992000  | 1.382512000  | -1.280422000 |
| 1  | 3.250787000  | 2.316620000  | 0.155315000  |
| 14 | 0.354607000  | -0.063192000 | -0.004483000 |
| 14 | 2.533124000  | -1.918916000 | -1.378668000 |
| 14 | 1.765990000  | -2.094687000 | 1.630407000  |
| 14 | 0.339571000  | 2.429902000  | -1.588940000 |
| 14 | 0.749378000  | 2.728543000  | 1.472871000  |
| 6  | 1.348843000  | 3.870088000  | -2.238627000 |
| 1  | 2.358527000  | 3.545835000  | -2.503370000 |
| 1  | 0.877199000  | 4.247344000  | -3.150459000 |
| 1  | 1.432328000  | 4.696900000  | -1.533261000 |
| 6  | -1.441186000 | 2.929943000  | -1.282632000 |
| 1  | -1.898130000 | 3.210972000  | -2.235670000 |
| 1  | -2.006314000 | 2.081787000  | -0.882839000 |
| 1  | -1.560338000 | 3.768474000  | -0.594946000 |
| 6  | 0.254651000  | 1.210449000  | -3.022648000 |
| 1  | -0.099696000 | 1.756222000  | -3.902621000 |
| 1  | 1.220449000  | 0.773634000  | -3.283159000 |
| 1  | -0.452604000 | 0.395517000  | -2.844762000 |
| 6  | -0.958624000 | 2.402080000  | 2.174357000  |
| 1  | -1.057215000 | 2.938747000  | 3.122251000  |
| 1  | -1.748388000 | 2.759150000  | 1.510371000  |
| 1  | -1.143577000 | 1.341863000  | 2.370675000  |
| 6  | 1.991101000  | 2.452508000  | 2.853206000  |
| 1  | 1.754120000  | 3.162854000  | 3.650986000  |
| 1  | 1.952760000  | 1.452325000  | 3.283620000  |
| 1  | 3.016897000  | 2.649965000  | 2.534430000  |
| 6  | 0.887140000  | 4.573046000  | 1.136173000  |

|    |              |              |              |
|----|--------------|--------------|--------------|
| 1  | 1.888327000  | 4.835805000  | 0.783443000  |
| 1  | 0.160716000  | 4.955309000  | 0.417145000  |
| 1  | 0.725224000  | 5.098709000  | 2.082164000  |
| 6  | 3.546228000  | -0.887978000 | -2.580563000 |
| 1  | 3.020775000  | -0.031930000 | -3.003968000 |
| 1  | 4.468565000  | -0.524392000 | -2.121115000 |
| 1  | 3.831509000  | -1.541824000 | -3.410254000 |
| 6  | 3.678340000  | -3.359498000 | -0.998163000 |
| 1  | 3.232093000  | -4.134345000 | -0.372987000 |
| 1  | 3.961597000  | -3.821321000 | -1.948762000 |
| 1  | 4.596070000  | -3.016398000 | -0.512484000 |
| 6  | 1.047210000  | -2.588030000 | -2.303291000 |
| 1  | 0.407903000  | -1.785715000 | -2.682321000 |
| 1  | 1.392132000  | -3.169462000 | -3.163148000 |
| 1  | 0.426606000  | -3.241406000 | -1.686410000 |
| 6  | 0.897823000  | -1.223915000 | 3.057122000  |
| 1  | 1.537945000  | -0.495772000 | 3.557898000  |
| 1  | -0.035316000 | -0.728164000 | 2.771921000  |
| 1  | 0.638459000  | -1.985238000 | 3.799344000  |
| 6  | 3.395515000  | -2.687823000 | 2.341947000  |
| 1  | 3.211232000  | -3.141343000 | 3.319972000  |
| 1  | 3.891988000  | -3.427447000 | 1.714369000  |
| 1  | 4.084771000  | -1.852789000 | 2.490651000  |
| 6  | 0.661008000  | -3.544018000 | 1.194072000  |
| 1  | 1.042893000  | -4.173765000 | 0.389606000  |
| 1  | 0.543385000  | -4.172658000 | 2.081189000  |
| 1  | -0.334282000 | -3.190002000 | 0.909322000  |
| 1  | -2.652042000 | -1.221149000 | 1.425782000  |
| 14 | -3.774142000 | -0.925494000 | 0.490048000  |
| 6  | -3.196786000 | -1.211808000 | -1.273033000 |
| 1  | -4.013757000 | -0.965992000 | -1.960869000 |
| 1  | -2.395545000 | -0.490340000 | -1.475629000 |
| 6  | -4.321167000 | 0.863425000  | 0.715599000  |
| 1  | -5.002984000 | 0.900863000  | 1.573208000  |
| 1  | -3.444976000 | 1.450005000  | 1.012823000  |
| 6  | -5.177177000 | -2.107597000 | 0.904707000  |
| 1  | -4.788597000 | -3.131282000 | 0.863442000  |
| 1  | -5.458370000 | -1.939813000 | 1.950289000  |
| 6  | -6.393767000 | -1.964437000 | 0.001648000  |
| 1  | -7.187429000 | -2.670242000 | 0.258746000  |



|   |              |              |              |
|---|--------------|--------------|--------------|
| 1 | -6.822203000 | -0.960147000 | 0.066902000  |
| 1 | -6.137347000 | -2.136002000 | -1.048274000 |
| 6 | -4.973189000 | 1.496514000  | -0.507107000 |
| 1 | -5.310975000 | 2.516439000  | -0.306670000 |
| 1 | -4.276093000 | 1.549095000  | -1.347854000 |
| 1 | -5.841692000 | 0.927354000  | -0.849146000 |
| 6 | -2.705337000 | -2.630289000 | -1.511830000 |
| 1 | -1.894964000 | -2.886724000 | -0.821612000 |
| 1 | -3.503296000 | -3.362441000 | -1.357785000 |
| 1 | -2.324222000 | -2.775188000 | -2.526069000 |

Cartesian coordinates of the transition states involved in the activation of Si – H bond of SiEt<sub>3</sub>H by CAASi (**1Si-5Si**, **8Si-9Si** and **14Si**), CAAGe (**1Ge-5Ge**, **8Ge-9Ge** and **14Ge**) and **IX**, along with their total energies (in hartrees) including zero point vibrational correction.

**1SiTS<sup>Si-H</sup>** (T.E.= -2037.983570)

|    |              |              |              |
|----|--------------|--------------|--------------|
| 6  | 0.195281000  | -1.721960000 | -1.688074000 |
| 6  | -1.244485000 | -1.891112000 | -1.226295000 |
| 6  | -1.680931000 | -0.710479000 | -0.297922000 |
| 1  | 0.599616000  | -2.668976000 | -2.061841000 |
| 1  | 0.254276000  | -0.987950000 | -2.509849000 |
| 1  | -1.296397000 | -2.841763000 | -0.683062000 |
| 1  | -1.917113000 | -2.000691000 | -2.085285000 |
| 7  | 0.928585000  | -1.282266000 | -0.516523000 |
| 14 | 0.005432000  | -0.028630000 | 0.307113000  |
| 14 | -2.710046000 | 0.516892000  | -1.283115000 |
| 14 | -2.536823000 | -1.446464000 | 1.216195000  |
| 6  | -3.356564000 | -0.150509000 | 2.291060000  |
| 1  | -4.175244000 | 0.365657000  | 1.784333000  |
| 1  | -3.772324000 | -0.638056000 | 3.177194000  |
| 1  | -2.636808000 | 0.596662000  | 2.634527000  |
| 6  | -1.277729000 | -2.334934000 | 2.291912000  |
| 1  | -0.570793000 | -1.633125000 | 2.744740000  |
| 1  | -1.801006000 | -2.846284000 | 3.104911000  |
| 1  | -0.702140000 | -3.083784000 | 1.742505000  |
| 6  | -3.838983000 | -2.708497000 | 0.728837000  |
| 1  | -4.176935000 | -3.232170000 | 1.627547000  |
| 1  | -4.711978000 | -2.241501000 | 0.270604000  |
| 1  | -3.457007000 | -3.461155000 | 0.035557000  |
| 6  | -2.865563000 | 2.189837000  | -0.454082000 |

|    |              |              |              |
|----|--------------|--------------|--------------|
| 1  | -3.597714000 | 2.786168000  | -1.005846000 |
| 1  | -3.200886000 | 2.127597000  | 0.583025000  |
| 1  | -1.921072000 | 2.738327000  | -0.475793000 |
| 6  | -1.995077000 | 0.815402000  | -2.994650000 |
| 1  | -1.038120000 | 1.340285000  | -2.960652000 |
| 1  | -1.854757000 | -0.109319000 | -3.559119000 |
| 1  | -2.697985000 | 1.439124000  | -3.554865000 |
| 6  | -4.449483000 | -0.136818000 | -1.561741000 |
| 1  | -5.039400000 | -0.157485000 | -0.642392000 |
| 1  | -4.964852000 | 0.519590000  | -2.268472000 |
| 1  | -4.448960000 | -1.144420000 | -1.985490000 |
| 6  | 2.283495000  | -1.558102000 | -0.375553000 |
| 6  | 3.135683000  | -1.687284000 | -1.474042000 |
| 6  | 2.827349000  | -1.712543000 | 0.902678000  |
| 6  | 4.487699000  | -1.927882000 | -1.291277000 |
| 1  | 2.738375000  | -1.572165000 | -2.476557000 |
| 6  | 4.176916000  | -1.942065000 | 1.077097000  |
| 1  | 2.166579000  | -1.649289000 | 1.761800000  |
| 6  | 5.021346000  | -2.046585000 | -0.019340000 |
| 1  | 5.132123000  | -2.014869000 | -2.159080000 |
| 1  | 4.573100000  | -2.051746000 | 2.080756000  |
| 1  | 6.079860000  | -2.232096000 | 0.117419000  |
| 14 | 1.160193000  | 2.101880000  | 0.211932000  |
| 6  | 2.807229000  | 1.685793000  | 1.028435000  |
| 1  | 3.287085000  | 0.867969000  | 0.480930000  |
| 1  | 3.425839000  | 2.574611000  | 0.840159000  |
| 6  | 2.740905000  | 1.378544000  | 2.511037000  |
| 1  | 3.706202000  | 1.048161000  | 2.902509000  |
| 1  | 2.435298000  | 2.256202000  | 3.086945000  |
| 1  | 2.012195000  | 0.587616000  | 2.715576000  |
| 6  | 0.190451000  | 3.367323000  | 1.204051000  |
| 1  | 0.974960000  | 4.085126000  | 1.486566000  |
| 1  | -0.462879000 | 3.915312000  | 0.517265000  |
| 6  | -0.577916000 | 2.917475000  | 2.430812000  |
| 1  | 0.056633000  | 2.369444000  | 3.130586000  |
| 1  | -1.014460000 | 3.763343000  | 2.966953000  |
| 1  | -1.393631000 | 2.247747000  | 2.151121000  |
| 6  | 1.617568000  | 2.918780000  | -1.425224000 |
| 1  | 0.696634000  | 3.292638000  | -1.889186000 |
| 1  | 2.224082000  | 3.802468000  | -1.187017000 |

|   |             |             |              |
|---|-------------|-------------|--------------|
| 6 | 2.361712000 | 2.000733000 | -2.381183000 |
| 1 | 2.589961000 | 2.487160000 | -3.332176000 |
| 1 | 3.307902000 | 1.652466000 | -1.957313000 |
| 1 | 1.768312000 | 1.107822000 | -2.608513000 |
| 1 | 0.107336000 | 1.088985000 | -0.914328000 |

**2SiTS<sup>Si-H</sup> (T.E.= -2036.788599)**

|    |              |              |              |
|----|--------------|--------------|--------------|
| 6  | 1.860680000  | -0.435103000 | -0.277808000 |
| 6  | 1.552627000  | -1.356014000 | -1.431079000 |
| 6  | 0.333669000  | -1.905210000 | -1.467140000 |
| 1  | 2.314518000  | -1.624579000 | -2.156443000 |
| 1  | 0.018840000  | -2.642927000 | -2.196574000 |
| 7  | -0.542317000 | -1.557606000 | -0.442748000 |
| 14 | 2.700254000  | 1.148380000  | -0.851523000 |
| 14 | 2.838868000  | -1.451195000 | 0.995369000  |
| 6  | 4.491479000  | 0.844975000  | -1.322167000 |
| 1  | 4.907445000  | 1.757415000  | -1.758502000 |
| 1  | 5.111653000  | 0.574957000  | -0.464453000 |
| 1  | 4.581233000  | 0.052086000  | -2.069528000 |
| 6  | 2.676364000  | 2.453803000  | 0.499130000  |
| 1  | 3.479147000  | 2.280950000  | 1.218386000  |
| 1  | 2.825430000  | 3.446223000  | 0.064838000  |
| 1  | 1.736608000  | 2.474581000  | 1.056557000  |
| 6  | 1.874244000  | 1.792669000  | -2.405692000 |
| 1  | 2.350106000  | 2.730533000  | -2.706400000 |
| 1  | 1.999205000  | 1.075896000  | -3.221220000 |
| 1  | 0.803909000  | 1.973985000  | -2.289889000 |
| 6  | 3.522777000  | -0.358896000 | 2.355882000  |
| 1  | 3.914747000  | -0.985266000 | 3.161526000  |
| 1  | 4.338093000  | 0.276485000  | 2.003360000  |
| 1  | 2.748418000  | 0.286110000  | 2.779657000  |
| 6  | 1.744600000  | -2.746760000 | 1.801738000  |
| 1  | 0.961617000  | -2.309833000 | 2.427627000  |
| 1  | 1.269240000  | -3.395379000 | 1.062581000  |
| 1  | 2.366635000  | -3.374569000 | 2.446792000  |
| 6  | 4.239324000  | -2.381638000 | 0.169487000  |
| 1  | 3.851090000  | -3.091271000 | -0.564695000 |
| 1  | 4.951650000  | -1.726121000 | -0.333434000 |
| 1  | 4.784101000  | -2.952857000 | 0.926229000  |
| 6  | -1.850555000 | -2.033149000 | -0.370679000 |

|    |              |              |              |
|----|--------------|--------------|--------------|
| 6  | -2.584636000 | -2.371357000 | -1.508133000 |
| 6  | -2.469593000 | -2.147926000 | 0.876212000  |
| 6  | -3.900098000 | -2.787064000 | -1.396405000 |
| 1  | -2.134155000 | -2.274442000 | -2.489427000 |
| 6  | -3.787005000 | -2.550535000 | 0.977330000  |
| 1  | -1.892904000 | -1.920799000 | 1.767718000  |
| 6  | -4.515460000 | -2.871109000 | -0.158631000 |
| 1  | -4.454346000 | -3.034479000 | -2.294991000 |
| 1  | -4.245598000 | -2.627306000 | 1.956861000  |
| 1  | -5.548167000 | -3.187849000 | -0.078646000 |
| 6  | -0.758576000 | 3.399374000  | 0.158475000  |
| 1  | -0.385101000 | 3.768417000  | 1.120899000  |
| 1  | 0.111293000  | 3.341496000  | -0.500610000 |
| 6  | -2.883866000 | 1.230063000  | -0.725609000 |
| 1  | -3.309330000 | 0.278468000  | -0.383733000 |
| 1  | -3.665505000 | 1.980673000  | -0.553160000 |
| 6  | -2.152101000 | 1.617488000  | 2.206155000  |
| 1  | -2.550224000 | 0.610612000  | 2.370920000  |
| 1  | -1.289848000 | 1.716557000  | 2.873974000  |
| 6  | -3.202297000 | 2.675636000  | 2.513594000  |
| 1  | -4.070105000 | 2.593150000  | 1.853824000  |
| 1  | -3.570619000 | 2.590353000  | 3.539054000  |
| 1  | -2.800063000 | 3.685824000  | 2.400591000  |
| 6  | -2.532875000 | 1.158933000  | -2.201096000 |
| 1  | -3.398713000 | 0.887526000  | -2.810109000 |
| 1  | -2.154335000 | 2.114712000  | -2.575596000 |
| 1  | -1.754430000 | 0.414021000  | -2.391050000 |
| 6  | -1.772149000 | 4.382707000  | -0.418699000 |
| 1  | -1.342238000 | 5.381743000  | -0.519813000 |
| 1  | -2.109676000 | 4.073014000  | -1.410549000 |
| 1  | -2.662536000 | 4.475573000  | 0.207319000  |
| 1  | -0.343734000 | 0.947414000  | -0.669945000 |
| 14 | -1.480383000 | 1.676997000  | 0.441778000  |
| 14 | 0.136514000  | -0.188696000 | 0.489384000  |

**3SiTS<sup>Si-H</sup>** (T.E.= -2158.088133)

|   |              |             |              |
|---|--------------|-------------|--------------|
| 6 | -1.514975000 | 2.008227000 | -0.373807000 |
| 6 | -1.744861000 | 0.466585000 | -0.184923000 |
| 1 | -1.733715000 | 2.303943000 | -1.412284000 |
| 1 | -2.230524000 | 2.580803000 | 0.228765000  |

|    |              |              |              |
|----|--------------|--------------|--------------|
| 14 | -0.005524000 | -0.203922000 | -0.578941000 |
| 7  | 0.866666000  | 1.278908000  | -0.167653000 |
| 5  | -0.005853000 | 2.416466000  | -0.082880000 |
| 7  | 0.374140000  | 3.755992000  | 0.172383000  |
| 6  | -0.550279000 | 4.857478000  | 0.044241000  |
| 1  | -0.731120000 | 5.342623000  | 1.012627000  |
| 1  | -0.147158000 | 5.623554000  | -0.630203000 |
| 1  | -1.507151000 | 4.532358000  | -0.359200000 |
| 6  | 1.678013000  | 4.217909000  | 0.587179000  |
| 1  | 1.578932000  | 4.891558000  | 1.446720000  |
| 1  | 2.323688000  | 3.395630000  | 0.884619000  |
| 1  | 2.183702000  | 4.779016000  | -0.209912000 |
| 14 | -2.971667000 | -0.120019000 | -1.486506000 |
| 14 | -2.268141000 | 0.212249000  | 1.603089000  |
| 6  | -2.150313000 | -0.105713000 | -3.177356000 |
| 1  | -1.608606000 | 0.825069000  | -3.368774000 |
| 1  | -1.439084000 | -0.929749000 | -3.280733000 |
| 1  | -2.908617000 | -0.214268000 | -3.957904000 |
| 6  | -4.462142000 | 1.016915000  | -1.581009000 |
| 1  | -4.181452000 | 2.055499000  | -1.769092000 |
| 1  | -5.101995000 | 0.693065000  | -2.406861000 |
| 1  | -5.058805000 | 0.989316000  | -0.667599000 |
| 6  | -3.972550000 | 0.947814000  | 1.914079000  |
| 1  | -4.761284000 | 0.323324000  | 1.486401000  |
| 1  | -4.142696000 | 0.993653000  | 2.993781000  |
| 1  | -4.087674000 | 1.958679000  | 1.516885000  |
| 6  | -2.404316000 | -1.576160000 | 2.150760000  |
| 1  | -2.782109000 | -1.582058000 | 3.177857000  |
| 1  | -3.105863000 | -2.146847000 | 1.539382000  |
| 1  | -1.447175000 | -2.098277000 | 2.154339000  |
| 6  | -3.604007000 | -1.857537000 | -1.183009000 |
| 1  | -4.263180000 | -1.905564000 | -0.313099000 |
| 1  | -4.179990000 | -2.187281000 | -2.052065000 |
| 1  | -2.790572000 | -2.572090000 | -1.033597000 |
| 6  | -1.087866000 | 1.100391000  | 2.764217000  |
| 1  | -0.046167000 | 0.804993000  | 2.617906000  |
| 1  | -1.148671000 | 2.185698000  | 2.646605000  |
| 1  | -1.363617000 | 0.864326000  | 3.796128000  |
| 6  | 2.276045000  | 1.242359000  | -0.195139000 |
| 6  | 2.976710000  | 1.602581000  | -1.341636000 |

|    |              |              |              |
|----|--------------|--------------|--------------|
| 6  | 2.985721000  | 0.807145000  | 0.919756000  |
| 6  | 4.359138000  | 1.542396000  | -1.366502000 |
| 1  | 2.415065000  | 1.932651000  | -2.209741000 |
| 6  | 4.368678000  | 0.744053000  | 0.892300000  |
| 1  | 2.434150000  | 0.534221000  | 1.815335000  |
| 6  | 5.060700000  | 1.112368000  | -0.250352000 |
| 1  | 4.893096000  | 1.829034000  | -2.265334000 |
| 1  | 4.908286000  | 0.406129000  | 1.770014000  |
| 1  | 6.142692000  | 1.062768000  | -0.272443000 |
| 1  | 0.314806000  | -1.032424000 | 0.949966000  |
| 14 | 1.136339000  | -2.256484000 | 0.095617000  |
| 6  | 2.561565000  | -2.290315000 | -1.148777000 |
| 1  | 3.142094000  | -3.183638000 | -0.878865000 |
| 1  | 3.215054000  | -1.438699000 | -0.925407000 |
| 6  | 2.022636000  | -2.715567000 | 1.706557000  |
| 1  | 2.459637000  | -3.707758000 | 1.534620000  |
| 1  | 2.879568000  | -2.036926000 | 1.797466000  |
| 6  | -0.188492000 | -3.523798000 | -0.324106000 |
| 1  | -1.085236000 | -3.347009000 | 0.277725000  |
| 1  | -0.483670000 | -3.363836000 | -1.366346000 |
| 6  | 2.184336000  | -2.318922000 | -2.614255000 |
| 1  | 1.559339000  | -1.459185000 | -2.874320000 |
| 1  | 3.063704000  | -2.297264000 | -3.262361000 |
| 1  | 1.615693000  | -3.219546000 | -2.864755000 |
| 6  | 1.199595000  | -2.706822000 | 2.979736000  |
| 1  | 0.366897000  | -3.415066000 | 2.926471000  |
| 1  | 1.792047000  | -2.973382000 | 3.858321000  |
| 1  | 0.767035000  | -1.718246000 | 3.166214000  |
| 6  | 0.310059000  | -4.950031000 | -0.129086000 |
| 1  | -0.422704000 | -5.683780000 | -0.471941000 |
| 1  | 1.235075000  | -5.131728000 | -0.685241000 |
| 1  | 0.517440000  | -5.163584000 | 0.922363000  |

**4SiTS<sup>Si-H</sup> (T.E. = -2367.998615)**

|    |              |              |              |
|----|--------------|--------------|--------------|
| 6  | 1.704522000  | -1.459761000 | 1.318406000  |
| 6  | 1.814232000  | -0.484438000 | 0.097833000  |
| 1  | 2.158999000  | -2.434425000 | 1.098488000  |
| 1  | 2.254731000  | -1.086102000 | 2.189920000  |
| 14 | 0.064638000  | 0.046647000  | -0.468872000 |
| 7  | -0.899362000 | -1.156497000 | 0.386487000  |

|    |              |              |              |
|----|--------------|--------------|--------------|
| 14 | 2.449655000  | -1.474339000 | -1.388518000 |
| 14 | 2.922072000  | 0.971135000  | 0.538932000  |
| 6  | 1.212145000  | -2.811491000 | -1.853875000 |
| 1  | 0.260194000  | -2.419250000 | -2.218045000 |
| 1  | 1.645527000  | -3.414698000 | -2.657066000 |
| 1  | 0.997853000  | -3.483674000 | -1.018712000 |
| 6  | 4.051028000  | -2.385918000 | -1.024111000 |
| 1  | 4.203170000  | -3.134727000 | -1.806640000 |
| 1  | 4.919164000  | -1.726427000 | -1.022691000 |
| 1  | 4.029191000  | -2.913186000 | -0.067944000 |
| 6  | 4.728635000  | 0.478117000  | 0.663932000  |
| 1  | 5.182854000  | 0.312901000  | -0.315242000 |
| 1  | 5.281354000  | 1.284847000  | 1.153605000  |
| 1  | 4.864589000  | -0.428312000 | 1.259100000  |
| 6  | 2.826349000  | 2.367136000  | -0.713453000 |
| 1  | 3.314558000  | 3.252642000  | -0.295962000 |
| 1  | 3.343362000  | 2.109763000  | -1.639365000 |
| 1  | 1.806551000  | 2.651298000  | -0.980178000 |
| 6  | 2.724403000  | -0.390077000 | -2.893664000 |
| 1  | 3.621552000  | 0.225088000  | -2.791479000 |
| 1  | 2.859080000  | -1.023329000 | -3.774710000 |
| 1  | 1.874820000  | 0.272117000  | -3.083727000 |
| 6  | 2.489687000  | 1.662875000  | 2.232215000  |
| 1  | 1.442569000  | 1.950986000  | 2.334386000  |
| 1  | 2.721072000  | 0.953901000  | 3.031033000  |
| 1  | 3.099905000  | 2.554932000  | 2.402612000  |
| 14 | -0.090143000 | -1.758204000 | 1.811947000  |
| 6  | -0.504566000 | -0.759527000 | 3.338508000  |
| 1  | -0.418722000 | 0.309969000  | 3.124020000  |
| 1  | -1.516259000 | -0.949459000 | 3.703596000  |
| 1  | 0.193094000  | -0.990834000 | 4.148001000  |
| 6  | -0.436684000 | -3.571442000 | 2.085412000  |
| 1  | -0.328024000 | -4.121990000 | 1.146978000  |
| 1  | 0.278587000  | -3.982617000 | 2.802282000  |
| 1  | -1.440194000 | -3.757453000 | 2.471073000  |
| 6  | -2.192086000 | -1.508587000 | -0.018006000 |
| 6  | -3.186876000 | -1.805253000 | 0.916300000  |
| 6  | -2.541152000 | -1.556010000 | -1.370516000 |
| 6  | -4.472236000 | -2.124741000 | 0.516597000  |
| 1  | -2.954808000 | -1.747665000 | 1.974736000  |

|    |              |              |              |
|----|--------------|--------------|--------------|
| 6  | -3.829681000 | -1.861642000 | -1.765574000 |
| 1  | -1.789720000 | -1.323621000 | -2.118396000 |
| 6  | -4.807975000 | -2.149281000 | -0.826467000 |
| 1  | -5.222768000 | -2.341807000 | 1.268549000  |
| 1  | -4.069212000 | -1.880685000 | -2.822969000 |
| 1  | -5.817025000 | -2.390861000 | -1.137662000 |
| 1  | -0.100976000 | 1.258407000  | 0.761220000  |
| 14 | -1.001755000 | 2.273101000  | -0.284615000 |
| 6  | -0.934362000 | 2.894837000  | -2.068302000 |
| 1  | -1.446849000 | 3.866511000  | -2.043691000 |
| 1  | 0.107313000  | 3.117086000  | -2.326318000 |
| 6  | -2.752432000 | 1.792553000  | 0.190915000  |
| 1  | -2.748307000 | 1.466232000  | 1.237399000  |
| 1  | -3.081830000 | 0.926199000  | -0.388801000 |
| 6  | -0.427226000 | 3.737000000  | 0.767461000  |
| 1  | -0.824567000 | 4.648980000  | 0.306004000  |
| 1  | 0.662467000  | 3.817457000  | 0.682055000  |
| 6  | -1.561335000 | 1.982934000  | -3.102377000 |
| 1  | -2.615812000 | 1.790970000  | -2.881468000 |
| 1  | -1.508336000 | 2.406854000  | -4.107705000 |
| 1  | -1.054765000 | 1.013212000  | -3.119959000 |
| 6  | -3.718565000 | 2.953970000  | -0.011925000 |
| 1  | -3.778613000 | 3.246581000  | -1.063630000 |
| 1  | -4.729923000 | 2.690637000  | 0.305388000  |
| 1  | -3.423128000 | 3.842405000  | 0.553316000  |
| 6  | -0.839549000 | 3.658700000  | 2.228403000  |
| 1  | -0.377852000 | 4.445048000  | 2.829813000  |
| 1  | -1.921994000 | 3.753120000  | 2.343469000  |
| 1  | -0.557558000 | 2.701972000  | 2.679386000  |

**5SiTS<sup>Si-H</sup>** (T.E.= -2112.045659)

|    |              |              |              |
|----|--------------|--------------|--------------|
| 6  | 1.949094000  | -2.025055000 | 0.017430000  |
| 6  | 1.952214000  | -0.473775000 | -0.070949000 |
| 1  | 2.336695000  | -2.486301000 | -0.901331000 |
| 1  | 2.585783000  | -2.411190000 | 0.820501000  |
| 14 | 0.169671000  | -0.109994000 | -0.670208000 |
| 7  | -0.394502000 | -1.756444000 | -0.266173000 |
| 14 | 3.162389000  | 0.064032000  | -1.414582000 |
| 14 | 2.277068000  | 0.169948000  | 1.676128000  |
| 6  | 2.499178000  | -0.477946000 | -3.085415000 |



|    |              |              |              |
|----|--------------|--------------|--------------|
| 1  | 1.621034000  | 0.103399000  | -3.376688000 |
| 1  | 3.267072000  | -0.331421000 | -3.849981000 |
| 1  | 2.220290000  | -1.535300000 | -3.101474000 |
| 6  | 4.841389000  | -0.739558000 | -1.201108000 |
| 1  | 5.446010000  | -0.534618000 | -2.088801000 |
| 1  | 5.380528000  | -0.355573000 | -0.334545000 |
| 1  | 4.769293000  | -1.824783000 | -1.097945000 |
| 6  | 4.064924000  | -0.147229000 | 2.153464000  |
| 1  | 4.740783000  | 0.543765000  | 1.643190000  |
| 1  | 4.181574000  | 0.014866000  | 3.228624000  |
| 1  | 4.392878000  | -1.165773000 | 1.933537000  |
| 6  | 1.990045000  | 2.006834000  | 1.924934000  |
| 1  | 2.385662000  | 2.268690000  | 2.910898000  |
| 1  | 2.504301000  | 2.629688000  | 1.190407000  |
| 1  | 0.931043000  | 2.272998000  | 1.921268000  |
| 6  | 3.372154000  | 1.922919000  | -1.442539000 |
| 1  | 3.866293000  | 2.292937000  | -0.540809000 |
| 1  | 3.984941000  | 2.213317000  | -2.299663000 |
| 1  | 2.408041000  | 2.431075000  | -1.538295000 |
| 6  | 1.191016000  | -0.738359000 | 2.907698000  |
| 1  | 0.128637000  | -0.539669000 | 2.741814000  |
| 1  | 1.341017000  | -1.820438000 | 2.895867000  |
| 1  | 1.438581000  | -0.383571000 | 3.912229000  |
| 6  | -1.771502000 | -2.085335000 | -0.210509000 |
| 6  | -2.501781000 | -2.218315000 | -1.382279000 |
| 6  | -2.408751000 | -2.206041000 | 1.017941000  |
| 6  | -3.864004000 | -2.458763000 | -1.327015000 |
| 1  | -1.990319000 | -2.121993000 | -2.334298000 |
| 6  | -3.770465000 | -2.444949000 | 1.069486000  |
| 1  | -1.821307000 | -2.111569000 | 1.925653000  |
| 6  | -4.501995000 | -2.566813000 | -0.102234000 |
| 1  | -4.429342000 | -2.559790000 | -2.246137000 |
| 1  | -4.263535000 | -2.537034000 | 2.030259000  |
| 1  | -5.568556000 | -2.753118000 | -0.059419000 |
| 6  | 0.564290000  | -2.616487000 | 0.198441000  |
| 8  | 0.361767000  | -3.724933000 | 0.640754000  |
| 1  | -0.358244000 | 0.553031000  | 0.764032000  |
| 14 | -1.502564000 | 1.585342000  | -0.136260000 |
| 6  | -0.492001000 | 3.123103000  | -0.512620000 |
| 1  | -0.483301000 | 3.230071000  | -1.602820000 |

|   |              |             |              |
|---|--------------|-------------|--------------|
| 1 | 0.548309000  | 2.948277000 | -0.223692000 |
| 6 | -2.836975000 | 1.272601000 | -1.437899000 |
| 1 | -3.504302000 | 0.484004000 | -1.069398000 |
| 1 | -2.352806000 | 0.871210000 | -2.331234000 |
| 6 | -3.619264000 | 2.533393000 | -1.791559000 |
| 1 | -4.384511000 | 2.323447000 | -2.542719000 |
| 1 | -4.125713000 | 2.967155000 | -0.927454000 |
| 1 | -2.965197000 | 3.304834000 | -2.206051000 |
| 6 | -1.008316000 | 4.388009000 | 0.160503000  |
| 1 | -0.413679000 | 5.260707000 | -0.117628000 |
| 1 | -2.045844000 | 4.601844000 | -0.110288000 |
| 1 | -0.969381000 | 4.302150000 | 1.249579000  |
| 6 | -2.343181000 | 1.611549000 | 1.559249000  |
| 1 | -1.616576000 | 2.000960000 | 2.282899000  |
| 1 | -2.473350000 | 0.554415000 | 1.823585000  |
| 6 | -3.678288000 | 2.328031000 | 1.689869000  |
| 1 | -4.064799000 | 2.262124000 | 2.709628000  |
| 1 | -3.608066000 | 3.389660000 | 1.439841000  |
| 1 | -4.431122000 | 1.884616000 | 1.033614000  |

**8SiTS<sup>Si-H</sup> (T.E.= -1680.662085)**

|    |              |              |              |
|----|--------------|--------------|--------------|
| 6  | 0.153040000  | -2.397542000 | -1.057981000 |
| 6  | -1.362738000 | -2.426060000 | -0.853672000 |
| 6  | -1.801666000 | -1.076382000 | -0.296235000 |
| 1  | 0.570290000  | -3.409836000 | -1.015617000 |
| 1  | 0.383220000  | -1.987251000 | -2.057129000 |
| 1  | -1.607761000 | -3.247055000 | -0.163111000 |
| 1  | -1.837989000 | -2.674592000 | -1.811603000 |
| 14 | -0.339383000 | -0.184387000 | 0.252934000  |
| 7  | 0.737425000  | -1.557295000 | -0.026621000 |
| 15 | -3.363199000 | -0.858022000 | 0.265502000  |
| 6  | -4.642520000 | -1.008510000 | -1.006911000 |
| 1  | -4.569178000 | -1.993420000 | -1.472527000 |
| 1  | -5.641164000 | -0.893357000 | -0.580691000 |
| 1  | -4.478546000 | -0.249818000 | -1.773465000 |
| 6  | -3.934648000 | -2.044241000 | 1.516567000  |
| 1  | -3.317037000 | -1.944791000 | 2.410264000  |
| 1  | -4.983323000 | -1.882209000 | 1.773936000  |
| 1  | -3.821115000 | -3.058443000 | 1.128978000  |
| 6  | -3.616746000 | 0.764357000  | 0.999284000  |

|    |              |              |              |
|----|--------------|--------------|--------------|
| 1  | -2.857486000 | 0.955845000  | 1.760012000  |
| 1  | -3.547956000 | 1.532571000  | 0.228161000  |
| 1  | -4.606688000 | 0.806087000  | 1.456429000  |
| 6  | 2.107779000  | -1.534967000 | 0.154210000  |
| 6  | 2.997857000  | -2.200604000 | -0.695049000 |
| 6  | 2.650451000  | -0.824463000 | 1.235555000  |
| 6  | 4.365120000  | -2.138772000 | -0.475465000 |
| 1  | 2.622998000  | -2.757249000 | -1.544849000 |
| 6  | 4.011858000  | -0.764876000 | 1.440446000  |
| 1  | 1.973699000  | -0.321136000 | 1.919935000  |
| 6  | 4.887941000  | -1.419946000 | 0.583890000  |
| 1  | 5.030131000  | -2.660499000 | -1.155314000 |
| 1  | 4.395697000  | -0.203530000 | 2.285733000  |
| 1  | 5.957778000  | -1.373748000 | 0.746783000  |
| 1  | 0.150476000  | 0.607431000  | -1.256442000 |
| 14 | 0.472049000  | 2.005299000  | -0.253171000 |
| 6  | 1.802368000  | 2.452043000  | -1.521687000 |
| 1  | 1.317200000  | 2.492416000  | -2.503723000 |
| 1  | 2.129300000  | 3.474533000  | -1.291202000 |
| 6  | 1.193626000  | 2.688830000  | 1.368398000  |
| 1  | 1.386701000  | 3.749261000  | 1.153575000  |
| 1  | 2.179608000  | 2.232595000  | 1.517428000  |
| 6  | -1.106909000 | 2.960013000  | -0.633378000 |
| 1  | -0.779614000 | 4.003952000  | -0.732612000 |
| 1  | -1.757444000 | 2.941894000  | 0.246858000  |
| 6  | 0.337223000  | 2.541296000  | 2.606430000  |
| 1  | 0.094740000  | 1.489285000  | 2.791814000  |
| 1  | 0.827447000  | 2.930307000  | 3.502559000  |
| 1  | -0.614476000 | 3.071603000  | 2.501798000  |
| 6  | 2.998646000  | 1.515848000  | -1.570833000 |
| 1  | 3.733384000  | 1.823538000  | -2.318954000 |
| 1  | 3.514621000  | 1.467156000  | -0.607338000 |
| 1  | 2.692454000  | 0.493399000  | -1.816222000 |
| 6  | -1.863794000 | 2.523408000  | -1.876182000 |
| 1  | -2.181889000 | 1.478361000  | -1.798248000 |
| 1  | -2.753201000 | 3.135156000  | -2.053300000 |
| 1  | -1.237512000 | 2.593564000  | -2.769104000 |

**9SiTS<sup>Si-H</sup>** (T.E.= -1679.471170)

|    |              |              |              |
|----|--------------|--------------|--------------|
| 6  | 0.219271000  | -2.817190000 | -0.495062000 |
| 6  | 1.527369000  | -2.508820000 | -0.594986000 |
| 6  | 1.921087000  | -1.249919000 | 0.019000000  |
| 14 | 0.383454000  | -0.431604000 | 0.502365000  |
| 7  | -0.565923000 | -1.904318000 | 0.222880000  |
| 15 | 3.503119000  | -0.694028000 | 0.126388000  |
| 6  | 4.640862000  | -1.860353000 | 0.907299000  |
| 1  | 4.597591000  | -2.807777000 | 0.366605000  |
| 1  | 5.666320000  | -1.486623000 | 0.890744000  |
| 1  | 4.325989000  | -2.036206000 | 1.936061000  |
| 6  | 3.610773000  | 0.833747000  | 1.068005000  |
| 1  | 4.659363000  | 1.095965000  | 1.217153000  |
| 1  | 3.118584000  | 1.645337000  | 0.529273000  |
| 1  | 3.127509000  | 0.704832000  | 2.037089000  |
| 6  | 4.308095000  | -0.345628000 | -1.457782000 |
| 1  | 3.753183000  | 0.433782000  | -1.982081000 |
| 1  | 5.344581000  | -0.031603000 | -1.319213000 |
| 1  | 4.286481000  | -1.251401000 | -2.067101000 |
| 6  | -1.954899000 | -1.878486000 | 0.121280000  |
| 6  | -2.710382000 | -1.339958000 | 1.165797000  |
| 6  | -2.624288000 | -2.329752000 | -1.017486000 |
| 6  | -4.084656000 | -1.244150000 | 1.068781000  |
| 1  | -2.198344000 | -1.007087000 | 2.062847000  |
| 6  | -4.004037000 | -2.244405000 | -1.099738000 |
| 1  | -2.051126000 | -2.722411000 | -1.849528000 |
| 6  | -4.744319000 | -1.698216000 | -0.064768000 |
| 1  | -4.647515000 | -0.819669000 | 1.892932000  |
| 1  | -4.504012000 | -2.597139000 | -1.995168000 |
| 1  | -5.822892000 | -1.628628000 | -0.137691000 |
| 1  | -0.231715000 | -3.746522000 | -0.821189000 |
| 1  | 2.233842000  | -3.203312000 | -1.040739000 |
| 1  | -0.153637000 | 0.213872000  | -1.102147000 |
| 14 | -0.493666000 | 1.671024000  | -0.222937000 |
| 6  | -0.656602000 | 2.683052000  | 1.382099000  |
| 1  | 0.346810000  | 2.765366000  | 1.818053000  |
| 1  | -0.963065000 | 3.702840000  | 1.112704000  |
| 6  | -2.209126000 | 1.694048000  | -1.012187000 |
| 1  | -2.093868000 | 1.278313000  | -2.018633000 |
| 1  | -2.861490000 | 0.993084000  | -0.478773000 |

|   |              |             |              |
|---|--------------|-------------|--------------|
| 6 | 0.841679000  | 2.501885000 | -1.280162000 |
| 1 | 0.453622000  | 2.481754000 | -2.305867000 |
| 1 | 1.706422000  | 1.826975000 | -1.294653000 |
| 6 | -2.841654000 | 3.076344000 | -1.070541000 |
| 1 | -2.193629000 | 3.796443000 | -1.580890000 |
| 1 | -3.792695000 | 3.064713000 | -1.609190000 |
| 1 | -3.042558000 | 3.475797000 | -0.073712000 |
| 6 | 1.268844000  | 3.909140000 | -0.896769000 |
| 1 | 2.020294000  | 4.308004000 | -1.583363000 |
| 1 | 0.425810000  | 4.604882000 | -0.902329000 |
| 1 | 1.697017000  | 3.942467000 | 0.108603000  |
| 6 | -1.615675000 | 2.090057000 | 2.396245000  |
| 1 | -2.623231000 | 1.971658000 | 1.984352000  |
| 1 | -1.280547000 | 1.093848000 | 2.703654000  |
| 1 | -1.699513000 | 2.698828000 | 3.300060000  |

**14SiTS<sup>Si-H</sup>** (T.E.= -1874.826079)

|   |              |             |              |
|---|--------------|-------------|--------------|
| 6 | -1.806435000 | 1.793906000 | -0.282675000 |
| 6 | -1.892154000 | 0.416850000 | 0.114577000  |
| 7 | 0.601461000  | 1.269992000 | 0.270460000  |
| 6 | 2.008422000  | 1.267161000 | 0.272074000  |
| 6 | 2.721508000  | 1.590789000 | -0.880126000 |
| 6 | 4.104574000  | 1.570992000 | -0.881152000 |
| 6 | 4.801814000  | 1.209413000 | 0.261403000  |
| 6 | 4.099974000  | 0.871638000 | 1.407569000  |
| 6 | 2.716060000  | 0.899685000 | 1.414041000  |
| 1 | 2.169043000  | 1.858827000 | -1.775179000 |
| 1 | 4.642989000  | 1.830513000 | -1.785834000 |
| 1 | 5.885075000  | 1.190718000 | 0.258055000  |
| 1 | 4.633955000  | 0.588372000 | 2.307731000  |
| 1 | 2.161845000  | 0.641844000 | 2.311227000  |
| 5 | -0.283862000 | 2.335595000 | -0.138039000 |
| 7 | 0.070016000  | 3.694106000 | -0.272365000 |
| 6 | -0.791412000 | 4.671118000 | -0.904360000 |
| 1 | -1.026114000 | 5.487202000 | -0.209570000 |
| 1 | -0.288076000 | 5.117913000 | -1.771643000 |
| 1 | -1.722750000 | 4.207475000 | -1.220471000 |
| 6 | 1.305451000  | 4.290027000 | 0.177041000  |
| 1 | 1.970881000  | 4.541964000 | -0.659722000 |
| 1 | 1.087716000  | 5.221525000 | 0.712283000  |

|    |              |              |              |
|----|--------------|--------------|--------------|
| 1  | 1.847972000  | 3.635017000  | 0.855187000  |
| 15 | -3.452370000 | -0.213247000 | 0.392001000  |
| 6  | -4.456695000 | -0.427392000 | -1.088436000 |
| 1  | -5.454440000 | -0.787437000 | -0.829856000 |
| 1  | -4.530822000 | 0.536546000  | -1.591854000 |
| 1  | -3.972257000 | -1.142584000 | -1.754407000 |
| 6  | -4.453827000 | 0.797010000  | 1.496413000  |
| 1  | -5.450403000 | 0.365090000  | 1.604844000  |
| 1  | -3.968649000 | 0.848705000  | 2.471665000  |
| 1  | -4.524358000 | 1.799670000  | 1.076575000  |
| 6  | -3.369093000 | -1.833705000 | 1.167231000  |
| 1  | -2.881450000 | -2.542473000 | 0.497144000  |
| 1  | -2.796589000 | -1.770284000 | 2.093987000  |
| 1  | -4.377027000 | -2.189307000 | 1.387490000  |
| 8  | -2.801684000 | 2.475225000  | -0.590029000 |
| 14 | -0.247038000 | -0.271816000 | 0.488563000  |
| 1  | 0.218082000  | -0.835302000 | -1.124149000 |
| 14 | 0.739364000  | -2.308180000 | -0.417991000 |
| 6  | 2.591754000  | -2.071763000 | -0.607476000 |
| 1  | 2.762879000  | -1.407249000 | -1.459936000 |
| 1  | 2.999800000  | -1.552968000 | 0.264227000  |
| 6  | 0.419077000  | -3.555755000 | 0.979437000  |
| 1  | -0.664717000 | -3.684110000 | 1.082914000  |
| 1  | 0.798997000  | -4.517592000 | 0.608109000  |
| 6  | 0.016054000  | -3.150398000 | -1.948546000 |
| 1  | 0.324608000  | -4.202712000 | -1.940123000 |
| 1  | 0.485329000  | -2.690010000 | -2.825523000 |
| 6  | 3.305996000  | -3.401342000 | -0.816535000 |
| 1  | 4.378646000  | -3.259099000 | -0.967176000 |
| 1  | 3.187900000  | -4.066344000 | 0.043154000  |
| 1  | 2.924791000  | -3.934169000 | -1.692039000 |
| 6  | 1.048538000  | -3.200948000 | 2.308866000  |
| 1  | 2.138339000  | -3.143790000 | 2.231017000  |
| 1  | 0.700539000  | -2.219661000 | 2.649301000  |
| 1  | 0.813512000  | -3.926803000 | 3.091081000  |
| 6  | -1.496603000 | -3.047191000 | -2.050402000 |
| 1  | -1.815701000 | -1.999411000 | -2.018213000 |
| 1  | -1.886547000 | -3.478744000 | -2.975397000 |
| 1  | -1.985605000 | -3.571730000 | -1.222833000 |

**1GeTS<sup>Si-H</sup>** (T.E.= -3825.448766)

|    |              |              |              |
|----|--------------|--------------|--------------|
| 6  | 0.361603000  | -2.717985000 | -0.192111000 |
| 6  | 1.710070000  | -2.174046000 | -0.626452000 |
| 6  | 1.875563000  | -0.698460000 | -0.176792000 |
| 1  | 0.174001000  | -3.698518000 | -0.647949000 |
| 1  | 0.355370000  | -2.873229000 | 0.899361000  |
| 1  | 1.761677000  | -2.251210000 | -1.719000000 |
| 1  | 2.516204000  | -2.800614000 | -0.232804000 |
| 32 | 0.058910000  | -0.009588000 | -0.681628000 |
| 7  | -0.639536000 | -1.772215000 | -0.631493000 |
| 14 | 2.271702000  | -0.617940000 | 1.676884000  |
| 14 | 3.111949000  | 0.200820000  | -1.280750000 |
| 6  | 2.769372000  | -0.207658000 | -3.081263000 |
| 1  | 1.719583000  | -0.057238000 | -3.349163000 |
| 1  | 3.368214000  | 0.454779000  | -3.712446000 |
| 1  | 3.039088000  | -1.235085000 | -3.334233000 |
| 6  | 2.961642000  | 2.064338000  | -1.123098000 |
| 1  | 3.199377000  | 2.437602000  | -0.126453000 |
| 1  | 3.649213000  | 2.539010000  | -1.828607000 |
| 1  | 1.950933000  | 2.397325000  | -1.381148000 |
| 6  | 4.875493000  | -0.328149000 | -0.926060000 |
| 1  | 4.972820000  | -1.415826000 | -0.987475000 |
| 1  | 5.549858000  | 0.106505000  | -1.668739000 |
| 1  | 5.220781000  | -0.013710000 | 0.060953000  |
| 6  | 3.044185000  | 1.013006000  | 2.188853000  |
| 1  | 2.403777000  | 1.867873000  | 1.961444000  |
| 1  | 3.179631000  | 0.985973000  | 3.274362000  |
| 1  | 4.023933000  | 1.187980000  | 1.738852000  |
| 6  | 0.836404000  | -0.868726000 | 2.872007000  |
| 1  | 0.094118000  | -1.600057000 | 2.546540000  |
| 1  | 1.254083000  | -1.212553000 | 3.824353000  |
| 1  | 0.305504000  | 0.067237000  | 3.063058000  |
| 6  | 3.516338000  | -1.970982000 | 2.073157000  |
| 1  | 3.061361000  | -2.964239000 | 2.044920000  |
| 1  | 4.369442000  | -1.968733000 | 1.390987000  |
| 1  | 3.895353000  | -1.814950000 | 3.087027000  |
| 6  | -1.981845000 | -2.033660000 | -0.415526000 |
| 6  | -2.951635000 | -1.330421000 | -1.142359000 |
| 6  | -2.427829000 | -2.974256000 | 0.518650000  |
| 6  | -4.297422000 | -1.516000000 | -0.907167000 |

|    |              |              |              |
|----|--------------|--------------|--------------|
| 1  | -2.625194000 | -0.637799000 | -1.910230000 |
| 6  | -3.783338000 | -3.160111000 | 0.741808000  |
| 1  | -1.711127000 | -3.553577000 | 1.088421000  |
| 6  | -4.729727000 | -2.428200000 | 0.047183000  |
| 1  | -5.019397000 | -0.947635000 | -1.484842000 |
| 1  | -4.099563000 | -3.889989000 | 1.479198000  |
| 1  | -5.786899000 | -2.576980000 | 0.229881000  |
| 1  | -0.380982000 | 0.443524000  | 0.967080000  |
| 14 | -1.291875000 | 1.828715000  | 0.281535000  |
| 6  | -1.858216000 | 2.810554000  | -1.235965000 |
| 1  | -2.534518000 | 3.587977000  | -0.855246000 |
| 1  | -0.961440000 | 3.336744000  | -1.588670000 |
| 6  | -2.757250000 | 1.205386000  | 1.287244000  |
| 1  | -2.867194000 | 0.131063000  | 1.110777000  |
| 1  | -2.445669000 | 1.298491000  | 2.336085000  |
| 6  | -0.184139000 | 2.997377000  | 1.252163000  |
| 1  | 0.063494000  | 2.510247000  | 2.201217000  |
| 1  | 0.763230000  | 3.132898000  | 0.716709000  |
| 6  | -0.850170000 | 4.343596000  | 1.508040000  |
| 1  | -1.818359000 | 4.222037000  | 2.004242000  |
| 1  | -0.237851000 | 4.981992000  | 2.148625000  |
| 1  | -1.028372000 | 4.889593000  | 0.579253000  |
| 6  | -4.080317000 | 1.912333000  | 1.043872000  |
| 1  | -4.011000000 | 2.989364000  | 1.218618000  |
| 1  | -4.416517000 | 1.770536000  | 0.013524000  |
| 1  | -4.866696000 | 1.524181000  | 1.695300000  |
| 6  | -2.507467000 | 2.063795000  | -2.381848000 |
| 1  | -3.419217000 | 1.548302000  | -2.066206000 |
| 1  | -2.776549000 | 2.731899000  | -3.203034000 |
| 1  | -1.825628000 | 1.308406000  | -2.785383000 |

**2GeTS<sup>Si-H</sup>** (T.E.= -3824.258714)

|    |              |              |              |
|----|--------------|--------------|--------------|
| 6  | 1.870778000  | -0.642933000 | 0.187537000  |
| 6  | 1.571878000  | -1.966404000 | 0.844491000  |
| 6  | 0.338880000  | -2.484346000 | 0.766823000  |
| 1  | 2.367978000  | -2.526574000 | 1.323791000  |
| 1  | 0.088962000  | -3.460726000 | 1.169495000  |
| 32 | 0.043520000  | -0.076281000 | -0.398266000 |
| 7  | -0.635358000 | -1.797851000 | 0.071151000  |
| 14 | 2.803231000  | -0.940644000 | -1.438064000 |



|    |              |              |              |
|----|--------------|--------------|--------------|
| 14 | 2.746452000  | 0.458866000  | 1.450556000  |
| 6  | 2.950732000  | 0.629293000  | -2.454208000 |
| 1  | 3.307374000  | 0.369835000  | -3.454988000 |
| 1  | 1.983535000  | 1.126739000  | -2.570374000 |
| 1  | 3.652681000  | 1.346479000  | -2.027746000 |
| 6  | 4.135221000  | -0.506602000 | 2.265782000  |
| 1  | 4.824272000  | -0.967145000 | 1.556085000  |
| 1  | 4.711334000  | 0.178815000  | 2.894112000  |
| 1  | 3.739650000  | -1.290548000 | 2.915633000  |
| 6  | 3.502241000  | 1.996399000  | 0.686796000  |
| 1  | 2.812140000  | 2.540596000  | 0.038864000  |
| 1  | 3.809066000  | 2.672545000  | 1.489895000  |
| 1  | 4.393717000  | 1.755876000  | 0.102704000  |
| 6  | 1.620516000  | 0.975130000  | 2.856921000  |
| 1  | 0.908471000  | 1.755282000  | 2.581141000  |
| 1  | 1.050322000  | 0.123766000  | 3.237195000  |
| 1  | 2.240887000  | 1.358972000  | 3.672527000  |
| 6  | 4.521359000  | -1.625165000 | -1.137142000 |
| 1  | 4.967683000  | -1.908224000 | -2.094269000 |
| 1  | 5.180866000  | -0.891744000 | -0.667785000 |
| 1  | 4.497405000  | -2.516254000 | -0.505190000 |
| 6  | 1.874010000  | -2.183807000 | -2.490113000 |
| 1  | 2.453458000  | -2.373589000 | -3.398255000 |
| 1  | 1.733749000  | -3.136096000 | -1.975691000 |
| 1  | 0.891448000  | -1.817406000 | -2.800325000 |
| 6  | -1.982224000 | -2.121016000 | 0.111116000  |
| 6  | -2.815841000 | -1.687425000 | -0.924482000 |
| 6  | -2.557739000 | -2.843181000 | 1.160103000  |
| 6  | -4.172663000 | -1.939276000 | -0.899513000 |
| 1  | -2.369433000 | -1.164930000 | -1.764958000 |
| 6  | -3.916742000 | -3.105201000 | 1.167903000  |
| 1  | -1.942404000 | -3.173030000 | 1.989034000  |
| 6  | -4.737690000 | -2.650021000 | 0.149172000  |
| 1  | -4.793644000 | -1.587727000 | -1.716424000 |
| 1  | -4.341758000 | -3.660717000 | 1.996645000  |
| 1  | -5.801710000 | -2.851305000 | 0.168473000  |
| 1  | -0.482940000 | 0.641322000  | 1.089623000  |
| 14 | -1.365115000 | 1.902774000  | -0.073552000 |
| 6  | -0.039322000 | 3.232552000  | -0.052769000 |
| 1  | 0.524037000  | 3.161220000  | 0.883083000  |

|   |              |              |              |
|---|--------------|--------------|--------------|
| 1 | 0.670400000  | 3.038637000  | -0.864034000 |
| 6 | -2.391680000 | 1.997582000  | -1.657212000 |
| 1 | -1.681228000 | 2.279369000  | -2.444940000 |
| 1 | -2.732951000 | 0.991994000  | -1.915713000 |
| 6 | -2.512070000 | 2.075298000  | 1.403951000  |
| 1 | -3.115979000 | 2.975652000  | 1.235024000  |
| 1 | -1.884806000 | 2.283385000  | 2.278318000  |
| 6 | -3.581649000 | 2.946239000  | -1.611134000 |
| 1 | -4.072492000 | 3.016748000  | -2.584881000 |
| 1 | -4.333189000 | 2.603087000  | -0.896124000 |
| 1 | -3.297321000 | 3.959953000  | -1.318057000 |
| 6 | -0.632448000 | 4.629048000  | -0.203955000 |
| 1 | 0.139159000  | 5.399221000  | -0.142268000 |
| 1 | -1.132486000 | 4.748147000  | -1.168349000 |
| 1 | -1.368338000 | 4.843492000  | 0.575844000  |
| 6 | -3.410788000 | 0.877234000  | 1.665579000  |
| 1 | -2.821254000 | -0.019147000 | 1.879460000  |
| 1 | -4.072612000 | 1.044049000  | 2.517905000  |
| 1 | -4.041691000 | 0.641620000  | 0.802924000  |

**3GeTS<sup>Si-H</sup>** (T.E.= -3945.552301)

|    |              |              |              |
|----|--------------|--------------|--------------|
| 6  | -1.764211000 | -1.279025000 | -1.099511000 |
| 6  | -1.916118000 | -0.105021000 | -0.092762000 |
| 1  | -2.653909000 | -1.923490000 | -1.073579000 |
| 1  | -1.724978000 | -0.892344000 | -2.130738000 |
| 7  | 0.567052000  | -1.405921000 | -0.125050000 |
| 5  | -0.431835000 | -2.118612000 | -0.860130000 |
| 7  | -0.315488000 | -3.454829000 | -1.329673000 |
| 6  | -1.259559000 | -4.036507000 | -2.251729000 |
| 1  | -0.739433000 | -4.472803000 | -3.114066000 |
| 1  | -1.838633000 | -4.843853000 | -1.782509000 |
| 1  | -1.957013000 | -3.291900000 | -2.631610000 |
| 6  | 0.685319000  | -4.412822000 | -0.925519000 |
| 1  | 1.401433000  | -4.631483000 | -1.729423000 |
| 1  | 1.245434000  | -4.067221000 | -0.059018000 |
| 1  | 0.202383000  | -5.359241000 | -0.652757000 |
| 14 | -2.733320000 | -0.731802000 | 1.496832000  |
| 14 | -2.820123000 | 1.315129000  | -0.928033000 |
| 6  | -1.901184000 | -2.307806000 | 2.092916000  |
| 1  | -0.840147000 | -2.171110000 | 2.316296000  |

|    |              |              |              |
|----|--------------|--------------|--------------|
| 1  | -2.398598000 | -2.634026000 | 3.010931000  |
| 1  | -1.985432000 | -3.118941000 | 1.364962000  |
| 6  | -4.546417000 | -1.155424000 | 1.258049000  |
| 1  | -4.878647000 | -1.751532000 | 2.112659000  |
| 1  | -5.172322000 | -0.261682000 | 1.216834000  |
| 1  | -4.729474000 | -1.739632000 | 0.353536000  |
| 6  | -4.515036000 | 0.780862000  | -1.538457000 |
| 1  | -4.905366000 | 1.553799000  | -2.206811000 |
| 1  | -4.448011000 | -0.146217000 | -2.114143000 |
| 1  | -5.240829000 | 0.632106000  | -0.739031000 |
| 6  | -3.050532000 | 2.772324000  | 0.234943000  |
| 1  | -3.264433000 | 3.683164000  | -0.330467000 |
| 1  | -3.893916000 | 2.595478000  | 0.907658000  |
| 1  | -2.169686000 | 2.960597000  | 0.853080000  |
| 6  | -2.626769000 | 0.510947000  | 2.898115000  |
| 1  | -3.175095000 | 1.430201000  | 2.684995000  |
| 1  | -3.064178000 | 0.063474000  | 3.795399000  |
| 1  | -1.594747000 | 0.782552000  | 3.134451000  |
| 6  | -1.961374000 | 1.875964000  | -2.507960000 |
| 1  | -0.880914000 | 2.003038000  | -2.427496000 |
| 1  | -2.151619000 | 1.162932000  | -3.314366000 |
| 1  | -2.397153000 | 2.832264000  | -2.813696000 |
| 32 | -0.039720000 | 0.287083000  | 0.481023000  |
| 6  | 1.918615000  | -1.745007000 | 0.041983000  |
| 6  | 2.773071000  | -1.825490000 | -1.056610000 |
| 6  | 2.440005000  | -2.002834000 | 1.307940000  |
| 6  | 4.105411000  | -2.162154000 | -0.892435000 |
| 1  | 2.366364000  | -1.626620000 | -2.043789000 |
| 6  | 3.772343000  | -2.338039000 | 1.471402000  |
| 1  | 1.774295000  | -1.950085000 | 2.164456000  |
| 6  | 4.612596000  | -2.418319000 | 0.372306000  |
| 1  | 4.753673000  | -2.222970000 | -1.759402000 |
| 1  | 4.156883000  | -2.539678000 | 2.464929000  |
| 1  | 5.656064000  | -2.681000000 | 0.499602000  |
| 1  | 0.438350000  | 1.126062000  | -1.005212000 |
| 14 | 1.484433000  | 2.207710000  | -0.019091000 |
| 6  | 0.405030000  | 3.731758000  | -0.241614000 |
| 1  | -0.373923000 | 3.548272000  | -0.985523000 |
| 1  | -0.110279000 | 3.921240000  | 0.706225000  |
| 6  | 2.425615000  | 2.464271000  | 1.596182000  |

|   |             |             |              |
|---|-------------|-------------|--------------|
| 1 | 3.044427000 | 3.357961000 | 1.432784000  |
| 1 | 1.684440000 | 2.732666000 | 2.356984000  |
| 6 | 2.741739000 | 1.933667000 | -1.394994000 |
| 1 | 2.217997000 | 2.151644000 | -2.334343000 |
| 1 | 2.956295000 | 0.859054000 | -1.425118000 |
| 6 | 1.224382000 | 4.954744000 | -0.640761000 |
| 1 | 0.594489000 | 5.841237000 | -0.741217000 |
| 1 | 1.994796000 | 5.189361000 | 0.098161000  |
| 1 | 1.727469000 | 4.802595000 | -1.599386000 |
| 6 | 3.283675000 | 1.307161000 | 2.063725000  |
| 1 | 3.979315000 | 0.976029000 | 1.286055000  |
| 1 | 3.875545000 | 1.561246000 | 2.946266000  |
| 1 | 2.665263000 | 0.444078000 | 2.320003000  |
| 6 | 4.037770000 | 2.724886000 | -1.296428000 |
| 1 | 4.679377000 | 2.547686000 | -2.162747000 |
| 1 | 3.859265000 | 3.801768000 | -1.240330000 |
| 1 | 4.612963000 | 2.446986000 | -0.409921000 |

**4GeTS<sup>Si-H</sup>** (T.E.= -4155.466081)

|    |              |              |              |
|----|--------------|--------------|--------------|
| 6  | 1.849365000  | -1.692538000 | 0.980093000  |
| 6  | 1.930370000  | -0.434934000 | 0.062749000  |
| 1  | 2.316538000  | -2.563552000 | 0.501435000  |
| 1  | 2.418464000  | -1.550636000 | 1.907622000  |
| 7  | -0.828327000 | -1.397878000 | 0.213201000  |
| 14 | 2.719626000  | -0.938791000 | -1.579212000 |
| 14 | 2.800783000  | 0.972899000  | 0.951237000  |
| 6  | 1.588050000  | -2.142106000 | -2.475871000 |
| 1  | 0.666738000  | -1.664100000 | -2.819830000 |
| 1  | 2.102959000  | -2.531076000 | -3.358761000 |
| 1  | 1.307784000  | -2.994760000 | -1.852409000 |
| 6  | 4.362816000  | -1.813280000 | -1.344229000 |
| 1  | 4.682111000  | -2.211113000 | -2.311804000 |
| 1  | 5.144734000  | -1.141629000 | -0.987587000 |
| 1  | 4.299675000  | -2.654486000 | -0.650648000 |
| 6  | 4.634475000  | 0.619460000  | 1.149377000  |
| 1  | 5.171309000  | 0.726357000  | 0.203768000  |
| 1  | 5.069729000  | 1.328366000  | 1.859061000  |
| 1  | 4.815501000  | -0.388789000 | 1.531335000  |
| 6  | 2.645532000  | 2.599506000  | 0.017011000  |
| 1  | 2.728590000  | 3.437990000  | 0.713702000  |

|    |              |              |              |
|----|--------------|--------------|--------------|
| 1  | 3.446078000  | 2.701280000  | -0.718289000 |
| 1  | 1.700168000  | 2.712730000  | -0.519910000 |
| 6  | 3.006109000  | 0.528468000  | -2.710254000 |
| 1  | 3.785561000  | 1.190884000  | -2.326150000 |
| 1  | 3.330388000  | 0.167969000  | -3.690219000 |
| 1  | 2.098486000  | 1.120256000  | -2.857521000 |
| 6  | 2.137940000  | 1.192680000  | 2.695008000  |
| 1  | 1.057929000  | 1.354944000  | 2.728479000  |
| 1  | 2.370059000  | 0.329069000  | 3.323715000  |
| 1  | 2.625118000  | 2.063347000  | 3.144045000  |
| 14 | 0.093505000  | -2.224622000 | 1.428040000  |
| 6  | -0.287954000 | -1.716738000 | 3.189577000  |
| 1  | -0.199891000 | -0.636773000 | 3.328111000  |
| 1  | -1.290439000 | -2.018559000 | 3.501815000  |
| 1  | 0.427599000  | -2.195160000 | 3.865140000  |
| 6  | -0.098124000 | -4.076612000 | 1.278709000  |
| 1  | 0.032684000  | -4.396906000 | 0.242320000  |
| 1  | 0.658368000  | -4.579342000 | 1.886993000  |
| 1  | -1.077738000 | -4.420407000 | 1.616079000  |
| 32 | 0.071651000  | 0.115140000  | -0.478687000 |
| 6  | -2.111361000 | -1.727693000 | -0.218908000 |
| 6  | -2.509212000 | -1.523733000 | -1.545850000 |
| 6  | -3.058619000 | -2.264481000 | 0.658877000  |
| 6  | -3.795288000 | -1.812065000 | -1.960400000 |
| 1  | -1.791792000 | -1.123085000 | -2.255613000 |
| 6  | -4.341636000 | -2.563938000 | 0.235984000  |
| 1  | -2.788903000 | -2.419704000 | 1.698706000  |
| 6  | -4.725969000 | -2.331798000 | -1.073870000 |
| 1  | -4.070878000 | -1.635206000 | -2.994334000 |
| 1  | -5.051844000 | -2.972096000 | 0.946671000  |
| 1  | -5.733575000 | -2.557230000 | -1.401358000 |
| 1  | -0.260597000 | 1.116134000  | 0.944403000  |
| 14 | -1.294951000 | 2.163340000  | -0.145098000 |
| 6  | -1.613531000 | 2.657586000  | -1.942140000 |
| 1  | -0.633374000 | 2.776854000  | -2.419497000 |
| 1  | -2.072870000 | 1.785672000  | -2.422155000 |
| 6  | -2.891201000 | 1.548532000  | 0.621642000  |
| 1  | -3.596856000 | 2.383575000  | 0.521678000  |
| 1  | -3.293817000 | 0.745520000  | -0.006175000 |
| 6  | -0.601890000 | 3.685314000  | 0.742655000  |

|   |              |             |              |
|---|--------------|-------------|--------------|
| 1 | 0.063651000  | 3.378151000 | 1.553815000  |
| 1 | 0.022464000  | 4.238644000 | 0.032000000  |
| 6 | -2.463962000 | 3.903218000 | -2.141735000 |
| 1 | -2.645679000 | 4.101782000 | -3.201006000 |
| 1 | -3.441333000 | 3.808875000 | -1.659849000 |
| 1 | -1.979904000 | 4.790835000 | -1.726695000 |
| 6 | -2.793200000 | 1.098864000 | 2.068320000  |
| 1 | -2.368089000 | 1.877272000 | 2.709981000  |
| 1 | -3.769452000 | 0.829660000 | 2.478601000  |
| 1 | -2.146538000 | 0.223613000 | 2.158132000  |
| 6 | -1.697889000 | 4.594589000 | 1.290452000  |
| 1 | -1.277171000 | 5.499866000 | 1.734359000  |
| 1 | -2.399072000 | 4.910845000 | 0.514902000  |
| 1 | -2.282116000 | 4.095663000 | 2.067228000  |

**5GeTS<sup>Si-H</sup>** (T.E.= -3899.523532)

|    |              |              |              |
|----|--------------|--------------|--------------|
| 6  | 1.602332000  | -1.369032000 | -1.486766000 |
| 6  | 1.902948000  | -0.427612000 | -0.305770000 |
| 1  | 1.514679000  | -0.808297000 | -2.427529000 |
| 1  | 2.390203000  | -2.110064000 | -1.655905000 |
| 7  | -0.605002000 | -1.512321000 | -0.546838000 |
| 14 | 2.874091000  | 1.099515000  | -0.832415000 |
| 14 | 2.672002000  | -1.406744000 | 1.129523000  |
| 6  | 2.276796000  | 1.730764000  | -2.495894000 |
| 1  | 1.191090000  | 1.821834000  | -2.564225000 |
| 1  | 2.709148000  | 2.720943000  | -2.667103000 |
| 1  | 2.613961000  | 1.084455000  | -3.309947000 |
| 6  | 4.695650000  | 0.723091000  | -1.064392000 |
| 1  | 5.192953000  | 1.595681000  | -1.496912000 |
| 1  | 5.205565000  | 0.479085000  | -0.130093000 |
| 1  | 4.833869000  | -0.111649000 | -1.757410000 |
| 6  | 4.106095000  | -2.450557000 | 0.528085000  |
| 1  | 4.866580000  | -1.877441000 | -0.003960000 |
| 1  | 4.583234000  | -2.921997000 | 1.391823000  |
| 1  | 3.762074000  | -3.252793000 | -0.129113000 |
| 6  | 3.244207000  | -0.260294000 | 2.495345000  |
| 1  | 3.547706000  | -0.860168000 | 3.357396000  |
| 1  | 4.098246000  | 0.353636000  | 2.201891000  |
| 1  | 2.442312000  | 0.407710000  | 2.822171000  |
| 6  | 2.713907000  | 2.480227000  | 0.433783000  |

|    |              |              |              |
|----|--------------|--------------|--------------|
| 1  | 3.388517000  | 2.333658000  | 1.278747000  |
| 1  | 2.978015000  | 3.432304000  | -0.035262000 |
| 1  | 1.704585000  | 2.587562000  | 0.841893000  |
| 6  | 1.438913000  | -2.596883000 | 1.892988000  |
| 1  | 0.608887000  | -2.083332000 | 2.386447000  |
| 1  | 1.023381000  | -3.298285000 | 1.165749000  |
| 1  | 1.957685000  | -3.182428000 | 2.657841000  |
| 6  | -1.922447000 | -1.987743000 | -0.384063000 |
| 6  | -2.722610000 | -2.284567000 | -1.482695000 |
| 6  | -2.458306000 | -2.101345000 | 0.893402000  |
| 6  | -4.037198000 | -2.672330000 | -1.299261000 |
| 1  | -2.305806000 | -2.201075000 | -2.478509000 |
| 6  | -3.777970000 | -2.479170000 | 1.071874000  |
| 1  | -1.832999000 | -1.881438000 | 1.752538000  |
| 6  | -4.574051000 | -2.764812000 | -0.024323000 |
| 1  | -4.651434000 | -2.897825000 | -2.163491000 |
| 1  | -4.182207000 | -2.554856000 | 2.074854000  |
| 1  | -5.606885000 | -3.062362000 | 0.112998000  |
| 6  | 0.290995000  | -2.129714000 | -1.373036000 |
| 8  | 0.092113000  | -3.160788000 | -1.982430000 |
| 32 | 0.075168000  | 0.049649000  | 0.316899000  |
| 1  | -0.326089000 | 1.059661000  | -1.054799000 |
| 14 | -1.431871000 | 2.012467000  | 0.103363000  |
| 6  | -1.744804000 | 2.486988000  | 1.900681000  |
| 1  | -2.375974000 | 3.385002000  | 1.872695000  |
| 1  | -0.788774000 | 2.803727000  | 2.333977000  |
| 6  | -2.993927000 | 1.329328000  | -0.670545000 |
| 1  | -3.291621000 | 0.402566000  | -0.169550000 |
| 1  | -2.770341000 | 1.054782000  | -1.706259000 |
| 6  | -0.753172000 | 3.518813000  | -0.799965000 |
| 1  | 0.340697000  | 3.496497000  | -0.753447000 |
| 1  | -0.999803000 | 3.369448000  | -1.858509000 |
| 6  | -2.393438000 | 1.408251000  | 2.743903000  |
| 1  | -2.547765000 | 1.732864000  | 3.775042000  |
| 1  | -3.368641000 | 1.117860000  | 2.341904000  |
| 1  | -1.772504000 | 0.507529000  | 2.773549000  |
| 6  | -4.123682000 | 2.351117000  | -0.611909000 |
| 1  | -3.860450000 | 3.275452000  | -1.133937000 |
| 1  | -5.034210000 | 1.965177000  | -1.074758000 |
| 1  | -4.373835000 | 2.617687000  | 0.418801000  |

|   |              |             |              |
|---|--------------|-------------|--------------|
| 6 | -1.267800000 | 4.863336000 | -0.305412000 |
| 1 | -0.895242000 | 5.683388000 | -0.923076000 |
| 1 | -2.359707000 | 4.915740000 | -0.320859000 |
| 1 | -0.948713000 | 5.059567000 | 0.720539000  |

**8GeTS<sup>Si-H</sup>** (T.E.= -3468.126472)

|    |              |              |              |
|----|--------------|--------------|--------------|
| 6  | 0.987116000  | -2.611754000 | 0.683148000  |
| 6  | -0.490315000 | -2.584896000 | 1.051712000  |
| 6  | -1.218863000 | -1.748941000 | 0.023113000  |
| 1  | 1.581403000  | -2.935904000 | 1.547145000  |
| 1  | 1.150992000  | -3.347970000 | -0.120555000 |
| 1  | -0.585296000 | -2.166740000 | 2.068752000  |
| 1  | -0.857454000 | -3.618006000 | 1.097635000  |
| 32 | -0.091089000 | -0.266412000 | -0.308255000 |
| 7  | 1.400592000  | -1.288871000 | 0.252443000  |
| 15 | -2.886969000 | -1.728474000 | -0.094788000 |
| 6  | -3.589157000 | -3.363836000 | -0.408519000 |
| 1  | -3.284481000 | -4.044785000 | 0.387976000  |
| 1  | -4.679407000 | -3.320841000 | -0.435297000 |
| 1  | -3.209195000 | -3.744589000 | -1.356620000 |
| 6  | -3.456634000 | -0.672849000 | -1.436338000 |
| 1  | -3.211112000 | 0.370058000  | -1.228528000 |
| 1  | -2.971546000 | -0.970137000 | -2.366313000 |
| 1  | -4.538736000 | -0.763847000 | -1.542241000 |
| 6  | -3.831831000 | -1.173224000 | 1.357385000  |
| 1  | -4.910267000 | -1.231328000 | 1.194443000  |
| 1  | -3.566744000 | -1.804434000 | 2.208553000  |
| 1  | -3.552559000 | -0.144824000 | 1.595799000  |
| 6  | 2.717408000  | -1.052624000 | -0.049143000 |
| 6  | 3.712225000  | -2.032634000 | 0.101823000  |
| 6  | 3.134092000  | 0.204559000  | -0.518960000 |
| 6  | 5.036687000  | -1.755418000 | -0.191150000 |
| 1  | 3.449091000  | -3.023173000 | 0.449464000  |
| 6  | 4.455602000  | 0.466600000  | -0.809513000 |
| 1  | 2.392239000  | 0.982833000  | -0.666253000 |
| 6  | 5.429276000  | -0.509362000 | -0.646215000 |
| 1  | 5.775062000  | -2.539736000 | -0.060150000 |
| 1  | 4.729311000  | 1.452787000  | -1.169704000 |
| 1  | 6.467824000  | -0.301088000 | -0.872223000 |
| 1  | -0.227399000 | 0.612581000  | 1.273596000  |



|    |              |             |              |
|----|--------------|-------------|--------------|
| 14 | -0.248977000 | 2.093776000 | 0.183587000  |
| 6  | 1.149698000  | 2.862571000 | 1.181943000  |
| 1  | 2.049301000  | 2.870374000 | 0.556809000  |
| 1  | 0.858154000  | 3.918554000 | 1.272621000  |
| 6  | -1.967456000 | 2.457482000 | 0.880351000  |
| 1  | -2.698922000 | 1.793233000 | 0.404188000  |
| 1  | -1.956484000 | 2.173017000 | 1.937531000  |
| 6  | -0.142358000 | 2.971965000 | -1.496850000 |
| 1  | -0.206071000 | 4.051343000 | -1.302168000 |
| 1  | 0.864078000  | 2.795229000 | -1.893253000 |
| 6  | 1.449119000  | 2.269479000 | 2.544075000  |
| 1  | 1.818324000  | 1.245065000 | 2.453421000  |
| 1  | 2.204589000  | 2.847594000 | 3.082012000  |
| 1  | 0.554446000  | 2.230984000 | 3.171677000  |
| 6  | -2.393885000 | 3.909001000 | 0.719589000  |
| 1  | -1.654850000 | 4.593574000 | 1.145871000  |
| 1  | -2.516255000 | 4.183139000 | -0.330793000 |
| 1  | -3.344397000 | 4.110295000 | 1.219501000  |
| 6  | -1.187912000 | 2.545227000 | -2.507515000 |
| 1  | -2.202926000 | 2.739928000 | -2.145356000 |
| 1  | -1.082094000 | 3.061612000 | -3.464588000 |
| 1  | -1.115262000 | 1.470957000 | -2.709788000 |

**9GeTS<sup>Si-H</sup> (T.E.= -3466.940590)**

|    |              |              |              |
|----|--------------|--------------|--------------|
| 6  | 0.234271000  | -2.911282000 | -0.130406000 |
| 6  | 1.552630000  | -2.639011000 | -0.204698000 |
| 6  | 1.999183000  | -1.336602000 | 0.257171000  |
| 7  | -0.590921000 | -1.916039000 | 0.394032000  |
| 15 | 3.481505000  | -0.640361000 | -0.119669000 |
| 6  | 4.858348000  | -1.788086000 | 0.065487000  |
| 1  | 4.718577000  | -2.634227000 | -0.608955000 |
| 1  | 5.801007000  | -1.295798000 | -0.179165000 |
| 1  | 4.888068000  | -2.156125000 | 1.090962000  |
| 6  | 3.828052000  | 0.771507000  | 0.939505000  |
| 1  | 4.770298000  | 1.237853000  | 0.647873000  |
| 1  | 3.026047000  | 1.506268000  | 0.842876000  |
| 1  | 3.880763000  | 0.447149000  | 1.978609000  |
| 6  | 3.674920000  | 0.005870000  | -1.804041000 |
| 1  | 2.924542000  | 0.782883000  | -1.969819000 |
| 1  | 4.671519000  | 0.419198000  | -1.973760000 |

|    |              |              |              |
|----|--------------|--------------|--------------|
| 1  | 3.489125000  | -0.801915000 | -2.514414000 |
| 32 | 0.412683000  | -0.322674000 | 0.536500000  |
| 6  | -1.967620000 | -1.914831000 | 0.250966000  |
| 6  | -2.747127000 | -1.117657000 | 1.098936000  |
| 6  | -2.622230000 | -2.651848000 | -0.740524000 |
| 6  | -4.115820000 | -1.041926000 | 0.945398000  |
| 1  | -2.251555000 | -0.560196000 | 1.888779000  |
| 6  | -3.998408000 | -2.578983000 | -0.877207000 |
| 1  | -2.041167000 | -3.256767000 | -1.426639000 |
| 6  | -4.757303000 | -1.771544000 | -0.046913000 |
| 1  | -4.691713000 | -0.411998000 | 1.614925000  |
| 1  | -4.481598000 | -3.154112000 | -1.659730000 |
| 1  | -5.832634000 | -1.715445000 | -0.163924000 |
| 1  | -0.194398000 | -3.887416000 | -0.324489000 |
| 1  | 2.254148000  | -3.413548000 | -0.500183000 |
| 1  | 0.025278000  | 0.202794000  | -1.195441000 |
| 14 | -0.615836000 | 1.709912000  | -0.227808000 |
| 6  | -2.157910000 | 1.499271000  | -1.293730000 |
| 1  | -1.819400000 | 1.665249000  | -2.324352000 |
| 1  | -2.447829000 | 0.445582000  | -1.254985000 |
| 6  | 0.700691000  | 2.772411000  | -1.065308000 |
| 1  | 1.632758000  | 2.777055000  | -0.489296000 |
| 1  | 0.932606000  | 2.306917000  | -2.028264000 |
| 6  | -1.116047000 | 2.625329000  | 1.359964000  |
| 1  | -1.600931000 | 3.564696000  | 1.066143000  |
| 1  | -1.889658000 | 2.029678000  | 1.858672000  |
| 6  | -3.348774000 | 2.383573000  | -0.960716000 |
| 1  | -4.176776000 | 2.211359000  | -1.652877000 |
| 1  | -3.724968000 | 2.181639000  | 0.045025000  |
| 1  | -3.100177000 | 3.447595000  | -1.006988000 |
| 6  | 0.203714000  | 4.197709000  | -1.272431000 |
| 1  | -0.743347000 | 4.209633000  | -1.820908000 |
| 1  | 0.031592000  | 4.710272000  | -0.322582000 |
| 1  | 0.914845000  | 4.799806000  | -1.842739000 |
| 6  | 0.034874000  | 2.895305000  | 2.309077000  |
| 1  | -0.290769000 | 3.379474000  | 3.232958000  |
| 1  | 0.536230000  | 1.962989000  | 2.592622000  |
| 1  | 0.791420000  | 3.543158000  | 1.855033000  |

**14GeTS<sup>Si-H</sup> (T.E.= -3662.295465)**

|    |              |              |              |
|----|--------------|--------------|--------------|
| 6  | -2.508104000 | 1.033080000  | -0.219454000 |
| 6  | -2.069345000 | -0.314032000 | -0.029053000 |
| 7  | -0.070439000 | 1.485752000  | 0.325083000  |
| 6  | 1.229759000  | 1.991561000  | 0.229705000  |
| 6  | 1.650296000  | 2.692269000  | -0.902976000 |
| 6  | 2.955530000  | 3.134696000  | -1.016596000 |
| 6  | 3.879289000  | 2.873988000  | -0.015268000 |
| 6  | 3.474913000  | 2.175992000  | 1.111005000  |
| 6  | 2.165193000  | 1.744967000  | 1.235244000  |
| 1  | 0.934576000  | 2.872027000  | -1.698877000 |
| 1  | 3.258814000  | 3.676838000  | -1.905386000 |
| 1  | 4.903589000  | 3.213365000  | -0.112166000 |
| 1  | 4.182870000  | 1.970238000  | 1.906536000  |
| 1  | 1.843336000  | 1.214864000  | 2.126532000  |
| 5  | -1.320233000 | 2.115454000  | 0.003622000  |
| 7  | -1.540613000 | 3.511137000  | -0.012659000 |
| 6  | -2.720905000 | 4.128776000  | -0.576845000 |
| 1  | -3.233803000 | 4.743317000  | 0.173789000  |
| 1  | -2.444104000 | 4.794307000  | -1.405364000 |
| 1  | -3.412506000 | 3.368768000  | -0.932656000 |
| 6  | -0.616507000 | 4.493549000  | 0.498265000  |
| 1  | -0.114881000 | 5.050123000  | -0.305529000 |
| 1  | -1.158102000 | 5.223314000  | 1.111386000  |
| 1  | 0.151096000  | 4.037797000  | 1.120943000  |
| 15 | -3.266043000 | -1.527388000 | -0.057582000 |
| 6  | -4.122803000 | -1.668176000 | -1.634143000 |
| 1  | -4.889948000 | -2.443589000 | -1.588716000 |
| 1  | -4.578075000 | -0.703186000 | -1.855380000 |
| 1  | -3.399070000 | -1.910518000 | -2.412976000 |
| 6  | -4.560563000 | -1.324419000 | 1.177958000  |
| 1  | -5.327049000 | -2.093478000 | 1.064472000  |
| 1  | -4.117241000 | -1.392372000 | 2.172002000  |
| 1  | -5.001726000 | -0.336548000 | 1.047372000  |
| 6  | -2.536772000 | -3.141797000 | 0.248771000  |
| 1  | -1.851932000 | -3.390411000 | -0.563769000 |
| 1  | -1.982996000 | -3.129257000 | 1.189770000  |
| 1  | -3.317645000 | -3.902076000 | 0.301391000  |
| 8  | -3.701543000 | 1.306947000  | -0.462819000 |
| 32 | -0.225517000 | -0.399506000 | 0.456687000  |

|    |             |              |              |
|----|-------------|--------------|--------------|
| 1  | 0.526678000 | -0.672280000 | -1.170928000 |
| 14 | 1.744566000 | -1.660592000 | -0.259805000 |
| 6  | 2.609580000 | -2.097707000 | 1.372572000  |
| 1  | 2.945600000 | -1.163946000 | 1.836826000  |
| 1  | 3.522615000 | -2.644952000 | 1.103709000  |
| 6  | 1.091111000 | -3.275080000 | -0.975751000 |
| 1  | 0.536006000 | -3.054252000 | -1.892943000 |
| 1  | 0.379287000 | -3.724435000 | -0.275547000 |
| 6  | 3.013135000 | -0.808079000 | -1.363363000 |
| 1  | 2.747531000 | -1.087439000 | -2.390817000 |
| 1  | 2.828208000 | 0.269281000  | -1.301923000 |
| 6  | 4.478343000 | -1.098083000 | -1.077366000 |
| 1  | 5.128982000 | -0.604346000 | -1.803587000 |
| 1  | 4.767669000 | -0.731984000 | -0.089366000 |
| 1  | 4.706956000 | -2.167099000 | -1.108785000 |
| 6  | 2.225797000 | -4.252434000 | -1.256663000 |
| 1  | 2.769704000 | -4.508507000 | -0.342993000 |
| 1  | 1.861819000 | -5.187115000 | -1.689308000 |
| 1  | 2.950745000 | -3.830640000 | -1.958306000 |
| 6  | 1.767500000 | -2.907794000 | 2.335715000  |
| 1  | 1.536324000 | -3.897387000 | 1.930542000  |
| 1  | 2.264668000 | -3.060047000 | 3.296586000  |
| 1  | 0.813882000 | -2.406441000 | 2.537507000  |

**IX-TS<sup>Si-H</sup> (T.E.= -2608.061304)**

|    |              |              |              |
|----|--------------|--------------|--------------|
| 6  | -0.303714000 | -2.356176000 | 0.823910000  |
| 6  | 1.106188000  | -2.281451000 | 0.251090000  |
| 6  | 1.608275000  | -0.806034000 | 0.163529000  |
| 6  | -1.241844000 | -1.307587000 | 0.160503000  |
| 1  | -0.691781000 | -3.378086000 | 0.710540000  |
| 1  | -0.246896000 | -2.183396000 | 1.904232000  |
| 1  | 1.094667000  | -2.738870000 | -0.746673000 |
| 1  | 1.792849000  | -2.903364000 | 0.841289000  |
| 14 | -0.009254000 | 0.007299000  | -0.562171000 |
| 14 | -2.120259000 | -2.071322000 | -1.337156000 |
| 14 | -2.479071000 | -0.766441000 | 1.485078000  |
| 14 | 2.945066000  | -0.776416000 | -1.196782000 |
| 14 | 2.386639000  | -0.338488000 | 1.832138000  |
| 6  | 4.034276000  | -2.306690000 | -1.104524000 |
| 6  | 4.046490000  | 0.748064000  | -1.178567000 |

|    |              |              |              |
|----|--------------|--------------|--------------|
| 6  | 2.258310000  | -0.856623000 | -2.945156000 |
| 6  | 2.427641000  | 1.496762000  | 2.219548000  |
| 6  | 1.590408000  | -1.153732000 | 3.326375000  |
| 6  | 4.164613000  | -0.946367000 | 1.993338000  |
| 6  | -0.935604000 | -3.001078000 | -2.459744000 |
| 1  | -0.399622000 | -3.804924000 | -1.950520000 |
| 6  | -3.423933000 | -3.340348000 | -0.861321000 |
| 6  | -2.964477000 | -0.809722000 | -2.437823000 |
| 6  | -1.725180000 | 0.162589000  | 2.941887000  |
| 6  | -3.290198000 | -2.245641000 | 2.318539000  |
| 6  | -3.861642000 | 0.336645000  | 0.867287000  |
| 1  | -0.328055000 | 1.232569000  | 0.693970000  |
| 14 | -0.427550000 | 2.538066000  | -0.267216000 |
| 6  | -1.543284000 | 2.910382000  | -1.739998000 |
| 6  | 1.330245000  | 3.071928000  | -0.668988000 |
| 6  | -1.067247000 | 3.574136000  | 1.181793000  |
| 6  | -1.251169000 | 5.046016000  | 0.837858000  |
| 6  | 1.609324000  | 3.351447000  | -2.136831000 |
| 6  | -3.050875000 | 2.832271000  | -1.604892000 |

Cartesian coordinates of the H – H splitting product obtained for CAASis (**1Si-5Si**, **8Si-9Si** and **14Si**) and CAAGes (**1Ge-5Ge**, **8Ge-9Ge** and **14Ge**), along with their total energies (in hartrees) including zero point vibrational correction.

**1SiP<sup>H-H</sup>** (T.E.= -1511.739046)

|    |              |              |              |
|----|--------------|--------------|--------------|
| 6  | 0.972163000  | 0.199795000  | -1.605659000 |
| 6  | -0.519615000 | -0.115168000 | -1.606067000 |
| 6  | -1.139966000 | -0.057227000 | -0.174018000 |
| 1  | 1.454008000  | -0.286803000 | -2.461711000 |
| 1  | 1.148988000  | 1.279043000  | -1.718442000 |
| 1  | -0.646373000 | -1.119142000 | -2.027638000 |
| 1  | -1.037958000 | 0.560301000  | -2.295789000 |
| 7  | 1.542268000  | -0.286242000 | -0.360482000 |
| 14 | 0.339575000  | -0.442930000 | 0.891617000  |
| 14 | -1.759363000 | 1.681084000  | 0.239839000  |
| 14 | -2.455038000 | -1.412636000 | -0.076205000 |
| 6  | -3.368425000 | -1.382910000 | 1.556762000  |
| 1  | -4.042660000 | -0.527984000 | 1.638956000  |
| 1  | -3.969205000 | -2.290642000 | 1.655907000  |

|   |              |              |              |
|---|--------------|--------------|--------------|
| 1 | -2.673919000 | -1.350921000 | 2.401724000  |
| 6 | -1.653670000 | -3.103194000 | -0.240931000 |
| 1 | -1.162408000 | -3.404622000 | 0.686035000  |
| 1 | -2.426351000 | -3.843710000 | -0.464564000 |
| 1 | -0.911018000 | -3.151448000 | -1.040899000 |
| 6 | -3.682260000 | -1.245827000 | -1.482692000 |
| 1 | -4.327073000 | -2.128537000 | -1.502160000 |
| 1 | -4.320622000 | -0.368213000 | -1.376710000 |
| 1 | -3.182993000 | -1.182978000 | -2.452591000 |
| 6 | -2.217116000 | 1.870628000  | 2.047561000  |
| 1 | -2.435108000 | 2.925678000  | 2.236895000  |
| 1 | -3.105442000 | 1.297854000  | 2.316791000  |
| 1 | -1.407989000 | 1.577395000  | 2.719621000  |
| 6 | -0.435345000 | 2.956571000  | -0.137658000 |
| 1 | 0.495288000  | 2.774751000  | 0.406421000  |
| 1 | -0.202229000 | 3.009788000  | -1.203651000 |
| 1 | -0.805908000 | 3.940177000  | 0.165048000  |
| 6 | -3.272015000 | 2.135780000  | -0.770962000 |
| 1 | -4.164126000 | 1.617450000  | -0.411169000 |
| 1 | -3.453631000 | 3.209620000  | -0.672960000 |
| 1 | -3.156049000 | 1.913417000  | -1.834319000 |
| 6 | 2.910701000  | -0.217820000 | -0.156647000 |
| 6 | 3.785059000  | 0.307197000  | -1.112764000 |
| 6 | 3.459500000  | -0.681271000 | 1.046055000  |
| 6 | 5.146664000  | 0.364369000  | -0.866515000 |
| 1 | 3.402589000  | 0.680492000  | -2.054069000 |
| 6 | 4.817055000  | -0.617033000 | 1.280344000  |
| 1 | 2.807442000  | -1.110633000 | 1.801312000  |
| 6 | 5.676985000  | -0.092099000 | 0.326466000  |
| 1 | 5.800467000  | 0.779024000  | -1.626000000 |
| 1 | 5.209487000  | -0.985858000 | 2.221496000  |
| 1 | 6.742891000  | -0.043071000 | 0.512218000  |
| 1 | 0.595624000  | 0.527321000  | 1.984509000  |
| 1 | 0.347669000  | -1.782042000 | 1.525943000  |

**2SiP<sup>H-H</sup>** (T.E.= -1510.546303)

|   |              |              |              |
|---|--------------|--------------|--------------|
| 6 | -1.165348000 | -0.095927000 | -0.174767000 |
| 6 | -0.513939000 | -0.143048000 | -1.541089000 |
| 6 | 0.805352000  | -0.348222000 | -1.588401000 |
| 1 | -1.097208000 | -0.011543000 | -2.446448000 |

|    |              |              |              |
|----|--------------|--------------|--------------|
| 1  | 1.385483000  | -0.391954000 | -2.502502000 |
| 14 | 0.221738000  | -0.797403000 | 0.859477000  |
| 7  | 1.458927000  | -0.570653000 | -0.370403000 |
| 14 | -2.700784000 | -1.181526000 | -0.089840000 |
| 14 | -1.377175000 | 1.742265000  | 0.241416000  |
| 6  | -4.150282000 | -0.420558000 | -0.999976000 |
| 1  | -4.954018000 | -1.156857000 | -1.084035000 |
| 1  | -4.553938000 | 0.454145000  | -0.485164000 |
| 1  | -3.870762000 | -0.117861000 | -2.012604000 |
| 6  | -3.188494000 | -1.489722000 | 1.693087000  |
| 1  | -3.995683000 | -2.226159000 | 1.728577000  |
| 1  | -2.360065000 | -1.888295000 | 2.285033000  |
| 1  | -3.545978000 | -0.582964000 | 2.184207000  |
| 6  | -2.312892000 | -2.818044000 | -0.912457000 |
| 1  | -3.169728000 | -3.491706000 | -0.830011000 |
| 1  | -2.094596000 | -2.677764000 | -1.973783000 |
| 1  | -1.450648000 | -3.312092000 | -0.458221000 |
| 6  | -2.282291000 | 1.974157000  | 1.864746000  |
| 1  | -2.275828000 | 3.033365000  | 2.135098000  |
| 1  | -3.325144000 | 1.654955000  | 1.802231000  |
| 1  | -1.805704000 | 1.421606000  | 2.678947000  |
| 6  | 0.300348000  | 2.569607000  | 0.380603000  |
| 1  | 0.884622000  | 2.206670000  | 1.229429000  |
| 1  | 0.898815000  | 2.433830000  | -0.523652000 |
| 1  | 0.150014000  | 3.643945000  | 0.519524000  |
| 6  | -2.311292000 | 2.623902000  | -1.120020000 |
| 1  | -3.340156000 | 2.275659000  | -1.220971000 |
| 1  | -2.340268000 | 3.693723000  | -0.895909000 |
| 1  | -1.812586000 | 2.503011000  | -2.084426000 |
| 6  | 2.825952000  | -0.399238000 | -0.194329000 |
| 6  | 3.438538000  | -0.906295000 | 0.954363000  |
| 6  | 3.614826000  | 0.290267000  | -1.117077000 |
| 6  | 4.791409000  | -0.732333000 | 1.169043000  |
| 1  | 2.843104000  | -1.456769000 | 1.677093000  |
| 6  | 4.971694000  | 0.446668000  | -0.898315000 |
| 1  | 3.159917000  | 0.727466000  | -1.998092000 |
| 6  | 5.572315000  | -0.059273000 | 0.242237000  |
| 1  | 5.241930000  | -1.136147000 | 2.068742000  |
| 1  | 5.564464000  | 0.986720000  | -1.628204000 |
| 1  | 6.634445000  | 0.071615000  | 0.409079000  |

|   |             |              |             |
|---|-------------|--------------|-------------|
| 1 | 0.555710000 | -0.069400000 | 2.103145000 |
| 1 | 0.073031000 | -2.230978000 | 1.215099000 |

**3SiP<sup>H-H</sup>** (T.E.= -1631.842506)

|    |              |              |              |
|----|--------------|--------------|--------------|
| 6  | -0.708845000 | 0.963146000  | -0.945008000 |
| 6  | -1.409329000 | -0.120875000 | -0.048696000 |
| 1  | -0.835467000 | 0.724329000  | -2.011374000 |
| 1  | -1.196528000 | 1.939175000  | -0.829792000 |
| 14 | 0.018713000  | -1.136474000 | 0.588127000  |
| 7  | 1.332126000  | -0.119158000 | 0.065243000  |
| 5  | 0.852366000  | 1.041234000  | -0.645577000 |
| 7  | 1.639984000  | 2.150406000  | -1.029182000 |
| 6  | 1.142994000  | 3.181536000  | -1.908556000 |
| 1  | 1.074782000  | 4.148569000  | -1.393389000 |
| 1  | 1.815959000  | 3.317113000  | -2.764229000 |
| 1  | 0.158027000  | 2.931324000  | -2.298382000 |
| 6  | 2.982618000  | 2.438455000  | -0.581412000 |
| 1  | 3.039985000  | 3.474590000  | -0.227722000 |
| 1  | 3.280943000  | 1.790665000  | 0.240171000  |
| 1  | 3.718644000  | 2.326070000  | -1.388336000 |
| 14 | -2.562947000 | -1.159318000 | -1.106566000 |
| 14 | -2.194830000 | 0.763740000  | 1.419378000  |
| 6  | -1.576863000 | -2.033315000 | -2.445427000 |
| 1  | -1.010256000 | -2.874196000 | -2.041576000 |
| 1  | -2.259803000 | -2.423614000 | -3.204749000 |
| 1  | -0.870757000 | -1.367664000 | -2.948199000 |
| 6  | -3.842622000 | -0.091015000 | -1.967490000 |
| 1  | -4.351398000 | -0.678825000 | -2.735931000 |
| 1  | -4.599181000 | 0.277401000  | -1.272701000 |
| 1  | -3.388376000 | 0.773820000  | -2.457231000 |
| 6  | -3.597137000 | 1.890113000  | 0.883170000  |
| 1  | -4.499669000 | 1.315934000  | 0.660493000  |
| 1  | -3.838686000 | 2.578002000  | 1.698185000  |
| 1  | -3.353333000 | 2.489448000  | 0.003124000  |
| 6  | -2.889695000 | -0.402409000 | 2.711643000  |
| 1  | -3.169923000 | 0.180686000  | 3.593489000  |
| 1  | -3.785644000 | -0.917573000 | 2.359854000  |
| 1  | -2.167492000 | -1.156548000 | 3.030190000  |
| 6  | -3.448775000 | -2.460487000 | -0.089627000 |
| 1  | -4.251586000 | -2.022187000 | 0.507341000  |



|   |              |              |              |
|---|--------------|--------------|--------------|
| 1 | -3.897094000 | -3.209273000 | -0.747557000 |
| 1 | -2.770365000 | -2.981357000 | 0.592315000  |
| 6 | -0.887817000 | 1.833884000  | 2.242563000  |
| 1 | -0.064208000 | 1.242040000  | 2.651819000  |
| 1 | -0.460443000 | 2.563711000  | 1.549844000  |
| 1 | -1.340548000 | 2.387216000  | 3.069908000  |
| 6 | 2.663886000  | -0.561942000 | 0.209319000  |
| 6 | 3.446620000  | -0.818801000 | -0.912746000 |
| 6 | 3.208858000  | -0.772729000 | 1.472034000  |
| 6 | 4.753422000  | -1.248362000 | -0.772524000 |
| 1 | 3.013480000  | -0.667505000 | -1.896360000 |
| 6 | 4.515284000  | -1.211046000 | 1.608602000  |
| 1 | 2.601224000  | -0.564923000 | 2.347234000  |
| 6 | 5.294988000  | -1.445432000 | 0.488344000  |
| 1 | 5.352487000  | -1.438319000 | -1.655877000 |
| 1 | 4.928298000  | -1.363006000 | 2.599347000  |
| 1 | 6.318384000  | -1.784659000 | 0.596074000  |
| 1 | 0.029365000  | -1.334481000 | 2.060642000  |
| 1 | 0.173956000  | -2.496464000 | 0.010572000  |

**4SiP<sup>H-H</sup>** (T.E.= -1841.751758)

|    |              |              |              |
|----|--------------|--------------|--------------|
| 6  | 0.903885000  | 0.094820000  | 1.509902000  |
| 6  | 1.383289000  | 0.004399000  | 0.013101000  |
| 1  | 1.231406000  | -0.781015000 | 2.083557000  |
| 1  | 1.360027000  | 0.946614000  | 2.027890000  |
| 14 | -0.122349000 | 0.056448000  | -1.108852000 |
| 7  | -1.427752000 | 0.005053000  | 0.015182000  |
| 14 | 2.209487000  | -1.675162000 | -0.218671000 |
| 14 | 2.459726000  | 1.502103000  | -0.374482000 |
| 6  | 0.950675000  | -3.029090000 | 0.117226000  |
| 1  | 0.071463000  | -2.960558000 | -0.527479000 |
| 1  | 1.416482000  | -4.003150000 | -0.056714000 |
| 1  | 0.612512000  | -3.012648000 | 1.156490000  |
| 6  | 3.617154000  | -1.955633000 | 0.990831000  |
| 1  | 3.883580000  | -3.016302000 | 0.973018000  |
| 1  | 4.508501000  | -1.387108000 | 0.721439000  |
| 1  | 3.353552000  | -1.700727000 | 2.019461000  |
| 6  | 4.049367000  | 1.492506000  | 0.617579000  |
| 1  | 4.766400000  | 0.777593000  | 0.207607000  |
| 1  | 4.511295000  | 2.482687000  | 0.580339000  |

|    |              |              |              |
|----|--------------|--------------|--------------|
| 1  | 3.883077000  | 1.240041000  | 1.667272000  |
| 6  | 2.921037000  | 1.610296000  | -2.189082000 |
| 1  | 3.394653000  | 2.578051000  | -2.376579000 |
| 1  | 3.633131000  | 0.834449000  | -2.475789000 |
| 1  | 2.055375000  | 1.535404000  | -2.850922000 |
| 6  | 2.908591000  | -1.895903000 | -1.943216000 |
| 1  | 3.833164000  | -1.326042000 | -2.064177000 |
| 1  | 3.150402000  | -2.949954000 | -2.103805000 |
| 1  | 2.215986000  | -1.589272000 | -2.730227000 |
| 6  | 1.499757000  | 3.051322000  | 0.080030000  |
| 1  | 0.535350000  | 3.093836000  | -0.434511000 |
| 1  | 1.312013000  | 3.120377000  | 1.154235000  |
| 1  | 2.070462000  | 3.937124000  | -0.211433000 |
| 14 | -0.971881000 | 0.215390000  | 1.677199000  |
| 6  | -1.540117000 | 1.873034000  | 2.321314000  |
| 1  | -1.156178000 | 2.687703000  | 1.702039000  |
| 1  | -2.631848000 | 1.932501000  | 2.316232000  |
| 1  | -1.203717000 | 2.036843000  | 3.348171000  |
| 6  | -1.698394000 | -1.119946000 | 2.758601000  |
| 1  | -1.409394000 | -2.115485000 | 2.413708000  |
| 1  | -1.363411000 | -1.005565000 | 3.792596000  |
| 1  | -2.790114000 | -1.065348000 | 2.757704000  |
| 6  | -2.776762000 | -0.026884000 | -0.409797000 |
| 6  | -3.430434000 | 1.141244000  | -0.791286000 |
| 6  | -3.471011000 | -1.232268000 | -0.451424000 |
| 6  | -4.752640000 | 1.103623000  | -1.199346000 |
| 1  | -2.881585000 | 2.077919000  | -0.760010000 |
| 6  | -4.793923000 | -1.266639000 | -0.856874000 |
| 1  | -2.951342000 | -2.140083000 | -0.160927000 |
| 6  | -5.439509000 | -0.099240000 | -1.231558000 |
| 1  | -5.250218000 | 2.020922000  | -1.493201000 |
| 1  | -5.322911000 | -2.212605000 | -0.882703000 |
| 1  | -6.474889000 | -0.127016000 | -1.549788000 |
| 1  | -0.205297000 | -1.079452000 | -2.063663000 |
| 1  | -0.199232000 | 1.278140000  | -1.954835000 |

**5Si<sup>H-H</sup>** (T.E.= -1585.806319)

|   |             |              |             |
|---|-------------|--------------|-------------|
| 6 | 0.555820000 | -0.362892000 | 1.462622000 |
| 6 | 1.216445000 | -0.079374000 | 0.085725000 |
| 1 | 0.756344000 | -1.380697000 | 1.820048000 |

|    |              |              |              |
|----|--------------|--------------|--------------|
| 1  | 0.931571000  | 0.285266000  | 2.261275000  |
| 14 | -0.243246000 | -0.056194000 | -1.067282000 |
| 7  | -1.469890000 | -0.133473000 | 0.186980000  |
| 14 | 2.402377000  | -1.489464000 | -0.330058000 |
| 14 | 1.952931000  | 1.666008000  | 0.116413000  |
| 6  | 1.428294000  | -3.087941000 | -0.471874000 |
| 1  | 0.860035000  | -3.128605000 | -1.403303000 |
| 1  | 2.118319000  | -3.935698000 | -0.466903000 |
| 1  | 0.725811000  | -3.233138000 | 0.352924000  |
| 6  | 3.674129000  | -1.718465000 | 1.024258000  |
| 1  | 4.200039000  | -2.663617000 | 0.865202000  |
| 1  | 4.419148000  | -0.921747000 | 1.032164000  |
| 1  | 3.217428000  | -1.760425000 | 2.015930000  |
| 6  | 3.393190000  | 1.765536000  | 1.308208000  |
| 1  | 4.283188000  | 1.286432000  | 0.893895000  |
| 1  | 3.638803000  | 2.814235000  | 1.494556000  |
| 1  | 3.175799000  | 1.298371000  | 2.271432000  |
| 6  | 2.550405000  | 2.226632000  | -1.567029000 |
| 1  | 2.777592000  | 3.295187000  | -1.517248000 |
| 1  | 3.462331000  | 1.712075000  | -1.874203000 |
| 1  | 1.802072000  | 2.087740000  | -2.350378000 |
| 6  | 3.271316000  | -1.183754000 | -1.958708000 |
| 1  | 4.033768000  | -0.406534000 | -1.872000000 |
| 1  | 3.767752000  | -2.099042000 | -2.290627000 |
| 1  | 2.571943000  | -0.884120000 | -2.744937000 |
| 6  | 0.628489000  | 2.861019000  | 0.697025000  |
| 1  | -0.240195000 | 2.873779000  | 0.033357000  |
| 1  | 0.275934000  | 2.639186000  | 1.706963000  |
| 1  | 1.045842000  | 3.871499000  | 0.711186000  |
| 6  | -2.869355000 | -0.085103000 | -0.038997000 |
| 6  | -3.713251000 | -1.039351000 | 0.514726000  |
| 6  | -3.397199000 | 0.912606000  | -0.847128000 |
| 6  | -5.070770000 | -0.989622000 | 0.259237000  |
| 1  | -3.298240000 | -1.812168000 | 1.149385000  |
| 6  | -4.756672000 | 0.951623000  | -1.106638000 |
| 1  | -2.736878000 | 1.667424000  | -1.261786000 |
| 6  | -5.597781000 | 0.002249000  | -0.553202000 |
| 1  | -5.723533000 | -1.735851000 | 0.697018000  |
| 1  | -5.158796000 | 1.734973000  | -1.738464000 |
| 1  | -6.662353000 | 0.035144000  | -0.752178000 |

|   |              |              |              |
|---|--------------|--------------|--------------|
| 6 | -0.955493000 | -0.237078000 | 1.464189000  |
| 8 | -1.610287000 | -0.249131000 | 2.478608000  |
| 1 | -0.397153000 | -1.191380000 | -2.002228000 |
| 1 | -0.389318000 | 1.177661000  | -1.870298000 |

**8SiP<sup>H-H</sup>** (T.E.= -1154.415569)

|    |              |              |              |
|----|--------------|--------------|--------------|
| 6  | 0.498450000  | -1.615534000 | 0.090452000  |
| 6  | -0.960148000 | -1.537070000 | 0.529245000  |
| 6  | -1.509959000 | -0.196944000 | 0.069415000  |
| 1  | 1.049077000  | -2.330400000 | 0.712436000  |
| 1  | 0.560284000  | -1.972468000 | -0.949400000 |
| 1  | -1.005192000 | -1.659394000 | 1.622325000  |
| 1  | -1.506180000 | -2.388379000 | 0.103425000  |
| 14 | -0.143467000 | 0.965647000  | 0.109999000  |
| 7  | 1.083876000  | -0.287521000 | 0.210017000  |
| 15 | -3.140291000 | 0.104888000  | -0.094815000 |
| 6  | -3.999301000 | -1.006065000 | -1.237238000 |
| 1  | -3.860725000 | -2.036869000 | -0.905854000 |
| 1  | -5.068751000 | -0.789773000 | -1.271500000 |
| 1  | -3.567237000 | -0.900691000 | -2.232654000 |
| 6  | -4.159823000 | -0.033063000 | 1.402868000  |
| 1  | -3.815882000 | 0.696172000  | 2.137633000  |
| 1  | -5.219905000 | 0.126419000  | 1.194218000  |
| 1  | -4.027795000 | -1.032693000 | 1.823417000  |
| 6  | -3.432766000 | 1.771507000  | -0.705468000 |
| 1  | -3.031712000 | 2.499192000  | 0.002240000  |
| 1  | -2.937489000 | 1.900385000  | -1.668327000 |
| 1  | -4.503412000 | 1.945993000  | -0.822001000 |
| 6  | 2.444190000  | -0.111276000 | 0.074677000  |
| 6  | 3.322473000  | -1.168568000 | -0.194115000 |
| 6  | 2.998926000  | 1.171126000  | 0.206380000  |
| 6  | 4.684175000  | -0.945131000 | -0.313420000 |
| 1  | 2.940942000  | -2.173876000 | -0.318592000 |
| 6  | 4.356126000  | 1.380155000  | 0.082843000  |
| 1  | 2.346906000  | 2.011776000  | 0.424563000  |
| 6  | 5.217965000  | 0.323562000  | -0.177278000 |
| 1  | 5.336381000  | -1.786524000 | -0.522214000 |
| 1  | 4.748010000  | 2.385397000  | 0.194098000  |
| 1  | 6.284136000  | 0.489319000  | -0.272519000 |
| 1  | 0.048259000  | 1.844160000  | -1.078443000 |

1 -0.005791000 1.896326000 1.269086000

**9SiP<sup>H-H</sup>** (T.E.= -1153.226561)

6 0.434419000 -1.569016000 0.162545000  
6 -0.907148000 -1.529168000 0.125996000  
6 -1.513842000 -0.206944000 0.024780000  
14 -0.135771000 0.965916000 0.014304000  
7 1.079436000 -0.314819000 0.105058000  
15 -3.165756000 0.065788000 -0.033888000  
6 -4.028826000 -0.728555000 -1.411953000  
1 -3.841303000 -1.803426000 -1.368939000  
1 -5.105571000 -0.553287000 -1.365443000  
1 -3.630916000 -0.347446000 -2.352813000  
6 -3.508463000 1.824660000 -0.173153000  
1 -4.584941000 1.997082000 -0.208525000  
1 -3.092170000 2.349149000 0.688449000  
1 -3.053018000 2.215855000 -1.084163000  
6 -4.103125000 -0.514312000 1.401858000  
1 -3.754645000 0.006928000 2.293855000  
1 -5.175207000 -0.353320000 1.272140000  
1 -3.916939000 -1.582333000 1.532457000  
6 2.449930000 -0.150085000 0.042345000  
6 3.345265000 -1.218333000 -0.091155000  
6 2.989708000 1.141843000 0.107347000  
6 4.708520000 -0.993132000 -0.150183000  
1 2.976599000 -2.233192000 -0.163639000  
6 4.351872000 1.353768000 0.043558000  
1 2.325406000 1.993263000 0.222523000  
6 5.229852000 0.288300000 -0.084179000  
1 5.375104000 -1.842445000 -0.255441000  
1 4.731719000 2.368090000 0.098703000  
1 6.299125000 0.453998000 -0.132371000  
1 1.023091000 -2.467462000 0.269275000  
1 -1.492835000 -2.441899000 0.185122000  
1 0.082186000 1.811453000 -1.193836000  
1 -0.023561000 1.928925000 1.148461000

**14SiP<sup>H-H</sup>** (T.E.= -1348.586265)

6 1.200529000 1.032423000 0.072255000  
6 1.658959000 -0.323353000 -0.014525000

|    |              |              |              |
|----|--------------|--------------|--------------|
| 7  | -0.980504000 | -0.219503000 | -0.205218000 |
| 6  | -2.320918000 | -0.599446000 | -0.009316000 |
| 6  | -3.047756000 | -0.119128000 | 1.079037000  |
| 6  | -4.359101000 | -0.508720000 | 1.276811000  |
| 6  | -4.967642000 | -1.400327000 | 0.406002000  |
| 6  | -4.246976000 | -1.897619000 | -0.666054000 |
| 6  | -2.936914000 | -1.500170000 | -0.874941000 |
| 1  | -2.565528000 | 0.566257000  | 1.768127000  |
| 1  | -4.909120000 | -0.119925000 | 2.126482000  |
| 1  | -5.994407000 | -1.707168000 | 0.565786000  |
| 1  | -4.709143000 | -2.596314000 | -1.354340000 |
| 1  | -2.380434000 | -1.872028000 | -1.729365000 |
| 5  | -0.408585000 | 1.109595000  | -0.125749000 |
| 7  | -1.121841000 | 2.311177000  | -0.292006000 |
| 6  | -0.561654000 | 3.610300000  | 0.015143000  |
| 1  | -0.567626000 | 4.253853000  | -0.873264000 |
| 1  | -1.163219000 | 4.111935000  | 0.783973000  |
| 1  | 0.463113000  | 3.505479000  | 0.364314000  |
| 6  | -2.475826000 | 2.415009000  | -0.782538000 |
| 1  | -3.179927000 | 2.696302000  | 0.011894000  |
| 1  | -2.527003000 | 3.189844000  | -1.555686000 |
| 1  | -2.819405000 | 1.479488000  | -1.219749000 |
| 15 | 3.336856000  | -0.595312000 | 0.080863000  |
| 6  | 4.079016000  | -0.068798000 | 1.633718000  |
| 1  | 5.158326000  | -0.231741000 | 1.621950000  |
| 1  | 3.864004000  | 0.991509000  | 1.766152000  |
| 1  | 3.631255000  | -0.629905000 | 2.454403000  |
| 6  | 4.295735000  | 0.221756000  | -1.205217000 |
| 1  | 5.361035000  | 0.020732000  | -1.077566000 |
| 1  | 3.968124000  | -0.139663000 | -2.180436000 |
| 1  | 4.109588000  | 1.293507000  | -1.139950000 |
| 6  | 3.684198000  | -2.352827000 | -0.074896000 |
| 1  | 3.172880000  | -2.898124000 | 0.720159000  |
| 1  | 3.324313000  | -2.713640000 | -1.039890000 |
| 1  | 4.757236000  | -2.535705000 | -0.001501000 |
| 8  | 1.968253000  | 1.998835000  | 0.239238000  |
| 14 | 0.263863000  | -1.449577000 | -0.247216000 |
| 1  | 0.258202000  | -2.222449000 | -1.519108000 |
| 1  | 0.004227000  | -2.453470000 | 0.818237000  |

**1Ge<sup>PH-H</sup> (T.E.= -3299.187182)**

|    |              |              |              |
|----|--------------|--------------|--------------|
| 6  | -0.890193000 | 0.327066000  | 1.687258000  |
| 6  | 0.593201000  | -0.016555000 | 1.720052000  |
| 6  | 1.216069000  | -0.005067000 | 0.297222000  |
| 1  | -1.361955000 | 0.018062000  | 2.628361000  |
| 1  | -1.034408000 | 1.417249000  | 1.612720000  |
| 1  | 0.691774000  | -1.014415000 | 2.163474000  |
| 1  | 1.120553000  | 0.669873000  | 2.391250000  |
| 32 | -0.212375000 | -0.923820000 | -0.664616000 |
| 7  | -1.496647000 | -0.361069000 | 0.566559000  |
| 14 | 1.372447000  | 1.759689000  | -0.378541000 |
| 14 | 2.806987000  | -1.015706000 | 0.248670000  |
| 6  | 2.613848000  | -2.573216000 | 1.276692000  |
| 1  | 1.726079000  | -3.147896000 | 0.999981000  |
| 1  | 3.485744000  | -3.211606000 | 1.109405000  |
| 1  | 2.562355000  | -2.362912000 | 2.347123000  |
| 6  | 3.201022000  | -1.570782000 | -1.497999000 |
| 1  | 3.389245000  | -0.744621000 | -2.183910000 |
| 1  | 4.094584000  | -2.200774000 | -1.483588000 |
| 1  | 2.387845000  | -2.175155000 | -1.911345000 |
| 6  | 4.249877000  | -0.059992000 | 0.967440000  |
| 1  | 4.015718000  | 0.284338000  | 1.978908000  |
| 1  | 5.127809000  | -0.707847000 | 1.033784000  |
| 1  | 4.522574000  | 0.811758000  | 0.368567000  |
| 6  | 2.483974000  | 1.829669000  | -1.885434000 |
| 1  | 2.112001000  | 1.183473000  | -2.685313000 |
| 1  | 2.480786000  | 2.854839000  | -2.266444000 |
| 1  | 3.520625000  | 1.556934000  | -1.679163000 |
| 6  | -0.260909000 | 2.501825000  | -0.939103000 |
| 1  | -1.037220000 | 2.494623000  | -0.171905000 |
| 1  | -0.077279000 | 3.544941000  | -1.213812000 |
| 1  | -0.661019000 | 1.999558000  | -1.823240000 |
| 6  | 2.064315000  | 2.879065000  | 0.956270000  |
| 1  | 1.350185000  | 3.025240000  | 1.770428000  |
| 1  | 2.991713000  | 2.493512000  | 1.384658000  |
| 1  | 2.275028000  | 3.862318000  | 0.527202000  |
| 6  | -2.845290000 | -0.244796000 | 0.320344000  |
| 6  | -3.425634000 | -0.922465000 | -0.762361000 |
| 6  | -3.688519000 | 0.531831000  | 1.125518000  |
| 6  | -4.775667000 | -0.825185000 | -1.025045000 |

|   |              |              |              |
|---|--------------|--------------|--------------|
| 1 | -2.802137000 | -1.547339000 | -1.395968000 |
| 6 | -5.042947000 | 0.619223000  | 0.850912000  |
| 1 | -3.283263000 | 1.071183000  | 1.972531000  |
| 6 | -5.602105000 | -0.052363000 | -0.221659000 |
| 1 | -5.190013000 | -1.365767000 | -1.868960000 |
| 1 | -5.669325000 | 1.228913000  | 1.493244000  |
| 1 | -6.662586000 | 0.020965000  | -0.428883000 |
| 1 | -0.130373000 | -2.468531000 | -0.678610000 |
| 1 | -0.530829000 | -0.426496000 | -2.091114000 |

**2Ge<sup>P<sup>H</sup>-H</sup>** (T.E.= -3297.995708)

|    |              |              |              |
|----|--------------|--------------|--------------|
| 6  | 1.208493000  | 0.019484000  | 0.257863000  |
| 6  | 0.503185000  | 0.111968000  | 1.591332000  |
| 6  | -0.822759000 | -0.055892000 | 1.647817000  |
| 1  | 1.069303000  | 0.319081000  | 2.493795000  |
| 1  | -1.386233000 | 0.009858000  | 2.571601000  |
| 32 | -0.239234000 | -0.682466000 | -0.865246000 |
| 7  | -1.508818000 | -0.379685000 | 0.483911000  |
| 14 | 2.629619000  | -1.218667000 | 0.307500000  |
| 14 | 1.608838000  | 1.795191000  | -0.268800000 |
| 6  | 3.173894000  | -1.671578000 | -1.428142000 |
| 1  | 3.939596000  | -2.450222000 | -1.377125000 |
| 1  | 2.350973000  | -2.066214000 | -2.030325000 |
| 1  | 3.601784000  | -0.819726000 | -1.960144000 |
| 6  | 2.577511000  | 2.674827000  | 1.069468000  |
| 1  | 3.552139000  | 2.221494000  | 1.253873000  |
| 1  | 2.741903000  | 3.712775000  | 0.767595000  |
| 1  | 2.023520000  | 2.689261000  | 2.010907000  |
| 6  | 2.588544000  | 1.821997000  | -1.865607000 |
| 1  | 2.112555000  | 1.224782000  | -2.648193000 |
| 1  | 2.667147000  | 2.848166000  | -2.233721000 |
| 1  | 3.603876000  | 1.443388000  | -1.724461000 |
| 6  | 0.020740000  | 2.761619000  | -0.511463000 |
| 1  | -0.568967000 | 2.414010000  | -1.362469000 |
| 1  | -0.608919000 | 2.713432000  | 0.380625000  |
| 1  | 0.267641000  | 3.812070000  | -0.688306000 |
| 6  | 4.105674000  | -0.542659000 | 1.242010000  |
| 1  | 4.847619000  | -1.334135000 | 1.377107000  |
| 1  | 4.588313000  | 0.277112000  | 0.704462000  |
| 1  | 3.825047000  | -0.177754000 | 2.233499000  |



|   |              |              |              |
|---|--------------|--------------|--------------|
| 6 | 2.039226000  | -2.761660000 | 1.187364000  |
| 1 | 2.819374000  | -3.527001000 | 1.174465000  |
| 1 | 1.794656000  | -2.545325000 | 2.229806000  |
| 1 | 1.147123000  | -3.184703000 | 0.718365000  |
| 6 | -2.873692000 | -0.225096000 | 0.317669000  |
| 6 | -3.495578000 | -0.784609000 | -0.803345000 |
| 6 | -3.666838000 | 0.487361000  | 1.222411000  |
| 6 | -4.853884000 | -0.645487000 | -1.005770000 |
| 1 | -2.899081000 | -1.349720000 | -1.514193000 |
| 6 | -5.028754000 | 0.610109000  | 1.014823000  |
| 1 | -3.212053000 | 0.966668000  | 2.080980000  |
| 6 | -5.636515000 | 0.048346000  | -0.095729000 |
| 1 | -5.307422000 | -1.091916000 | -1.883737000 |
| 1 | -5.621419000 | 1.168686000  | 1.730968000  |
| 1 | -6.702852000 | 0.153821000  | -0.253008000 |
| 1 | -0.179861000 | -2.192187000 | -1.198470000 |
| 1 | -0.622433000 | 0.097304000  | -2.139421000 |

**3Ge<sup>P<sup>H</sup>-H</sup>** (T.E.= -3419.289627)

|    |              |              |              |
|----|--------------|--------------|--------------|
| 6  | 0.695686000  | 0.993599000  | -1.028573000 |
| 6  | 1.435253000  | -0.050791000 | -0.124038000 |
| 1  | 1.210121000  | 1.961272000  | -0.981083000 |
| 1  | 0.760687000  | 0.698610000  | -2.087832000 |
| 7  | -1.388786000 | -0.089477000 | -0.075985000 |
| 5  | -0.848632000 | 1.110215000  | -0.656882000 |
| 7  | -1.573583000 | 2.311802000  | -0.846758000 |
| 6  | -1.044542000 | 3.425589000  | -1.594876000 |
| 1  | -1.809299000 | 3.837263000  | -2.264166000 |
| 1  | -0.718023000 | 4.241532000  | -0.933773000 |
| 1  | -0.198566000 | 3.123828000  | -2.210567000 |
| 6  | -2.801018000 | 2.653386000  | -0.169537000 |
| 1  | -3.642840000 | 2.766212000  | -0.865182000 |
| 1  | -3.070585000 | 1.900570000  | 0.569287000  |
| 1  | -2.678709000 | 3.609014000  | 0.356133000  |
| 14 | 2.047183000  | 0.833663000  | 1.426839000  |
| 14 | 2.741441000  | -0.933378000 | -1.148258000 |
| 6  | 0.653407000  | 1.870627000  | 2.142340000  |
| 1  | -0.221774000 | 1.267382000  | 2.401794000  |
| 1  | 1.002318000  | 2.363016000  | 3.054151000  |
| 1  | 0.327242000  | 2.649896000  | 1.447408000  |

|    |              |              |              |
|----|--------------|--------------|--------------|
| 6  | 3.476943000  | 1.983437000  | 1.039392000  |
| 1  | 3.681827000  | 2.607967000  | 1.913206000  |
| 1  | 4.385709000  | 1.418184000  | 0.817299000  |
| 1  | 3.275033000  | 2.646707000  | 0.195538000  |
| 6  | 3.835347000  | 0.294900000  | -2.048120000 |
| 1  | 4.502177000  | -0.247991000 | -2.723608000 |
| 1  | 3.245790000  | 0.987237000  | -2.653583000 |
| 1  | 4.454849000  | 0.884982000  | -1.371471000 |
| 6  | 3.811483000  | -2.058383000 | -0.098450000 |
| 1  | 4.432155000  | -2.688838000 | -0.740381000 |
| 1  | 4.478400000  | -1.492259000 | 0.556462000  |
| 1  | 3.204774000  | -2.719487000 | 0.528215000  |
| 6  | 2.642359000  | -0.333567000 | 2.767945000  |
| 1  | 3.534273000  | -0.886977000 | 2.469073000  |
| 1  | 2.903292000  | 0.260600000  | 3.648593000  |
| 1  | 1.881729000  | -1.054671000 | 3.072382000  |
| 6  | 1.913061000  | -1.993516000 | -2.459715000 |
| 1  | 1.509303000  | -2.915409000 | -2.035381000 |
| 1  | 1.092035000  | -1.473167000 | -2.959985000 |
| 1  | 2.644170000  | -2.270900000 | -3.223600000 |
| 32 | -0.014939000 | -1.255689000 | 0.409741000  |
| 6  | -2.729073000 | -0.488845000 | 0.018261000  |
| 6  | -3.593227000 | -0.354923000 | -1.068764000 |
| 6  | -3.227227000 | -1.050860000 | 1.192968000  |
| 6  | -4.915050000 | -0.746766000 | -0.972165000 |
| 1  | -3.209004000 | 0.065525000  | -1.992307000 |
| 6  | -4.548995000 | -1.452654000 | 1.281660000  |
| 1  | -2.567220000 | -1.148946000 | 2.049433000  |
| 6  | -5.402968000 | -1.298127000 | 0.202893000  |
| 1  | -5.569854000 | -0.629735000 | -1.828463000 |
| 1  | -4.915374000 | -1.881435000 | 2.207745000  |
| 1  | -6.438476000 | -1.608556000 | 0.274266000  |
| 1  | -0.186086000 | -2.582147000 | -0.367033000 |
| 1  | -0.091639000 | -1.577225000 | 1.921873000  |

**4Ge<sup>P<sup>H</sup>-H</sup>** (T.E.= -3629.196543)

|   |             |              |             |
|---|-------------|--------------|-------------|
| 6 | 0.886581000 | 0.534608000  | 1.489845000 |
| 6 | 1.436027000 | 0.022889000  | 0.112810000 |
| 1 | 1.150215000 | -0.158528000 | 2.298820000 |
| 1 | 1.362339000 | 1.480015000  | 1.778271000 |

|    |              |              |              |
|----|--------------|--------------|--------------|
| 7  | -1.481417000 | 0.175722000  | 0.024299000  |
| 14 | 2.218856000  | -1.666713000 | 0.401468000  |
| 14 | 2.547110000  | 1.339281000  | -0.647482000 |
| 6  | 0.910541000  | -2.828698000 | 1.085287000  |
| 1  | 0.038237000  | -2.922988000 | 0.434034000  |
| 1  | 1.339957000  | -3.826044000 | 1.213468000  |
| 1  | 0.562527000  | -2.495458000 | 2.066626000  |
| 6  | 3.589201000  | -1.605711000 | 1.681118000  |
| 1  | 3.852626000  | -2.629956000 | 1.960288000  |
| 1  | 4.490926000  | -1.125663000 | 1.298310000  |
| 1  | 3.290039000  | -1.085071000 | 2.593502000  |
| 6  | 4.114653000  | 1.588128000  | 0.350975000  |
| 1  | 4.821221000  | 0.770813000  | 0.187853000  |
| 1  | 4.602918000  | 2.515572000  | 0.040159000  |
| 1  | 3.918169000  | 1.655728000  | 1.423647000  |
| 6  | 3.056781000  | 0.930492000  | -2.405227000 |
| 1  | 3.604018000  | 1.783601000  | -2.816319000 |
| 1  | 3.719081000  | 0.064285000  | -2.450341000 |
| 1  | 2.206586000  | 0.741350000  | -3.064354000 |
| 6  | 2.941531000  | -2.391777000 | -1.168243000 |
| 1  | 3.880961000  | -1.896713000 | -1.426824000 |
| 1  | 3.160773000  | -3.451694000 | -1.015493000 |
| 1  | 2.271587000  | -2.311276000 | -2.027431000 |
| 6  | 1.621021000  | 2.972585000  | -0.675677000 |
| 1  | 0.671176000  | 2.901306000  | -1.212634000 |
| 1  | 1.413393000  | 3.344693000  | 0.330417000  |
| 1  | 2.230463000  | 3.725545000  | -1.182724000 |
| 14 | -0.988939000 | 0.773948000  | 1.571154000  |
| 6  | -1.420541000 | 2.572335000  | 1.847177000  |
| 1  | -1.065844000 | 3.191631000  | 1.019324000  |
| 1  | -2.500998000 | 2.710776000  | 1.937013000  |
| 1  | -0.961192000 | 2.941888000  | 2.768101000  |
| 6  | -1.794351000 | -0.242151000 | 2.913810000  |
| 1  | -1.582709000 | -1.305407000 | 2.774217000  |
| 1  | -1.450776000 | 0.052220000  | 3.908165000  |
| 1  | -2.879837000 | -0.113009000 | 2.883385000  |
| 32 | -0.087507000 | -0.243375000 | -1.114488000 |
| 6  | -2.826202000 | -0.059579000 | -0.316771000 |
| 6  | -3.295517000 | -1.357508000 | -0.517032000 |
| 6  | -3.728485000 | 0.996727000  | -0.431814000 |

|   |              |              |              |
|---|--------------|--------------|--------------|
| 6 | -4.623611000 | -1.589610000 | -0.826113000 |
| 1 | -2.600486000 | -2.185182000 | -0.412003000 |
| 6 | -5.059727000 | 0.760312000  | -0.729626000 |
| 1 | -3.363923000 | 2.009372000  | -0.293850000 |
| 6 | -5.514033000 | -0.532501000 | -0.930841000 |
| 1 | -4.968592000 | -2.606544000 | -0.976219000 |
| 1 | -5.745920000 | 1.595637000  | -0.813234000 |
| 1 | -6.555074000 | -0.716074000 | -1.168793000 |
| 1 | -0.130657000 | 0.713066000  | -2.333599000 |
| 1 | -0.252657000 | -1.684413000 | -1.658289000 |

**5Ge<sup>P<sup>H</sup>-H</sup>** (T.E.= -3373.253489)

|    |              |              |              |
|----|--------------|--------------|--------------|
| 6  | 0.567280000  | -0.357999000 | 1.538804000  |
| 6  | 1.272130000  | -0.073588000 | 0.187880000  |
| 1  | 0.738027000  | -1.386112000 | 1.884313000  |
| 1  | 0.948904000  | 0.266869000  | 2.352948000  |
| 7  | -1.492242000 | -0.136982000 | 0.293338000  |
| 14 | 2.482681000  | -1.473216000 | -0.185974000 |
| 14 | 1.973715000  | 1.684500000  | 0.212429000  |
| 6  | 1.528911000  | -3.081314000 | -0.356890000 |
| 1  | 0.997552000  | -3.131439000 | -1.309755000 |
| 1  | 2.224380000  | -3.923772000 | -0.321534000 |
| 1  | 0.795629000  | -3.227418000 | 0.440471000  |
| 6  | 3.711647000  | -1.679899000 | 1.211316000  |
| 1  | 4.255483000  | -2.618753000 | 1.078074000  |
| 1  | 4.445287000  | -0.872908000 | 1.239454000  |
| 1  | 3.220982000  | -1.720312000 | 2.186812000  |
| 6  | 3.407286000  | 1.813183000  | 1.409518000  |
| 1  | 4.303535000  | 1.333860000  | 1.008821000  |
| 1  | 3.644285000  | 2.866314000  | 1.581528000  |
| 1  | 3.186275000  | 1.359063000  | 2.378191000  |
| 6  | 2.569263000  | 2.244159000  | -1.472852000 |
| 1  | 2.815282000  | 3.308289000  | -1.417371000 |
| 1  | 3.469104000  | 1.716192000  | -1.792556000 |
| 1  | 1.812536000  | 2.126172000  | -2.251793000 |
| 6  | 3.398823000  | -1.167612000 | -1.788945000 |
| 1  | 4.142629000  | -0.374314000 | -1.687841000 |
| 1  | 3.923298000  | -2.076566000 | -2.094048000 |
| 1  | 2.718415000  | -0.891381000 | -2.600215000 |
| 6  | 0.630334000  | 2.865529000  | 0.777338000  |

|    |              |              |              |
|----|--------------|--------------|--------------|
| 1  | -0.238208000 | 2.865093000  | 0.113234000  |
| 1  | 0.278124000  | 2.645858000  | 1.787852000  |
| 1  | 1.035266000  | 3.881202000  | 0.785514000  |
| 6  | -2.891119000 | -0.089280000 | 0.091315000  |
| 6  | -3.734070000 | -1.012893000 | 0.698756000  |
| 6  | -3.429435000 | 0.874121000  | -0.752212000 |
| 6  | -5.095210000 | -0.965783000 | 0.462226000  |
| 1  | -3.315177000 | -1.761657000 | 1.358906000  |
| 6  | -4.792439000 | 0.911472000  | -0.991263000 |
| 1  | -2.772425000 | 1.605875000  | -1.211746000 |
| 6  | -5.630625000 | -0.007304000 | -0.383997000 |
| 1  | -5.744510000 | -1.689076000 | 0.941915000  |
| 1  | -5.199895000 | 1.668837000  | -1.650882000 |
| 1  | -6.698056000 | 0.023336000  | -0.567446000 |
| 6  | -0.945146000 | -0.205051000 | 1.548206000  |
| 8  | -1.571826000 | -0.178350000 | 2.584360000  |
| 32 | -0.216876000 | -0.088858000 | -1.078254000 |
| 1  | -0.415932000 | -1.318782000 | -1.984490000 |
| 1  | -0.405781000 | 1.190235000  | -1.918054000 |

**8Ge<sup>P<sup>H</sup>-H</sup>** (T.E.= -2941.858049)

|    |              |              |              |
|----|--------------|--------------|--------------|
| 6  | -0.528667000 | 1.712614000  | 0.148492000  |
| 6  | 0.926381000  | 1.622611000  | 0.593230000  |
| 6  | 1.517113000  | 0.336396000  | 0.052128000  |
| 1  | -1.064236000 | 2.447825000  | 0.760973000  |
| 1  | -0.576034000 | 2.061771000  | -0.896246000 |
| 1  | 0.954114000  | 1.674833000  | 1.693235000  |
| 1  | 1.459820000  | 2.510505000  | 0.230857000  |
| 32 | 0.139614000  | -0.950108000 | 0.109402000  |
| 7  | -1.143834000 | 0.404957000  | 0.285499000  |
| 15 | 3.149817000  | 0.065573000  | -0.132251000 |
| 6  | 3.979238000  | 1.265850000  | -1.204111000 |
| 1  | 3.821530000  | 2.269720000  | -0.805436000 |
| 1  | 5.052800000  | 1.075323000  | -1.257064000 |
| 1  | 3.542790000  | 1.216622000  | -2.201870000 |
| 6  | 3.457499000  | -1.554004000 | -0.852907000 |
| 1  | 3.090477000  | -2.331562000 | -0.180406000 |
| 1  | 2.938986000  | -1.634210000 | -1.808795000 |
| 1  | 4.527897000  | -1.699181000 | -1.005421000 |
| 6  | 4.197933000  | 0.109968000  | 1.354674000  |

|   |              |              |              |
|---|--------------|--------------|--------------|
| 1 | 5.254597000  | -0.032911000 | 1.117082000  |
| 1 | 4.072234000  | 1.080045000  | 1.841021000  |
| 1 | 3.869853000  | -0.666064000 | 2.047812000  |
| 6 | -2.493744000 | 0.243774000  | 0.094410000  |
| 6 | -3.070116000 | -1.034537000 | 0.184010000  |
| 6 | -3.354789000 | 1.315660000  | -0.184704000 |
| 6 | -4.424348000 | -1.225665000 | 0.011887000  |
| 1 | -2.435795000 | -1.887424000 | 0.408382000  |
| 6 | -4.713660000 | 1.109144000  | -0.352641000 |
| 1 | -2.959289000 | 2.319152000  | -0.276810000 |
| 6 | -5.266554000 | -0.155561000 | -0.258009000 |
| 1 | -4.830105000 | -2.228530000 | 0.091786000  |
| 1 | -5.349150000 | 1.961821000  | -0.567840000 |
| 1 | -6.330524000 | -0.307654000 | -0.392194000 |
| 1 | 0.008747000  | -1.913008000 | 1.324609000  |
| 1 | -0.114505000 | -1.809402000 | -1.158019000 |

**9Ge<sup>P<sup>H</sup>-H</sup>** (T.E.= -2940.671599)

|    |              |              |              |
|----|--------------|--------------|--------------|
| 6  | 0.468222000  | 1.668971000  | 0.145771000  |
| 6  | -0.875607000 | 1.636343000  | 0.109440000  |
| 6  | -1.527468000 | 0.340059000  | 0.019899000  |
| 7  | 1.138357000  | 0.436781000  | 0.103020000  |
| 15 | -3.182974000 | 0.100892000  | -0.032054000 |
| 6  | -4.108818000 | 0.702770000  | 1.404025000  |
| 1  | -3.898102000 | 1.766472000  | 1.533225000  |
| 1  | -5.184501000 | 0.566270000  | 1.275484000  |
| 1  | -3.771337000 | 0.175165000  | 2.296544000  |
| 6  | -3.565097000 | -1.650375000 | -0.167926000 |
| 1  | -4.645509000 | -1.796748000 | -0.201847000 |
| 1  | -3.121054000 | -2.053281000 | -1.079531000 |
| 1  | -3.161417000 | -2.183839000 | 0.694243000  |
| 6  | -4.037310000 | 0.911237000  | -1.407903000 |
| 1  | -3.656202000 | 0.515988000  | -2.349905000 |
| 1  | -5.118014000 | 0.764913000  | -1.352845000 |
| 1  | -3.821173000 | 1.980972000  | -1.371292000 |
| 32 | -0.134012000 | -0.945165000 | 0.011102000  |
| 6  | 2.503437000  | 0.284133000  | 0.040308000  |
| 6  | 3.060101000  | -1.003378000 | 0.087264000  |
| 6  | 3.392532000  | 1.363609000  | -0.073283000 |
| 6  | 4.424344000  | -1.200018000 | 0.026256000  |

|   |              |              |              |
|---|--------------|--------------|--------------|
| 1 | 2.405494000  | -1.864668000 | 0.184574000  |
| 6 | 4.757449000  | 1.152124000  | -0.130391000 |
| 1 | 3.015329000  | 2.376459000  | -0.129249000 |
| 6 | 5.293192000  | -0.124722000 | -0.081949000 |
| 1 | 4.813628000  | -2.211580000 | 0.067219000  |
| 1 | 5.415393000  | 2.010152000  | -0.219690000 |
| 1 | 6.364199000  | -0.278769000 | -0.128630000 |
| 1 | 1.042922000  | 2.578573000  | 0.240727000  |
| 1 | -1.442818000 | 2.561634000  | 0.159315000  |
| 1 | 0.112650000  | -1.802036000 | -1.261218000 |
| 1 | 0.005152000  | -1.915750000 | 1.218223000  |

**$^{14}\text{Ge}^{\text{H-H}}$  (T.E.= -3136.029186)**

|    |              |              |              |
|----|--------------|--------------|--------------|
| 6  | 1.152161000  | 1.170953000  | 0.111620000  |
| 6  | 1.656061000  | -0.161850000 | 0.004864000  |
| 7  | -1.055187000 | -0.066553000 | -0.203169000 |
| 6  | -2.383893000 | -0.436255000 | 0.032436000  |
| 6  | -3.128458000 | 0.162635000  | 1.051274000  |
| 6  | -4.433067000 | -0.222873000 | 1.294063000  |
| 6  | -5.025252000 | -1.226864000 | 0.543023000  |
| 6  | -4.290611000 | -1.840761000 | -0.457448000 |
| 6  | -2.987557000 | -1.449638000 | -0.712273000 |
| 1  | -2.662945000 | 0.934308000  | 1.655141000  |
| 1  | -4.990517000 | 0.259156000  | 2.089625000  |
| 1  | -6.046585000 | -1.530070000 | 0.739703000  |
| 1  | -4.736852000 | -2.628929000 | -1.053639000 |
| 1  | -2.424545000 | -1.919314000 | -1.513445000 |
| 5  | -0.452468000 | 1.243934000  | -0.133858000 |
| 7  | -1.143141000 | 2.452994000  | -0.358196000 |
| 6  | -0.588648000 | 3.757972000  | -0.068496000 |
| 1  | -0.547548000 | 4.371685000  | -0.977135000 |
| 1  | -1.222698000 | 4.289631000  | 0.652897000  |
| 1  | 0.416946000  | 3.658422000  | 0.333612000  |
| 6  | -2.472346000 | 2.548411000  | -0.911858000 |
| 1  | -3.210132000 | 2.862462000  | -0.161058000 |
| 1  | -2.483110000 | 3.295550000  | -1.713659000 |
| 1  | -2.802866000 | 1.599165000  | -1.329537000 |
| 15 | 3.337511000  | -0.386195000 | 0.148119000  |
| 6  | 4.013308000  | 0.059051000  | 1.757066000  |
| 1  | 5.096250000  | -0.077793000 | 1.774414000  |

|    |              |              |              |
|----|--------------|--------------|--------------|
| 1  | 3.768318000  | 1.103608000  | 1.948832000  |
| 1  | 3.551721000  | -0.563030000 | 2.524402000  |
| 6  | 4.312518000  | 0.542703000  | -1.046718000 |
| 1  | 5.379574000  | 0.389655000  | -0.874706000 |
| 1  | 4.051721000  | 0.218204000  | -2.054455000 |
| 1  | 4.062838000  | 1.597591000  | -0.933799000 |
| 6  | 3.749141000  | -2.118653000 | -0.104584000 |
| 1  | 3.244032000  | -2.730152000 | 0.645093000  |
| 1  | 3.420958000  | -2.431156000 | -1.097380000 |
| 1  | 4.826540000  | -2.268242000 | -0.020287000 |
| 8  | 1.898276000  | 2.145305000  | 0.337378000  |
| 32 | 0.252671000  | -1.401511000 | -0.283707000 |
| 1  | 0.234302000  | -2.134753000 | -1.649644000 |
| 1  | -0.049261000 | -2.450891000 | 0.813860000  |

Cartesian coordinates of the N – H splitting product obtained for CAASis (**1Si-5Si**, **8Si-9Si** and **14Si**), CAAGes (**1Ge-5Ge**, **8Ge-9Ge** and **14Ge**) and NacNacSi (**IIa**), along with their total energies (in hartrees) including zero point vibrational correction.

**1SiP<sup>N-H</sup>** (T.E.= -1567.109882)

|    |              |              |              |
|----|--------------|--------------|--------------|
| 6  | -0.882387000 | -0.323867000 | -1.707073000 |
| 6  | 0.597212000  | 0.033376000  | -1.759228000 |
| 6  | 1.183683000  | 0.074567000  | -0.321434000 |
| 1  | -1.388308000 | 0.000931000  | -2.624100000 |
| 1  | -1.014880000 | -1.414214000 | -1.647830000 |
| 1  | 0.687641000  | 1.019843000  | -2.228632000 |
| 1  | 1.136837000  | -0.664111000 | -2.408178000 |
| 7  | -1.452784000 | 0.340926000  | -0.547788000 |
| 14 | -0.214878000 | 0.957314000  | 0.531633000  |
| 14 | 1.378775000  | -1.675753000 | 0.374864000  |
| 14 | 2.763685000  | 1.101855000  | -0.275395000 |
| 6  | 3.135358000  | 1.745503000  | 1.444114000  |
| 1  | 3.218819000  | 0.960594000  | 2.196106000  |
| 1  | 4.084161000  | 2.289063000  | 1.419454000  |
| 1  | 2.364783000  | 2.446902000  | 1.774194000  |
| 6  | 2.585335000  | 2.607033000  | -1.383617000 |
| 1  | 1.687763000  | 3.188294000  | -1.158457000 |
| 1  | 3.450323000  | 3.257017000  | -1.223765000 |
| 1  | 2.564607000  | 2.345369000  | -2.443884000 |
| 6  | 4.244298000  | 0.151015000  | -0.924961000 |



|   |              |              |              |
|---|--------------|--------------|--------------|
| 1 | 5.102747000  | 0.824802000  | -0.993863000 |
| 1 | 4.530558000  | -0.688511000 | -0.288019000 |
| 1 | 4.046852000  | -0.235460000 | -1.928885000 |
| 6 | 2.431103000  | -1.709060000 | 1.924403000  |
| 1 | 2.459940000  | -2.736801000 | 2.297330000  |
| 1 | 3.462326000  | -1.392636000 | 1.755085000  |
| 1 | 2.006103000  | -1.080730000 | 2.710454000  |
| 6 | -0.250645000 | -2.509986000 | 0.827872000  |
| 1 | -0.905760000 | -1.931205000 | 1.481436000  |
| 1 | -0.835033000 | -2.769088000 | -0.058100000 |
| 1 | -0.014954000 | -3.445559000 | 1.344391000  |
| 6 | 2.154022000  | -2.797536000 | -0.912840000 |
| 1 | 3.093803000  | -2.407843000 | -1.307744000 |
| 1 | 2.358083000  | -3.770703000 | -0.457499000 |
| 1 | 1.476311000  | -2.968339000 | -1.753081000 |
| 6 | -2.819494000 | 0.282266000  | -0.336835000 |
| 6 | -3.647190000 | -0.562920000 | -1.084175000 |
| 6 | -3.422862000 | 1.081453000  | 0.643599000  |
| 6 | -5.010827000 | -0.609754000 | -0.847572000 |
| 1 | -3.223624000 | -1.193275000 | -1.855602000 |
| 6 | -4.781969000 | 1.022984000  | 0.872439000  |
| 1 | -2.811740000 | 1.764318000  | 1.223197000  |
| 6 | -5.592559000 | 0.175187000  | 0.130958000  |
| 1 | -5.624793000 | -1.275913000 | -1.443960000 |
| 1 | -5.216712000 | 1.657946000  | 1.636642000  |
| 1 | -6.659988000 | 0.135186000  | 0.310427000  |
| 1 | -0.120185000 | 2.436984000  | 0.456821000  |
| 7 | -0.424020000 | 0.673733000  | 2.199444000  |
| 1 | -0.635931000 | -0.218738000 | 2.612465000  |
| 1 | -0.666716000 | 1.433863000  | 2.812673000  |

**2SiP<sup>N-H</sup>** (T.E.= -1565.916803)

|    |              |              |              |
|----|--------------|--------------|--------------|
| 6  | -1.170802000 | -0.069797000 | -0.266610000 |
| 6  | -0.521655000 | 0.025404000  | -1.628297000 |
| 6  | 0.805523000  | -0.125516000 | -1.678906000 |
| 1  | -1.102637000 | 0.215982000  | -2.524239000 |
| 1  | 1.395879000  | -0.068624000 | -2.586362000 |
| 14 | 0.231152000  | -0.800101000 | 0.736382000  |
| 7  | 1.457358000  | -0.435382000 | -0.482689000 |
| 14 | -2.636904000 | -1.253091000 | -0.260262000 |

|    |              |              |              |
|----|--------------|--------------|--------------|
| 14 | -1.545656000 | 1.718101000  | 0.233223000  |
| 6  | -4.150995000 | -0.512842000 | -1.078624000 |
| 1  | -4.932651000 | -1.273870000 | -1.150552000 |
| 1  | -4.556909000 | 0.329990000  | -0.514451000 |
| 1  | -3.928699000 | -0.168618000 | -2.092181000 |
| 6  | -3.077378000 | -1.746189000 | 1.492978000  |
| 1  | -3.912740000 | -2.451311000 | 1.472186000  |
| 1  | -2.242868000 | -2.239918000 | 1.997172000  |
| 1  | -3.377651000 | -0.890814000 | 2.101311000  |
| 6  | -2.168677000 | -2.784817000 | -1.230109000 |
| 1  | -2.977197000 | -3.519512000 | -1.189788000 |
| 1  | -1.988985000 | -2.539772000 | -2.279693000 |
| 1  | -1.264274000 | -3.257679000 | -0.839782000 |
| 6  | -2.569691000 | 1.816020000  | 1.798711000  |
| 1  | -2.636839000 | 2.856155000  | 2.128875000  |
| 1  | -3.589568000 | 1.457742000  | 1.635467000  |
| 1  | -2.128844000 | 1.230175000  | 2.608433000  |
| 6  | 0.048051000  | 2.686026000  | 0.469207000  |
| 1  | 0.587033000  | 2.450939000  | 1.388371000  |
| 1  | 0.730753000  | 2.525959000  | -0.369397000 |
| 1  | -0.193226000 | 3.752131000  | 0.499955000  |
| 6  | -2.458821000 | 2.611441000  | -1.137869000 |
| 1  | -3.418644000 | 2.157507000  | -1.385936000 |
| 1  | -2.649195000 | 3.638888000  | -0.814429000 |
| 1  | -1.857053000 | 2.660348000  | -2.048033000 |
| 6  | 2.833060000  | -0.300661000 | -0.327295000 |
| 6  | 3.503438000  | -1.057238000 | 0.636350000  |
| 6  | 3.575305000  | 0.591948000  | -1.102943000 |
| 6  | 4.866923000  | -0.925092000 | 0.814027000  |
| 1  | 2.945639000  | -1.769461000 | 1.235740000  |
| 6  | 4.942446000  | 0.707504000  | -0.926172000 |
| 1  | 3.071510000  | 1.214747000  | -1.833847000 |
| 6  | 5.599889000  | -0.045717000 | 0.031993000  |
| 1  | 5.364987000  | -1.527237000 | 1.565693000  |
| 1  | 5.497859000  | 1.407940000  | -1.539994000 |
| 1  | 6.669957000  | 0.051220000  | 0.169018000  |
| 1  | 0.135779000  | -2.265039000 | 0.953487000  |
| 7  | 0.514772000  | -0.200190000 | 2.301451000  |
| 1  | 0.714646000  | 0.761333000  | 2.520028000  |
| 1  | 0.819063000  | -0.821769000 | 3.032180000  |

**3SiP<sup>N-H</sup>** (T.E.= -1687.213007)

|    |              |              |              |
|----|--------------|--------------|--------------|
| 6  | -0.717535000 | 0.978083000  | -1.064563000 |
| 6  | -1.404509000 | -0.040507000 | -0.089328000 |
| 1  | -0.819143000 | 0.642697000  | -2.106785000 |
| 1  | -1.218835000 | 1.952469000  | -1.038802000 |
| 14 | 0.007779000  | -1.116975000 | 0.488941000  |
| 7  | 1.311131000  | -0.054358000 | 0.008698000  |
| 5  | 0.833466000  | 1.088571000  | -0.729776000 |
| 7  | 1.614342000  | 2.208664000  | -1.098606000 |
| 6  | 1.138503000  | 3.213021000  | -2.018780000 |
| 1  | 1.024981000  | 4.187845000  | -1.526452000 |
| 1  | 1.848208000  | 3.348566000  | -2.844478000 |
| 1  | 0.178653000  | 2.933055000  | -2.449375000 |
| 6  | 2.924505000  | 2.533360000  | -0.585945000 |
| 1  | 2.941157000  | 3.576658000  | -0.248802000 |
| 1  | 3.189556000  | 1.906409000  | 0.263417000  |
| 1  | 3.706578000  | 2.422917000  | -1.348919000 |
| 14 | -2.758018000 | -1.015413000 | -0.957381000 |
| 14 | -1.990408000 | 0.937960000  | 1.418668000  |
| 6  | -2.129712000 | -1.635408000 | -2.618393000 |
| 1  | -1.152090000 | -2.116713000 | -2.555972000 |
| 1  | -2.835960000 | -2.371404000 | -3.012640000 |
| 1  | -2.061856000 | -0.826391000 | -3.349508000 |
| 6  | -4.244896000 | 0.060682000  | -1.349056000 |
| 1  | -4.889432000 | -0.453964000 | -2.067020000 |
| 1  | -4.842237000 | 0.274448000  | -0.459556000 |
| 1  | -3.941102000 | 1.012783000  | -1.792318000 |
| 6  | -3.108065000 | 2.376946000  | 0.964411000  |
| 1  | -4.054645000 | 2.065491000  | 0.521449000  |
| 1  | -3.333883000 | 2.925899000  | 1.883673000  |
| 1  | -2.626099000 | 3.078189000  | 0.279758000  |
| 6  | -2.927564000 | -0.137210000 | 2.634852000  |
| 1  | -3.032162000 | 0.396571000  | 3.583322000  |
| 1  | -3.934216000 | -0.359666000 | 2.271849000  |
| 1  | -2.422444000 | -1.084605000 | 2.835712000  |
| 6  | -3.356838000 | -2.484997000 | 0.038938000  |
| 1  | -3.882042000 | -2.182204000 | 0.946401000  |
| 1  | -4.055596000 | -3.067387000 | -0.568364000 |
| 1  | -2.530314000 | -3.140169000 | 0.321059000  |
| 6  | -0.531595000 | 1.727928000  | 2.305015000  |

|   |              |              |              |
|---|--------------|--------------|--------------|
| 1 | 0.206391000  | 1.005524000  | 2.659462000  |
| 1 | -0.015774000 | 2.446205000  | 1.660952000  |
| 1 | -0.907628000 | 2.277479000  | 3.172932000  |
| 6 | 2.647011000  | -0.472800000 | 0.167755000  |
| 6 | 3.451745000  | -0.709502000 | -0.943790000 |
| 6 | 3.180085000  | -0.687190000 | 1.435527000  |
| 6 | 4.764100000  | -1.117506000 | -0.789265000 |
| 1 | 3.030477000  | -0.557403000 | -1.932634000 |
| 6 | 4.492019000  | -1.103442000 | 1.587291000  |
| 1 | 2.558203000  | -0.502682000 | 2.305292000  |
| 6 | 5.292493000  | -1.314698000 | 0.477084000  |
| 1 | 5.378308000  | -1.289668000 | -1.665931000 |
| 1 | 4.892953000  | -1.256423000 | 2.582943000  |
| 1 | 6.320407000  | -1.635847000 | 0.596726000  |
| 1 | 0.000206000  | -1.378547000 | 1.950306000  |
| 7 | 0.176800000  | -2.694131000 | -0.159424000 |
| 1 | 0.427531000  | -2.860228000 | -1.121165000 |
| 1 | 0.519194000  | -3.432531000 | 0.433977000  |

**4SiP<sup>N-H</sup>** (T.E. = -1897.121360)

|    |              |              |              |
|----|--------------|--------------|--------------|
| 6  | -0.916608000 | 0.245561000  | 1.566556000  |
| 6  | -1.368335000 | 0.046175000  | 0.072294000  |
| 1  | -1.345886000 | 1.156158000  | 2.001314000  |
| 1  | -1.291119000 | -0.561605000 | 2.206875000  |
| 14 | 0.145952000  | -0.049522000 | -1.043178000 |
| 7  | 1.425400000  | -0.006220000 | 0.119871000  |
| 14 | -2.313489000 | 1.584911000  | -0.473040000 |
| 14 | -2.372152000 | -1.548426000 | 0.023500000  |
| 6  | -1.252898000 | 3.102247000  | -0.140703000 |
| 1  | -0.276230000 | 3.054263000  | -0.629266000 |
| 1  | -1.769625000 | 3.988654000  | -0.519259000 |
| 1  | -1.088860000 | 3.255009000  | 0.929120000  |
| 6  | -3.902652000 | 1.825870000  | 0.496006000  |
| 1  | -4.271239000 | 2.842183000  | 0.331151000  |
| 1  | -4.683174000 | 1.135296000  | 0.169060000  |
| 1  | -3.762523000 | 1.693297000  | 1.571542000  |
| 6  | -3.166131000 | -1.909472000 | -1.633580000 |
| 1  | -2.473582000 | -1.784970000 | -2.466688000 |
| 1  | -3.534710000 | -2.939061000 | -1.640061000 |
| 1  | -4.026347000 | -1.255323000 | -1.797971000 |

|    |              |              |              |
|----|--------------|--------------|--------------|
| 6  | -1.263035000 | -2.980633000 | 0.544690000  |
| 1  | -1.819491000 | -3.918363000 | 0.459609000  |
| 1  | -0.343148000 | -3.088125000 | -0.034555000 |
| 1  | -0.973806000 | -2.873658000 | 1.594139000  |
| 6  | -2.768770000 | 1.548658000  | -2.291950000 |
| 1  | -3.590400000 | 0.856114000  | -2.483962000 |
| 1  | -3.100995000 | 2.545388000  | -2.595599000 |
| 1  | -1.934206000 | 1.266050000  | -2.936606000 |
| 6  | -3.770620000 | -1.545406000 | 1.279006000  |
| 1  | -3.452106000 | -1.262453000 | 2.284340000  |
| 1  | -4.587107000 | -0.883338000 | 0.985300000  |
| 1  | -4.174243000 | -2.560874000 | 1.336948000  |
| 14 | 0.958246000  | 0.290552000  | 1.760462000  |
| 6  | 1.598800000  | -1.043499000 | 2.898531000  |
| 1  | 1.269948000  | -2.031069000 | 2.565070000  |
| 1  | 2.691700000  | -1.042249000 | 2.921024000  |
| 1  | 1.246102000  | -0.892547000 | 3.921781000  |
| 6  | 1.586960000  | 1.942603000  | 2.359910000  |
| 1  | 1.237552000  | 2.750573000  | 1.712026000  |
| 1  | 1.241324000  | 2.147492000  | 3.376378000  |
| 1  | 2.679757000  | 1.965429000  | 2.370398000  |
| 6  | 2.776920000  | -0.037333000 | -0.289230000 |
| 6  | 3.496836000  | -1.228132000 | -0.260859000 |
| 6  | 3.410778000  | 1.120680000  | -0.732508000 |
| 6  | 4.822784000  | -1.258143000 | -0.657567000 |
| 1  | 2.993319000  | -2.128592000 | 0.078328000  |
| 6  | 4.735904000  | 1.087926000  | -1.131113000 |
| 1  | 2.843116000  | 2.046465000  | -0.755370000 |
| 6  | 5.447370000  | -0.100417000 | -1.093366000 |
| 1  | 5.371145000  | -2.192980000 | -0.628765000 |
| 1  | 5.216442000  | 1.997960000  | -1.472386000 |
| 1  | 6.485008000  | -0.124430000 | -1.404567000 |
| 1  | 0.283605000  | 1.105334000  | -1.967292000 |
| 7  | 0.203749000  | -1.353454000 | -2.151186000 |
| 1  | 0.647523000  | -1.209675000 | -3.043881000 |
| 1  | 0.224595000  | -2.323947000 | -1.884096000 |

**5SiP<sup>N-H</sup>** (T.E.= -1641.178299)

|   |             |              |             |
|---|-------------|--------------|-------------|
| 6 | 0.591713000 | -0.076399000 | 1.583613000 |
| 6 | 1.220482000 | -0.005512000 | 0.167092000 |

|    |              |              |              |
|----|--------------|--------------|--------------|
| 1  | 0.799598000  | -1.030522000 | 2.084725000  |
| 1  | 0.983944000  | 0.681333000  | 2.270614000  |
| 14 | -0.253008000 | -0.079025000 | -0.972269000 |
| 7  | -1.444755000 | 0.008051000  | 0.323868000  |
| 14 | 2.397973000  | -1.464850000 | -0.032304000 |
| 14 | 1.990481000  | 1.710669000  | -0.063195000 |
| 6  | 1.423002000  | -3.076669000 | 0.067056000  |
| 1  | 0.470774000  | -2.972422000 | 0.594929000  |
| 1  | 1.217474000  | -3.466299000 | -0.932305000 |
| 1  | 2.004090000  | -3.834991000 | 0.596861000  |
| 6  | 3.644006000  | -1.508893000 | 1.369860000  |
| 1  | 4.166405000  | -2.469179000 | 1.341030000  |
| 1  | 4.395288000  | -0.722038000 | 1.289513000  |
| 1  | 3.172590000  | -1.424141000 | 2.352048000  |
| 6  | 3.441909000  | 1.970702000  | 1.092091000  |
| 1  | 4.324925000  | 1.426920000  | 0.749121000  |
| 1  | 3.696397000  | 3.033725000  | 1.113814000  |
| 1  | 3.229908000  | 1.658562000  | 2.117310000  |
| 6  | 2.590877000  | 1.993408000  | -1.814575000 |
| 1  | 2.845478000  | 3.049873000  | -1.935399000 |
| 1  | 3.486505000  | 1.409992000  | -2.033944000 |
| 1  | 1.836324000  | 1.747897000  | -2.564867000 |
| 6  | 3.334379000  | -1.416158000 | -1.649856000 |
| 1  | 4.118015000  | -0.655152000 | -1.638308000 |
| 1  | 3.816777000  | -2.382045000 | -1.821443000 |
| 1  | 2.673058000  | -1.216045000 | -2.496087000 |
| 6  | 0.693797000  | 3.005459000  | 0.344003000  |
| 1  | -0.143440000 | 2.988445000  | -0.358069000 |
| 1  | 0.288477000  | 2.889288000  | 1.352350000  |
| 1  | 1.150800000  | 3.997107000  | 0.287354000  |
| 6  | -2.845544000 | 0.016467000  | 0.109246000  |
| 6  | -3.656933000 | -0.956816000 | 0.677342000  |
| 6  | -3.405250000 | 0.982997000  | -0.714658000 |
| 6  | -5.015777000 | -0.957195000 | 0.422130000  |
| 1  | -3.214338000 | -1.709038000 | 1.319457000  |
| 6  | -4.765217000 | 0.972520000  | -0.974724000 |
| 1  | -2.766002000 | 1.748882000  | -1.142095000 |
| 6  | -5.574229000 | 0.003766000  | -0.406402000 |
| 1  | -5.643985000 | -1.717868000 | 0.870904000  |
| 1  | -5.193818000 | 1.730728000  | -1.619777000 |

|   |              |              |              |
|---|--------------|--------------|--------------|
| 1 | -6.639047000 | -0.002895000 | -0.607001000 |
| 6 | -0.918066000 | 0.050880000  | 1.594116000  |
| 8 | -1.557909000 | 0.156741000  | 2.614400000  |
| 1 | -0.415905000 | 1.077738000  | -1.877146000 |
| 7 | -0.447322000 | -1.405423000 | -2.018548000 |
| 1 | -0.899934000 | -1.275529000 | -2.908603000 |
| 1 | -0.503704000 | -2.361109000 | -1.706688000 |

**8SiP<sup>N-H</sup>** (T.E.= -1209.788604)

|    |              |              |              |
|----|--------------|--------------|--------------|
| 6  | -0.496679000 | -1.726241000 | 0.098518000  |
| 6  | 0.969864000  | -1.715548000 | -0.314118000 |
| 6  | 1.500671000  | -0.314380000 | -0.068923000 |
| 1  | -1.035084000 | -2.543159000 | -0.395969000 |
| 1  | -0.575121000 | -1.897739000 | 1.184538000  |
| 1  | 1.041945000  | -2.012174000 | -1.371706000 |
| 1  | 1.506833000  | -2.484675000 | 0.256804000  |
| 14 | 0.143668000  | 0.839159000  | -0.248352000 |
| 7  | -1.078141000 | -0.442242000 | -0.264064000 |
| 15 | 3.139918000  | -0.008078000 | -0.001166000 |
| 6  | 4.005430000  | -0.817428000 | 1.370044000  |
| 1  | 3.825182000  | -1.892995000 | 1.318243000  |
| 1  | 5.081708000  | -0.638044000 | 1.327884000  |
| 1  | 3.604553000  | -0.444783000 | 2.313211000  |
| 6  | 4.108386000  | -0.564196000 | -1.432427000 |
| 1  | 3.762442000  | -0.042685000 | -2.325754000 |
| 1  | 5.176608000  | -0.386717000 | -1.292207000 |
| 1  | 3.943933000  | -1.634960000 | -1.573023000 |
| 6  | 3.502038000  | 1.744803000  | 0.164177000  |
| 1  | 3.080797000  | 2.288551000  | -0.682610000 |
| 1  | 3.058780000  | 2.131246000  | 1.081599000  |
| 1  | 4.582632000  | 1.894668000  | 0.186760000  |
| 6  | -2.440241000 | -0.257870000 | -0.153811000 |
| 6  | -3.297984000 | -1.234978000 | 0.368669000  |
| 6  | -3.022377000 | 0.950437000  | -0.571751000 |
| 6  | -4.660376000 | -1.006386000 | 0.468406000  |
| 1  | -2.897492000 | -2.181076000 | 0.709812000  |
| 6  | -4.379722000 | 1.166502000  | -0.464326000 |
| 1  | -2.391297000 | 1.717455000  | -1.008727000 |
| 6  | -5.218152000 | 0.191462000  | 0.059234000  |
| 1  | -5.293818000 | -1.785078000 | 0.880116000  |

|   |              |             |              |
|---|--------------|-------------|--------------|
| 1 | -4.792043000 | 2.111120000 | -0.802899000 |
| 1 | -6.284566000 | 0.363426000 | 0.140236000  |
| 1 | -0.011757000 | 1.662963000 | -1.478027000 |
| 7 | 0.023181000  | 2.026923000 | 0.987198000  |
| 1 | -0.586322000 | 2.821797000 | 0.869317000  |
| 1 | 0.051538000  | 1.735980000 | 1.952741000  |

**9SiP<sup>N-H</sup>** (T.E.= -1208.600264)

|    |              |              |              |
|----|--------------|--------------|--------------|
| 6  | 0.475033000  | -1.596093000 | 0.570583000  |
| 6  | -0.860481000 | -1.625629000 | 0.421595000  |
| 6  | -1.468150000 | -0.403001000 | -0.083579000 |
| 14 | -0.145017000 | 0.819759000  | -0.214270000 |
| 7  | 1.091546000  | -0.372319000 | 0.242785000  |
| 15 | -3.121665000 | -0.128805000 | -0.154665000 |
| 6  | -4.046124000 | -1.471357000 | -0.930864000 |
| 1  | -3.840943000 | -2.399643000 | -0.394291000 |
| 1  | -5.119763000 | -1.276992000 | -0.906293000 |
| 1  | -3.712936000 | -1.587322000 | -1.962247000 |
| 6  | -3.484540000 | 1.368452000  | -1.079204000 |
| 1  | -4.556773000 | 1.569439000  | -1.070860000 |
| 1  | -2.955041000 | 2.203721000  | -0.616194000 |
| 1  | -3.139352000 | 1.256136000  | -2.107393000 |
| 6  | -3.970820000 | 0.091964000  | 1.432830000  |
| 1  | -3.555622000 | 0.970639000  | 1.929784000  |
| 1  | -5.048695000 | 0.215922000  | 1.307772000  |
| 1  | -3.777757000 | -0.781956000 | 2.058014000  |
| 6  | 2.460071000  | -0.243122000 | 0.083964000  |
| 6  | 3.314611000  | -1.344808000 | -0.043633000 |
| 6  | 3.035535000  | 1.033241000  | 0.028925000  |
| 6  | 4.675467000  | -1.167915000 | -0.215251000 |
| 1  | 2.904417000  | -2.347007000 | -0.036269000 |
| 6  | 4.393613000  | 1.197749000  | -0.156378000 |
| 1  | 2.402058000  | 1.904898000  | 0.155345000  |
| 6  | 5.231321000  | 0.099448000  | -0.276734000 |
| 1  | 5.310300000  | -2.041867000 | -0.314812000 |
| 1  | 4.804794000  | 2.200726000  | -0.195159000 |
| 1  | 6.297965000  | 0.229491000  | -0.413588000 |
| 1  | 1.074627000  | -2.397493000 | 0.978953000  |
| 1  | -1.435722000 | -2.504228000 | 0.698234000  |
| 1  | 0.256070000  | 1.413852000  | -1.514537000 |



|   |              |             |             |
|---|--------------|-------------|-------------|
| 7 | -0.392373000 | 2.227021000 | 0.745557000 |
| 1 | 0.129682000  | 3.071505000 | 0.564430000 |
| 1 | -0.609523000 | 2.139128000 | 1.726933000 |

**14SiP<sup>N-H</sup>** (T.E.= -1403.959159)

|    |              |              |              |
|----|--------------|--------------|--------------|
| 6  | 1.191949000  | 1.176415000  | 0.086232000  |
| 6  | 1.650449000  | -0.168035000 | -0.099187000 |
| 7  | -0.979442000 | -0.067620000 | -0.269821000 |
| 6  | -2.315511000 | -0.462262000 | -0.091256000 |
| 6  | -3.035383000 | -0.058902000 | 1.033172000  |
| 6  | -4.343645000 | -0.464788000 | 1.218544000  |
| 6  | -4.957909000 | -1.301895000 | 0.299208000  |
| 6  | -4.244937000 | -1.725984000 | -0.809197000 |
| 6  | -2.938688000 | -1.309781000 | -1.005652000 |
| 1  | -2.549288000 | 0.583918000  | 1.759821000  |
| 1  | -4.886584000 | -0.132300000 | 2.096353000  |
| 1  | -5.982364000 | -1.621798000 | 0.447960000  |
| 1  | -4.711538000 | -2.380549000 | -1.536990000 |
| 1  | -2.389551000 | -1.623948000 | -1.887346000 |
| 5  | -0.417486000 | 1.256739000  | -0.112181000 |
| 7  | -1.135485000 | 2.464542000  | -0.208160000 |
| 6  | -0.580486000 | 3.746103000  | 0.172831000  |
| 1  | -0.583327000 | 4.437767000  | -0.678758000 |
| 1  | -1.188265000 | 4.203071000  | 0.964444000  |
| 1  | 0.442187000  | 3.624805000  | 0.522981000  |
| 6  | -2.489118000 | 2.592483000  | -0.693028000 |
| 1  | -3.192985000 | 2.836902000  | 0.113887000  |
| 1  | -2.540346000 | 3.403812000  | -1.428169000 |
| 1  | -2.832977000 | 1.679723000  | -1.175455000 |
| 15 | 3.325859000  | -0.457293000 | -0.001370000 |
| 6  | 4.034867000  | -0.130263000 | 1.622059000  |
| 1  | 5.113581000  | -0.297699000 | 1.614746000  |
| 1  | 3.823367000  | 0.905977000  | 1.885775000  |
| 1  | 3.565887000  | -0.788427000 | 2.354466000  |
| 6  | 4.306484000  | 0.521183000  | -1.150666000 |
| 1  | 5.371505000  | 0.329852000  | -1.006841000 |
| 1  | 4.022026000  | 0.265966000  | -2.171909000 |
| 1  | 4.085493000  | 1.573116000  | -0.969300000 |
| 6  | 3.689946000  | -2.178319000 | -0.366885000 |
| 1  | 3.157161000  | -2.822541000 | 0.334099000  |

|    |              |              |              |
|----|--------------|--------------|--------------|
| 1  | 3.355098000  | -2.412214000 | -1.378836000 |
| 1  | 4.763121000  | -2.359842000 | -0.290415000 |
| 8  | 1.951764000  | 2.131071000  | 0.336910000  |
| 14 | 0.273492000  | -1.299273000 | -0.384383000 |
| 1  | 0.203244000  | -1.998714000 | -1.692443000 |
| 7  | 0.148215000  | -2.589249000 | 0.740807000  |
| 1  | -0.443346000 | -3.377420000 | 0.524719000  |
| 1  | 0.113322000  | -2.381948000 | 1.727922000  |

**1GeP<sup>N-H</sup>** (T.E.= -3354.538974)

|    |              |              |              |
|----|--------------|--------------|--------------|
| 6  | -0.877662000 | 0.532786000  | 1.683984000  |
| 6  | 0.604647000  | 0.188049000  | 1.736172000  |
| 6  | 1.219596000  | 0.106857000  | 0.312574000  |
| 1  | -1.349196000 | 0.285093000  | 2.643245000  |
| 1  | -1.016603000 | 1.616237000  | 1.542210000  |
| 1  | 0.706283000  | -0.780251000 | 2.241382000  |
| 1  | 1.134274000  | 0.915109000  | 2.361498000  |
| 32 | -0.202476000 | -0.882698000 | -0.581084000 |
| 7  | -1.487712000 | -0.218193000 | 0.607358000  |
| 14 | 1.324522000  | 1.824142000  | -0.493672000 |
| 14 | 2.861181000  | -0.829038000 | 0.336831000  |
| 6  | 2.791371000  | -2.257063000 | 1.549225000  |
| 1  | 1.979265000  | -2.949190000 | 1.319459000  |
| 1  | 3.730406000  | -2.813247000 | 1.477250000  |
| 1  | 2.685795000  | -1.923918000 | 2.584049000  |
| 6  | 3.277895000  | -1.545430000 | -1.341311000 |
| 1  | 3.370794000  | -0.793460000 | -2.125360000 |
| 1  | 4.230910000  | -2.077907000 | -1.277944000 |
| 1  | 2.514477000  | -2.268345000 | -1.640714000 |
| 6  | 4.258157000  | 0.275382000  | 0.930752000  |
| 1  | 4.019533000  | 0.710837000  | 1.905383000  |
| 1  | 5.163604000  | -0.325513000 | 1.052243000  |
| 1  | 4.491110000  | 1.090743000  | 0.243216000  |
| 6  | 2.405647000  | 1.800173000  | -2.023751000 |
| 1  | 2.027185000  | 1.085455000  | -2.759815000 |
| 1  | 2.370278000  | 2.791936000  | -2.483271000 |
| 1  | 3.452359000  | 1.564213000  | -1.824589000 |
| 6  | -0.332578000 | 2.485581000  | -1.089996000 |
| 1  | -1.070087000 | 2.611830000  | -0.295242000 |
| 1  | -0.152362000 | 3.471629000  | -1.529600000 |

|   |              |              |              |
|---|--------------|--------------|--------------|
| 1 | -0.782798000 | 1.864491000  | -1.868067000 |
| 6 | 1.993161000  | 3.075732000  | 0.731006000  |
| 1 | 1.304112000  | 3.238822000  | 1.563288000  |
| 1 | 2.961666000  | 2.791418000  | 1.145514000  |
| 1 | 2.116593000  | 4.034801000  | 0.220191000  |
| 6 | -2.838630000 | -0.107739000 | 0.364438000  |
| 6 | -3.432175000 | -0.828055000 | -0.683340000 |
| 6 | -3.672451000 | 0.709476000  | 1.138866000  |
| 6 | -4.783077000 | -0.731664000 | -0.942059000 |
| 1 | -2.818749000 | -1.484342000 | -1.293239000 |
| 6 | -5.028287000 | 0.794470000  | 0.870183000  |
| 1 | -3.258560000 | 1.284422000  | 1.957501000  |
| 6 | -5.599379000 | 0.081288000  | -0.168311000 |
| 1 | -5.206396000 | -1.304839000 | -1.759653000 |
| 1 | -5.645729000 | 1.436298000  | 1.489465000  |
| 1 | -6.660673000 | 0.152926000  | -0.371926000 |
| 1 | -0.506088000 | -0.555002000 | -2.056728000 |
| 7 | -0.070003000 | -2.716112000 | -0.505987000 |
| 1 | -0.641887000 | -3.189211000 | -1.193371000 |
| 1 | -0.283537000 | -3.105055000 | 0.403898000  |

**2GeP<sup>N-H</sup>** (T.E.= -3353.346546)

|    |              |              |              |
|----|--------------|--------------|--------------|
| 6  | -1.235213000 | 0.029366000  | -0.347424000 |
| 6  | -0.538196000 | 0.192528000  | -1.677514000 |
| 6  | 0.789833000  | 0.033268000  | -1.737515000 |
| 1  | -1.103429000 | 0.445300000  | -2.568409000 |
| 1  | 1.358331000  | 0.155321000  | -2.653161000 |
| 32 | 0.196985000  | -0.794749000 | 0.714953000  |
| 7  | 1.474483000  | -0.361990000 | -0.597561000 |
| 14 | -2.690725000 | -1.163336000 | -0.442142000 |
| 14 | -1.588108000 | 1.784812000  | 0.266915000  |
| 6  | -3.201724000 | -1.706274000 | 1.278341000  |
| 1  | -4.016139000 | -2.431977000 | 1.205729000  |
| 1  | -2.383136000 | -2.191038000 | 1.817628000  |
| 1  | -3.555073000 | -0.870684000 | 1.885585000  |
| 6  | -2.580882000 | 2.747751000  | -0.995797000 |
| 1  | -3.590627000 | 2.358427000  | -1.129583000 |
| 1  | -2.664524000 | 3.785067000  | -0.659484000 |
| 1  | -2.085164000 | 2.756964000  | -1.969049000 |
| 6  | -2.538695000 | 1.783971000  | 1.883973000  |

|   |              |              |              |
|---|--------------|--------------|--------------|
| 1 | -2.092174000 | 1.133041000  | 2.639266000  |
| 1 | -2.570956000 | 2.798004000  | 2.291398000  |
| 1 | -3.571821000 | 1.460412000  | 1.733084000  |
| 6 | 0.019304000  | 2.734674000  | 0.465929000  |
| 1 | 0.762370000  | 2.275924000  | 1.120898000  |
| 1 | 0.489997000  | 2.865198000  | -0.511713000 |
| 1 | -0.204023000 | 3.729957000  | 0.860358000  |
| 6 | -4.170543000 | -0.402478000 | -1.300983000 |
| 1 | -4.927831000 | -1.172142000 | -1.472218000 |
| 1 | -4.629988000 | 0.389945000  | -0.705876000 |
| 1 | -3.898326000 | 0.018893000  | -2.272151000 |
| 6 | -2.162313000 | -2.664771000 | -1.427710000 |
| 1 | -2.958131000 | -3.414022000 | -1.434550000 |
| 1 | -1.947571000 | -2.392424000 | -2.463603000 |
| 1 | -1.264788000 | -3.133577000 | -1.016156000 |
| 6 | 2.844464000  | -0.205975000 | -0.444873000 |
| 6 | 3.531577000  | -0.966926000 | 0.504587000  |
| 6 | 3.573400000  | 0.706315000  | -1.212416000 |
| 6 | 4.894967000  | -0.827448000 | 0.669269000  |
| 1 | 2.984132000  | -1.681495000 | 1.110444000  |
| 6 | 4.941652000  | 0.829143000  | -1.047643000 |
| 1 | 3.059703000  | 1.337985000  | -1.928175000 |
| 6 | 5.615269000  | 0.066918000  | -0.108648000 |
| 1 | 5.403529000  | -1.432710000 | 1.411397000  |
| 1 | 5.484497000  | 1.544252000  | -1.656007000 |
| 1 | 6.685710000  | 0.170769000  | 0.020099000  |
| 1 | 0.146638000  | -2.327238000 | 0.920646000  |
| 7 | 0.676395000  | -0.149378000 | 2.350300000  |
| 1 | 0.445966000  | 0.801143000  | 2.595073000  |
| 1 | 0.489414000  | -0.768774000 | 3.124577000  |

**3GeP<sup>N-H</sup>** (T.E.= -3474.641981)

|   |              |             |              |
|---|--------------|-------------|--------------|
| 6 | 0.694019000  | 1.321035000 | -0.824931000 |
| 6 | 1.438249000  | 0.099967000 | -0.189553000 |
| 1 | 1.191738000  | 2.256711000 | -0.546882000 |
| 1 | 0.765949000  | 1.285764000 | -1.921910000 |
| 7 | -1.374297000 | 0.045302000 | -0.096148000 |
| 5 | -0.857452000 | 1.336936000 | -0.448604000 |
| 7 | -1.609390000 | 2.538994000 | -0.442928000 |
| 6 | -1.122418000 | 3.771453000 | -1.011623000 |

|    |              |              |              |
|----|--------------|--------------|--------------|
| 1  | -1.843269000 | 4.176961000  | -1.733021000 |
| 1  | -0.970306000 | 4.539326000  | -0.240985000 |
| 1  | -0.180246000 | 3.622547000  | -1.536458000 |
| 6  | -2.903298000 | 2.709320000  | 0.172670000  |
| 1  | -3.700836000 | 2.855942000  | -0.568223000 |
| 1  | -3.166952000 | 1.850808000  | 0.787809000  |
| 1  | -2.891667000 | 3.594496000  | 0.820382000  |
| 14 | 2.017571000  | 0.619619000  | 1.529707000  |
| 14 | 2.771280000  | -0.582956000 | -1.328634000 |
| 6  | 0.552601000  | 1.094847000  | 2.612460000  |
| 1  | -0.201948000 | 0.313657000  | 2.727276000  |
| 1  | 0.923314000  | 1.355953000  | 3.607895000  |
| 1  | 0.042535000  | 1.976073000  | 2.211446000  |
| 6  | 3.083705000  | 2.163526000  | 1.473320000  |
| 1  | 3.341849000  | 2.430175000  | 2.502621000  |
| 1  | 4.014621000  | 2.018104000  | 0.924180000  |
| 1  | 2.560757000  | 3.018108000  | 1.038681000  |
| 6  | 4.262432000  | 0.548425000  | -1.422168000 |
| 1  | 4.907590000  | 0.241711000  | -2.249813000 |
| 1  | 3.959599000  | 1.584078000  | -1.599497000 |
| 1  | 4.859213000  | 0.520901000  | -0.507552000 |
| 6  | 3.326576000  | -2.291742000 | -0.795349000 |
| 1  | 4.059206000  | -2.670761000 | -1.513404000 |
| 1  | 3.792978000  | -2.296050000 | 0.191057000  |
| 1  | 2.494068000  | -3.000213000 | -0.771745000 |
| 6  | 3.013650000  | -0.713460000 | 2.388360000  |
| 1  | 4.000867000  | -0.820237000 | 1.931481000  |
| 1  | 3.166385000  | -0.432279000 | 3.434029000  |
| 1  | 2.518507000  | -1.686711000 | 2.360921000  |
| 6  | 2.085150000  | -0.738065000 | -3.070406000 |
| 1  | 1.118131000  | -1.247215000 | -3.092236000 |
| 1  | 1.966555000  | 0.232934000  | -3.556104000 |
| 1  | 2.781851000  | -1.323788000 | -3.676455000 |
| 32 | 0.007429000  | -1.217783000 | -0.032474000 |
| 6  | -2.707258000 | -0.392178000 | -0.089895000 |
| 6  | -3.525815000 | -0.209427000 | -1.203838000 |
| 6  | -3.238105000 | -1.042728000 | 1.023121000  |
| 6  | -4.838965000 | -0.642186000 | -1.194122000 |
| 1  | -3.112903000 | 0.287545000  | -2.075828000 |
| 6  | -4.549953000 | -1.485455000 | 1.025209000  |

|   |              |              |              |
|---|--------------|--------------|--------------|
| 1 | -2.608124000 | -1.174748000 | 1.896670000  |
| 6 | -5.359194000 | -1.283985000 | -0.080512000 |
| 1 | -5.460520000 | -0.484062000 | -2.068325000 |
| 1 | -4.945441000 | -1.983029000 | 1.903755000  |
| 1 | -6.387530000 | -1.625035000 | -0.075934000 |
| 1 | -0.206304000 | -2.225808000 | -1.188101000 |
| 7 | 0.061527000  | -2.295346000 | 1.452856000  |
| 1 | -0.000620000 | -1.837075000 | 2.351826000  |
| 1 | -0.596563000 | -3.062440000 | 1.426698000  |

**4GeP<sup>N-H</sup>** (T.E.= -3684.548930)

|    |              |              |              |
|----|--------------|--------------|--------------|
| 6  | 0.919969000  | 0.837467000  | 1.421254000  |
| 6  | 1.432125000  | 0.028471000  | 0.181763000  |
| 1  | 1.131322000  | 0.303249000  | 2.356220000  |
| 1  | 1.454486000  | 1.789035000  | 1.527338000  |
| 7  | -1.490258000 | 0.108128000  | 0.184904000  |
| 14 | 2.023535000  | -1.649827000 | 0.830903000  |
| 14 | 2.730613000  | 1.031850000  | -0.750981000 |
| 6  | 0.565610000  | -2.552346000 | 1.600155000  |
| 1  | -0.232949000 | -2.774294000 | 0.887906000  |
| 1  | 0.913712000  | -3.502824000 | 2.014083000  |
| 1  | 0.126996000  | -1.978529000 | 2.420785000  |
| 6  | 3.309275000  | -1.478579000 | 2.186014000  |
| 1  | 3.443429000  | -2.458128000 | 2.653881000  |
| 1  | 4.278379000  | -1.161483000 | 1.799360000  |
| 1  | 3.014540000  | -0.779133000 | 2.970861000  |
| 6  | 4.280503000  | 1.246654000  | 0.285272000  |
| 1  | 4.873434000  | 0.329966000  | 0.318655000  |
| 1  | 4.903754000  | 2.027944000  | -0.158015000 |
| 1  | 4.055305000  | 1.540947000  | 1.313358000  |
| 6  | 3.209612000  | 0.254019000  | -2.383777000 |
| 1  | 3.886003000  | 0.930237000  | -2.914205000 |
| 1  | 3.724991000  | -0.699970000 | -2.262511000 |
| 1  | 2.329650000  | 0.101171000  | -3.013003000 |
| 6  | 2.767486000  | -2.728388000 | -0.509411000 |
| 1  | 3.758347000  | -2.370226000 | -0.798857000 |
| 1  | 2.885688000  | -3.745563000 | -0.125908000 |
| 1  | 2.150945000  | -2.781051000 | -1.409522000 |
| 6  | 2.065646000  | 2.751566000  | -1.105903000 |
| 1  | 1.236418000  | 2.720094000  | -1.815283000 |

|    |              |              |              |
|----|--------------|--------------|--------------|
| 1  | 1.729954000  | 3.274171000  | -0.207099000 |
| 1  | 2.859745000  | 3.352672000  | -1.557516000 |
| 14 | -0.931751000 | 1.204170000  | 1.415533000  |
| 6  | -1.186347000 | 3.009185000  | 0.982203000  |
| 1  | -0.871590000 | 3.202946000  | -0.047360000 |
| 1  | -2.222280000 | 3.338530000  | 1.081914000  |
| 1  | -0.575064000 | 3.636997000  | 1.637091000  |
| 6  | -1.700203000 | 0.825041000  | 3.072036000  |
| 1  | -1.525202000 | -0.219062000 | 3.342407000  |
| 1  | -1.255106000 | 1.455130000  | 3.846393000  |
| 1  | -2.777767000 | 0.998952000  | 3.079911000  |
| 32 | -0.104145000 | -0.380149000 | -0.972628000 |
| 6  | -2.822423000 | -0.176119000 | -0.119269000 |
| 6  | -3.180189000 | -1.366536000 | -0.762122000 |
| 6  | -3.856035000 | 0.704330000  | 0.217672000  |
| 6  | -4.500111000 | -1.657268000 | -1.051740000 |
| 1  | -2.407606000 | -2.084697000 | -1.015843000 |
| 6  | -5.176119000 | 0.403036000  | -0.064095000 |
| 1  | -3.618713000 | 1.647930000  | 0.696776000  |
| 6  | -5.512602000 | -0.777869000 | -0.703985000 |
| 1  | -4.739150000 | -2.591932000 | -1.547272000 |
| 1  | -5.950413000 | 1.109725000  | 0.213633000  |
| 1  | -6.546640000 | -1.009655000 | -0.928159000 |
| 1  | -0.182703000 | -1.854380000 | -1.425791000 |
| 7  | -0.259359000 | 0.560343000  | -2.554303000 |
| 1  | -0.873706000 | 0.091098000  | -3.208543000 |
| 1  | -0.608982000 | 1.502925000  | -2.428582000 |

**5GeP<sup>N-H</sup>** (T.E.= -3428.608397)

|    |              |              |              |
|----|--------------|--------------|--------------|
| 6  | 0.663752000  | 0.317660000  | 1.701251000  |
| 6  | 1.294443000  | 0.043090000  | 0.313914000  |
| 1  | 0.869251000  | -0.497073000 | 2.407321000  |
| 1  | 1.060863000  | 1.218938000  | 2.177154000  |
| 7  | -1.429259000 | -0.192425000 | 0.630223000  |
| 14 | 2.813559000  | -1.077828000 | 0.407953000  |
| 14 | 1.560341000  | 1.703516000  | -0.562700000 |
| 6  | 2.472828000  | -2.475890000 | 1.611484000  |
| 1  | 1.522355000  | -2.978973000 | 1.415468000  |
| 1  | 3.266462000  | -3.222471000 | 1.520969000  |
| 1  | 2.466027000  | -2.133333000 | 2.648595000  |

|    |              |              |              |
|----|--------------|--------------|--------------|
| 6  | 4.332548000  | -0.173958000 | 1.022701000  |
| 1  | 5.117813000  | -0.899661000 | 1.250473000  |
| 1  | 4.730133000  | 0.525014000  | 0.283502000  |
| 1  | 4.118475000  | 0.384489000  | 1.938086000  |
| 6  | 2.659426000  | 2.835050000  | 0.449035000  |
| 1  | 3.681912000  | 2.468020000  | 0.541321000  |
| 1  | 2.698284000  | 3.804771000  | -0.055881000 |
| 1  | 2.267882000  | 3.011207000  | 1.453329000  |
| 6  | 2.339524000  | 1.488129000  | -2.249340000 |
| 1  | 2.312510000  | 2.443303000  | -2.780687000 |
| 1  | 3.388225000  | 1.190286000  | -2.169441000 |
| 1  | 1.819917000  | 0.743978000  | -2.856876000 |
| 6  | 3.171156000  | -1.827579000 | -1.270713000 |
| 1  | 3.376344000  | -1.072863000 | -2.032115000 |
| 1  | 4.049000000  | -2.474967000 | -1.195264000 |
| 1  | 2.342722000  | -2.444290000 | -1.629935000 |
| 6  | -0.066811000 | 2.628591000  | -0.720039000 |
| 1  | -0.861848000 | 2.099872000  | -1.250427000 |
| 1  | -0.452954000 | 2.890255000  | 0.269426000  |
| 1  | 0.118826000  | 3.566488000  | -1.251261000 |
| 6  | -2.812010000 | -0.165005000 | 0.362579000  |
| 6  | -3.434296000 | -1.319781000 | -0.100409000 |
| 6  | -3.557650000 | 1.003730000  | 0.486639000  |
| 6  | -4.776219000 | -1.308417000 | -0.437332000 |
| 1  | -2.859216000 | -2.237243000 | -0.182075000 |
| 6  | -4.900329000 | 1.005470000  | 0.154712000  |
| 1  | -3.079526000 | 1.905100000  | 0.846949000  |
| 6  | -5.516579000 | -0.145541000 | -0.309897000 |
| 1  | -5.245669000 | -2.217544000 | -0.795261000 |
| 1  | -5.470197000 | 1.922093000  | 0.255673000  |
| 1  | -6.567935000 | -0.135575000 | -0.571281000 |
| 6  | -0.853121000 | 0.461887000  | 1.685024000  |
| 8  | -1.446394000 | 1.062805000  | 2.554749000  |
| 32 | -0.151544000 | -0.944912000 | -0.542018000 |
| 1  | -0.155902000 | -2.481713000 | -0.409825000 |
| 7  | -0.500613000 | -0.617142000 | -2.299699000 |
| 1  | -0.768520000 | 0.325909000  | -2.544984000 |
| 1  | -1.150136000 | -1.266561000 | -2.721234000 |



**8GeP<sup>N-H</sup>** (T.E.= -2997.214068)

|    |              |              |              |
|----|--------------|--------------|--------------|
| 6  | -0.588366000 | 1.838530000  | 0.233667000  |
| 6  | 0.899397000  | 1.756345000  | 0.553248000  |
| 6  | 1.491167000  | 0.568410000  | -0.184756000 |
| 1  | -1.094756000 | 2.475315000  | 0.969055000  |
| 1  | -0.726341000 | 2.310826000  | -0.753292000 |
| 1  | 1.009985000  | 1.678107000  | 1.647826000  |
| 1  | 1.369761000  | 2.704373000  | 0.264171000  |
| 32 | 0.154098000  | -0.752390000 | -0.258296000 |
| 7  | -1.155104000 | 0.501742000  | 0.250025000  |
| 15 | 3.120081000  | 0.198643000  | -0.120408000 |
| 6  | 4.178222000  | 1.514120000  | -0.767573000 |
| 1  | 3.976158000  | 2.433291000  | -0.213778000 |
| 1  | 5.235209000  | 1.263661000  | -0.660824000 |
| 1  | 3.940650000  | 1.683648000  | -1.817922000 |
| 6  | 3.481827000  | -1.285189000 | -1.068878000 |
| 1  | 2.933771000  | -2.124078000 | -0.633679000 |
| 1  | 3.165378000  | -1.146417000 | -2.102946000 |
| 1  | 4.550608000  | -1.502086000 | -1.037595000 |
| 6  | 3.860024000  | -0.121539000 | 1.510823000  |
| 1  | 4.933619000  | -0.310107000 | 1.441805000  |
| 1  | 3.693783000  | 0.744963000  | 2.154369000  |
| 1  | 3.366028000  | -0.986392000 | 1.957516000  |
| 6  | -2.511197000 | 0.329552000  | 0.100662000  |
| 6  | -3.056545000 | -0.965013000 | 0.074880000  |
| 6  | -3.406827000 | 1.402217000  | -0.020018000 |
| 6  | -4.411449000 | -1.172519000 | -0.068939000 |
| 1  | -2.394508000 | -1.817685000 | 0.188348000  |
| 6  | -4.766943000 | 1.180031000  | -0.157369000 |
| 1  | -3.037941000 | 2.419816000  | -0.013832000 |
| 6  | -5.287007000 | -0.101541000 | -0.187178000 |
| 1  | -4.791715000 | -2.188355000 | -0.083982000 |
| 1  | -5.429749000 | 2.034138000  | -0.248847000 |
| 1  | -6.352006000 | -0.265674000 | -0.296882000 |
| 1  | -0.250962000 | -1.455356000 | -1.575927000 |
| 7  | 0.398722000  | -2.172359000 | 0.904647000  |
| 1  | 0.442237000  | -1.894831000 | 1.877384000  |
| 1  | -0.270702000 | -2.926417000 | 0.816507000  |

**9GeP<sup>N-H</sup>** (T.E.= -2996.026150)

|    |              |              |              |
|----|--------------|--------------|--------------|
| 6  | -0.490392000 | -1.687648000 | 0.559716000  |
| 6  | 0.849146000  | -1.704233000 | 0.434229000  |
| 6  | 1.497955000  | -0.487667000 | -0.028081000 |
| 7  | -1.144121000 | -0.485017000 | 0.266647000  |
| 15 | 3.155694000  | -0.265666000 | -0.116265000 |
| 6  | 4.052506000  | -0.330715000 | 1.458478000  |
| 1  | 3.832528000  | -1.284488000 | 1.942665000  |
| 1  | 5.131661000  | -0.239781000 | 1.319250000  |
| 1  | 3.693443000  | 0.472130000  | 2.104360000  |
| 6  | 3.548517000  | 1.338048000  | -0.826549000 |
| 1  | 4.629625000  | 1.471172000  | -0.883329000 |
| 1  | 3.122248000  | 1.408322000  | -1.828071000 |
| 1  | 3.124079000  | 2.125784000  | -0.202020000 |
| 6  | 4.025253000  | -1.498607000 | -1.113616000 |
| 1  | 3.659585000  | -1.454161000 | -2.139695000 |
| 1  | 5.104753000  | -1.336480000 | -1.094962000 |
| 1  | 3.809077000  | -2.491072000 | -0.713220000 |
| 32 | 0.133693000  | 0.811020000  | -0.215851000 |
| 6  | -2.509785000 | -0.372768000 | 0.104888000  |
| 6  | -3.098884000 | 0.898761000  | 0.057355000  |
| 6  | -3.351630000 | -1.484905000 | -0.027851000 |
| 6  | -4.458567000 | 1.046861000  | -0.126029000 |
| 1  | -2.472078000 | 1.773110000  | 0.201055000  |
| 6  | -4.714543000 | -1.321763000 | -0.198135000 |
| 1  | -2.930737000 | -2.482834000 | -0.023657000 |
| 6  | -5.284616000 | -0.060467000 | -0.253444000 |
| 1  | -4.881837000 | 2.045227000  | -0.156578000 |
| 1  | -5.339761000 | -2.202306000 | -0.301673000 |
| 1  | -6.352728000 | 0.058434000  | -0.389151000 |
| 1  | -1.071802000 | -2.517350000 | 0.938591000  |
| 1  | 1.411610000  | -2.593869000 | 0.702855000  |
| 1  | -0.259687000 | 1.441582000  | -1.574003000 |
| 7  | 0.123335000  | 2.265464000  | 0.915881000  |
| 1  | 0.693433000  | 2.198038000  | 1.746808000  |
| 1  | 0.238737000  | 3.168386000  | 0.478522000  |

**14GeP<sup>N-H</sup>** (T.E.= -3191.385349)

|   |             |              |              |
|---|-------------|--------------|--------------|
| 6 | 1.155991000 | 1.305623000  | 0.079237000  |
| 6 | 1.658694000 | -0.022326000 | -0.085511000 |

|    |              |              |              |
|----|--------------|--------------|--------------|
| 7  | -1.052072000 | 0.081158000  | -0.280993000 |
| 6  | -2.377741000 | -0.312890000 | -0.065524000 |
| 6  | -3.086164000 | 0.123171000  | 1.055658000  |
| 6  | -4.386320000 | -0.291217000 | 1.277672000  |
| 6  | -5.006649000 | -1.168711000 | 0.401172000  |
| 6  | -4.306905000 | -1.624438000 | -0.703446000 |
| 6  | -3.009688000 | -1.201033000 | -0.936770000 |
| 1  | -2.596065000 | 0.794228000  | 1.753463000  |
| 1  | -4.917370000 | 0.066066000  | 2.153096000  |
| 1  | -6.023899000 | -1.495725000 | 0.580283000  |
| 1  | -4.777305000 | -2.310665000 | -1.398933000 |
| 1  | -2.473746000 | -1.541343000 | -1.817456000 |
| 5  | -0.457042000 | 1.384859000  | -0.127100000 |
| 7  | -1.161209000 | 2.603439000  | -0.232964000 |
| 6  | -0.612648000 | 3.885833000  | 0.152096000  |
| 1  | -0.602899000 | 4.575280000  | -0.701477000 |
| 1  | -1.232908000 | 4.345411000  | 0.932752000  |
| 1  | 0.404349000  | 3.766714000  | 0.517955000  |
| 6  | -2.510518000 | 2.729195000  | -0.729241000 |
| 1  | -3.225172000 | 2.962093000  | 0.071803000  |
| 1  | -2.559048000 | 3.546692000  | -1.457849000 |
| 1  | -2.843965000 | 1.818633000  | -1.223508000 |
| 15 | 3.335010000  | -0.281873000 | 0.065986000  |
| 6  | 3.989767000  | 0.085341000  | 1.703028000  |
| 1  | 5.070310000  | -0.066912000 | 1.732279000  |
| 1  | 3.756051000  | 1.123362000  | 1.939192000  |
| 1  | 3.506349000  | -0.565610000 | 2.432385000  |
| 6  | 4.338720000  | 0.685000000  | -1.073204000 |
| 1  | 5.400774000  | 0.504091000  | -0.897105000 |
| 1  | 4.084211000  | 0.411513000  | -2.097570000 |
| 1  | 4.106353000  | 1.738126000  | -0.915469000 |
| 6  | 3.725152000  | -2.006295000 | -0.254428000 |
| 1  | 3.185157000  | -2.642346000 | 0.449013000  |
| 1  | 3.419221000  | -2.265592000 | -1.269432000 |
| 1  | 4.797935000  | -2.174668000 | -0.148409000 |
| 8  | 1.901456000  | 2.272544000  | 0.332068000  |
| 32 | 0.264481000  | -1.256087000 | -0.384759000 |
| 1  | 0.174771000  | -2.046496000 | -1.709783000 |
| 7  | 0.096441000  | -2.540354000 | 0.921775000  |
| 1  | -0.037341000 | -2.147456000 | 1.845559000  |

1 -0.643012000 -3.210365000 0.751494000

**IIa-P<sup>N-H</sup>** (T.E.= -1112.430200)

6 -0.012572000 2.466347000 -0.023110000  
6 -1.207327000 1.848427000 0.026511000  
1 -0.020696000 3.548606000 -0.054461000  
14 0.026432000 -0.600327000 0.275244000  
6 2.406521000 2.635621000 -0.096794000  
6 1.305732000 1.864043000 -0.029813000  
1 3.408826000 2.231062000 -0.096226000  
1 2.295762000 3.709542000 -0.155569000  
6 -2.623352000 -0.154936000 0.068527000  
6 -3.312392000 -0.283074000 -1.131663000  
6 -3.171145000 -0.685733000 1.228090000  
6 -4.542317000 -0.914002000 -1.165397000  
1 -2.865541000 0.114741000 -2.037200000  
6 -4.398604000 -1.327749000 1.190733000  
1 -2.625369000 -0.584294000 2.160216000  
6 -5.088081000 -1.439714000 -0.004040000  
1 -5.073831000 -1.006192000 -2.105565000  
1 -4.818361000 -1.737669000 2.102075000  
1 -6.049249000 -1.939227000 -0.033105000  
7 -1.340222000 0.462264000 0.105572000  
6 2.651713000 -0.149311000 0.029163000  
6 3.286861000 -0.441840000 1.227006000  
6 3.273115000 -0.460110000 -1.172499000  
6 4.535334000 -1.043404000 1.223664000  
1 2.792940000 -0.184539000 2.158351000  
6 4.521347000 -1.056402000 -1.174798000  
1 2.763489000 -0.221756000 -2.100321000  
6 5.154707000 -1.348386000 0.023708000  
1 5.026160000 -1.271087000 2.162862000  
1 5.002348000 -1.296644000 -2.115994000  
1 6.132295000 -1.816201000 0.020732000  
7 1.364843000 0.464085000 0.032596000  
6 -2.465785000 2.649202000 0.037195000  
1 -3.083964000 2.448840000 -0.841122000  
1 -3.077531000 2.409614000 0.911598000  
1 -2.233213000 3.712170000 0.055973000  
1 0.047463000 -1.240712000 1.606315000

|   |              |              |              |
|---|--------------|--------------|--------------|
| 7 | -0.006152000 | -1.893727000 | -0.811618000 |
| 1 | -0.006665000 | -2.850264000 | -0.503412000 |
| 1 | 0.003279000  | -1.803650000 | -1.813318000 |

Cartesian coordinates of the C – H splitting product obtained for CAASis (**1Si-5Si**, **8Si-9Si** and **14Si**) and CAAGes (**1Ge-5Ge**, **8Ge-9Ge** and **14Ge**), along with their total energies (in hartrees) including zero point vibrational correction.

**1Si<sup>PC-H</sup>** (T.E.= -1781.893879)

|    |              |              |              |
|----|--------------|--------------|--------------|
| 7  | -0.657867000 | -0.862560000 | -0.702895000 |
| 14 | 0.124354000  | 0.401477000  | 0.225557000  |
| 6  | 1.856287000  | -0.050033000 | -0.292218000 |
| 6  | 0.260658000  | -1.436969000 | -1.675275000 |
| 6  | 1.513719000  | -0.571473000 | -1.718033000 |
| 1  | 1.325958000  | 0.274859000  | -2.388656000 |
| 1  | 2.343490000  | -1.132411000 | -2.161098000 |
| 1  | -0.200391000 | -1.488940000 | -2.668837000 |
| 1  | 0.515783000  | -2.469557000 | -1.393534000 |
| 6  | -1.845667000 | -1.526570000 | -0.430488000 |
| 6  | -2.217860000 | -2.686472000 | -1.118143000 |
| 6  | -2.716184000 | -1.053778000 | 0.560190000  |
| 6  | -3.405295000 | -3.336401000 | -0.821522000 |
| 1  | -1.580812000 | -3.088402000 | -1.895402000 |
| 6  | -3.895484000 | -1.708364000 | 0.844713000  |
| 1  | -2.474548000 | -0.145771000 | 1.102627000  |
| 6  | -4.255541000 | -2.858988000 | 0.157805000  |
| 1  | -3.664081000 | -4.232648000 | -1.374998000 |
| 1  | -4.546486000 | -1.303619000 | 1.612089000  |
| 1  | -5.184280000 | -3.369531000 | 0.381872000  |
| 14 | 3.092072000  | 1.372545000  | -0.362411000 |
| 14 | 2.444499000  | -1.469679000 | 0.833694000  |
| 6  | 3.058189000  | 2.401382000  | 1.206308000  |
| 1  | 3.603263000  | 3.333392000  | 1.033073000  |
| 1  | 2.042701000  | 2.669966000  | 1.509403000  |
| 1  | 3.530634000  | 1.894136000  | 2.048411000  |
| 6  | 4.841558000  | 0.764141000  | -0.657828000 |
| 1  | 5.499344000  | 1.626406000  | -0.797512000 |
| 1  | 5.241687000  | 0.170523000  | 0.165922000  |
| 1  | 4.893758000  | 0.160714000  | -1.568471000 |
| 6  | 2.738763000  | 2.521528000  | -1.805299000 |

|   |              |              |              |
|---|--------------|--------------|--------------|
| 1 | 3.491891000  | 3.314648000  | -1.787939000 |
| 1 | 2.827535000  | 2.011889000  | -2.767533000 |
| 1 | 1.758788000  | 2.999032000  | -1.761539000 |
| 6 | 3.670635000  | -2.557023000 | -0.078767000 |
| 1 | 4.526539000  | -2.004997000 | -0.470505000 |
| 1 | 4.048624000  | -3.314053000 | 0.614205000  |
| 1 | 3.200315000  | -3.086659000 | -0.910699000 |
| 6 | 3.237673000  | -0.818008000 | 2.402737000  |
| 1 | 3.451297000  | -1.672151000 | 3.051324000  |
| 1 | 4.175650000  | -0.284546000 | 2.239077000  |
| 1 | 2.557583000  | -0.156193000 | 2.945725000  |
| 6 | 1.072360000  | -2.607748000 | 1.430114000  |
| 1 | 0.301742000  | -2.085367000 | 2.001562000  |
| 1 | 0.579647000  | -3.160960000 | 0.628675000  |
| 1 | 1.533976000  | -3.340685000 | 2.099296000  |
| 1 | -0.149866000 | 0.284460000  | 1.678930000  |
| 6 | -0.482802000 | 2.108483000  | -0.304437000 |
| 1 | 0.087493000  | 2.865531000  | 0.244162000  |
| 1 | -0.260963000 | 2.232319000  | -1.368217000 |
| 6 | -1.945889000 | 2.254560000  | -0.052054000 |
| 6 | -2.871414000 | 1.984569000  | -1.055368000 |
| 6 | -2.422400000 | 2.588227000  | 1.213314000  |
| 6 | -4.230209000 | 2.034111000  | -0.801485000 |
| 1 | -2.514514000 | 1.716011000  | -2.045204000 |
| 6 | -3.781648000 | 2.639240000  | 1.470031000  |
| 1 | -1.711525000 | 2.801287000  | 2.006979000  |
| 6 | -4.692087000 | 2.357938000  | 0.463938000  |
| 1 | -4.933901000 | 1.811648000  | -1.595397000 |
| 1 | -4.132054000 | 2.899497000  | 2.462488000  |
| 1 | -5.756334000 | 2.393183000  | 0.664804000  |

**2SiP<sup>C-H</sup>** (T.E.= -1780.699514)

|    |              |              |              |
|----|--------------|--------------|--------------|
| 7  | -0.586670000 | -0.983923000 | -0.563129000 |
| 14 | 0.219425000  | 0.315730000  | 0.321925000  |
| 6  | 1.932876000  | -0.148137000 | -0.263017000 |
| 6  | 0.296863000  | -1.396397000 | -1.564928000 |
| 6  | 1.564430000  | -0.978293000 | -1.473758000 |
| 6  | -1.907046000 | -1.430112000 | -0.479118000 |
| 6  | -2.599555000 | -1.921535000 | -1.586526000 |
| 6  | -2.576374000 | -1.366913000 | 0.744396000  |

|    |              |              |              |
|----|--------------|--------------|--------------|
| 6  | -3.919268000 | -2.320297000 | -1.469120000 |
| 1  | -2.117434000 | -1.963458000 | -2.555657000 |
| 6  | -3.897601000 | -1.752813000 | 0.847789000  |
| 1  | -2.052138000 | -0.995640000 | 1.618883000  |
| 6  | -4.582119000 | -2.236091000 | -0.256480000 |
| 1  | -4.438011000 | -2.691202000 | -2.346216000 |
| 1  | -4.396064000 | -1.678853000 | 1.807858000  |
| 1  | -5.617753000 | -2.542002000 | -0.172283000 |
| 14 | 3.056984000  | 1.303659000  | -0.684495000 |
| 14 | 2.660707000  | -1.374760000 | 0.995338000  |
| 6  | 3.141113000  | 2.534698000  | 0.729247000  |
| 1  | 3.594083000  | 3.463260000  | 0.371296000  |
| 1  | 2.155116000  | 2.785582000  | 1.128827000  |
| 1  | 3.749825000  | 2.167204000  | 1.557322000  |
| 6  | 4.802448000  | 0.739645000  | -1.071126000 |
| 1  | 5.379618000  | 1.595660000  | -1.431392000 |
| 1  | 5.316081000  | 0.338880000  | -0.194253000 |
| 1  | 4.819830000  | -0.023719000 | -1.853371000 |
| 6  | 2.433668000  | 2.190716000  | -2.214476000 |
| 1  | 3.204655000  | 2.883653000  | -2.562417000 |
| 1  | 2.220561000  | 1.491820000  | -3.026735000 |
| 1  | 1.530221000  | 2.772621000  | -2.024527000 |
| 6  | 4.001503000  | -2.428185000 | 0.219977000  |
| 1  | 4.849198000  | -1.851620000 | -0.150838000 |
| 1  | 4.374065000  | -3.123090000 | 0.977970000  |
| 1  | 3.604140000  | -3.024049000 | -0.604702000 |
| 6  | 3.362694000  | -0.478997000 | 2.485026000  |
| 1  | 3.604445000  | -1.210774000 | 3.260516000  |
| 1  | 4.280449000  | 0.063482000  | 2.247542000  |
| 1  | 2.646591000  | 0.229892000  | 2.909098000  |
| 6  | 1.361219000  | -2.577170000 | 1.616601000  |
| 1  | 0.577606000  | -2.094396000 | 2.204128000  |
| 1  | 0.886525000  | -3.128664000 | 0.802084000  |
| 1  | 1.860135000  | -3.303887000 | 2.264726000  |
| 1  | -0.066298000 | -2.053546000 | -2.344754000 |
| 1  | 2.305902000  | -1.266509000 | -2.211264000 |
| 1  | 0.019773000  | 0.251010000  | 1.788341000  |
| 6  | -0.509744000 | 1.951020000  | -0.264907000 |
| 1  | -0.369661000 | 2.005549000  | -1.348580000 |
| 1  | 0.043961000  | 2.779983000  | 0.187065000  |

|   |              |             |              |
|---|--------------|-------------|--------------|
| 6 | -1.960131000 | 2.010216000 | 0.087864000  |
| 6 | -2.369800000 | 2.367672000 | 1.369620000  |
| 6 | -2.932417000 | 1.633048000 | -0.833781000 |
| 6 | -3.708444000 | 2.342324000 | 1.720954000  |
| 1 | -1.623362000 | 2.665643000 | 2.100818000  |
| 6 | -4.270143000 | 1.601110000 | -0.484104000 |
| 1 | -2.627243000 | 1.342602000 | -1.835033000 |
| 6 | -4.664352000 | 1.953431000 | 0.796168000  |
| 1 | -4.006436000 | 2.625805000 | 2.724144000  |
| 1 | -5.008306000 | 1.291354000 | -1.215198000 |
| 1 | -5.711937000 | 1.926424000 | 1.071954000  |

**3SiP<sup>C-H</sup>** (T.E.= -1901.997666)

|    |              |              |              |
|----|--------------|--------------|--------------|
| 6  | -1.779916000 | 0.969745000  | -1.132289000 |
| 6  | -1.916728000 | -0.251497000 | -0.154194000 |
| 1  | -1.597640000 | 0.612046000  | -2.156262000 |
| 1  | -2.715648000 | 1.535360000  | -1.182333000 |
| 14 | -0.124108000 | -0.625953000 | 0.190515000  |
| 7  | 0.514021000  | 0.978767000  | -0.102459000 |
| 5  | -0.518352000 | 1.823392000  | -0.671577000 |
| 7  | -0.466365000 | 3.232883000  | -0.747899000 |
| 6  | -1.419067000 | 4.008239000  | -1.506465000 |
| 1  | -2.048600000 | 4.623472000  | -0.850133000 |
| 1  | -0.901917000 | 4.689462000  | -2.192862000 |
| 1  | -2.066115000 | 3.366234000  | -2.101591000 |
| 6  | 0.461687000  | 4.075472000  | -0.031086000 |
| 1  | -0.087751000 | 4.876597000  | 0.477480000  |
| 1  | 1.006086000  | 3.514170000  | 0.726314000  |
| 1  | 1.194376000  | 4.548521000  | -0.697388000 |
| 14 | -2.868551000 | -1.680118000 | -0.921713000 |
| 14 | -2.687143000 | 0.377641000  | 1.461038000  |
| 6  | -2.326659000 | -1.967791000 | -2.696717000 |
| 1  | -2.837779000 | -2.859086000 | -3.071999000 |
| 1  | -2.615626000 | -1.133267000 | -3.339778000 |
| 1  | -1.253430000 | -2.128733000 | -2.810578000 |
| 6  | -4.709341000 | -1.331335000 | -1.025911000 |
| 1  | -5.197421000 | -2.133272000 | -1.586596000 |
| 1  | -5.190649000 | -1.266675000 | -0.047759000 |
| 1  | -4.895658000 | -0.394316000 | -1.558391000 |
| 6  | -4.192138000 | 1.444412000  | 1.113426000  |



|   |              |              |              |
|---|--------------|--------------|--------------|
| 1 | -4.940437000 | 0.958112000  | 0.486528000  |
| 1 | -4.664470000 | 1.701565000  | 2.065908000  |
| 1 | -3.902099000 | 2.382383000  | 0.632018000  |
| 6 | -3.172724000 | -1.021471000 | 2.610140000  |
| 1 | -3.452200000 | -0.592602000 | 3.576405000  |
| 1 | -4.026217000 | -1.597540000 | 2.247207000  |
| 1 | -2.342552000 | -1.711287000 | 2.780687000  |
| 6 | -2.624526000 | -3.276330000 | 0.040745000  |
| 1 | -1.579786000 | -3.466242000 | 0.301926000  |
| 1 | -3.197533000 | -3.279117000 | 0.969266000  |
| 1 | -2.969128000 | -4.120877000 | -0.562091000 |
| 6 | -1.532424000 | 1.494359000  | 2.439519000  |
| 1 | -0.609810000 | 0.999065000  | 2.749302000  |
| 1 | -1.262972000 | 2.397455000  | 1.885530000  |
| 1 | -2.062759000 | 1.808011000  | 3.344057000  |
| 6 | 1.883991000  | 1.276385000  | 0.034396000  |
| 6 | 2.586987000  | 1.896150000  | -0.997579000 |
| 6 | 2.578853000  | 0.918855000  | 1.187487000  |
| 6 | 3.936954000  | 2.167932000  | -0.868962000 |
| 1 | 2.059355000  | 2.158327000  | -1.909074000 |
| 6 | 3.934040000  | 1.171365000  | 1.303013000  |
| 1 | 2.047386000  | 0.426174000  | 1.995004000  |
| 6 | 4.620555000  | 1.805355000  | 0.281163000  |
| 1 | 4.462647000  | 2.655177000  | -1.682638000 |
| 1 | 4.456501000  | 0.869310000  | 2.203687000  |
| 1 | 5.680750000  | 2.007691000  | 0.375676000  |
| 1 | 0.116657000  | -1.098857000 | 1.579313000  |
| 6 | 0.754299000  | -1.868534000 | -0.932619000 |
| 1 | 0.167964000  | -2.792485000 | -0.948365000 |
| 1 | 0.753230000  | -1.463964000 | -1.950017000 |
| 6 | 2.147842000  | -2.141846000 | -0.469160000 |
| 6 | 3.247338000  | -1.600767000 | -1.126076000 |
| 6 | 2.374824000  | -2.907455000 | 0.672298000  |
| 6 | 4.531202000  | -1.798717000 | -0.649348000 |
| 1 | 3.087428000  | -0.997024000 | -2.014128000 |
| 6 | 3.657087000  | -3.109447000 | 1.150924000  |
| 1 | 1.526271000  | -3.342388000 | 1.194096000  |
| 6 | 4.742263000  | -2.550534000 | 0.494633000  |
| 1 | 5.371108000  | -1.356386000 | -1.173345000 |
| 1 | 3.810506000  | -3.707276000 | 2.042317000  |

1 5.746938000 -2.703478000 0.871187000

**4SiP<sup>C-H</sup>** (T.E.= -2111.907489)

6 -2.119128000 1.533104000 -0.533668000  
6 -1.992031000 0.027432000 -0.087473000  
1 -2.595692000 1.617776000 -1.516849000  
1 -2.773206000 2.096448000 0.141138000  
14 -0.181914000 -0.446193000 -0.285664000  
7 0.600711000 1.093474000 -0.159074000  
14 -2.990266000 -1.058552000 -1.265598000  
14 -2.540300000 -0.067467000 1.717920000  
6 -2.638041000 -0.567548000 -3.044429000  
1 -1.568290000 -0.492802000 -3.252363000  
1 -3.053560000 -1.331714000 -3.707496000  
1 -3.103967000 0.383043000 -3.314078000  
6 -4.840191000 -0.866606000 -1.027522000  
1 -5.360115000 -1.340498000 -1.864694000  
1 -5.201720000 -1.328655000 -0.106546000  
1 -5.126180000 0.188630000 -1.011835000  
6 -4.221175000 0.723128000 1.996883000  
1 -5.029191000 0.182128000 1.503077000  
1 -4.417580000 0.701325000 3.073326000  
1 -4.269742000 1.766916000 1.681269000  
6 -2.699272000 -1.816468000 2.378163000  
1 -2.990998000 -1.752936000 3.430583000  
1 -3.482613000 -2.373316000 1.858144000  
1 -1.780111000 -2.400845000 2.327536000  
6 -2.534330000 -2.869451000 -1.081846000  
1 -2.676061000 -3.243735000 -0.065982000  
1 -3.164692000 -3.465698000 -1.747254000  
1 -1.494914000 -3.051598000 -1.369035000  
6 -1.358290000 0.893239000 2.819917000  
1 -0.309590000 0.609974000 2.707225000  
1 -1.433100000 1.965879000 2.622631000  
1 -1.642437000 0.736760000 3.864565000  
14 -0.445586000 2.400455000 -0.640692000  
6 -0.292969000 3.898619000 0.458960000  
1 -0.477972000 3.660364000 1.508238000  
1 0.705460000 4.335573000 0.381052000  
1 -1.012541000 4.661417000 0.150571000

|   |              |              |              |
|---|--------------|--------------|--------------|
| 6 | -0.066398000 | 2.903603000  | -2.398696000 |
| 1 | -0.150341000 | 2.039697000  | -3.065278000 |
| 1 | -0.757359000 | 3.672649000  | -2.752875000 |
| 1 | 0.949015000  | 3.298765000  | -2.486252000 |
| 6 | 2.002853000  | 1.278678000  | -0.125535000 |
| 6 | 2.586413000  | 1.957667000  | 0.940805000  |
| 6 | 2.822668000  | 0.803191000  | -1.146027000 |
| 6 | 3.956293000  | 2.153679000  | 0.986088000  |
| 1 | 1.945064000  | 2.313438000  | 1.741209000  |
| 6 | 4.192367000  | 0.986269000  | -1.089455000 |
| 1 | 2.373180000  | 0.272067000  | -1.979473000 |
| 6 | 4.765946000  | 1.666513000  | -0.027071000 |
| 1 | 4.394298000  | 2.683281000  | 1.824703000  |
| 1 | 4.816861000  | 0.592760000  | -1.883593000 |
| 1 | 5.839014000  | 1.811332000  | 0.013416000  |
| 1 | 0.055999000  | -1.051699000 | -1.628896000 |
| 6 | 0.521151000  | -1.734292000 | 0.901514000  |
| 1 | 0.445127000  | -1.386409000 | 1.934903000  |
| 1 | -0.124213000 | -2.614944000 | 0.806366000  |
| 6 | 1.932310000  | -2.093955000 | 0.565306000  |
| 6 | 2.994483000  | -1.629248000 | 1.333633000  |
| 6 | 2.220631000  | -2.873145000 | -0.552515000 |
| 6 | 4.302882000  | -1.925640000 | 0.994613000  |
| 1 | 2.787576000  | -1.018235000 | 2.207437000  |
| 6 | 3.528093000  | -3.168513000 | -0.896506000 |
| 1 | 1.403251000  | -3.250632000 | -1.160489000 |
| 6 | 4.576567000  | -2.694148000 | -0.125005000 |
| 1 | 5.114010000  | -1.550277000 | 1.608362000  |
| 1 | 3.729322000  | -3.777131000 | -1.770974000 |
| 1 | 5.600969000  | -2.925465000 | -0.392581000 |

**5SiP<sup>C-H</sup>** (T.E.= -1855.962785)

|    |              |              |              |
|----|--------------|--------------|--------------|
| 6  | -1.823382000 | -1.557724000 | 0.995964000  |
| 6  | -1.977848000 | -0.205764000 | 0.249852000  |
| 1  | -2.026565000 | -1.454957000 | 2.069235000  |
| 1  | -2.510293000 | -2.333112000 | 0.644137000  |
| 14 | -0.238006000 | 0.451569000  | 0.388471000  |
| 7  | 0.506896000  | -1.125561000 | 0.631500000  |
| 14 | -3.136344000 | 1.009339000  | 1.118053000  |
| 14 | -2.443444000 | -0.604500000 | -1.543861000 |

|   |              |              |              |
|---|--------------|--------------|--------------|
| 6 | -2.902031000 | 0.888014000  | 2.973647000  |
| 1 | -1.851415000 | 0.931130000  | 3.269770000  |
| 1 | -3.417708000 | 1.725968000  | 3.450541000  |
| 1 | -3.331807000 | -0.031161000 | 3.378494000  |
| 6 | -4.945261000 | 0.676426000  | 0.773289000  |
| 1 | -5.556212000 | 1.325404000  | 1.406541000  |
| 1 | -5.217998000 | 0.870794000  | -0.266207000 |
| 1 | -5.206622000 | -0.359220000 | 1.006273000  |
| 6 | -4.016098000 | -1.621304000 | -1.636993000 |
| 1 | -4.906604000 | -1.051345000 | -1.370825000 |
| 1 | -4.133966000 | -1.957669000 | -2.671343000 |
| 1 | -3.983753000 | -2.515083000 | -1.010719000 |
| 6 | -2.732475000 | 0.936391000  | -2.569348000 |
| 1 | -2.903247000 | 0.636818000  | -3.607078000 |
| 1 | -3.626791000 | 1.468375000  | -2.234701000 |
| 1 | -1.897837000 | 1.638726000  | -2.561443000 |
| 6 | -2.729802000 | 2.762072000  | 0.584409000  |
| 1 | -2.811316000 | 2.903197000  | -0.495629000 |
| 1 | -3.427719000 | 3.454705000  | 1.062168000  |
| 1 | -1.721936000 | 3.057591000  | 0.890671000  |
| 6 | -1.121914000 | -1.678641000 | -2.336537000 |
| 1 | -0.115467000 | -1.255617000 | -2.316029000 |
| 1 | -1.080235000 | -2.655760000 | -1.846095000 |
| 1 | -1.392118000 | -1.853719000 | -3.381640000 |
| 6 | 1.899022000  | -1.403639000 | 0.632037000  |
| 6 | 2.740718000  | -0.661637000 | 1.448692000  |
| 6 | 2.430002000  | -2.380258000 | -0.199498000 |
| 6 | 4.105198000  | -0.886756000 | 1.428490000  |
| 1 | 2.318821000  | 0.101755000  | 2.094055000  |
| 6 | 3.794741000  | -2.608354000 | -0.207774000 |
| 1 | 1.769231000  | -2.957038000 | -0.835019000 |
| 6 | 4.636195000  | -1.862987000 | 0.602694000  |
| 1 | 4.755224000  | -0.290069000 | 2.057893000  |
| 1 | 4.204090000  | -3.374104000 | -0.856534000 |
| 1 | 5.704892000  | -2.041835000 | 0.588074000  |
| 6 | -0.413680000 | -2.116876000 | 0.910723000  |
| 8 | -0.149840000 | -3.277507000 | 1.114451000  |
| 1 | -0.014573000 | 1.286036000  | 1.596833000  |
| 6 | 0.480919000  | 1.433656000  | -1.043026000 |
| 1 | 0.338652000  | 0.899715000  | -1.985043000 |

|   |              |             |              |
|---|--------------|-------------|--------------|
| 1 | -0.123573000 | 2.347386000 | -1.099747000 |
| 6 | 1.922950000  | 1.776114000 | -0.843599000 |
| 6 | 2.917272000  | 1.077780000 | -1.519837000 |
| 6 | 2.303053000  | 2.772571000 | 0.049971000  |
| 6 | 4.254038000  | 1.365159000 | -1.310362000 |
| 1 | 2.633126000  | 0.290212000 | -2.212320000 |
| 6 | 3.640066000  | 3.060977000 | 0.263184000  |
| 1 | 1.535767000  | 3.328479000 | 0.582455000  |
| 6 | 4.621524000  | 2.358413000 | -0.416909000 |
| 1 | 5.013168000  | 0.804061000 | -1.843464000 |
| 1 | 3.916648000  | 3.843436000 | 0.960702000  |
| 1 | 5.668464000  | 2.584378000 | -0.251815000 |

**8SiP<sup>C-H</sup>** (T.E.= -1424.570285)

|    |              |              |              |
|----|--------------|--------------|--------------|
| 6  | 0.775231000  | -2.250632000 | 0.643309000  |
| 6  | 2.227688000  | -1.963143000 | 0.286744000  |
| 6  | 2.368022000  | -0.455930000 | 0.127037000  |
| 1  | 0.513715000  | -3.292566000 | 0.428149000  |
| 1  | 0.621119000  | -2.091304000 | 1.724008000  |
| 1  | 2.475566000  | -2.511208000 | -0.635625000 |
| 1  | 2.876223000  | -2.368534000 | 1.073877000  |
| 14 | 0.751875000  | 0.194497000  | -0.320867000 |
| 7  | -0.060628000 | -1.353905000 | -0.144936000 |
| 15 | 3.857486000  | 0.262445000  | -0.087171000 |
| 6  | 5.032903000  | -0.045021000 | 1.253643000  |
| 1  | 5.158109000  | -1.122838000 | 1.374896000  |
| 1  | 6.006281000  | 0.400194000  | 1.040031000  |
| 1  | 4.633271000  | 0.363564000  | 2.182238000  |
| 6  | 4.811866000  | -0.234377000 | -1.552191000 |
| 1  | 4.247267000  | 0.025685000  | -2.448968000 |
| 1  | 5.792201000  | 0.245941000  | -1.583252000 |
| 1  | 4.949222000  | -1.317733000 | -1.535087000 |
| 6  | 3.710451000  | 2.050573000  | -0.225176000 |
| 1  | 3.046468000  | 2.300099000  | -1.055247000 |
| 1  | 3.297356000  | 2.457984000  | 0.697924000  |
| 1  | 4.689173000  | 2.496181000  | -0.409594000 |
| 6  | -1.417101000 | -1.609609000 | -0.269664000 |
| 6  | -2.083728000 | -2.540805000 | 0.532686000  |
| 6  | -2.170905000 | -0.917487000 | -1.227117000 |
| 6  | -3.447588000 | -2.746550000 | 0.393231000  |

|   |              |              |              |
|---|--------------|--------------|--------------|
| 1 | -1.539071000 | -3.092720000 | 1.288848000  |
| 6 | -3.526286000 | -1.128058000 | -1.355076000 |
| 1 | -1.671914000 | -0.203500000 | -1.873757000 |
| 6 | -4.183251000 | -2.043222000 | -0.543125000 |
| 1 | -3.938731000 | -3.469045000 | 1.036371000  |
| 1 | -4.079421000 | -0.567740000 | -2.101062000 |
| 1 | -5.249353000 | -2.206426000 | -0.644806000 |
| 1 | 0.531760000  | 0.768813000  | -1.681583000 |
| 6 | 0.056453000  | 1.501618000  | 0.862364000  |
| 1 | 0.207571000  | 1.110752000  | 1.873922000  |
| 1 | 0.694756000  | 2.387029000  | 0.757800000  |
| 6 | -1.372376000 | 1.843575000  | 0.621641000  |
| 6 | -2.385121000 | 1.227272000  | 1.351948000  |
| 6 | -1.739809000 | 2.733446000  | -0.385005000 |
| 6 | -3.717328000 | 1.480189000  | 1.081344000  |
| 1 | -2.115984000 | 0.524343000  | 2.135311000  |
| 6 | -3.072536000 | 2.990842000  | -0.657765000 |
| 1 | -0.963279000 | 3.224790000  | -0.964980000 |
| 6 | -4.068651000 | 2.362679000  | 0.072566000  |
| 1 | -4.486503000 | 0.976011000  | 1.655667000  |
| 1 | -3.335236000 | 3.687455000  | -1.446305000 |
| 1 | -5.112301000 | 2.560312000  | -0.142885000 |

**9SiP<sup>C-H</sup>** (T.E.= -1423.380748)

|    |              |              |              |
|----|--------------|--------------|--------------|
| 6  | -0.853768000 | -2.279648000 | 0.406558000  |
| 6  | -2.126186000 | -1.856450000 | 0.481870000  |
| 6  | -2.379325000 | -0.498223000 | 0.008814000  |
| 14 | -0.752632000 | 0.187103000  | -0.393455000 |
| 7  | 0.064213000  | -1.359360000 | -0.142830000 |
| 15 | -3.901707000 | 0.193663000  | -0.078560000 |
| 6  | -5.111083000 | -0.744662000 | -1.043441000 |
| 1  | -5.190546000 | -1.750018000 | -0.625241000 |
| 1  | -6.095009000 | -0.272273000 | -1.021177000 |
| 1  | -4.761358000 | -0.826982000 | -2.072784000 |
| 6  | -3.821124000 | 1.826010000  | -0.828672000 |
| 1  | -4.819942000 | 2.260255000  | -0.892154000 |
| 1  | -3.190704000 | 2.479043000  | -0.223060000 |
| 1  | -3.399196000 | 1.751048000  | -1.831711000 |
| 6  | -4.753988000 | 0.426568000  | 1.502737000  |
| 1  | -4.158693000 | 1.086992000  | 2.134511000  |

|   |              |              |              |
|---|--------------|--------------|--------------|
| 1 | -5.752639000 | 0.846003000  | 1.364308000  |
| 1 | -4.839341000 | -0.541671000 | 2.000391000  |
| 6 | 1.423203000  | -1.631180000 | -0.252957000 |
| 6 | 2.190801000  | -0.944175000 | -1.198915000 |
| 6 | 2.070878000  | -2.557006000 | 0.569227000  |
| 6 | 3.549423000  | -1.157269000 | -1.302722000 |
| 1 | 1.704290000  | -0.230768000 | -1.855971000 |
| 6 | 3.434130000  | -2.768387000 | 0.452885000  |
| 1 | 1.509130000  | -3.089367000 | 1.327284000  |
| 6 | 4.187419000  | -2.071409000 | -0.476931000 |
| 1 | 4.117192000  | -0.600040000 | -2.039835000 |
| 1 | 3.914212000  | -3.485093000 | 1.110492000  |
| 1 | 5.254680000  | -2.238088000 | -0.558834000 |
| 1 | -0.507824000 | -3.270217000 | 0.666388000  |
| 1 | -2.909503000 | -2.510300000 | 0.853587000  |
| 1 | -0.528196000 | 0.764779000  | -1.749870000 |
| 6 | -0.097522000 | 1.506084000  | 0.799196000  |
| 1 | -0.280241000 | 1.130037000  | 1.810615000  |
| 1 | -0.735973000 | 2.386880000  | 0.657010000  |
| 6 | 1.337519000  | 1.845643000  | 0.595214000  |
| 6 | 2.330446000  | 1.232524000  | 1.355022000  |
| 6 | 1.731192000  | 2.725889000  | -0.410229000 |
| 6 | 3.669366000  | 1.479133000  | 1.113171000  |
| 1 | 2.041432000  | 0.536571000  | 2.137283000  |
| 6 | 3.070829000  | 2.976058000  | -0.654240000 |
| 1 | 0.970398000  | 3.215227000  | -1.012286000 |
| 6 | 4.047297000  | 2.350928000  | 0.104649000  |
| 1 | 4.423085000  | 0.978549000  | 1.710634000  |
| 1 | 3.354273000  | 3.664839000  | -1.442446000 |
| 1 | 5.096396000  | 2.543151000  | -0.087961000 |

**<sup>14</sup>SiP<sup>C-H</sup> (T.E.= -1618.742079)**

|   |              |              |              |
|---|--------------|--------------|--------------|
| 6 | 2.437999000  | 0.942173000  | 0.131056000  |
| 6 | 2.163505000  | -0.452411000 | -0.061520000 |
| 7 | -0.048228000 | 0.977815000  | -0.325819000 |
| 6 | -1.408289000 | 1.331483000  | -0.220372000 |
| 6 | -1.882769000 | 1.980234000  | 0.917974000  |
| 6 | -3.223278000 | 2.296411000  | 1.039750000  |
| 6 | -4.117825000 | 1.956671000  | 0.036638000  |
| 6 | -3.655551000 | 1.301942000  | -1.093003000 |

|    |              |              |              |
|----|--------------|--------------|--------------|
| 6  | -2.312247000 | 0.996786000  | -1.224696000 |
| 1  | -1.178108000 | 2.232261000  | 1.704357000  |
| 1  | -3.574656000 | 2.804210000  | 1.931104000  |
| 1  | -5.169740000 | 2.196600000  | 0.137426000  |
| 1  | -4.346708000 | 1.020938000  | -1.879639000 |
| 1  | -1.948628000 | 0.486679000  | -2.110957000 |
| 5  | 1.100671000  | 1.830327000  | -0.102329000 |
| 7  | 1.096368000  | 3.236641000  | -0.167711000 |
| 6  | 2.207562000  | 4.050376000  | 0.279121000  |
| 1  | 2.584004000  | 4.672961000  | -0.541937000 |
| 1  | 1.884808000  | 4.728983000  | 1.079231000  |
| 1  | 3.017228000  | 3.419417000  | 0.638547000  |
| 6  | 0.017583000  | 4.047594000  | -0.681330000 |
| 1  | -0.503624000 | 4.591999000  | 0.117422000  |
| 1  | 0.420198000  | 4.793386000  | -1.376377000 |
| 1  | -0.716748000 | 3.451777000  | -1.218899000 |
| 15 | 3.499345000  | -1.507570000 | -0.012187000 |
| 6  | 4.334555000  | -1.579160000 | 1.581663000  |
| 1  | 5.183130000  | -2.264617000 | 1.540156000  |
| 1  | 4.679171000  | -0.576292000 | 1.833442000  |
| 1  | 3.627637000  | -1.915843000 | 2.340813000  |
| 6  | 4.787116000  | -1.112625000 | -1.206892000 |
| 1  | 5.633212000  | -1.793730000 | -1.099181000 |
| 1  | 4.377180000  | -1.192147000 | -2.214222000 |
| 1  | 5.108286000  | -0.086284000 | -1.030280000 |
| 6  | 2.993252000  | -3.195367000 | -0.376273000 |
| 1  | 2.312214000  | -3.556009000 | 0.395721000  |
| 1  | 2.487122000  | -3.228885000 | -1.342508000 |
| 1  | 3.866852000  | -3.848595000 | -0.408582000 |
| 8  | 3.573825000  | 1.380124000  | 0.394807000  |
| 14 | 0.405423000  | -0.712525000 | -0.403746000 |
| 1  | 0.077562000  | -1.313640000 | -1.726910000 |
| 6  | -0.532458000 | -1.747171000 | 0.869498000  |
| 1  | -0.436203000 | -1.241007000 | 1.835732000  |
| 1  | 0.023068000  | -2.689405000 | 0.952326000  |
| 6  | -1.962490000 | -2.022212000 | 0.539277000  |
| 6  | -2.998732000 | -1.418928000 | 1.244584000  |
| 6  | -2.294921000 | -2.866409000 | -0.518677000 |
| 6  | -4.320334000 | -1.638402000 | 0.898093000  |
| 1  | -2.761233000 | -0.750322000 | 2.066318000  |



|   |              |              |              |
|---|--------------|--------------|--------------|
| 6 | -3.615313000 | -3.089986000 | -0.866361000 |
| 1 | -1.499482000 | -3.349406000 | -1.079365000 |
| 6 | -4.636418000 | -2.473211000 | -0.160676000 |
| 1 | -5.108835000 | -1.149557000 | 1.459509000  |
| 1 | -3.849152000 | -3.750105000 | -1.694247000 |
| 1 | -5.671276000 | -2.645021000 | -0.432977000 |

**1GeP<sup>C-H</sup>** (T.E.= -3569.339045)

|    |              |              |              |
|----|--------------|--------------|--------------|
| 6  | -0.295102000 | 1.514070000  | -1.675875000 |
| 6  | -1.536577000 | 0.631584000  | -1.721238000 |
| 6  | -1.902841000 | 0.091933000  | -0.313800000 |
| 1  | 0.124609000  | 1.614112000  | -2.685028000 |
| 1  | -0.564282000 | 2.531773000  | -1.352648000 |
| 1  | -1.335698000 | -0.204886000 | -2.401196000 |
| 1  | -2.368187000 | 1.189368000  | -2.166365000 |
| 32 | -0.104960000 | -0.428491000 | 0.258156000  |
| 7  | 0.674185000  | 0.929814000  | -0.769892000 |
| 14 | -2.488740000 | 1.481666000  | 0.844745000  |
| 14 | -3.103460000 | -1.357382000 | -0.418422000 |
| 6  | -2.707801000 | -2.461555000 | -1.883791000 |
| 1  | -1.698694000 | -2.876545000 | -1.859085000 |
| 1  | -3.408774000 | -3.301085000 | -1.870913000 |
| 1  | -2.839308000 | -1.942354000 | -2.835850000 |
| 6  | -3.026030000 | -2.420592000 | 1.125166000  |
| 1  | -3.429052000 | -1.917607000 | 2.005139000  |
| 1  | -3.610419000 | -3.330830000 | 0.965680000  |
| 1  | -2.003108000 | -2.729639000 | 1.358616000  |
| 6  | -4.866374000 | -0.782224000 | -0.695960000 |
| 1  | -4.927146000 | -0.140685000 | -1.579656000 |
| 1  | -5.504813000 | -1.651360000 | -0.876301000 |
| 1  | -5.283320000 | -0.233536000 | 0.150562000  |
| 6  | -3.254951000 | 0.786473000  | 2.408130000  |
| 1  | -2.557384000 | 0.127165000  | 2.931897000  |
| 1  | -3.480142000 | 1.621850000  | 3.076833000  |
| 1  | -4.183381000 | 0.238077000  | 2.239546000  |
| 6  | -1.112108000 | 2.613335000  | 1.442910000  |
| 1  | -0.622555000 | 3.169994000  | 0.642086000  |
| 1  | -1.563900000 | 3.341293000  | 2.123842000  |
| 1  | -0.336336000 | 2.084071000  | 2.001491000  |

|   |              |              |              |
|---|--------------|--------------|--------------|
| 6 | -3.738869000 | 2.568034000  | -0.034525000 |
| 1 | -3.290005000 | 3.100023000  | -0.876840000 |
| 1 | -4.598845000 | 2.009152000  | -0.407790000 |
| 1 | -4.107335000 | 3.321829000  | 0.666804000  |
| 6 | 1.832001000  | 1.622825000  | -0.478633000 |
| 6 | 2.161744000  | 2.822635000  | -1.123577000 |
| 6 | 2.730965000  | 1.141887000  | 0.484435000  |
| 6 | 3.331520000  | 3.496694000  | -0.812953000 |
| 1 | 1.503507000  | 3.233163000  | -1.878602000 |
| 6 | 3.892565000  | 1.821407000  | 0.782247000  |
| 1 | 2.521970000  | 0.207220000  | 0.995212000  |
| 6 | 4.208773000  | 3.009421000  | 0.138221000  |
| 1 | 3.555597000  | 4.422192000  | -1.332841000 |
| 1 | 4.564203000  | 1.407570000  | 1.526898000  |
| 1 | 5.123007000  | 3.540754000  | 0.373093000  |
| 1 | 0.225666000  | -0.286533000 | 1.763131000  |
| 6 | 0.587841000  | -2.173897000 | -0.360010000 |
| 1 | 0.374650000  | -2.243944000 | -1.428463000 |
| 1 | 0.026248000  | -2.957024000 | 0.156655000  |
| 6 | 2.047805000  | -2.268778000 | -0.090340000 |
| 6 | 2.976353000  | -1.967957000 | -1.082462000 |
| 6 | 2.519388000  | -2.589068000 | 1.180862000  |
| 6 | 4.333012000  | -1.978308000 | -0.812742000 |
| 1 | 2.622785000  | -1.707861000 | -2.075566000 |
| 6 | 3.876111000  | -2.599376000 | 1.453230000  |
| 1 | 1.806064000  | -2.824597000 | 1.966084000  |
| 6 | 4.789451000  | -2.290309000 | 0.457549000  |
| 1 | 5.038814000  | -1.733320000 | -1.598043000 |
| 1 | 4.222728000  | -2.849854000 | 2.449465000  |
| 1 | 5.851818000  | -2.294288000 | 0.670836000  |

**2GeP<sup>C-H</sup>** (T.E.= -3568.146920)

|    |              |              |              |
|----|--------------|--------------|--------------|
| 6  | 1.993087000  | 0.207160000  | 0.254104000  |
| 6  | 1.625940000  | 1.193063000  | 1.340268000  |
| 6  | 0.366657000  | 1.645419000  | 1.410496000  |
| 1  | 2.385844000  | 1.575471000  | 2.014115000  |
| 1  | 0.056318000  | 2.408807000  | 2.114683000  |
| 32 | 0.203057000  | -0.318002000 | -0.360620000 |
| 7  | -0.571125000 | 1.164200000  | 0.509988000  |
| 14 | 3.003473000  | -1.238259000 | 0.919662000  |

|    |              |              |              |
|----|--------------|--------------|--------------|
| 14 | 2.794815000  | 1.230521000  | -1.133493000 |
| 6  | 3.053777000  | -2.655567000 | -0.307278000 |
| 1  | 3.542947000  | -3.516970000 | 0.155585000  |
| 1  | 2.055156000  | -2.977089000 | -0.615020000 |
| 1  | 3.613977000  | -2.402974000 | -1.208797000 |
| 6  | 4.208803000  | 2.261915000  | -0.466188000 |
| 1  | 5.041523000  | 1.663556000  | -0.095085000 |
| 1  | 4.586306000  | 2.902162000  | -1.268319000 |
| 1  | 3.867441000  | 2.912826000  | 0.341936000  |
| 6  | 3.421109000  | 0.129622000  | -2.515090000 |
| 1  | 2.641063000  | -0.543481000 | -2.881467000 |
| 1  | 3.746014000  | 0.748888000  | -3.355245000 |
| 1  | 4.273163000  | -0.478541000 | -2.202840000 |
| 6  | 1.560328000  | 2.440692000  | -1.857530000 |
| 1  | 0.739784000  | 1.955034000  | -2.389773000 |
| 1  | 1.132560000  | 3.079093000  | -1.081938000 |
| 1  | 2.082681000  | 3.084827000  | -2.570564000 |
| 6  | 4.762725000  | -0.726203000 | 1.314461000  |
| 1  | 5.267962000  | -1.549975000 | 1.826206000  |
| 1  | 5.342539000  | -0.484748000 | 0.421230000  |
| 1  | 4.789080000  | 0.141538000  | 1.978945000  |
| 6  | 2.257318000  | -1.857099000 | 2.521753000  |
| 1  | 2.916889000  | -2.611985000 | 2.958421000  |
| 1  | 2.148821000  | -1.046189000 | 3.245516000  |
| 1  | 1.277648000  | -2.317049000 | 2.382360000  |
| 6  | -1.901673000 | 1.567344000  | 0.486888000  |
| 6  | -2.544314000 | 2.091920000  | 1.610520000  |
| 6  | -2.639422000 | 1.429430000  | -0.691352000 |
| 6  | -3.878816000 | 2.452179000  | 1.550876000  |
| 1  | -2.006082000 | 2.188231000  | 2.546045000  |
| 6  | -3.972536000 | 1.783111000  | -0.738011000 |
| 1  | -2.153960000 | 1.028722000  | -1.576160000 |
| 6  | -4.606251000 | 2.299303000  | 0.382133000  |
| 1  | -4.358410000 | 2.848089000  | 2.439453000  |
| 1  | -4.522816000 | 1.651833000  | -1.663095000 |
| 1  | -5.652437000 | 2.577193000  | 0.344489000  |
| 1  | -0.037031000 | -0.308515000 | -1.888232000 |
| 6  | -0.684377000 | -1.912652000 | 0.400800000  |
| 1  | -0.133571000 | -2.799185000 | 0.076367000  |
| 1  | -0.593131000 | -1.828891000 | 1.485772000  |

|   |              |              |              |
|---|--------------|--------------|--------------|
| 6 | -2.111783000 | -1.959205000 | -0.021102000 |
| 6 | -3.124644000 | -1.544722000 | 0.838529000  |
| 6 | -2.462385000 | -2.367949000 | -1.305480000 |
| 6 | -4.445265000 | -1.531396000 | 0.427107000  |
| 1 | -2.868107000 | -1.217229000 | 1.841690000  |
| 6 | -3.782845000 | -2.355935000 | -1.719533000 |
| 1 | -1.684324000 | -2.699232000 | -1.987962000 |
| 6 | -4.780317000 | -1.933323000 | -0.855151000 |
| 1 | -5.215772000 | -1.192501000 | 1.110472000  |
| 1 | -4.034486000 | -2.679176000 | -2.723359000 |
| 1 | -5.814269000 | -1.920182000 | -1.179177000 |

**3GeP<sup>C-H</sup>** (T.E.= -3689.440400)

|    |              |              |              |
|----|--------------|--------------|--------------|
| 6  | 1.944898000  | 1.512373000  | -0.318207000 |
| 6  | 2.033428000  | -0.035362000 | -0.132366000 |
| 1  | 2.730157000  | 2.014534000  | 0.257757000  |
| 1  | 2.153247000  | 1.779972000  | -1.365254000 |
| 7  | -0.545613000 | 1.080935000  | -0.049889000 |
| 5  | 0.487664000  | 2.077912000  | 0.010166000  |
| 7  | 0.280983000  | 3.449491000  | 0.305120000  |
| 6  | 1.302046000  | 4.450915000  | 0.116696000  |
| 1  | 0.938759000  | 5.256188000  | -0.534535000 |
| 1  | 1.592781000  | 4.912580000  | 1.069570000  |
| 1  | 2.193591000  | 4.030647000  | -0.345236000 |
| 6  | -0.941767000 | 4.029561000  | 0.808365000  |
| 1  | -1.472073000 | 4.609940000  | 0.041377000  |
| 1  | -1.620195000 | 3.265841000  | 1.181328000  |
| 1  | -0.715603000 | 4.710193000  | 1.637666000  |
| 14 | 2.409550000  | -0.383607000 | 1.684254000  |
| 14 | 3.194745000  | -0.849409000 | -1.365573000 |
| 6  | 1.005099000  | 0.159088000  | 2.811265000  |
| 1  | 0.055879000  | -0.341949000 | 2.610048000  |
| 1  | 1.289202000  | -0.057337000 | 3.845554000  |
| 1  | 0.828017000  | 1.235537000  | 2.734946000  |
| 6  | 3.901533000  | 0.596284000  | 2.264719000  |
| 1  | 4.141311000  | 0.285015000  | 3.285673000  |
| 1  | 4.788601000  | 0.435964000  | 1.650315000  |
| 1  | 3.694909000  | 1.668448000  | 2.292893000  |
| 6  | 5.002867000  | -0.637480000 | -0.916348000 |
| 1  | 5.624624000  | -1.005798000 | -1.737067000 |

|    |              |              |              |
|----|--------------|--------------|--------------|
| 1  | 5.245435000  | 0.418356000  | -0.766214000 |
| 1  | 5.286988000  | -1.183026000 | -0.013814000 |
| 6  | 2.810158000  | -2.679852000 | -1.532325000 |
| 1  | 3.512045000  | -3.138939000 | -2.233837000 |
| 1  | 2.885007000  | -3.220594000 | -0.586683000 |
| 1  | 1.804624000  | -2.837906000 | -1.934432000 |
| 6  | 2.775442000  | -2.193445000 | 2.019436000  |
| 1  | 3.713478000  | -2.506452000 | 1.554085000  |
| 1  | 2.886691000  | -2.330330000 | 3.098904000  |
| 1  | 1.990324000  | -2.872086000 | 1.679721000  |
| 6  | 2.976096000  | -0.080801000 | -3.063364000 |
| 1  | 1.926254000  | -0.017618000 | -3.359534000 |
| 1  | 3.404367000  | 0.922778000  | -3.114045000 |
| 1  | 3.495973000  | -0.697215000 | -3.801913000 |
| 32 | 0.191729000  | -0.563863000 | -0.541143000 |
| 6  | -1.923892000 | 1.302511000  | -0.263071000 |
| 6  | -2.374122000 | 1.812503000  | -1.476904000 |
| 6  | -2.857415000 | 0.996513000  | 0.721567000  |
| 6  | -3.725882000 | 2.016071000  | -1.697722000 |
| 1  | -1.642169000 | 2.048986000  | -2.243406000 |
| 6  | -4.207898000 | 1.194211000  | 0.498633000  |
| 1  | -2.502052000 | 0.605006000  | 1.669318000  |
| 6  | -4.648493000 | 1.705791000  | -0.711887000 |
| 1  | -4.060662000 | 2.415459000  | -2.648514000 |
| 1  | -4.921256000 | 0.942842000  | 1.275526000  |
| 1  | -5.706962000 | 1.858683000  | -0.886798000 |
| 1  | -0.102464000 | -0.747096000 | -2.060997000 |
| 6  | -0.549943000 | -2.166335000 | 0.348511000  |
| 1  | -0.081888000 | -2.999995000 | -0.186762000 |
| 1  | -0.196524000 | -2.205673000 | 1.379582000  |
| 6  | -2.037165000 | -2.264872000 | 0.298752000  |
| 6  | -2.784652000 | -2.237745000 | 1.471057000  |
| 6  | -2.717092000 | -2.372352000 | -0.912687000 |
| 6  | -4.166817000 | -2.308035000 | 1.439451000  |
| 1  | -2.268416000 | -2.155445000 | 2.423706000  |
| 6  | -4.098234000 | -2.436226000 | -0.947936000 |
| 1  | -2.152166000 | -2.400264000 | -1.839926000 |
| 6  | -4.830456000 | -2.403781000 | 0.228399000  |
| 1  | -4.727943000 | -2.286291000 | 2.367118000  |
| 1  | -4.607188000 | -2.513730000 | -1.902037000 |

|   |              |              |             |
|---|--------------|--------------|-------------|
| 1 | -5.912514000 | -2.453145000 | 0.199325000 |
|---|--------------|--------------|-------------|

**4GeP<sup>C-H</sup>** (T.E.= -3899.350210)

|    |              |              |              |
|----|--------------|--------------|--------------|
| 6  | -1.688893000 | 0.556763000  | 1.599756000  |
| 6  | -2.007896000 | 0.067223000  | 0.145689000  |
| 1  | -2.160804000 | 1.527244000  | 1.799541000  |
| 1  | -2.117007000 | -0.113235000 | 2.354954000  |
| 7  | 0.823793000  | 0.741948000  | 0.370113000  |
| 14 | -2.959350000 | 1.461994000  | -0.707679000 |
| 14 | -2.912773000 | -1.579554000 | 0.212724000  |
| 6  | -1.892270000 | 3.007576000  | -0.761967000 |
| 1  | -0.977399000 | 2.885590000  | -1.345288000 |
| 1  | -2.470499000 | 3.816653000  | -1.217423000 |
| 1  | -1.607575000 | 3.336399000  | 0.240949000  |
| 6  | -4.511073000 | 1.937889000  | 0.233959000  |
| 1  | -4.888002000 | 2.877998000  | -0.178977000 |
| 1  | -5.299830000 | 1.191501000  | 0.133288000  |
| 1  | -4.331031000 | 2.097043000  | 1.299317000  |
| 6  | -4.633581000 | -1.425442000 | 0.941985000  |
| 1  | -5.340261000 | -0.974904000 | 0.241901000  |
| 1  | -5.004654000 | -2.423940000 | 1.189948000  |
| 1  | -4.638894000 | -0.832661000 | 1.860095000  |
| 6  | -3.091006000 | -2.354160000 | -1.488627000 |
| 1  | -3.356235000 | -3.409317000 | -1.380450000 |
| 1  | -3.890367000 | -1.872652000 | -2.055487000 |
| 1  | -2.183079000 | -2.306534000 | -2.093922000 |
| 6  | -3.482111000 | 1.012091000  | -2.451310000 |
| 1  | -4.324531000 | 0.316027000  | -2.444019000 |
| 1  | -3.810364000 | 1.915353000  | -2.972716000 |
| 1  | -2.678017000 | 0.563593000  | -3.038728000 |
| 6  | -1.988349000 | -2.761004000 | 1.348309000  |
| 1  | -0.917638000 | -2.819273000 | 1.141799000  |
| 1  | -2.106857000 | -2.474829000 | 2.396383000  |
| 1  | -2.402829000 | -3.766936000 | 1.238218000  |
| 14 | 0.149961000  | 0.780646000  | 1.971417000  |
| 6  | 0.706734000  | -0.602591000 | 3.103354000  |
| 1  | 0.506766000  | -1.578757000 | 2.653815000  |
| 1  | 1.770738000  | -0.556709000 | 3.344740000  |
| 1  | 0.148268000  | -0.550001000 | 4.042852000  |
| 6  | 0.486491000  | 2.424988000  | 2.784858000  |

|    |              |              |              |
|----|--------------|--------------|--------------|
| 1  | 0.189668000  | 3.245325000  | 2.126427000  |
| 1  | -0.082730000 | 2.509186000  | 3.714115000  |
| 1  | 1.542904000  | 2.553859000  | 3.027847000  |
| 32 | -0.302982000 | -0.099269000 | -0.851492000 |
| 6  | 2.090284000  | 1.228726000  | 0.025038000  |
| 6  | 2.312385000  | 1.865859000  | -1.199201000 |
| 6  | 3.173139000  | 1.113203000  | 0.899352000  |
| 6  | 3.562447000  | 2.348080000  | -1.537413000 |
| 1  | 1.485858000  | 1.983209000  | -1.891547000 |
| 6  | 4.419602000  | 1.607381000  | 0.561724000  |
| 1  | 3.039505000  | 0.597182000  | 1.844232000  |
| 6  | 4.628489000  | 2.223691000  | -0.660909000 |
| 1  | 3.701589000  | 2.835785000  | -2.496086000 |
| 1  | 5.241397000  | 1.492380000  | 1.260082000  |
| 1  | 5.607704000  | 2.603762000  | -0.926148000 |
| 1  | -0.329924000 | 0.680744000  | -2.192531000 |
| 6  | 0.456966000  | -1.892086000 | -1.303824000 |
| 1  | -0.146419000 | -2.674836000 | -0.843593000 |
| 1  | 0.354173000  | -1.985255000 | -2.387894000 |
| 6  | 1.880337000  | -2.000041000 | -0.882389000 |
| 6  | 2.218376000  | -2.562767000 | 0.344295000  |
| 6  | 2.905204000  | -1.492787000 | -1.676363000 |
| 6  | 3.534762000  | -2.608898000 | 0.770000000  |
| 1  | 1.434245000  | -2.974980000 | 0.973286000  |
| 6  | 4.222668000  | -1.542422000 | -1.258206000 |
| 1  | 2.658447000  | -1.040736000 | -2.633450000 |
| 6  | 4.542993000  | -2.096013000 | -0.029142000 |
| 1  | 3.772851000  | -3.049833000 | 1.731768000  |
| 1  | 5.001939000  | -1.128454000 | -1.888341000 |
| 1  | 5.573866000  | -2.126780000 | 0.303728000  |

**5GeP<sup>C-H</sup>** (T.E.= -3643.406827)

|    |              |              |              |
|----|--------------|--------------|--------------|
| 6  | -1.731910000 | 1.378038000  | -1.107232000 |
| 6  | -2.004816000 | 0.173130000  | -0.175399000 |
| 1  | -1.829464000 | 1.106303000  | -2.167189000 |
| 1  | -2.449772000 | 2.192285000  | -0.963438000 |
| 7  | 0.565580000  | 1.171329000  | -0.389040000 |
| 14 | -3.028534000 | -1.119166000 | -1.091264000 |
| 14 | -2.752176000 | 0.819657000  | 1.446011000  |
| 6  | -2.087908000 | -1.757087000 | -2.587128000 |

|    |              |              |              |
|----|--------------|--------------|--------------|
| 1  | -1.378904000 | -2.540615000 | -2.314276000 |
| 1  | -2.798388000 | -2.191991000 | -3.294744000 |
| 1  | -1.537471000 | -0.975097000 | -3.116513000 |
| 6  | -4.620150000 | -0.367515000 | -1.731406000 |
| 1  | -5.085696000 | -1.058439000 | -2.438980000 |
| 1  | -5.338731000 | -0.171579000 | -0.934991000 |
| 1  | -4.440584000 | 0.572385000  | -2.259538000 |
| 6  | -4.479782000 | 1.495147000  | 1.185066000  |
| 1  | -5.211662000 | 0.695836000  | 1.050470000  |
| 1  | -4.769839000 | 2.061036000  | 2.074768000  |
| 1  | -4.550259000 | 2.169441000  | 0.328833000  |
| 6  | -2.860493000 | -0.495101000 | 2.776560000  |
| 1  | -3.127405000 | -0.005849000 | 3.717586000  |
| 1  | -3.634468000 | -1.233559000 | 2.561633000  |
| 1  | -1.920340000 | -1.025527000 | 2.940473000  |
| 6  | -3.418130000 | -2.579758000 | 0.012658000  |
| 1  | -4.202724000 | -2.347003000 | 0.735679000  |
| 1  | -3.766637000 | -3.419692000 | -0.593490000 |
| 1  | -2.538578000 | -2.915985000 | 0.569857000  |
| 6  | -1.694557000 | 2.230265000  | 2.086043000  |
| 1  | -0.661940000 | 1.935736000  | 2.288277000  |
| 1  | -1.669230000 | 3.073150000  | 1.390960000  |
| 1  | -2.125137000 | 2.591583000  | 3.023930000  |
| 6  | 1.930502000  | 1.527471000  | -0.275176000 |
| 6  | 2.638756000  | 2.012616000  | -1.369341000 |
| 6  | 2.589900000  | 1.344371000  | 0.934132000  |
| 6  | 3.984340000  | 2.305852000  | -1.248169000 |
| 1  | 2.129417000  | 2.154640000  | -2.313703000 |
| 6  | 3.939507000  | 1.627727000  | 1.045712000  |
| 1  | 2.040635000  | 0.966709000  | 1.790426000  |
| 6  | 4.642135000  | 2.113615000  | -0.043262000 |
| 1  | 4.526223000  | 2.683448000  | -2.107767000 |
| 1  | 4.442361000  | 1.464456000  | 1.992006000  |
| 1  | 5.698567000  | 2.338233000  | 0.044396000  |
| 6  | -0.347284000 | 1.995497000  | -0.993843000 |
| 8  | -0.111590000 | 3.099649000  | -1.434408000 |
| 32 | -0.188188000 | -0.428079000 | 0.257940000  |
| 1  | 0.113390000  | -0.551970000 | 1.770315000  |
| 6  | 0.712425000  | -1.937144000 | -0.634898000 |
| 1  | 0.648706000  | -1.776593000 | -1.712247000 |



|   |             |              |              |
|---|-------------|--------------|--------------|
| 1 | 0.152586000 | -2.844034000 | -0.390026000 |
| 6 | 2.128190000 | -2.022850000 | -0.175951000 |
| 6 | 3.160948000 | -1.521025000 | -0.961439000 |
| 6 | 2.445082000 | -2.563021000 | 1.067791000  |
| 6 | 4.470936000 | -1.556851000 | -0.519197000 |
| 1 | 2.927705000 | -1.085913000 | -1.928843000 |
| 6 | 3.754474000 | -2.595949000 | 1.514297000  |
| 1 | 1.650702000 | -2.964156000 | 1.691214000  |
| 6 | 4.773283000 | -2.091407000 | 0.722504000  |
| 1 | 5.260087000 | -1.159580000 | -1.147152000 |
| 1 | 3.980778000 | -3.022057000 | 2.485132000  |
| 1 | 5.799009000 | -2.116594000 | 1.071016000  |

**8GeP<sup>C-H</sup>** (T.E.= -3212.011251)

|    |              |              |              |
|----|--------------|--------------|--------------|
| 6  | -0.607406000 | -2.215066000 | 0.943997000  |
| 6  | -1.921126000 | -1.499476000 | 1.225862000  |
| 6  | -2.272261000 | -0.653133000 | 0.014452000  |
| 1  | -0.188633000 | -2.614413000 | 1.876114000  |
| 1  | -0.793128000 | -3.071591000 | 0.276236000  |
| 1  | -1.796561000 | -0.902166000 | 2.146469000  |
| 1  | -2.689524000 | -2.249883000 | 1.448230000  |
| 32 | -0.620007000 | 0.122914000  | -0.484170000 |
| 7  | 0.323906000  | -1.282383000 | 0.329794000  |
| 15 | -3.757150000 | 0.093950000  | -0.141823000 |
| 6  | -5.140597000 | -1.069287000 | -0.162045000 |
| 1  | -5.123376000 | -1.660711000 | 0.755305000  |
| 1  | -6.095729000 | -0.544571000 | -0.223162000 |
| 1  | -5.031281000 | -1.742888000 | -1.011899000 |
| 6  | -3.852235000 | 1.034034000  | -1.673497000 |
| 1  | -3.127936000 | 1.850648000  | -1.650037000 |
| 1  | -3.625316000 | 0.382122000  | -2.517069000 |
| 1  | -4.850327000 | 1.457635000  | -1.794610000 |
| 6  | -4.272294000 | 1.280192000  | 1.141563000  |
| 1  | -5.281072000 | 1.663511000  | 0.972452000  |
| 1  | -4.240560000 | 0.781302000  | 2.112880000  |
| 1  | -3.565690000 | 2.112391000  | 1.161782000  |
| 6  | 1.586240000  | -1.716450000 | -0.012277000 |
| 6  | 2.060981000  | -2.989013000 | 0.338751000  |
| 6  | 2.461477000  | -0.883772000 | -0.728154000 |
| 6  | 3.342571000  | -3.389247000 | -0.001133000 |

|   |              |              |              |
|---|--------------|--------------|--------------|
| 1 | 1.425426000  | -3.675239000 | 0.883099000  |
| 6 | 3.733748000  | -1.295210000 | -1.061573000 |
| 1 | 2.139020000  | 0.112059000  | -1.014404000 |
| 6 | 4.194017000  | -2.554422000 | -0.701628000 |
| 1 | 3.674964000  | -4.380404000 | 0.289732000  |
| 1 | 4.376530000  | -0.614470000 | -1.609543000 |
| 1 | 5.194914000  | -2.875368000 | -0.963648000 |
| 1 | -0.244706000 | 0.286427000  | -1.980420000 |
| 6 | -0.189965000 | 1.824953000  | 0.454439000  |
| 1 | -0.563870000 | 1.681815000  | 1.472550000  |
| 1 | -0.796169000 | 2.599556000  | -0.026416000 |
| 6 | 1.251940000  | 2.169050000  | 0.441353000  |
| 6 | 2.092071000  | 1.757432000  | 1.473240000  |
| 6 | 1.819091000  | 2.844085000  | -0.637727000 |
| 6 | 3.451556000  | 2.005891000  | 1.426786000  |
| 1 | 1.666210000  | 1.217899000  | 2.313970000  |
| 6 | 3.180081000  | 3.092704000  | -0.687210000 |
| 1 | 1.178612000  | 3.170241000  | -1.452951000 |
| 6 | 4.004043000  | 2.673092000  | 0.344916000  |
| 1 | 4.086749000  | 1.669549000  | 2.238419000  |
| 1 | 3.600087000  | 3.618214000  | -1.537670000 |
| 1 | 5.069933000  | 2.864368000  | 0.306115000  |

**9GeP<sup>C-H</sup>** (T.E.= -3210.824078)

|    |              |              |              |
|----|--------------|--------------|--------------|
| 6  | -0.751182000 | 2.125066000  | 0.975955000  |
| 6  | -2.023784000 | 1.699329000  | 0.890970000  |
| 6  | -2.291069000 | 0.477023000  | 0.151399000  |
| 7  | 0.235504000  | 1.348177000  | 0.343967000  |
| 15 | -3.820208000 | -0.139685000 | -0.133845000 |
| 6  | -4.796730000 | -0.492193000 | 1.350245000  |
| 1  | -4.878152000 | 0.420052000  | 1.944649000  |
| 1  | -5.800339000 | -0.840821000 | 1.098259000  |
| 1  | -4.280358000 | -1.245451000 | 1.946219000  |
| 6  | -3.731480000 | -1.686853000 | -1.044940000 |
| 1  | -4.736817000 | -2.053342000 | -1.257162000 |
| 1  | -3.202718000 | -1.528554000 | -1.986291000 |
| 1  | -3.199827000 | -2.434126000 | -0.454233000 |
| 6  | -4.927749000 | 0.931103000  | -1.087048000 |
| 1  | -4.501861000 | 1.092317000  | -2.077882000 |
| 1  | -5.927881000 | 0.502104000  | -1.177258000 |

|    |              |              |              |
|----|--------------|--------------|--------------|
| 1  | -4.997283000 | 1.897319000  | -0.582847000 |
| 32 | -0.588464000 | -0.208480000 | -0.328389000 |
| 6  | 1.487876000  | 1.834669000  | 0.020013000  |
| 6  | 2.436854000  | 0.997328000  | -0.582930000 |
| 6  | 1.868603000  | 3.161513000  | 0.267252000  |
| 6  | 3.697535000  | 1.455838000  | -0.905429000 |
| 1  | 2.187637000  | -0.039794000 | -0.783936000 |
| 6  | 3.138356000  | 3.606599000  | -0.053265000 |
| 1  | 1.162386000  | 3.858651000  | 0.698874000  |
| 6  | 4.069030000  | 2.765580000  | -0.639179000 |
| 1  | 4.401361000  | 0.770334000  | -1.365786000 |
| 1  | 3.398309000  | 4.639240000  | 0.154966000  |
| 1  | 5.061050000  | 3.122766000  | -0.887548000 |
| 1  | -0.448714000 | 2.991683000  | 1.546558000  |
| 1  | -2.813209000 | 2.251420000  | 1.393840000  |
| 1  | -0.186569000 | -0.432714000 | -1.812099000 |
| 6  | -0.043767000 | -1.837573000 | 0.673141000  |
| 1  | -0.301590000 | -1.643609000 | 1.716607000  |
| 1  | -0.697947000 | -2.633400000 | 0.302485000  |
| 6  | 1.388530000  | -2.177958000 | 0.500339000  |
| 6  | 2.333517000  | -1.809601000 | 1.455001000  |
| 6  | 1.837807000  | -2.798984000 | -0.663833000 |
| 6  | 3.681243000  | -2.044820000 | 1.250316000  |
| 1  | 2.001149000  | -1.315138000 | 2.362934000  |
| 6  | 3.185867000  | -3.031601000 | -0.872737000 |
| 1  | 1.114024000  | -3.091254000 | -1.419751000 |
| 6  | 4.115307000  | -2.652865000 | 0.083194000  |
| 1  | 4.399300000  | -1.743791000 | 2.004642000  |
| 1  | 3.513344000  | -3.511978000 | -1.787966000 |
| 1  | 5.171557000  | -2.832126000 | -0.079709000 |

**<sup>14</sup>GeP<sup>C-H</sup>** (T.E.= -3406.183411)

|   |              |              |              |
|---|--------------|--------------|--------------|
| 6 | 2.416227000  | 1.008203000  | 0.146075000  |
| 6 | 2.187953000  | -0.388615000 | -0.056674000 |
| 7 | -0.085663000 | 1.076123000  | -0.324441000 |
| 6 | -1.441458000 | 1.422365000  | -0.212994000 |
| 6 | -1.917425000 | 2.079771000  | 0.921343000  |
| 6 | -3.259174000 | 2.391421000  | 1.044739000  |
| 6 | -4.156798000 | 2.039739000  | 0.048753000  |
| 6 | -3.695014000 | 1.377567000  | -1.077405000 |

|    |              |              |              |
|----|--------------|--------------|--------------|
| 6  | -2.351688000 | 1.076257000  | -1.210402000 |
| 1  | -1.212288000 | 2.341208000  | 1.704192000  |
| 1  | -3.609064000 | 2.905396000  | 1.933273000  |
| 1  | -5.209181000 | 2.276963000  | 0.151162000  |
| 1  | -4.387256000 | 1.089830000  | -1.860791000 |
| 1  | -1.988806000 | 0.565871000  | -2.097146000 |
| 5  | 1.073601000  | 1.896655000  | -0.084603000 |
| 7  | 1.083332000  | 3.307578000  | -0.135653000 |
| 6  | 2.182991000  | 4.118007000  | 0.341554000  |
| 1  | 2.579105000  | 4.746802000  | -0.465854000 |
| 1  | 1.841933000  | 4.791969000  | 1.138541000  |
| 1  | 2.984474000  | 3.485477000  | 0.715217000  |
| 6  | 0.015291000  | 4.122708000  | -0.663205000 |
| 1  | -0.523247000 | 4.661401000  | 0.128371000  |
| 1  | 0.430913000  | 4.874502000  | -1.344400000 |
| 1  | -0.708121000 | 3.530343000  | -1.219598000 |
| 15 | 3.534083000  | -1.424702000 | 0.044340000  |
| 6  | 4.324901000  | -1.474053000 | 1.662150000  |
| 1  | 5.187670000  | -2.142770000 | 1.648475000  |
| 1  | 4.642900000  | -0.463483000 | 1.918032000  |
| 1  | 3.603493000  | -1.820493000 | 2.403019000  |
| 6  | 4.855021000  | -1.034875000 | -1.115505000 |
| 1  | 5.703054000  | -1.707666000 | -0.975390000 |
| 1  | 4.476340000  | -1.126375000 | -2.133916000 |
| 1  | 5.161858000  | -0.004127000 | -0.938710000 |
| 6  | 3.040327000  | -3.117565000 | -0.313611000 |
| 1  | 2.316172000  | -3.456446000 | 0.429156000  |
| 1  | 2.583968000  | -3.165861000 | -1.303840000 |
| 1  | 3.908279000  | -3.778241000 | -0.288071000 |
| 8  | 3.544286000  | 1.459392000  | 0.429305000  |
| 32 | 0.363570000  | -0.737501000 | -0.429641000 |
| 1  | -0.005965000 | -1.324642000 | -1.819413000 |
| 6  | -0.627137000 | -1.762565000 | 0.941318000  |
| 1  | -0.513713000 | -1.208144000 | 1.876600000  |
| 1  | -0.082718000 | -2.706497000 | 1.049350000  |
| 6  | -2.057936000 | -2.001021000 | 0.607233000  |
| 6  | -3.075895000 | -1.330820000 | 1.278129000  |
| 6  | -2.413435000 | -2.878216000 | -0.416029000 |
| 6  | -4.402153000 | -1.516710000 | 0.930624000  |
| 1  | -2.818922000 | -0.639511000 | 2.074689000  |

|   |              |              |              |
|---|--------------|--------------|--------------|
| 6 | -3.738884000 | -3.068185000 | -0.764138000 |
| 1 | -1.632927000 | -3.414908000 | -0.948584000 |
| 6 | -4.741234000 | -2.384609000 | -0.093854000 |
| 1 | -5.175100000 | -0.972490000 | 1.461950000  |
| 1 | -3.991531000 | -3.754917000 | -1.564321000 |
| 1 | -5.779653000 | -2.529754000 | -0.367956000 |

Cartesian coordinates of the Si – H splitting product obtained for CAASi (1Si-5Si, 8Si-9Si and 14Si), CAAGes (1Ge-5Ge, 8Ge-9Ge and 14Ge) and IX, along with their total energies (in hartrees) including zero point vibrational correction.

**1Si<sup>PSi-H</sup>** (T.E.= -2038.040401)

|    |              |              |              |
|----|--------------|--------------|--------------|
| 6  | 0.038124000  | -1.891006000 | -1.298177000 |
| 6  | 1.188588000  | -0.928825000 | -1.583326000 |
| 6  | 1.733103000  | -0.321469000 | -0.263191000 |
| 1  | -0.619918000 | -1.945995000 | -2.175020000 |
| 1  | 0.407986000  | -2.913253000 | -1.123149000 |
| 1  | 0.810771000  | -0.131437000 | -2.233952000 |
| 1  | 1.972979000  | -1.437169000 | -2.154148000 |
| 7  | -0.680893000 | -1.412598000 | -0.130326000 |
| 14 | 0.092192000  | 0.004819000  | 0.588341000  |
| 14 | 2.659373000  | -1.624698000 | 0.764782000  |
| 14 | 2.756011000  | 1.223592000  | -0.584360000 |
| 6  | 2.852749000  | 2.294441000  | 0.955995000  |
| 1  | 3.620455000  | 1.938385000  | 1.644503000  |
| 1  | 3.106919000  | 3.321415000  | 0.679300000  |
| 1  | 1.907693000  | 2.327910000  | 1.505141000  |
| 6  | 2.012836000  | 2.224495000  | -1.992421000 |
| 1  | 0.941202000  | 2.409447000  | -1.899112000 |
| 1  | 2.511401000  | 3.197774000  | -2.028194000 |
| 1  | 2.187521000  | 1.732904000  | -2.952918000 |
| 6  | 4.501086000  | 0.840315000  | -1.157387000 |
| 1  | 4.997363000  | 1.775316000  | -1.432518000 |
| 1  | 5.112552000  | 0.351165000  | -0.396794000 |
| 1  | 4.488184000  | 0.203350000  | -2.046233000 |
| 6  | 3.640868000  | -0.824174000 | 2.146980000  |
| 1  | 4.072153000  | -1.615410000 | 2.766281000  |
| 1  | 4.461263000  | -0.197210000 | 1.791908000  |
| 1  | 3.000558000  | -0.214102000 | 2.789345000  |
| 6  | 1.559701000  | -2.899819000 | 1.599923000  |

|    |              |              |              |
|----|--------------|--------------|--------------|
| 1  | 0.871847000  | -2.461861000 | 2.326652000  |
| 1  | 0.968978000  | -3.490378000 | 0.896167000  |
| 1  | 2.215093000  | -3.588937000 | 2.141843000  |
| 6  | 3.825583000  | -2.597123000 | -0.339088000 |
| 1  | 4.525850000  | -1.965135000 | -0.887813000 |
| 1  | 4.407834000  | -3.282196000 | 0.283542000  |
| 1  | 3.278039000  | -3.204248000 | -1.064335000 |
| 6  | -1.799138000 | -2.090951000 | 0.308512000  |
| 6  | -2.370777000 | -3.142804000 | -0.418841000 |
| 6  | -2.398681000 | -1.749757000 | 1.529836000  |
| 6  | -3.496921000 | -3.798097000 | 0.050053000  |
| 1  | -1.936225000 | -3.452459000 | -1.360177000 |
| 6  | -3.521959000 | -2.408473000 | 1.983998000  |
| 1  | -1.961923000 | -0.962124000 | 2.134776000  |
| 6  | -4.087986000 | -3.439582000 | 1.248052000  |
| 1  | -3.915730000 | -4.606462000 | -0.539442000 |
| 1  | -3.957219000 | -2.115121000 | 2.933012000  |
| 1  | -4.969022000 | -3.956644000 | 1.607702000  |
| 1  | 0.215896000  | -0.117222000 | 2.070216000  |
| 14 | -1.317469000 | 1.837167000  | 0.047788000  |
| 6  | -2.758854000 | 1.728985000  | 1.271199000  |
| 1  | -3.348743000 | 0.841737000  | 1.011311000  |
| 1  | -2.328294000 | 1.513173000  | 2.256843000  |
| 6  | -0.520488000 | 3.547405000  | 0.207627000  |
| 1  | -0.583000000 | 3.826282000  | 1.266837000  |
| 1  | 0.546958000  | 3.480266000  | -0.014251000 |
| 6  | -1.931424000 | 1.472376000  | -1.706781000 |
| 1  | -1.146724000 | 1.742887000  | -2.423622000 |
| 1  | -2.020905000 | 0.380318000  | -1.768150000 |
| 6  | -1.145402000 | 4.627690000  | -0.664903000 |
| 1  | -2.210279000 | 4.756051000  | -0.457444000 |
| 1  | -0.664788000 | 5.597744000  | -0.515556000 |
| 1  | -1.051296000 | 4.379586000  | -1.725868000 |
| 6  | -3.652577000 | 2.958214000  | 1.369078000  |
| 1  | -3.082179000 | 3.848226000  | 1.647732000  |
| 1  | -4.153758000 | 3.178000000  | 0.423154000  |
| 1  | -4.432286000 | 2.828702000  | 2.124060000  |
| 6  | -3.256662000 | 2.105248000  | -2.107376000 |
| 1  | -3.219435000 | 3.196457000  | -2.075716000 |
| 1  | -3.549447000 | 1.819571000  | -3.120868000 |

1 -4.060911000 1.787114000 -1.439775000

**2SiP<sup>Si-H</sup>** (T.E.= -2036.843541)

6 -1.660753000 0.807139000 0.023585000  
6 -1.404994000 2.302355000 -0.027176000  
6 -0.130651000 2.705746000 -0.025455000  
1 -2.221555000 3.010484000 -0.120417000  
1 0.187641000 3.737621000 -0.127273000  
14 0.047930000 0.233299000 0.591285000  
7 0.852384000 1.718061000 0.042528000  
14 -2.009708000 0.296373000 -1.765036000  
14 -3.016085000 0.440626000 1.282234000  
6 -3.441208000 1.249008000 -2.511841000  
1 -3.455714000 1.053185000 -3.588058000  
1 -4.411349000 0.960106000 -2.107961000  
1 -3.320062000 2.326572000 -2.378418000  
6 -2.416627000 -1.532693000 -1.890480000  
1 -2.458829000 -1.828382000 -2.942581000  
1 -1.682885000 -2.175274000 -1.396717000  
1 -3.394697000 -1.743843000 -1.449595000  
6 -0.546989000 0.712105000 -2.867580000  
1 -0.725184000 0.298330000 -3.864579000  
1 -0.462022000 1.797107000 -2.965737000  
1 0.415183000 0.339184000 -2.515024000  
6 -3.119791000 -1.380168000 1.706061000  
1 -3.968662000 -1.540093000 2.376591000  
1 -3.271645000 -2.004340000 0.822801000  
1 -2.224904000 -1.732405000 2.223406000  
6 -2.691688000 1.400608000 2.855885000  
1 -1.714861000 1.168719000 3.285101000  
1 -2.730688000 2.477027000 2.674559000  
1 -3.456842000 1.155070000 3.597383000  
6 -4.701971000 0.968028000 0.652454000  
1 -5.079920000 0.292767000 -0.118729000  
1 -5.410990000 0.949144000 1.484836000  
1 -4.695469000 1.980810000 0.242399000  
6 2.213233000 2.042125000 0.049087000  
6 3.111961000 1.264650000 -0.678499000  
6 2.702740000 3.138755000 0.757615000  
6 4.462713000 1.559896000 -0.680096000

|    |              |              |              |
|----|--------------|--------------|--------------|
| 1  | 2.731287000  | 0.436418000  | -1.267892000 |
| 6  | 4.052541000  | 3.440510000  | 0.737553000  |
| 1  | 2.017158000  | 3.743733000  | 1.340662000  |
| 6  | 4.941983000  | 2.651427000  | 0.026115000  |
| 1  | 5.143422000  | 0.941324000  | -1.254194000 |
| 1  | 4.414642000  | 4.295401000  | 1.297506000  |
| 1  | 5.999021000  | 2.888231000  | 0.018459000  |
| 1  | 0.100405000  | 0.269051000  | 2.091590000  |
| 14 | 1.057287000  | -1.858393000 | 0.126601000  |
| 6  | 2.737041000  | -1.826378000 | 0.986722000  |
| 1  | 3.335895000  | -1.009154000 | 0.574174000  |
| 1  | 2.572596000  | -1.565253000 | 2.038483000  |
| 6  | -0.005358000 | -3.162765000 | 0.990598000  |
| 1  | -1.038988000 | -3.063471000 | 0.641766000  |
| 1  | 0.325625000  | -4.147561000 | 0.642821000  |
| 6  | 1.263228000  | -2.300977000 | -1.703628000 |
| 1  | 0.488701000  | -1.802630000 | -2.292524000 |
| 1  | 2.213422000  | -1.864923000 | -2.037087000 |
| 6  | 3.495822000  | -3.141296000 | 0.868115000  |
| 1  | 4.446361000  | -3.114418000 | 1.406361000  |
| 1  | 2.921969000  | -3.983187000 | 1.266428000  |
| 1  | 3.722409000  | -3.372690000 | -0.176404000 |
| 6  | 0.049465000  | -3.108327000 | 2.511700000  |
| 1  | 1.033435000  | -3.400542000 | 2.885163000  |
| 1  | -0.147226000 | -2.103552000 | 2.897881000  |
| 1  | -0.681415000 | -3.780503000 | 2.968070000  |
| 6  | 1.234628000  | -3.793489000 | -2.006494000 |
| 1  | 0.255665000  | -4.221920000 | -1.776986000 |
| 1  | 1.435744000  | -3.992485000 | -3.061714000 |
| 1  | 1.972640000  | -4.349462000 | -1.423237000 |

**3SiP<sup>Si-H</sup>** (T.E.= -2158.148448)

|    |              |              |              |
|----|--------------|--------------|--------------|
| 6  | 1.556992000  | -0.694339000 | -1.330621000 |
| 6  | 1.853547000  | 0.135887000  | -0.034226000 |
| 1  | 1.161361000  | -0.037934000 | -2.119466000 |
| 1  | 2.479339000  | -1.116610000 | -1.741821000 |
| 14 | 0.131928000  | 0.246426000  | 0.710978000  |
| 7  | -0.462699000 | -1.279880000 | 0.041594000  |
| 5  | 0.437050000  | -1.769413000 | -0.978809000 |
| 7  | 0.385719000  | -3.059430000 | -1.554051000 |



|    |              |              |              |
|----|--------------|--------------|--------------|
| 6  | 1.193059000  | -3.439118000 | -2.688466000 |
| 1  | 1.980663000  | -4.149351000 | -2.403008000 |
| 1  | 0.577317000  | -3.927302000 | -3.452795000 |
| 1  | 1.661711000  | -2.570945000 | -3.147743000 |
| 6  | -0.354555000 | -4.179121000 | -1.022788000 |
| 1  | 0.311408000  | -5.044149000 | -0.917791000 |
| 1  | -0.763591000 | -3.954980000 | -0.039244000 |
| 1  | -1.182682000 | -4.479144000 | -1.677711000 |
| 14 | 2.614990000  | 1.808971000  | -0.417487000 |
| 14 | 2.916607000  | -0.929658000 | 1.119063000  |
| 6  | 1.781786000  | 2.577780000  | -1.917291000 |
| 1  | 0.690924000  | 2.546085000  | -1.890130000 |
| 1  | 2.081517000  | 3.627396000  | -1.991427000 |
| 1  | 2.106943000  | 2.079058000  | -2.833716000 |
| 6  | 4.427567000  | 1.696156000  | -0.890418000 |
| 1  | 4.764961000  | 2.670309000  | -1.256236000 |
| 1  | 5.070818000  | 1.414124000  | -0.054520000 |
| 1  | 4.575365000  | 0.969861000  | -1.695044000 |
| 6  | 4.401840000  | -1.644793000 | 0.215064000  |
| 1  | 5.107894000  | -0.888721000 | -0.134437000 |
| 1  | 4.932848000  | -2.303690000 | 0.908905000  |
| 1  | 4.101260000  | -2.253967000 | -0.643688000 |
| 6  | 3.528663000  | 0.048486000  | 2.597399000  |
| 1  | 4.003338000  | -0.636833000 | 3.304786000  |
| 1  | 4.269403000  | 0.801989000  | 2.322947000  |
| 1  | 2.709678000  | 0.551320000  | 3.117212000  |
| 6  | 2.466483000  | 2.973111000  | 1.050850000  |
| 1  | 3.227769000  | 2.762659000  | 1.803607000  |
| 1  | 2.602470000  | 4.007355000  | 0.722407000  |
| 1  | 1.491807000  | 2.910412000  | 1.541871000  |
| 6  | 2.023376000  | -2.444494000 | 1.789432000  |
| 1  | 1.116890000  | -2.212650000 | 2.352414000  |
| 1  | 1.759910000  | -3.146935000 | 0.993058000  |
| 1  | 2.717004000  | -2.957106000 | 2.463272000  |
| 6  | -1.760273000 | -1.736915000 | 0.330956000  |
| 6  | -2.695356000 | -1.935029000 | -0.684813000 |
| 6  | -2.159481000 | -1.954743000 | 1.648237000  |
| 6  | -3.984214000 | -2.340408000 | -0.390755000 |
| 1  | -2.397020000 | -1.762740000 | -1.714065000 |
| 6  | -3.451831000 | -2.355969000 | 1.939986000  |

|    |              |              |              |
|----|--------------|--------------|--------------|
| 1  | -1.438365000 | -1.806502000 | 2.445473000  |
| 6  | -4.372529000 | -2.549921000 | 0.923782000  |
| 1  | -4.695561000 | -2.484333000 | -1.196274000 |
| 1  | -3.740003000 | -2.518499000 | 2.972314000  |
| 1  | -5.384732000 | -2.860734000 | 1.152935000  |
| 1  | 0.177878000  | 0.195086000  | 2.205154000  |
| 14 | -1.510471000 | 1.839084000  | 0.076175000  |
| 6  | -2.949366000 | 1.491868000  | 1.260903000  |
| 1  | -3.390388000 | 0.527806000  | 0.981870000  |
| 1  | -2.502543000 | 1.324118000  | 2.248726000  |
| 6  | -1.019595000 | 3.662846000  | 0.215087000  |
| 1  | -1.051722000 | 3.944855000  | 1.274210000  |
| 1  | 0.024161000  | 3.778393000  | -0.087780000 |
| 6  | -1.971309000 | 1.432854000  | -1.721077000 |
| 1  | -1.400183000 | 2.098667000  | -2.378108000 |
| 1  | -1.602353000 | 0.423798000  | -1.937332000 |
| 6  | -3.453289000 | 1.515230000  | -2.057260000 |
| 1  | -3.854027000 | 2.516119000  | -1.877848000 |
| 1  | -3.645642000 | 1.271165000  | -3.105329000 |
| 1  | -4.035240000 | 0.815664000  | -1.450643000 |
| 6  | -4.030326000 | 2.558447000  | 1.366016000  |
| 1  | -4.808651000 | 2.270602000  | 2.077445000  |
| 1  | -3.622256000 | 3.513690000  | 1.706075000  |
| 1  | -4.520495000 | 2.738899000  | 0.405994000  |
| 6  | -1.885038000 | 4.602020000  | -0.615773000 |
| 1  | -1.838726000 | 4.344522000  | -1.677724000 |
| 1  | -2.936281000 | 4.563623000  | -0.320858000 |
| 1  | -1.560222000 | 5.641242000  | -0.522259000 |

**4SiP<sup>Si-H</sup>** (T.E.= -2368.052688)

|    |              |              |              |
|----|--------------|--------------|--------------|
| 6  | -1.926966000 | -1.285932000 | 1.207165000  |
| 6  | -1.927934000 | -0.213261000 | 0.058696000  |
| 1  | -2.186579000 | -0.832879000 | 2.172242000  |
| 1  | -2.703339000 | -2.044593000 | 1.047976000  |
| 14 | -0.148207000 | 0.021785000  | -0.567901000 |
| 7  | 0.668434000  | -1.315349000 | 0.217473000  |
| 14 | -2.685450000 | 1.353245000  | 0.772421000  |
| 14 | -2.893699000 | -0.931213000 | -1.402241000 |
| 6  | -1.587227000 | 2.008092000  | 2.150829000  |
| 1  | -0.683084000 | 2.489945000  | 1.776917000  |

|    |              |              |              |
|----|--------------|--------------|--------------|
| 1  | -2.138449000 | 2.753501000  | 2.730681000  |
| 1  | -1.278814000 | 1.218462000  | 2.842784000  |
| 6  | -4.355934000 | 1.033170000  | 1.566918000  |
| 1  | -4.650438000 | 1.923718000  | 2.129416000  |
| 1  | -5.134671000 | 0.833115000  | 0.830086000  |
| 1  | -4.332043000 | 0.195008000  | 2.267006000  |
| 6  | -4.690110000 | -1.270962000 | -0.969065000 |
| 1  | -5.286647000 | -0.356130000 | -0.966019000 |
| 1  | -5.107105000 | -1.931238000 | -1.735288000 |
| 1  | -4.819380000 | -1.763841000 | -0.003119000 |
| 6  | -2.931248000 | 0.175805000  | -2.915776000 |
| 1  | -3.417565000 | -0.375751000 | -3.725962000 |
| 1  | -3.512955000 | 1.083040000  | -2.742735000 |
| 1  | -1.939396000 | 0.468354000  | -3.263377000 |
| 6  | -2.927790000 | 2.683495000  | -0.528180000 |
| 1  | -3.851816000 | 2.508551000  | -1.085338000 |
| 1  | -3.009371000 | 3.665850000  | -0.054924000 |
| 1  | -2.108886000 | 2.727001000  | -1.250616000 |
| 6  | -2.156388000 | -2.589082000 | -1.889128000 |
| 1  | -1.080314000 | -2.543409000 | -2.070635000 |
| 1  | -2.338355000 | -3.347144000 | -1.123034000 |
| 1  | -2.639047000 | -2.932548000 | -2.808211000 |
| 14 | -0.256046000 | -2.127003000 | 1.442495000  |
| 6  | -0.229952000 | -3.965684000 | 1.131106000  |
| 1  | -0.526257000 | -4.196141000 | 0.105458000  |
| 1  | 0.780414000  | -4.355755000 | 1.282065000  |
| 1  | -0.896712000 | -4.497888000 | 1.813428000  |
| 6  | 0.333060000  | -1.813306000 | 3.190340000  |
| 1  | 0.409569000  | -0.740631000 | 3.391832000  |
| 1  | -0.384863000 | -2.233655000 | 3.900545000  |
| 1  | 1.303271000  | -2.271905000 | 3.393974000  |
| 6  | 1.975169000  | -1.706028000 | -0.139688000 |
| 6  | 2.262719000  | -2.107666000 | -1.444352000 |
| 6  | 3.012502000  | -1.702413000 | 0.792273000  |
| 6  | 3.545464000  | -2.476357000 | -1.806491000 |
| 1  | 1.461907000  | -2.122248000 | -2.175943000 |
| 6  | 4.293909000  | -2.080299000 | 0.428722000  |
| 1  | 2.810341000  | -1.376583000 | 1.807032000  |
| 6  | 4.570016000  | -2.463537000 | -0.873186000 |
| 1  | 3.744836000  | -2.781125000 | -2.827684000 |

|    |              |              |              |
|----|--------------|--------------|--------------|
| 1  | 5.084803000  | -2.063485000 | 1.170164000  |
| 1  | 5.574630000  | -2.752421000 | -1.157892000 |
| 1  | -0.121023000 | -0.204531000 | -2.046084000 |
| 14 | 1.311149000  | 1.868980000  | -0.235013000 |
| 6  | 2.642613000  | 1.527863000  | -1.543536000 |
| 1  | 3.200659000  | 0.637125000  | -1.230267000 |
| 1  | 2.112351000  | 1.225656000  | -2.455100000 |
| 6  | 2.018119000  | 1.713174000  | 1.520799000  |
| 1  | 1.485175000  | 2.414463000  | 2.171827000  |
| 1  | 1.752994000  | 0.714975000  | 1.889045000  |
| 6  | 0.616183000  | 3.608169000  | -0.506976000 |
| 1  | 0.523648000  | 3.765032000  | -1.588399000 |
| 1  | -0.402719000 | 3.661913000  | -0.114573000 |
| 6  | 1.456131000  | 4.710064000  | 0.126383000  |
| 1  | 2.479154000  | 4.720406000  | -0.256724000 |
| 1  | 1.031762000  | 5.700736000  | -0.055021000 |
| 1  | 1.520605000  | 4.580531000  | 1.210213000  |
| 6  | 3.520202000  | 1.922482000  | 1.650366000  |
| 1  | 3.815739000  | 2.928040000  | 1.339093000  |
| 1  | 3.860076000  | 1.788281000  | 2.680803000  |
| 1  | 4.075153000  | 1.211451000  | 1.031635000  |
| 6  | 3.601845000  | 2.662977000  | -1.874964000 |
| 1  | 3.071319000  | 3.543009000  | -2.248307000 |
| 1  | 4.180750000  | 2.978800000  | -1.003806000 |
| 1  | 4.316887000  | 2.368686000  | -2.647647000 |

**5SiP<sup>Si-H</sup>** (T.E.= -2112.110007)

|    |              |              |              |
|----|--------------|--------------|--------------|
| 6  | -1.584193000 | -1.084049000 | 1.502637000  |
| 6  | -1.880027000 | -0.272377000 | 0.214486000  |
| 1  | -1.500266000 | -0.439754000 | 2.388718000  |
| 1  | -2.375890000 | -1.799385000 | 1.750989000  |
| 14 | -0.167323000 | -0.120524000 | -0.557112000 |
| 7  | 0.511799000  | -1.454509000 | 0.403813000  |
| 14 | -2.711766000 | 1.353695000  | 0.678760000  |
| 14 | -2.898133000 | -1.371959000 | -0.957539000 |
| 6  | -1.588133000 | 2.410853000  | 1.749944000  |
| 1  | -0.808282000 | 2.912547000  | 1.174600000  |
| 1  | -2.198154000 | 3.190520000  | 2.214847000  |
| 1  | -1.106888000 | 1.851476000  | 2.556071000  |
| 6  | -4.243790000 | 1.056398000  | 1.717069000  |

|    |              |              |              |
|----|--------------|--------------|--------------|
| 1  | -4.583258000 | 2.010834000  | 2.128121000  |
| 1  | -5.069832000 | 0.623168000  | 1.153242000  |
| 1  | -4.030002000 | 0.395297000  | 2.561168000  |
| 6  | -4.608810000 | -1.717354000 | -0.269258000 |
| 1  | -5.268019000 | -0.853818000 | -0.380186000 |
| 1  | -5.047894000 | -2.540886000 | -0.839377000 |
| 1  | -4.606015000 | -2.009936000 | 0.782863000  |
| 6  | -3.141815000 | -0.624037000 | -2.657739000 |
| 1  | -3.602729000 | -1.382142000 | -3.297603000 |
| 1  | -3.810054000 | 0.238227000  | -2.637302000 |
| 1  | -2.206302000 | -0.319218000 | -3.129907000 |
| 6  | -3.156798000 | 2.344648000  | -0.846606000 |
| 1  | -4.061390000 | 1.965528000  | -1.327213000 |
| 1  | -3.338045000 | 3.387653000  | -0.573865000 |
| 1  | -2.354080000 | 2.329979000  | -1.590179000 |
| 6  | -2.051905000 | -3.033082000 | -1.165924000 |
| 1  | -1.079906000 | -2.956141000 | -1.657059000 |
| 1  | -1.909492000 | -3.554786000 | -0.216702000 |
| 1  | -2.689652000 | -3.662851000 | -1.792769000 |
| 6  | 1.828386000  | -1.950975000 | 0.241920000  |
| 6  | 2.748683000  | -1.894916000 | 1.282622000  |
| 6  | 2.222310000  | -2.443988000 | -0.994285000 |
| 6  | 4.050457000  | -2.312775000 | 1.076174000  |
| 1  | 2.434162000  | -1.522614000 | 2.250454000  |
| 6  | 3.527518000  | -2.857969000 | -1.197085000 |
| 1  | 1.496395000  | -2.494891000 | -1.799071000 |
| 6  | 4.446752000  | -2.789852000 | -0.164095000 |
| 1  | 4.763245000  | -2.261514000 | 1.891062000  |
| 1  | 3.825568000  | -3.236208000 | -2.167935000 |
| 1  | 5.469489000  | -3.110915000 | -0.322054000 |
| 6  | -0.279907000 | -1.857742000 | 1.451715000  |
| 8  | 0.012861000  | -2.704345000 | 2.265157000  |
| 1  | -0.186916000 | -0.522441000 | -1.992626000 |
| 14 | 1.403784000  | 1.631910000  | -0.349673000 |
| 6  | 2.865967000  | 1.017576000  | -1.384984000 |
| 1  | 3.360521000  | 0.215895000  | -0.822974000 |
| 1  | 2.453769000  | 0.530525000  | -2.277021000 |
| 6  | 0.779799000  | 3.268123000  | -1.061665000 |
| 1  | 0.889426000  | 3.204617000  | -2.150645000 |
| 1  | -0.295953000 | 3.358276000  | -0.881299000 |

|   |             |             |              |
|---|-------------|-------------|--------------|
| 6 | 1.892045000 | 1.762971000 | 1.476946000  |
| 1 | 1.258570000 | 2.511811000 | 1.960759000  |
| 1 | 1.627867000 | 0.809285000 | 1.952042000  |
| 6 | 3.359828000 | 2.073257000 | 1.732487000  |
| 1 | 3.640130000 | 3.048290000 | 1.325601000  |
| 1 | 3.588222000 | 2.089857000 | 2.800915000  |
| 1 | 4.011643000 | 1.325953000 | 1.272416000  |
| 6 | 3.877659000 | 2.075955000 | -1.803689000 |
| 1 | 4.690394000 | 1.641214000 | -2.390866000 |
| 1 | 3.418071000 | 2.852694000 | -2.420281000 |
| 1 | 4.331535000 | 2.571605000 | -0.942190000 |
| 6 | 1.495750000 | 4.501496000 | -0.526897000 |
| 1 | 2.569540000 | 4.465874000 | -0.727343000 |
| 1 | 1.112352000 | 5.421009000 | -0.975610000 |
| 1 | 1.372115000 | 4.595016000 | 0.555544000  |

**8SiP<sup>Si-H</sup>** (T.E. = -1680.717651)

|    |              |              |              |
|----|--------------|--------------|--------------|
| 6  | -0.153375000 | -2.486491000 | -0.983908000 |
| 6  | -1.649028000 | -2.425205000 | -0.711857000 |
| 6  | -1.950750000 | -1.085044000 | -0.057994000 |
| 1  | 0.178775000  | -3.525066000 | -1.095215000 |
| 1  | 0.078959000  | -1.965826000 | -1.929203000 |
| 1  | -1.918878000 | -3.272847000 | -0.062524000 |
| 1  | -2.188063000 | -2.576617000 | -1.656555000 |
| 14 | -0.451361000 | -0.522710000 | 0.780650000  |
| 7  | 0.534352000  | -1.847946000 | 0.128237000  |
| 15 | -3.521685000 | -0.565188000 | 0.153687000  |
| 6  | -4.381474000 | 0.015818000  | -1.334708000 |
| 1  | -4.345026000 | -0.768498000 | -2.093525000 |
| 1  | -5.425048000 | 0.263753000  | -1.128845000 |
| 1  | -3.864176000 | 0.894232000  | -1.723444000 |
| 6  | -4.670794000 | -1.823715000 | 0.777358000  |
| 1  | -4.316843000 | -2.191007000 | 1.741472000  |
| 1  | -5.680786000 | -1.422787000 | 0.883392000  |
| 1  | -4.697833000 | -2.660310000 | 0.076073000  |
| 6  | -3.630690000 | 0.804225000  | 1.316603000  |
| 1  | -3.257373000 | 0.486721000  | 2.291261000  |
| 1  | -3.034147000 | 1.645643000  | 0.960547000  |
| 1  | -4.668321000 | 1.126922000  | 1.415545000  |
| 6  | 1.910873000  | -1.879616000 | 0.185716000  |

|    |              |              |              |
|----|--------------|--------------|--------------|
| 6  | 2.702291000  | -2.511717000 | -0.782354000 |
| 6  | 2.573654000  | -1.218744000 | 1.231757000  |
| 6  | 4.084255000  | -2.448175000 | -0.717251000 |
| 1  | 2.235938000  | -3.033269000 | -1.608550000 |
| 6  | 3.950320000  | -1.153712000 | 1.278680000  |
| 1  | 1.986664000  | -0.749043000 | 2.015932000  |
| 6  | 4.724358000  | -1.763120000 | 0.300812000  |
| 1  | 4.668147000  | -2.938103000 | -1.489144000 |
| 1  | 4.426235000  | -0.621141000 | 2.095356000  |
| 1  | 5.805406000  | -1.710069000 | 0.338281000  |
| 1  | -0.435209000 | -0.580533000 | 2.281446000  |
| 14 | 0.485143000  | 1.532422000  | 0.073740000  |
| 6  | 1.510978000  | 1.159307000  | -1.475035000 |
| 1  | 1.976094000  | 0.175447000  | -1.344484000 |
| 1  | 0.809137000  | 1.045835000  | -2.311461000 |
| 6  | 2.587665000  | 2.183356000  | -1.806200000 |
| 1  | 3.306881000  | 2.272851000  | -0.986941000 |
| 1  | 3.153585000  | 1.906397000  | -2.699693000 |
| 1  | 2.169753000  | 3.178528000  | -1.980219000 |
| 6  | -0.917795000 | 2.721353000  | -0.400074000 |
| 1  | -1.692558000 | 2.104845000  | -0.874959000 |
| 1  | -1.364367000 | 3.112188000  | 0.523356000  |
| 6  | -0.549314000 | 3.868624000  | -1.330127000 |
| 1  | 0.212380000  | 4.520184000  | -0.895513000 |
| 1  | -0.152130000 | 3.497634000  | -2.278234000 |
| 1  | -1.413445000 | 4.495211000  | -1.567837000 |
| 6  | 1.555221000  | 2.288096000  | 1.443965000  |
| 1  | 2.513148000  | 1.753957000  | 1.436026000  |
| 1  | 1.084443000  | 2.020764000  | 2.398353000  |
| 6  | 1.789066000  | 3.791086000  | 1.392522000  |
| 1  | 2.403942000  | 4.136608000  | 2.228077000  |
| 1  | 2.296652000  | 4.092089000  | 0.472410000  |
| 1  | 0.847165000  | 4.344827000  | 1.436968000  |

**9SiP<sup>Si-H</sup>** (T.E.= -1679.530731)

|    |              |              |              |
|----|--------------|--------------|--------------|
| 6  | 0.035066000  | -2.614973000 | 0.582715000  |
| 6  | -1.280871000 | -2.367505000 | 0.681087000  |
| 6  | -1.789466000 | -1.235525000 | -0.084248000 |
| 14 | -0.328340000 | -0.463550000 | -0.867794000 |
| 7  | 0.754962000  | -1.741626000 | -0.257089000 |

|    |              |              |              |
|----|--------------|--------------|--------------|
| 15 | -3.404880000 | -0.793391000 | -0.074405000 |
| 6  | -4.544376000 | -2.166974000 | -0.367603000 |
| 1  | -4.373238000 | -2.938069000 | 0.385885000  |
| 1  | -5.582854000 | -1.836511000 | -0.303977000 |
| 1  | -4.349983000 | -2.595237000 | -1.350983000 |
| 6  | -3.752848000 | 0.439822000  | -1.334994000 |
| 1  | -4.821213000 | 0.658294000  | -1.362999000 |
| 1  | -3.212845000 | 1.360912000  | -1.109455000 |
| 1  | -3.431751000 | 0.069212000  | -2.309437000 |
| 6  | -4.047405000 | -0.089005000 | 1.470537000  |
| 1  | -3.516032000 | 0.836541000  | 1.698481000  |
| 1  | -5.120214000 | 0.108381000  | 1.413529000  |
| 1  | -3.855556000 | -0.799888000 | 2.277223000  |
| 6  | 2.134187000  | -1.689346000 | -0.289620000 |
| 6  | 2.944907000  | -2.282753000 | 0.686439000  |
| 6  | 2.767270000  | -0.986045000 | -1.322817000 |
| 6  | 4.321462000  | -2.168682000 | 0.621845000  |
| 1  | 2.490980000  | -2.812267000 | 1.515093000  |
| 6  | 4.142288000  | -0.870667000 | -1.370726000 |
| 1  | 2.160517000  | -0.543111000 | -2.107420000 |
| 6  | 4.936269000  | -1.461726000 | -0.399860000 |
| 1  | 4.923755000  | -2.633119000 | 1.395291000  |
| 1  | 4.598740000  | -0.317014000 | -2.184153000 |
| 1  | 6.015108000  | -1.375044000 | -0.440212000 |
| 1  | 0.545791000  | -3.457752000 | 1.027213000  |
| 1  | -1.924504000 | -3.016500000 | 1.267889000  |
| 1  | -0.357069000 | -0.389699000 | -2.365265000 |
| 14 | 0.370018000  | 1.558089000  | 0.128717000  |
| 6  | -1.040893000 | 2.809688000  | -0.024082000 |
| 1  | -1.943984000 | 2.349290000  | 0.397425000  |
| 1  | -0.832678000 | 3.680193000  | 0.608624000  |
| 6  | -1.279087000 | 3.247981000  | -1.462866000 |
| 1  | -2.154453000 | 3.894755000  | -1.567838000 |
| 1  | -0.421331000 | 3.800225000  | -1.855108000 |
| 1  | -1.424491000 | 2.390770000  | -2.129305000 |
| 6  | 1.944206000  | 2.342539000  | -0.568493000 |
| 1  | 2.781574000  | 1.708698000  | -0.253025000 |
| 1  | 1.914604000  | 2.259054000  | -1.661464000 |
| 6  | 2.183023000  | 3.790465000  | -0.162766000 |
| 1  | 3.130503000  | 4.171648000  | -0.552865000 |



|   |              |             |              |
|---|--------------|-------------|--------------|
| 1 | 1.395419000  | 4.450178000 | -0.535987000 |
| 1 | 2.209159000  | 3.909881000 | 0.922879000  |
| 6 | 0.587553000  | 1.065455000 | 1.938942000  |
| 1 | 1.283639000  | 0.218448000 | 1.971758000  |
| 1 | -0.377558000 | 0.660327000 | 2.269735000  |
| 6 | 1.056042000  | 2.166528000 | 2.877877000  |
| 1 | 1.063595000  | 1.842074000 | 3.921756000  |
| 1 | 2.072050000  | 2.486949000 | 2.634131000  |
| 1 | 0.415328000  | 3.051416000 | 2.817165000  |

**14SiP<sup>Si-H</sup>** (T.E.= -1874.885518)

|    |              |              |              |
|----|--------------|--------------|--------------|
| 6  | 0.688264000  | -2.178206000 | 0.454880000  |
| 6  | 1.340697000  | -1.276597000 | -0.447417000 |
| 7  | -1.239272000 | -0.713123000 | -0.274876000 |
| 6  | -2.529028000 | -0.427739000 | -0.728089000 |
| 6  | -3.496316000 | -1.432583000 | -0.819217000 |
| 6  | -4.763987000 | -1.156833000 | -1.292660000 |
| 6  | -5.103981000 | 0.122809000  | -1.706151000 |
| 6  | -4.149016000 | 1.122172000  | -1.640831000 |
| 6  | -2.880316000 | 0.852617000  | -1.157333000 |
| 1  | -3.232249000 | -2.439981000 | -0.515658000 |
| 1  | -5.493935000 | -1.956723000 | -1.351062000 |
| 1  | -6.098226000 | 0.334412000  | -2.080661000 |
| 1  | -4.390752000 | 2.128568000  | -1.964245000 |
| 1  | -2.147516000 | 1.651827000  | -1.103487000 |
| 5  | -0.839873000 | -1.711852000 | 0.701821000  |
| 7  | -1.618861000 | -2.122966000 | 1.798658000  |
| 6  | -1.267264000 | -3.247334000 | 2.639843000  |
| 1  | -1.128783000 | -2.923343000 | 3.678532000  |
| 1  | -2.072100000 | -3.993044000 | 2.635354000  |
| 1  | -0.346313000 | -3.705799000 | 2.285092000  |
| 6  | -2.821205000 | -1.463642000 | 2.248422000  |
| 1  | -3.718506000 | -2.067791000 | 2.060120000  |
| 1  | -2.761321000 | -1.291746000 | 3.329179000  |
| 1  | -2.956572000 | -0.499062000 | 1.761253000  |
| 15 | 2.951000000  | -1.636132000 | -0.869702000 |
| 6  | 3.151496000  | -3.270137000 | -1.598317000 |
| 1  | 4.202192000  | -3.467260000 | -1.819558000 |
| 1  | 2.774064000  | -4.004208000 | -0.886666000 |
| 1  | 2.565356000  | -3.325582000 | -2.516174000 |

|    |              |              |              |
|----|--------------|--------------|--------------|
| 6  | 4.129513000  | -1.584194000 | 0.493089000  |
| 1  | 5.126349000  | -1.868059000 | 0.150304000  |
| 1  | 4.160892000  | -0.577394000 | 0.911386000  |
| 1  | 3.790384000  | -2.278943000 | 1.261470000  |
| 6  | 3.556756000  | -0.471908000 | -2.099924000 |
| 1  | 2.931409000  | -0.528465000 | -2.992204000 |
| 1  | 3.518844000  | 0.544007000  | -1.703071000 |
| 1  | 4.587133000  | -0.710152000 | -2.368647000 |
| 8  | 1.252656000  | -3.164418000 | 0.968748000  |
| 14 | 0.195964000  | 0.042052000  | -0.981313000 |
| 1  | -0.001321000 | 0.187065000  | -2.454725000 |
| 14 | 0.608193000  | 2.105388000  | 0.091221000  |
| 6  | -0.187516000 | 3.573892000  | -0.804159000 |
| 1  | -1.247531000 | 3.592055000  | -0.523074000 |
| 1  | -0.174228000 | 3.356162000  | -1.878747000 |
| 6  | 2.483275000  | 2.348566000  | 0.242511000  |
| 1  | 2.907703000  | 1.349043000  | 0.400254000  |
| 1  | 2.865125000  | 2.687132000  | -0.729039000 |
| 6  | -0.155484000 | 1.882669000  | 1.808282000  |
| 1  | -1.099256000 | 1.340783000  | 1.669906000  |
| 1  | 0.490849000  | 1.195550000  | 2.370175000  |
| 6  | 0.436762000  | 4.937881000  | -0.545142000 |
| 1  | 1.486737000  | 4.961104000  | -0.847720000 |
| 1  | -0.074748000 | 5.730662000  | -1.097042000 |
| 1  | 0.400855000  | 5.206220000  | 0.513921000  |
| 6  | 2.968720000  | 3.270479000  | 1.352988000  |
| 1  | 4.059944000  | 3.325602000  | 1.387492000  |
| 1  | 2.597140000  | 4.290734000  | 1.233076000  |
| 1  | 2.632538000  | 2.917209000  | 2.331019000  |
| 6  | -0.409592000 | 3.157095000  | 2.601011000  |
| 1  | -0.862886000 | 2.948487000  | 3.573512000  |
| 1  | 0.510406000  | 3.717485000  | 2.784264000  |
| 1  | -1.090511000 | 3.824436000  | 2.066007000  |

**1GeP<sup>Si-H</sup>** (T.E.= -3825.501081)

|   |              |              |             |
|---|--------------|--------------|-------------|
| 6 | 0.152661000  | -1.725463000 | 1.616970000 |
| 6 | -1.123611000 | -0.897706000 | 1.700551000 |
| 6 | -1.664542000 | -0.558109000 | 0.289700000 |
| 1 | 0.694274000  | -1.654425000 | 2.570637000 |
| 1 | -0.086659000 | -2.792769000 | 1.477476000 |

|    |              |              |              |
|----|--------------|--------------|--------------|
| 1  | -0.889266000 | 0.024362000  | 2.248391000  |
| 1  | -1.869190000 | -1.426929000 | 2.304600000  |
| 32 | 0.031242000  | 0.031123000  | -0.531142000 |
| 7  | 0.958187000  | -1.235208000 | 0.520634000  |
| 14 | -2.259069000 | -2.124405000 | -0.609079000 |
| 14 | -2.969879000 | 0.793044000  | 0.362517000  |
| 6  | -2.481182000 | 2.124427000  | 1.595590000  |
| 1  | -1.478104000 | 2.525562000  | 1.440734000  |
| 1  | -3.184193000 | 2.957523000  | 1.502393000  |
| 1  | -2.542389000 | 1.758398000  | 2.623430000  |
| 6  | -3.213900000 | 1.599793000  | -1.317568000 |
| 1  | -3.903543000 | 1.031056000  | -1.942668000 |
| 1  | -3.633469000 | 2.601386000  | -1.188773000 |
| 1  | -2.278759000 | 1.704753000  | -1.875132000 |
| 6  | -4.625649000 | 0.162264000  | 0.980610000  |
| 1  | -4.514880000 | -0.333892000 | 1.949037000  |
| 1  | -5.298222000 | 1.012703000  | 1.123793000  |
| 1  | -5.113853000 | -0.534456000 | 0.296463000  |
| 6  | -3.311770000 | -1.699367000 | -2.100791000 |
| 1  | -2.765219000 | -1.066330000 | -2.804882000 |
| 1  | -3.562401000 | -2.628955000 | -2.619159000 |
| 1  | -4.247295000 | -1.196880000 | -1.848038000 |
| 6  | -0.891733000 | -3.229361000 | -1.272331000 |
| 1  | -0.224951000 | -3.615759000 | -0.499040000 |
| 1  | -1.372603000 | -4.086992000 | -1.753665000 |
| 1  | -0.276495000 | -2.734252000 | -2.026606000 |
| 6  | -3.254542000 | -3.178731000 | 0.581342000  |
| 1  | -2.616991000 | -3.598465000 | 1.363516000  |
| 1  | -4.063256000 | -2.627361000 | 1.063607000  |
| 1  | -3.696235000 | -4.016903000 | 0.035673000  |
| 6  | 2.185377000  | -1.790010000 | 0.265312000  |
| 6  | 2.917366000  | -1.411694000 | -0.871894000 |
| 6  | 2.765438000  | -2.747724000 | 1.111817000  |
| 6  | 4.163673000  | -1.941234000 | -1.132283000 |
| 1  | 2.486415000  | -0.699812000 | -1.568785000 |
| 6  | 4.015920000  | -3.273727000 | 0.835298000  |
| 1  | 2.235877000  | -3.082231000 | 1.994722000  |
| 6  | 4.732272000  | -2.877392000 | -0.280004000 |
| 1  | 4.696425000  | -1.621653000 | -2.021415000 |
| 1  | 4.434389000  | -4.010354000 | 1.512930000  |

|    |              |              |              |
|----|--------------|--------------|--------------|
| 1  | 5.710444000  | -3.293331000 | -0.487470000 |
| 1  | 0.119994000  | -0.378607000 | -2.031627000 |
| 14 | 1.036833000  | 2.204738000  | -0.171737000 |
| 6  | -0.091801000 | 3.597083000  | -0.781948000 |
| 1  | 0.097546000  | 3.704071000  | -1.857176000 |
| 1  | -1.138206000 | 3.291849000  | -0.699012000 |
| 6  | 0.097477000  | 4.932581000  | -0.073104000 |
| 1  | 1.130263000  | 5.285924000  | -0.124426000 |
| 1  | -0.534182000 | 5.711026000  | -0.507337000 |
| 1  | -0.162372000 | 4.857991000  | 0.985976000  |
| 6  | 2.621243000  | 2.210071000  | -1.193869000 |
| 1  | 3.263274000  | 1.389011000  | -0.858714000 |
| 1  | 2.352260000  | 1.973492000  | -2.230733000 |
| 6  | 3.377403000  | 3.529611000  | -1.129794000 |
| 1  | 2.776826000  | 4.356257000  | -1.518219000 |
| 1  | 3.653703000  | 3.782744000  | -0.101936000 |
| 1  | 4.300986000  | 3.499289000  | -1.712660000 |
| 6  | 1.479255000  | 2.437714000  | 1.646235000  |
| 1  | 1.904003000  | 3.445234000  | 1.734945000  |
| 1  | 0.565122000  | 2.455122000  | 2.249189000  |
| 6  | 2.459385000  | 1.410672000  | 2.196035000  |
| 1  | 3.379037000  | 1.373769000  | 1.604953000  |
| 1  | 2.746192000  | 1.636767000  | 3.225392000  |
| 1  | 2.035839000  | 0.403110000  | 2.182669000  |

**2GeP<sup>Si-H</sup>** (T.E.= -3824.302867)

|    |              |              |              |
|----|--------------|--------------|--------------|
| 6  | -1.700691000 | -0.789030000 | 0.074774000  |
| 6  | -1.404742000 | -2.258426000 | 0.290989000  |
| 6  | -0.134225000 | -2.657927000 | 0.434948000  |
| 1  | -2.215829000 | -2.966195000 | 0.423112000  |
| 1  | 0.134179000  | -3.682151000 | 0.674380000  |
| 32 | 0.115097000  | -0.165815000 | -0.424311000 |
| 7  | 0.882923000  | -1.722077000 | 0.363540000  |
| 14 | -2.195853000 | -0.108336000 | 1.772086000  |
| 14 | -2.983933000 | -0.595849000 | -1.296474000 |
| 6  | -2.495062000 | 1.745168000  | 1.797171000  |
| 1  | -2.616250000 | 2.056965000  | 2.838981000  |
| 1  | -1.666316000 | 2.320220000  | 1.381252000  |
| 1  | -3.399945000 | 2.027717000  | 1.257633000  |
| 6  | -4.366979000 | -1.843875000 | -1.082118000 |

|    |              |              |              |
|----|--------------|--------------|--------------|
| 1  | -4.848502000 | -1.794484000 | -0.103976000 |
| 1  | -5.130809000 | -1.649907000 | -1.840566000 |
| 1  | -4.006579000 | -2.863917000 | -1.233821000 |
| 6  | -3.752181000 | 1.115689000  | -1.317489000 |
| 1  | -3.008963000 | 1.915074000  | -1.256477000 |
| 1  | -4.308899000 | 1.247756000  | -2.249117000 |
| 1  | -4.454569000 | 1.247292000  | -0.490739000 |
| 6  | -2.242044000 | -0.933477000 | -2.983808000 |
| 1  | -1.574295000 | -0.139775000 | -3.326068000 |
| 1  | -1.675476000 | -1.868347000 | -2.984235000 |
| 1  | -3.052284000 | -1.028085000 | -3.712404000 |
| 6  | -3.780345000 | -0.912909000 | 2.369741000  |
| 1  | -3.961003000 | -0.619774000 | 3.407649000  |
| 1  | -4.641894000 | -0.587546000 | 1.781157000  |
| 1  | -3.733830000 | -2.003611000 | 2.334206000  |
| 6  | -0.853657000 | -0.469332000 | 3.029510000  |
| 1  | -1.172658000 | -0.092589000 | 4.005558000  |
| 1  | -0.666879000 | -1.540653000 | 3.122740000  |
| 1  | 0.094220000  | 0.013673000  | 2.780013000  |
| 6  | 2.213819000  | -2.088182000 | 0.188007000  |
| 6  | 3.217664000  | -1.207548000 | 0.595088000  |
| 6  | 2.596274000  | -3.300792000 | -0.390282000 |
| 6  | 4.551638000  | -1.516023000 | 0.418306000  |
| 1  | 2.929916000  | -0.283587000 | 1.087306000  |
| 6  | 3.935711000  | -3.612614000 | -0.544877000 |
| 1  | 1.837501000  | -3.990459000 | -0.741933000 |
| 6  | 4.923126000  | -2.725302000 | -0.149776000 |
| 1  | 5.308946000  | -0.810948000 | 0.743609000  |
| 1  | 4.209281000  | -4.558969000 | -0.998397000 |
| 1  | 5.969441000  | -2.973077000 | -0.281029000 |
| 1  | 0.377772000  | -0.435995000 | -1.944427000 |
| 14 | 1.112223000  | 1.994453000  | -0.023959000 |
| 6  | -0.019294000 | 3.238260000  | -0.876646000 |
| 1  | 0.483442000  | 4.212180000  | -0.845327000 |
| 1  | -0.935927000 | 3.362653000  | -0.290554000 |
| 6  | 2.777738000  | 1.957985000  | -0.920325000 |
| 1  | 3.518977000  | 1.574289000  | -0.209784000 |
| 1  | 2.736550000  | 1.212107000  | -1.721953000 |
| 6  | 1.356461000  | 2.419813000  | 1.790934000  |
| 1  | 0.383372000  | 2.427581000  | 2.292818000  |

|   |              |             |              |
|---|--------------|-------------|--------------|
| 1 | 1.925693000  | 1.609376000 | 2.260725000  |
| 6 | -0.357101000 | 2.866212000 | -2.314058000 |
| 1 | -0.933162000 | 3.646820000 | -2.815856000 |
| 1 | 0.542505000  | 2.688072000 | -2.910220000 |
| 1 | -0.953737000 | 1.949978000 | -2.363577000 |
| 6 | 3.233745000  | 3.299397000 | -1.480214000 |
| 1 | 2.562079000  | 3.658154000 | -2.263715000 |
| 1 | 3.270195000  | 4.074469000 | -0.710463000 |
| 1 | 4.231513000  | 3.230516000 | -1.919605000 |
| 6 | 2.072661000  | 3.747702000 | 2.000656000  |
| 1 | 1.534145000  | 4.575167000 | 1.530337000  |
| 1 | 2.177017000  | 3.989456000 | 3.060642000  |
| 1 | 3.077996000  | 3.728114000 | 1.572530000  |

**3GeP<sup>Si-H</sup>** (T.E.= -3945.602725)

|    |              |              |              |
|----|--------------|--------------|--------------|
| 6  | -1.857170000 | -1.762223000 | -0.323541000 |
| 6  | -1.894603000 | -0.218613000 | -0.077001000 |
| 1  | -2.621006000 | -2.260342000 | 0.287549000  |
| 1  | -2.148256000 | -1.985574000 | -1.363157000 |
| 7  | 0.640856000  | -1.431446000 | -0.113357000 |
| 5  | -0.407662000 | -2.401997000 | -0.104760000 |
| 7  | -0.245446000 | -3.804823000 | 0.053527000  |
| 6  | -1.323183000 | -4.743489000 | -0.140638000 |
| 1  | -1.063046000 | -5.478928000 | -0.913125000 |
| 1  | -1.536444000 | -5.304577000 | 0.779013000  |
| 1  | -2.238172000 | -4.245163000 | -0.454434000 |
| 6  | 0.984105000  | -4.486514000 | 0.380107000  |
| 1  | 1.371625000  | -5.060115000 | -0.473008000 |
| 1  | 1.757694000  | -3.792020000 | 0.698800000  |
| 1  | 0.814283000  | -5.197088000 | 1.198409000  |
| 14 | -2.187977000 | 0.101185000  | 1.758076000  |
| 14 | -3.175800000 | 0.562224000  | -1.213178000 |
| 6  | -0.976676000 | -0.867722000 | 2.815426000  |
| 1  | 0.061176000  | -0.582717000 | 2.630132000  |
| 1  | -1.199010000 | -0.673707000 | 3.868792000  |
| 1  | -1.057172000 | -1.945012000 | 2.649357000  |
| 6  | -3.908116000 | -0.438067000 | 2.283985000  |
| 1  | -3.967562000 | -0.409841000 | 3.375584000  |
| 1  | -4.676073000 | 0.234740000  | 1.895320000  |
| 1  | -4.152433000 | -1.453502000 | 1.964759000  |

|    |              |              |              |
|----|--------------|--------------|--------------|
| 6  | -4.800566000 | -0.374954000 | -1.137521000 |
| 1  | -5.510882000 | 0.094259000  | -1.824182000 |
| 1  | -4.674839000 | -1.413137000 | -1.454135000 |
| 1  | -5.249134000 | -0.379044000 | -0.143365000 |
| 6  | -3.513351000 | 2.361635000  | -0.796181000 |
| 1  | -4.026978000 | 2.837160000  | -1.636169000 |
| 1  | -4.156404000 | 2.460476000  | 0.081324000  |
| 1  | -2.597243000 | 2.926751000  | -0.602697000 |
| 6  | -2.039768000 | 1.913326000  | 2.232409000  |
| 1  | -2.950586000 | 2.465071000  | 1.993374000  |
| 1  | -1.881288000 | 1.986051000  | 3.312337000  |
| 1  | -1.208729000 | 2.425263000  | 1.745125000  |
| 6  | -2.642448000 | 0.499587000  | -3.012714000 |
| 1  | -1.837936000 | 1.203380000  | -3.235645000 |
| 1  | -2.305441000 | -0.494683000 | -3.316086000 |
| 1  | -3.501130000 | 0.764729000  | -3.636651000 |
| 32 | -0.043884000 | 0.267609000  | -0.566587000 |
| 6  | 2.028871000  | -1.613144000 | -0.249581000 |
| 6  | 2.582529000  | -1.962411000 | -1.479548000 |
| 6  | 2.885000000  | -1.408317000 | 0.830828000  |
| 6  | 3.952059000  | -2.104081000 | -1.623096000 |
| 1  | 1.914798000  | -2.121822000 | -2.320686000 |
| 6  | 4.254768000  | -1.547561000 | 0.685861000  |
| 1  | 2.453458000  | -1.160427000 | 1.795599000  |
| 6  | 4.794970000  | -1.892355000 | -0.543334000 |
| 1  | 4.364931000  | -2.378995000 | -2.587188000 |
| 1  | 4.903801000  | -1.387819000 | 1.539630000  |
| 1  | 5.866990000  | -1.999649000 | -0.657940000 |
| 1  | 0.096290000  | 0.317937000  | -2.126610000 |
| 14 | 1.393273000  | 2.044895000  | 0.212416000  |
| 6  | 2.950685000  | 1.816419000  | -0.833858000 |
| 1  | 3.535634000  | 1.004873000  | -0.384286000 |
| 1  | 2.637756000  | 1.432477000  | -1.812085000 |
| 6  | 0.593187000  | 3.695695000  | -0.221790000 |
| 1  | 1.314541000  | 4.489591000  | 0.006962000  |
| 1  | -0.257281000 | 3.871279000  | 0.446026000  |
| 6  | 0.150594000  | 3.783758000  | -1.675563000 |
| 1  | -0.263466000 | 4.763671000  | -1.923676000 |
| 1  | 0.978864000  | 3.594445000  | -2.364185000 |
| 1  | -0.622278000 | 3.042263000  | -1.902722000 |

|   |             |             |              |
|---|-------------|-------------|--------------|
| 6 | 3.811796000 | 3.059616000 | -1.014868000 |
| 1 | 3.270960000 | 3.856081000 | -1.532439000 |
| 1 | 4.148288000 | 3.469311000 | -0.059386000 |
| 1 | 4.705391000 | 2.843984000 | -1.605834000 |
| 6 | 1.761468000 | 1.946286000 | 2.058888000  |
| 1 | 0.894585000 | 2.339946000 | 2.600852000  |
| 1 | 1.832482000 | 0.891211000 | 2.341265000  |
| 6 | 3.029487000 | 2.675771000 | 2.479228000  |
| 1 | 3.011825000 | 3.728229000 | 2.181944000  |
| 1 | 3.174460000 | 2.647428000 | 3.561765000  |
| 1 | 3.912898000 | 2.221828000 | 2.021772000  |

**4GeP<sup>Si-H</sup>** (T.E.= -4155.511833)

|    |              |              |              |
|----|--------------|--------------|--------------|
| 6  | 2.019413000  | -1.922707000 | 0.128892000  |
| 6  | 1.925850000  | -0.358407000 | 0.061817000  |
| 1  | 2.693028000  | -2.315188000 | -0.642353000 |
| 1  | 2.467565000  | -2.249728000 | 1.075326000  |
| 7  | -0.736594000 | -1.494965000 | -0.041759000 |
| 14 | 3.155208000  | 0.280702000  | -1.213829000 |
| 14 | 2.183339000  | 0.289749000  | 1.809370000  |
| 6  | 2.985421000  | -0.662524000 | -2.829665000 |
| 1  | 2.008008000  | -0.507501000 | -3.291038000 |
| 1  | 3.745265000  | -0.298962000 | -3.527450000 |
| 1  | 3.136730000  | -1.738233000 | -2.713291000 |
| 6  | 4.929139000  | 0.065340000  | -0.642115000 |
| 1  | 5.602686000  | 0.230665000  | -1.487486000 |
| 1  | 5.194968000  | 0.782216000  | 0.137995000  |
| 1  | 5.116866000  | -0.939612000 | -0.256061000 |
| 6  | 3.791692000  | -0.299637000 | 2.584050000  |
| 1  | 4.665349000  | 0.197576000  | 2.160898000  |
| 1  | 3.757341000  | -0.058834000 | 3.650888000  |
| 1  | 3.943294000  | -1.377738000 | 2.499046000  |
| 6  | 2.242359000  | 2.163872000  | 1.889934000  |
| 1  | 2.168097000  | 2.484274000  | 2.933149000  |
| 1  | 3.196103000  | 2.531342000  | 1.501372000  |
| 1  | 1.442396000  | 2.656885000  | 1.335297000  |
| 6  | 2.895821000  | 2.096124000  | -1.608508000 |
| 1  | 3.027904000  | 2.741363000  | -0.737799000 |
| 1  | 3.627681000  | 2.401749000  | -2.361432000 |
| 1  | 1.904738000  | 2.288891000  | -2.026735000 |



|    |              |              |              |
|----|--------------|--------------|--------------|
| 6  | 0.834504000  | -0.362098000 | 2.941981000  |
| 1  | -0.174834000 | -0.162507000 | 2.579693000  |
| 1  | 0.934080000  | -1.444056000 | 3.067376000  |
| 1  | 0.938421000  | 0.095456000  | 3.930252000  |
| 14 | 0.365852000  | -2.819118000 | -0.057414000 |
| 6  | 0.006239000  | -4.016028000 | 1.329169000  |
| 1  | 0.051159000  | -3.524074000 | 2.303726000  |
| 1  | -0.993296000 | -4.443847000 | 1.213488000  |
| 1  | 0.722079000  | -4.841606000 | 1.328314000  |
| 6  | 0.327265000  | -3.748007000 | -1.680924000 |
| 1  | 0.492961000  | -3.056791000 | -2.512951000 |
| 1  | 1.104747000  | -4.515579000 | -1.719313000 |
| 1  | -0.636762000 | -4.239134000 | -1.836615000 |
| 32 | 0.079390000  | 0.106430000  | -0.564396000 |
| 6  | -2.133209000 | -1.663168000 | -0.067115000 |
| 6  | -2.828029000 | -1.823448000 | -1.265522000 |
| 6  | -2.856972000 | -1.673344000 | 1.124750000  |
| 6  | -4.203367000 | -1.979609000 | -1.271542000 |
| 1  | -2.267413000 | -1.811072000 | -2.195980000 |
| 6  | -4.232361000 | -1.830435000 | 1.117772000  |
| 1  | -2.313995000 | -1.553770000 | 2.057787000  |
| 6  | -4.912474000 | -1.981806000 | -0.080646000 |
| 1  | -4.725631000 | -2.098978000 | -2.214253000 |
| 1  | -4.776905000 | -1.833842000 | 2.055429000  |
| 1  | -5.989134000 | -2.103388000 | -0.086236000 |
| 1  | 0.093907000  | 0.107084000  | -2.135630000 |
| 14 | -1.315661000 | 2.000519000  | 0.035936000  |
| 6  | -2.957379000 | 1.674895000  | -0.835030000 |
| 1  | -2.728626000 | 1.292960000  | -1.837284000 |
| 1  | -3.448078000 | 0.844038000  | -0.315540000 |
| 6  | -3.898601000 | 2.868439000  | -0.939728000 |
| 1  | -4.801099000 | 2.616009000  | -1.501914000 |
| 1  | -4.220202000 | 3.223607000  | 0.040882000  |
| 1  | -3.430561000 | 3.715743000  | -1.447300000 |
| 6  | -0.536344000 | 3.557773000  | -0.692569000 |
| 1  | -1.065791000 | 4.430422000  | -0.292572000 |
| 1  | 0.491947000  | 3.646764000  | -0.326315000 |
| 6  | -0.552424000 | 3.592195000  | -2.216007000 |
| 1  | -1.568983000 | 3.685736000  | -2.603925000 |
| 1  | 0.024546000  | 4.431774000  | -2.610472000 |

|   |              |             |              |
|---|--------------|-------------|--------------|
| 1 | -0.135496000 | 2.679531000 | -2.652489000 |
| 6 | -1.550129000 | 2.148577000 | 1.899541000  |
| 1 | -1.901355000 | 1.175381000 | 2.262553000  |
| 1 | -0.569076000 | 2.300381000 | 2.362768000  |
| 6 | -2.515211000 | 3.239148000 | 2.344895000  |
| 1 | -3.538465000 | 3.012075000 | 2.038845000  |
| 1 | -2.521891000 | 3.350765000 | 3.431700000  |
| 1 | -2.258157000 | 4.213960000 | 1.921182000  |

**5GeP<sup>Si-H</sup>** (T.E.= -3899.569674)

|    |              |              |              |
|----|--------------|--------------|--------------|
| 6  | -1.572519000 | -1.027279000 | 1.530990000  |
| 6  | -1.932639000 | -0.241352000 | 0.248106000  |
| 1  | -1.433175000 | -0.362279000 | 2.394877000  |
| 1  | -2.365784000 | -1.717990000 | 1.837507000  |
| 7  | 0.511886000  | -1.486164000 | 0.415110000  |
| 14 | -2.710421000 | 1.410951000  | 0.705616000  |
| 14 | -2.997156000 | -1.351283000 | -0.863287000 |
| 6  | -1.536319000 | 2.452570000  | 1.737999000  |
| 1  | -0.719688000 | 2.876606000  | 1.151322000  |
| 1  | -2.103408000 | 3.290952000  | 2.152388000  |
| 1  | -1.100266000 | 1.908245000  | 2.578985000  |
| 6  | -4.232850000 | 1.180149000  | 1.774221000  |
| 1  | -4.523438000 | 2.146907000  | 2.193851000  |
| 1  | -5.086893000 | 0.784159000  | 1.224543000  |
| 1  | -4.031397000 | 0.506944000  | 2.611802000  |
| 6  | -4.691428000 | -1.648667000 | -0.115314000 |
| 1  | -5.334917000 | -0.771955000 | -0.213873000 |
| 1  | -5.168680000 | -2.469127000 | -0.658694000 |
| 1  | -4.657041000 | -1.928942000 | 0.939739000  |
| 6  | -3.278689000 | -0.632775000 | -2.570906000 |
| 1  | -3.773773000 | -1.391900000 | -3.183225000 |
| 1  | -3.929369000 | 0.242825000  | -2.545235000 |
| 1  | -2.353099000 | -0.353953000 | -3.077973000 |
| 6  | -3.146192000 | 2.396515000  | -0.827008000 |
| 1  | -4.060522000 | 2.031576000  | -1.300002000 |
| 1  | -3.306211000 | 3.445022000  | -0.562238000 |
| 1  | -2.348129000 | 2.361735000  | -1.575387000 |
| 6  | -2.187346000 | -3.031282000 | -1.055505000 |
| 1  | -1.217848000 | -2.981042000 | -1.554314000 |
| 1  | -2.045283000 | -3.537435000 | -0.097643000 |

|    |              |              |              |
|----|--------------|--------------|--------------|
| 1  | -2.842112000 | -3.660359000 | -1.665176000 |
| 6  | 1.823319000  | -1.987059000 | 0.268222000  |
| 6  | 2.733185000  | -1.952592000 | 1.321092000  |
| 6  | 2.239264000  | -2.455092000 | -0.972374000 |
| 6  | 4.037445000  | -2.367466000 | 1.123586000  |
| 1  | 2.410438000  | -1.597293000 | 2.292436000  |
| 6  | 3.546252000  | -2.867370000 | -1.165381000 |
| 1  | 1.527887000  | -2.488128000 | -1.791072000 |
| 6  | 4.452048000  | -2.821617000 | -0.119173000 |
| 1  | 4.738772000  | -2.331047000 | 1.949407000  |
| 1  | 3.856659000  | -3.226356000 | -2.139792000 |
| 1  | 5.476574000  | -3.140869000 | -0.268931000 |
| 6  | -0.286249000 | -1.836889000 | 1.464753000  |
| 8  | -0.020439000 | -2.677584000 | 2.299037000  |
| 32 | -0.169431000 | -0.055348000 | -0.635343000 |
| 1  | -0.222466000 | -0.566897000 | -2.103986000 |
| 14 | 1.509668000  | 1.653898000  | -0.345997000 |
| 6  | 2.937240000  | 1.048166000  | -1.423044000 |
| 1  | 3.354438000  | 0.140077000  | -0.972232000 |
| 1  | 2.498051000  | 0.723936000  | -2.374803000 |
| 6  | 0.952028000  | 3.350804000  | -0.957732000 |
| 1  | 1.120437000  | 3.364037000  | -2.040989000 |
| 1  | -0.128479000 | 3.466731000  | -0.826707000 |
| 6  | 1.680805000  | 4.512232000  | -0.293408000 |
| 1  | 2.764700000  | 4.429602000  | -0.407927000 |
| 1  | 1.381975000  | 5.473972000  | -0.716464000 |
| 1  | 1.472542000  | 4.552824000  | 0.778888000  |
| 6  | 4.036237000  | 2.069328000  | -1.686759000 |
| 1  | 3.645219000  | 2.968688000  | -2.170183000 |
| 1  | 4.528606000  | 2.383718000  | -0.763396000 |
| 1  | 4.810020000  | 1.663270000  | -2.342572000 |
| 6  | 1.939034000  | 1.620487000  | 1.496860000  |
| 1  | 1.372045000  | 2.407597000  | 2.002615000  |
| 1  | 1.548441000  | 0.676831000  | 1.898538000  |
| 6  | 3.419259000  | 1.737197000  | 1.831387000  |
| 1  | 3.837994000  | 2.689363000  | 1.495781000  |
| 1  | 3.590174000  | 1.669854000  | 2.908474000  |
| 1  | 3.998522000  | 0.937106000  | 1.362259000  |

**8Ge<sup>PSi-H</sup>** (T.E.= -3468.168590)

|    |              |              |              |
|----|--------------|--------------|--------------|
| 6  | -0.100611000 | -2.369804000 | 1.069153000  |
| 6  | 1.364932000  | -2.523568000 | 0.692202000  |
| 6  | 1.822137000  | -1.279429000 | -0.047440000 |
| 1  | -0.539370000 | -3.346617000 | 1.307785000  |
| 1  | -0.185142000 | -1.747768000 | 1.978057000  |
| 1  | 1.468453000  | -3.429512000 | 0.074932000  |
| 1  | 1.940319000  | -2.710159000 | 1.609534000  |
| 32 | 0.313975000  | -0.501586000 | -0.906080000 |
| 7  | -0.803891000 | -1.773996000 | -0.049681000 |
| 15 | 3.404719000  | -0.773066000 | -0.025499000 |
| 6  | 4.019830000  | -0.013456000 | 1.511489000  |
| 1  | 3.848273000  | -0.709102000 | 2.336048000  |
| 1  | 5.085195000  | 0.223696000  | 1.462323000  |
| 1  | 3.448869000  | 0.895794000  | 1.710340000  |
| 6  | 3.747981000  | 0.453057000  | -1.297707000 |
| 1  | 3.505150000  | 0.038181000  | -2.276604000 |
| 1  | 3.144467000  | 1.346119000  | -1.128976000 |
| 1  | 4.801592000  | 0.735717000  | -1.272679000 |
| 6  | 4.610758000  | -2.103310000 | -0.277155000 |
| 1  | 5.635527000  | -1.735569000 | -0.195572000 |
| 1  | 4.450890000  | -2.871551000 | 0.482283000  |
| 1  | 4.454810000  | -2.551423000 | -1.259029000 |
| 6  | -2.176266000 | -1.709215000 | -0.040404000 |
| 6  | -2.861349000 | -1.231739000 | -1.170855000 |
| 6  | -2.954264000 | -2.113962000 | 1.054989000  |
| 6  | -4.237178000 | -1.151138000 | -1.196857000 |
| 1  | -2.287509000 | -0.937598000 | -2.045149000 |
| 6  | -4.336170000 | -2.031696000 | 1.013958000  |
| 1  | -2.474135000 | -2.485061000 | 1.951766000  |
| 6  | -4.994751000 | -1.548353000 | -0.102768000 |
| 1  | -4.727330000 | -0.777364000 | -2.089750000 |
| 1  | -4.905676000 | -2.348909000 | 1.881326000  |
| 1  | -6.075775000 | -1.486060000 | -0.125959000 |
| 1  | 0.196562000  | -0.722437000 | -2.449709000 |
| 14 | -0.354514000 | 1.680232000  | -0.126447000 |
| 6  | -1.984784000 | 2.251875000  | -0.886238000 |
| 1  | -1.778921000 | 2.595527000  | -1.907330000 |
| 1  | -2.619246000 | 1.365455000  | -0.993222000 |
| 6  | 1.023918000  | 2.925330000  | -0.500200000 |

|   |              |             |              |
|---|--------------|-------------|--------------|
| 1 | 1.865646000  | 2.696832000 | 0.167052000  |
| 1 | 1.383790000  | 2.725588000 | -1.516692000 |
| 6 | -0.521388000 | 1.418189000 | 1.736543000  |
| 1 | 0.256982000  | 0.699920000 | 2.024259000  |
| 1 | -1.474736000 | 0.901647000 | 1.908049000  |
| 6 | -2.746614000 | 3.315705000 | -0.104681000 |
| 1 | -2.176372000 | 4.241599000 | 0.008039000  |
| 1 | -3.689817000 | 3.573799000 | -0.592871000 |
| 1 | -2.992979000 | 2.961923000 | 0.900004000  |
| 6 | 0.646422000  | 4.395757000 | -0.381752000 |
| 1 | -0.160544000 | 4.651234000 | -1.072826000 |
| 1 | 0.301419000  | 4.648408000 | 0.623940000  |
| 1 | 1.489151000  | 5.052688000 | -0.611944000 |
| 6 | -0.416665000 | 2.661099000 | 2.609138000  |
| 1 | -1.179831000 | 3.402489000 | 2.359708000  |
| 1 | -0.528536000 | 2.424320000 | 3.670383000  |
| 1 | 0.555653000  | 3.147604000 | 2.489047000  |

**${}^9\text{GeP}^{\text{Si-H}}$  (T.E.= -3466.984119)**

|    |              |              |              |
|----|--------------|--------------|--------------|
| 6  | -0.066084000 | -2.557249000 | 0.790375000  |
| 6  | -1.379666000 | -2.276172000 | 0.846307000  |
| 6  | -1.901596000 | -1.249260000 | -0.039965000 |
| 7  | 0.707469000  | -1.832380000 | -0.128035000 |
| 15 | -3.464019000 | -0.656411000 | 0.031230000  |
| 6  | -4.718716000 | -1.950967000 | 0.162148000  |
| 1  | -4.537824000 | -2.538042000 | 1.064112000  |
| 1  | -5.718763000 | -1.517551000 | 0.221521000  |
| 1  | -4.649992000 | -2.610678000 | -0.702670000 |
| 6  | -3.864199000 | 0.293230000  | -1.444370000 |
| 1  | -4.870456000 | 0.707844000  | -1.366175000 |
| 1  | -3.156903000 | 1.115994000  | -1.566417000 |
| 1  | -3.801988000 | -0.355145000 | -2.318821000 |
| 6  | -3.905699000 | 0.435902000  | 1.419230000  |
| 1  | -3.287317000 | 1.335053000  | 1.388067000  |
| 1  | -4.960836000 | 0.718863000  | 1.400139000  |
| 1  | -3.690776000 | -0.091918000 | 2.350926000  |
| 32 | -0.385450000 | -0.518665000 | -0.965742000 |
| 6  | 2.079658000  | -1.764351000 | -0.071962000 |
| 6  | 2.787763000  | -1.206049000 | -1.146286000 |
| 6  | 2.824323000  | -2.206183000 | 1.033152000  |

|    |              |              |              |
|----|--------------|--------------|--------------|
| 6  | 4.162475000  | -1.084368000 | -1.112924000 |
| 1  | 2.238424000  | -0.886094000 | -2.027724000 |
| 6  | 4.201266000  | -2.086061000 | 1.050225000  |
| 1  | 2.313143000  | -2.617702000 | 1.895011000  |
| 6  | 4.887618000  | -1.522251000 | -0.014412000 |
| 1  | 4.674732000  | -0.645840000 | -1.962852000 |
| 1  | 4.747013000  | -2.428437000 | 1.923160000  |
| 1  | 5.966364000  | -1.429109000 | 0.009811000  |
| 1  | 0.404175000  | -3.359221000 | 1.344546000  |
| 1  | -2.026809000 | -2.852014000 | 1.502026000  |
| 1  | -0.387765000 | -0.717185000 | -2.516336000 |
| 14 | 0.420334000  | 1.595862000  | -0.142282000 |
| 6  | -0.968146000 | 2.879659000  | -0.260733000 |
| 1  | -1.926951000 | 2.357219000  | -0.163761000 |
| 1  | -0.961161000 | 3.299613000  | -1.273658000 |
| 6  | 1.950610000  | 2.216785000  | -1.055733000 |
| 1  | 2.785958000  | 1.565130000  | -0.774969000 |
| 1  | 1.784037000  | 2.029119000  | -2.123539000 |
| 6  | 0.765039000  | 1.183266000  | 1.669356000  |
| 1  | -0.188619000 | 1.260387000  | 2.207351000  |
| 1  | 1.038535000  | 0.123492000  | 1.719472000  |
| 6  | -0.901069000 | 3.988634000  | 0.780810000  |
| 1  | 0.032938000  | 4.551109000  | 0.715905000  |
| 1  | -1.719654000 | 4.704749000  | 0.671512000  |
| 1  | -0.959541000 | 3.581155000  | 1.793832000  |
| 6  | 2.315811000  | 3.679293000  | -0.839563000 |
| 1  | 1.505059000  | 4.347306000  | -1.143105000 |
| 1  | 2.534097000  | 3.890863000  | 0.210511000  |
| 1  | 3.199501000  | 3.963726000  | -1.416494000 |
| 6  | 1.843461000  | 2.014734000  | 2.348547000  |
| 1  | 1.995415000  | 1.712267000  | 3.387621000  |
| 1  | 2.803933000  | 1.900241000  | 1.837099000  |
| 1  | 1.602667000  | 3.081280000  | 2.352189000  |

**14GeP<sup>Si-H</sup>** (T.E.= -3662.342738)

|   |              |              |              |
|---|--------------|--------------|--------------|
| 6 | 0.525903000  | -2.150641000 | 0.475130000  |
| 6 | 1.213450000  | -1.359750000 | -0.493683000 |
| 7 | -1.369427000 | -0.581635000 | -0.199718000 |
| 6 | -2.639114000 | -0.277280000 | -0.673634000 |
| 6 | -3.673812000 | -1.220695000 | -0.639533000 |

|    |              |              |              |
|----|--------------|--------------|--------------|
| 6  | -4.924318000 | -0.926065000 | -1.145692000 |
| 6  | -5.189169000 | 0.310610000  | -1.715669000 |
| 6  | -4.171342000 | 1.246614000  | -1.775464000 |
| 6  | -2.918295000 | 0.959421000  | -1.264515000 |
| 1  | -3.473025000 | -2.201786000 | -0.223444000 |
| 1  | -5.701364000 | -1.681671000 | -1.105371000 |
| 1  | -6.170836000 | 0.535892000  | -2.114425000 |
| 1  | -4.350621000 | 2.218096000  | -2.222978000 |
| 1  | -2.136032000 | 1.711400000  | -1.320014000 |
| 5  | -0.965664000 | -1.585381000 | 0.763513000  |
| 7  | -1.714331000 | -1.929066000 | 1.907433000  |
| 6  | -1.410095000 | -3.059471000 | 2.757826000  |
| 1  | -1.192726000 | -2.726449000 | 3.780361000  |
| 1  | -2.270944000 | -3.738067000 | 2.813191000  |
| 1  | -0.546988000 | -3.596722000 | 2.370974000  |
| 6  | -2.830532000 | -1.162105000 | 2.402828000  |
| 1  | -3.784518000 | -1.693859000 | 2.288140000  |
| 1  | -2.692930000 | -0.963550000 | 3.472296000  |
| 1  | -2.913328000 | -0.204949000 | 1.889886000  |
| 15 | 2.835940000  | -1.749826000 | -0.821545000 |
| 6  | 3.078083000  | -3.431511000 | -1.414090000 |
| 1  | 4.138748000  | -3.630997000 | -1.578162000 |
| 1  | 2.678243000  | -4.112400000 | -0.663313000 |
| 1  | 2.529082000  | -3.563219000 | -2.346880000 |
| 6  | 3.959283000  | -1.569705000 | 0.579292000  |
| 1  | 4.964675000  | -1.911449000 | 0.325831000  |
| 1  | 3.995094000  | -0.518959000 | 0.874049000  |
| 1  | 3.567131000  | -2.158685000 | 1.408851000  |
| 6  | 3.485083000  | -0.670282000 | -2.105453000 |
| 1  | 2.873467000  | -0.765540000 | -3.003778000 |
| 1  | 3.454438000  | 0.366448000  | -1.764642000 |
| 1  | 4.517327000  | -0.933683000 | -2.341332000 |
| 8  | 1.051693000  | -3.135159000 | 1.037741000  |
| 32 | 0.170159000  | 0.164886000  | -1.001114000 |
| 1  | -0.098650000 | 0.332873000  | -2.523263000 |
| 14 | 0.862170000  | 2.111745000  | 0.224298000  |
| 6  | -0.411685000 | 3.498892000  | 0.305922000  |
| 1  | 0.100859000  | 4.401333000  | 0.659769000  |
| 1  | -0.740640000 | 3.731800000  | -0.713719000 |
| 6  | 2.477521000  | 2.743602000  | -0.539520000 |

|   |              |             |              |
|---|--------------|-------------|--------------|
| 1 | 3.276811000  | 2.083466000 | -0.174934000 |
| 1 | 2.437668000  | 2.593150000 | -1.624620000 |
| 6 | 1.188711000  | 1.446346000 | 1.955277000  |
| 1 | 0.246317000  | 1.050143000 | 2.353623000  |
| 1 | 1.849628000  | 0.576610000 | 1.858419000  |
| 6 | 1.790036000  | 2.469164000 | 2.907993000  |
| 1 | 1.927858000  | 2.065617000 | 3.914040000  |
| 1 | 2.769425000  | 2.806543000 | 2.556749000  |
| 1 | 1.157969000  | 3.357750000 | 2.997693000  |
| 6 | -1.607211000 | 3.199042000 | 1.200213000  |
| 1 | -1.305863000 | 3.089699000 | 2.244893000  |
| 1 | -2.353639000 | 3.995716000 | 1.161277000  |
| 1 | -2.111160000 | 2.272190000 | 0.912509000  |
| 6 | 2.821220000  | 4.196359000 | -0.239381000 |
| 1 | 3.794971000  | 4.478274000 | -0.647082000 |
| 1 | 2.080778000  | 4.873381000 | -0.671592000 |
| 1 | 2.846984000  | 4.396013000 | 0.835059000  |

**IX-PSi-H** (T.E.= -2608.125475)

|    |              |              |              |
|----|--------------|--------------|--------------|
| 6  | 0.674365000  | -2.447208000 | 0.415072000  |
| 6  | -0.727947000 | -2.223224000 | 0.978709000  |
| 6  | -1.485866000 | -1.094261000 | 0.214137000  |
| 6  | 1.428536000  | -1.096747000 | 0.181342000  |
| 1  | 1.239791000  | -3.110077000 | 1.083540000  |
| 1  | 0.580846000  | -2.997544000 | -0.525958000 |
| 1  | -0.638081000 | -1.958240000 | 2.039263000  |
| 1  | -1.287330000 | -3.168257000 | 0.957868000  |
| 14 | -0.033375000 | -0.004633000 | -0.376788000 |
| 14 | 2.367250000  | -0.651690000 | 1.764478000  |
| 14 | 2.699870000  | -1.337392000 | -1.222463000 |
| 14 | -2.711264000 | -0.317659000 | 1.422781000  |
| 14 | -2.377461000 | -1.814527000 | -1.300009000 |
| 6  | -3.769339000 | -1.608128000 | 2.288407000  |
| 1  | -3.168334000 | -2.443283000 | 2.656738000  |
| 1  | -4.227431000 | -1.130021000 | 3.159673000  |
| 1  | -4.570208000 | -2.014266000 | 1.672550000  |
| 6  | -3.869924000 | 0.932047000  | 0.640110000  |
| 1  | -4.534330000 | 1.309308000  | 1.422936000  |
| 1  | -3.340665000 | 1.789856000  | 0.218319000  |



|   |              |              |              |
|---|--------------|--------------|--------------|
| 1 | -4.497251000 | 0.502988000  | -0.143755000 |
| 6 | -1.851659000 | 0.546623000  | 2.852380000  |
| 1 | -2.562143000 | 1.244502000  | 3.305719000  |
| 1 | -1.572380000 | -0.176110000 | 3.622354000  |
| 1 | -0.962867000 | 1.113393000  | 2.576065000  |
| 6 | -2.905121000 | -0.527008000 | -2.557728000 |
| 1 | -3.468385000 | -1.041821000 | -3.341973000 |
| 1 | -3.559837000 | 0.236688000  | -2.133286000 |
| 1 | -2.058634000 | -0.025820000 | -3.030018000 |
| 6 | -1.345563000 | -3.093407000 | -2.211479000 |
| 1 | -1.932957000 | -3.442656000 | -3.065923000 |
| 1 | -0.401945000 | -2.704745000 | -2.595406000 |
| 1 | -1.131569000 | -3.962615000 | -1.584805000 |
| 6 | -3.939200000 | -2.754790000 | -0.837590000 |
| 1 | -3.764178000 | -3.505821000 | -0.063715000 |
| 1 | -4.748864000 | -2.101754000 | -0.505704000 |
| 1 | -4.285783000 | -3.277204000 | -1.734310000 |
| 6 | 1.389724000  | -0.876830000 | 3.350275000  |
| 1 | 0.571339000  | -0.167780000 | 3.462696000  |
| 1 | 0.992773000  | -1.887898000 | 3.465498000  |
| 1 | 2.088136000  | -0.704926000 | 4.175219000  |
| 6 | 3.830463000  | -1.806950000 | 2.040819000  |
| 1 | 4.597905000  | -1.789744000 | 1.266818000  |
| 1 | 4.302588000  | -1.513000000 | 2.983043000  |
| 1 | 3.495274000  | -2.841058000 | 2.159432000  |
| 6 | 2.995875000  | 1.113882000  | 1.811046000  |
| 1 | 3.521018000  | 1.259160000  | 2.759713000  |
| 1 | 3.690000000  | 1.353421000  | 1.005236000  |
| 1 | 2.176270000  | 1.835904000  | 1.780922000  |
| 6 | 2.074908000  | -1.071325000 | -2.975063000 |
| 1 | 1.184863000  | -1.643234000 | -3.238435000 |
| 1 | 1.869816000  | -0.018976000 | -3.183441000 |
| 1 | 2.884027000  | -1.391097000 | -3.640233000 |
| 6 | 3.341124000  | -3.103938000 | -1.204930000 |
| 1 | 4.172614000  | -3.175311000 | -1.911998000 |
| 1 | 3.699453000  | -3.437100000 | -0.230251000 |
| 1 | 2.570215000  | -3.803289000 | -1.538642000 |
| 6 | 4.175677000  | -0.173287000 | -1.144492000 |
| 1 | 4.788876000  | -0.259611000 | -0.247413000 |
| 1 | 4.810591000  | -0.414091000 | -2.002854000 |

|    |              |              |              |
|----|--------------|--------------|--------------|
| 1  | 3.872611000  | 0.871246000  | -1.251776000 |
| 1  | -0.071782000 | -0.051335000 | -1.870183000 |
| 14 | -0.001899000 | 2.357005000  | -0.336943000 |
| 6  | 1.643771000  | 2.803462000  | -1.169588000 |
| 6  | 1.669565000  | 4.131449000  | -1.914714000 |
| 1  | 1.859188000  | 1.991063000  | -1.876743000 |
| 1  | 2.446347000  | 2.769636000  | -0.425770000 |
| 1  | 2.631540000  | 4.299564000  | -2.405521000 |
| 1  | 0.901780000  | 4.167516000  | -2.691397000 |
| 1  | 1.493995000  | 4.977395000  | -1.246204000 |
| 6  | -1.374948000 | 2.791036000  | -1.573733000 |
| 6  | -2.000763000 | 4.171400000  | -1.442801000 |
| 1  | -2.155875000 | 2.026819000  | -1.516083000 |
| 1  | -0.933598000 | 2.663184000  | -2.570174000 |
| 1  | -2.761215000 | 4.345362000  | -2.208331000 |
| 1  | -2.488557000 | 4.300234000  | -0.472391000 |
| 1  | -1.258786000 | 4.968491000  | -1.536613000 |
| 6  | -0.221590000 | 3.288006000  | 1.296610000  |
| 6  | 0.325771000  | 4.708244000  | 1.313626000  |
| 1  | 0.257798000  | 2.709231000  | 2.093444000  |
| 1  | -1.289553000 | 3.285695000  | 1.546323000  |
| 1  | 0.164505000  | 5.190340000  | 2.281011000  |
| 1  | 1.402430000  | 4.719571000  | 1.122789000  |
| 1  | -0.144886000 | 5.338379000  | 0.554861000  |
